# Supplementary material for: Nutrigenomic regulation of sensory plasticity
Source: eLife. 2023 Mar 23;12:e83979. doi: 10.7554/eLife.83979 (PMC10036121; doi:10.7554/eLife.83979)
Supplement: Supplementary file 1. [file elife-83979-supp1.xlsx]

## Sheet: Contents Summary
Sheet name	Contents
Fly lines	Genotypes used in this paper
Dam-Pcl+osmi peaks	Peaks called for Dam-Pcl in the Gr5a+ cells using FDR 0.01. CD and SD concatanated
Dam-OGT peaks all	Peaks called for Dam-OGT in the Gr5a+ cells using FDR 0.01 for both CD and SD concatanated
Intersect_Pcl & OGT peaks	Intersect of the Peaks called for Dam-OGT and Dam-Pcl in the Gr5a+ cells using FDR 0.01
Deseq2 of diet+OSMI-1	Deseq2 analysis of the Gr5a-gal4/UAS-Rpl3-FLAG flies on a CD or SD + 10uM OSMI-1
Pcl and OGT genes	List of DEGs in SD7 flies reverted by Pcl mutations or OGT inhibition
Cis-regulatory overlap with OGT/Pcl or OGT/PRE	Cis-regulatory analysis of enrichment at OGT X PCL or OGT x PRE sites
Sr targets	List of DEGs that are Sr targets

## Sheet: Fly lines
Fly line	Source	Stock # or publication
w[1118]CS	A.Simon
UAST-sxc(Ogt)RNAiCLb38	C.Lehner	Radermacher et al., 2014
Gr5a-GAL4/Cyo	BDSC	57592
Tubulin-GAL80ts	BDSC	7018
UAS-Pcl	FlyORF	F001897
UAS-Rpl3-3XFLAG	D.Dickman	Chen and Dickman 2017
Pclc429/Cyo	N.Liu	Ma et al. 2018
UAS-LT3-Dam	A.H Brand
UAS-LT3-Dam::Pcl	M. Dus	Vaziri et al. 2020
UAS-LT3-Dam::OGT	This study
Gr64f-GAL4/Cyo	BDSC	57669
UAS-Sr	BDSC	26553
UAS-Rl WT	BDSC	36270
UAS-RL Sem	BDSC	59006
rolled 1	BDSC	386
Rolled RNAi	BDSC	34855
Sr RNAi	BDSC
OGA RNAi	BDSC	41882
OGT1	D. van Aalten	Mariappa et al. 2015.
OGTK872M	D. van Aalten	Mariappa et al. 2015.
UAS-mCherry.VALIUM10	BDSC	35787

## Sheet: Dam-Pcl +osmi peaks
chr2L	4951	9802
chr2L	365995	367023
chr2L	367959	369479
chr2L	369894	371198
chr2L	375138	376733
chr2L	376874	380048
chr2L	391631	393740
chr2L	435155	435468
chr2L	494019	495678
chr2L	502417	503650
chr2L	520871	522667
chr2L	522923	524419
chr2L	545353	548925
chr2L	554075	554542
chr2L	576531	578252
chr2L	581656	583430
chr2L	590548	597543
chr2L	598118	600594
chr2L	807126	809588
chr2L	1459970	1462474
chr2L	1637168	1640150
chr2L	1644105	1647187
chr2L	1648164	1651733
chr2L	1655730	1658629
chr2L	1667629	1671333
chr2L	1696706	1698089
chr2L	1943011	1945349
chr2L	1945564	1946668
chr2L	1953802	1955856
chr2L	1959602	1963143
chr2L	1964961	1974361
chr2L	2125661	2128609
chr2L	2162271	2163227
chr2L	2197045	2199445
chr2L	2200208	2204137
chr2L	2387662	2394328
chr2L	2400710	2402423
chr2L	2807318	2808160
chr2L	3533121	3536686
chr2L	3536764	3541542
chr2L	3542110	3542375
chr2L	3543130	3550933
chr2L	3553911	3554383
chr2L	3554847	3555268
chr2L	3556858	3557867
chr2L	3559110	3560224
chr2L	3561092	3562313
chr2L	3571169	3573171
chr2L	3573610	3576949
chr2L	3580753	3582309
chr2L	3602550	3605072
chr2L	3608684	3612588
chr2L	3615730	3617518
chr2L	3657777	3660123
chr2L	3661395	3664050
chr2L	3667393	3669412
chr2L	3670462	3676657
chr2L	3678424	3679409
chr2L	3684331	3686894
chr2L	3817606	3819523
chr2L	3823044	3826234
chr2L	3826343	3828461
chr2L	3828631	3829855
chr2L	3831648	3837515
chr2L	3854896	3856280
chr2L	4209643	4210861
chr2L	4658278	4659749
chr2L	4809392	4810816
chr2L	4811556	4813008
chr2L	5036672	5038252
chr2L	5341519	5344379
chr2L	5345012	5348495
chr2L	5361657	5363920
chr2L	5376450	5377263
chr2L	5380846	5381775
chr2L	5388274	5391186
chr2L	5393168	5393899
chr2L	5395749	5398951
chr2L	5399339	5400001
chr2L	5408088	5410935
chr2L	5418293	5423141
chr2L	5437241	5437650
chr2L	5437773	5442182
chr2L	5457803	5464176
chr2L	5476465	5478373
chr2L	5478580	5479836
chr2L	5505472	5505984
chr2L	5509125	5511172
chr2L	5589142	5591073
chr2L	5603304	5604665
chr2L	5611065	5613702
chr2L	5621700	5622869
chr2L	5703077	5704752
chr2L	5706407	5708521
chr2L	5920954	5928075
chr2L	5934221	5935996
chr2L	5978191	5979584
chr2L	6204424	6205353
chr2L	6410283	6413193
chr2L	6531229	6534571
chr2L	6534961	6537725
chr2L	6539255	6541060
chr2L	6542840	6545916
chr2L	6546059	6549877
chr2L	6808065	6812800
chr2L	6813821	6819028
chr2L	6819374	6825538
chr2L	6841746	6848272
chr2L	6848860	6852189
chr2L	7307220	7308697
chr2L	7339508	7340586
chr2L	7340851	7342863
chr2L	7358082	7359819
chr2L	7364717	7366013
chr2L	7375604	7376461
chr2L	8743229	8749432
chr2L	8752505	8753355
chr2L	8790336	8791980
chr2L	8793739	8794775
chr2L	8796362	8798963
chr2L	8815694	8817365
chr2L	8818058	8819052
chr2L	8821162	8823594
chr2L	8833379	8836114
chr2L	8838098	8841342
chr2L	8849303	8852504
chr2L	8855237	8855850
chr2L	8856451	8857466
chr2L	8858033	8859440
chr2L	8868643	8870653
chr2L	8870943	8872309
chr2L	8937643	8938191
chr2L	9018575	9022663
chr2L	9035784	9038573
chr2L	9069606	9074581
chr2L	9077464	9079026
chr2L	9080409	9085265
chr2L	9576889	9578022
chr2L	9578928	9580018
chr2L	9607501	9609269
chr2L	10292900	10297836
chr2L	10345522	10346210
chr2L	10347820	10349195
chr2L	10352024	10356912
chr2L	11228532	11229480
chr2L	11253816	11255456
chr2L	11283832	11285232
chr2L	11285812	11286628
chr2L	11291811	11295859
chr2L	11300724	11301904
chr2L	11302400	11304656
chr2L	11307962	11309155
chr2L	11329520	11336353
chr2L	11345394	11346884
chr2L	11349921	11350562
chr2L	11356815	11360637
chr2L	11378360	11380361
chr2L	11383065	11384517
chr2L	11385237	11386712
chr2L	11388094	11389162
chr2L	11392857	11395513
chr2L	11403054	11405400
chr2L	11413369	11414737
chr2L	11445050	11449672
chr2L	11450578	11452148
chr2L	11456847	11458858
chr2L	11486869	11491968
chr2L	11970125	11971448
chr2L	12009539	12011879
chr2L	12085312	12086113
chr2L	12547147	12552029
chr2L	12572098	12572862
chr2L	12574612	12578483
chr2L	12580602	12582175
chr2L	12595001	12598464
chr2L	12634124	12636724
chr2L	12637125	12641101
chr2L	12649244	12651857
chr2L	12658856	12661857
chr2L	12670719	12673273
chr2L	12676341	12683758
chr2L	12686962	12690629
chr2L	12910118	12912379
chr2L	13485497	13486675
chr2L	14115800	14118990
chr2L	14298988	14299430
chr2L	15105147	15106305
chr2L	15108878	15110061
chr2L	15275187	15277972
chr2L	15278964	15279998
chr2L	15299189	15300587
chr2L	15318454	15320996
chr2L	15330777	15331724
chr2L	15331915	15334314
chr2L	15339100	15341174
chr2L	15341403	15342646
chr2L	15353567	15359615
chr2L	15370391	15370929
chr2L	15399749	15401957
chr2L	15415459	15417968
chr2L	15420052	15422519
chr2L	15433918	15437431
chr2L	15441734	15442917
chr2L	15478177	15478660
chr2L	15536118	15538455
chr2L	15913754	15915091
chr2L	16370648	16372274
chr2L	16381579	16384361
chr2L	16388108	16392532
chr2L	16398757	16401152
chr2L	16405860	16406934
chr2L	16418770	16420980
chr2L	16421077	16422531
chr2L	16437144	16444829
chr2L	16447590	16447734
chr2L	16448276	16449048
chr2L	16450310	16451525
chr2L	16462938	16463904
chr2L	16474584	16475505
chr2L	16478647	16482772
chr2L	16483015	16487898
chr2L	16867316	16879799
chr2L	17374419	17375014
chr2L	18085472	18087805
chr2L	18159991	18161179
chr2L	18732331	18732968
chr2L	18733048	18735052
chr2L	18735647	18738640
chr2L	18740446	18742451
chr2L	18744373	18745802
chr2L	18749242	18749972
chr2L	18778893	18779653
chr2L	18781402	18782875
chr2L	18785001	18786928
chr2L	18787117	18788038
chr2L	18790203	18792286
chr2L	18794713	18798227
chr2L	18822402	18824905
chr2L	18860243	18861614
chr2L	18861851	18865617
chr2L	18874538	18875570
chr2L	18875624	18877331
chr2L	18877947	18883931
chr2L	18890722	18891535
chr2L	18916118	18917311
chr2L	18920593	18927179
chr2L	18928677	18931764
chr2L	18932686	18939522
chr2L	19024322	19026787
chr2L	19076286	19078972
chr2L	19081538	19084486
chr2L	19089184	19090384
chr2L	19090461	19097253
chr2L	19456132	19464586
chr2L	19470107	19472592
chr2L	19476920	19481541
chr2L	19486072	19487629
chr2L	19549304	19549968
chr2L	19550681	19551155
chr2L	19762510	19764121
chr2L	19764293	19766441
chr2L	19770202	19774232
chr2L	20025182	20026235
chr2L	20027557	20028031
chr2L	20689263	20691023
chr2L	20766178	20768788
chr2L	20768851	20774764
chr2L	20776381	20778979
chr2L	20779569	20779954
chr2L	20781095	20785609
chr2L	20851653	20856263
chr2L	21788080	21797439
chr2L	21800879	21802392
chr2L	21803644	21805732
chr2L	21809667	21811144
chr2L	21814004	21814845
chr2L	21825977	21832476
chr2L	21846157	21850092
chr2L	21857185	21858518
chr2L	21859283	21860608
chr2L	21862200	21867543
chr2L	21867683	21874302
chr2L	21874999	21877682
chr2L	21884071	21886214
chr2L	21889472	21891454
chr2L	21892416	21893092
chr2L	21894013	21895780
chr2L	21897539	21900853
chr2L	21903594	21906003
chr2L	21922105	21922782
chr2L	21959064	21962156
chr2L	22023055	22027993
chr2L	22029029	22031489
chr2L	22032651	22035261
chr2L	22108200	22108982
chr2R	5715593	5716786
chr2R	5721026	5722500
chr2R	5725702	5726589
chr2R	5726650	5728489
chr2R	5729372	5730140
chr2R	5733555	5734088
chr2R	5743075	5750288
chr2R	5750463	5752205
chr2R	6450676	6451178
chr2R	6499998	6503521
chr2R	7410912	7411785
chr2R	7417827	7421371
chr2R	7425657	7427059
chr2R	7431203	7432153
chr2R	7758750	7760212
chr2R	7992130	7993461
chr2R	8019943	8021987
chr2R	8022313	8024600
chr2R	8029867	8032180
chr2R	8035183	8036436
chr2R	8046638	8050217
chr2R	8273555	8278219
chr2R	8286338	8290949
chr2R	8314701	8319279
chr2R	8326024	8329261
chr2R	8334275	8339250
chr2R	8341194	8342333
chr2R	8632363	8632808
chr2R	8633250	8634677
chr2R	8967666	8968743
chr2R	9191419	9195301
chr2R	9195367	9201250
chr2R	9214165	9214706
chr2R	9449562	9457990
chr2R	9929516	9930792
chr2R	9978163	9979873
chr2R	9980402	9984726
chr2R	10300490	10301755
chr2R	10334137	10336782
chr2R	10535783	10536768
chr2R	10551845	10553485
chr2R	10554694	10555991
chr2R	11053137	11056406
chr2R	11461759	11468908
chr2R	11468968	11470975
chr2R	11471186	11472695
chr2R	11474425	11476357
chr2R	11477544	11480406
chr2R	11482518	11483648
chr2R	11486504	11491024
chr2R	11492331	11493060
chr2R	11494014	11496461
chr2R	11498704	11499585
chr2R	11499764	11500832
chr2R	11501391	11502910
chr2R	11506730	11508553
chr2R	11510481	11513152
chr2R	11520717	11522309
chr2R	11522459	11525744
chr2R	11526548	11527122
chr2R	11527309	11535163
chr2R	11536834	11538026
chr2R	11564026	11566644
chr2R	11570969	11577209
chr2R	12144417	12145824
chr2R	12882586	12887930
chr2R	12895802	12898048
chr2R	12900571	12903156
chr2R	12910049	12910950
chr2R	12954615	12964356
chr2R	12969663	12974240
chr2R	12980802	12986399
chr2R	12986694	12999427
chr2R	13001833	13027571
chr2R	13030300	13031852
chr2R	13032698	13033339
chr2R	13033697	13037058
chr2R	13037268	13042971
chr2R	13536194	13538349
chr2R	14206411	14214756
chr2R	14278068	14279636
chr2R	14434059	14439453
chr2R	14441767	14445758
chr2R	14445991	14454048
chr2R	14454572	14460405
chr2R	14476193	14478443
chr2R	14797290	14801487
chr2R	14806392	14808965
chr2R	14815045	14818105
chr2R	14825362	14826098
chr2R	14831583	14832786
chr2R	14835137	14838957
chr2R	14839072	14843813
chr2R	15324253	15326420
chr2R	15328037	15333050
chr2R	15828042	15829372
chr2R	15834097	15837695
chr2R	15838576	15839890
chr2R	15840902	15841458
chr2R	15841906	15844167
chr2R	15847278	15847554
chr2R	16396245	16396897
chr2R	16548149	16551075
chr2R	16827936	16829350
chr2R	16868709	16869738
chr2R	17107878	17108598
chr2R	17182411	17186828
chr2R	17196421	17197806
chr2R	17206255	17207114
chr2R	17261659	17262229
chr2R	17800942	17801962
chr2R	17822173	17823552
chr2R	17939272	17941016
chr2R	18254113	18255563
chr2R	18317582	18318451
chr2R	19243139	19244528
chr2R	19244628	19248444
chr2R	19248651	19250048
chr2R	19250812	19254156
chr2R	19256400	19258218
chr2R	19261978	19265411
chr2R	19265563	19266894
chr2R	19267901	19268498
chr2R	19268596	19271624
chr2R	19272526	19277995
chr2R	19279513	19281359
chr2R	19682835	19685047
chr2R	20099148	20100654
chr2R	20884004	20886227
chr2R	20894305	20896478
chr2R	20899026	20901843
chr2R	20901948	20907000
chr2R	20907496	20909277
chr2R	20910556	20911741
chr2R	20912924	20917104
chr2R	20923659	20928120
chr2R	20936702	20938729
chr2R	20940867	20942942
chr2R	20958388	20960442
chr2R	20960613	20962642
chr2R	21361954	21362392
chr2R	21490398	21496536
chr2R	21496641	21498644
chr2R	21498704	21499885
chr2R	21528604	21530870
chr2R	21532344	21534340
chr2R	21804444	21805900
chr2R	21805989	21806671
chr2R	22244231	22247208
chr2R	22252347	22253971
chr2R	22257804	22258450
chr2R	22264282	22266207
chr2R	22270034	22272107
chr2R	22272351	22277079
chr2R	22436247	22439576
chr2R	22857496	22857920
chr2R	22861893	22862537
chr2R	22862597	22865466
chr2R	22868732	22869712
chr2R	22954107	22956982
chr2R	23025857	23026633
chr2R	23028733	23029987
chr2R	23043956	23044694
chr2R	23045609	23046974
chr2R	23054607	23055947
chr2R	23570780	23574213
chr2R	23591137	23592126
chr2R	23617589	23620936
chr2R	23624114	23626193
chr2R	23627968	23628649
chr2R	23629949	23630949
chr2R	23631522	23633101
chr2R	23633248	23634358
chr2R	23634973	23638848
chr2R	23642995	23645606
chr2R	23650180	23650749
chr2R	23660773	23662604
chr2R	23725477	23727311
chr2R	23883829	23885965
chr2R	24146170	24146968
chr2R	24156447	24156834
chr2R	24338060	24338549
chr2R	24341768	24342456
chr2R	24366200	24366755
chr2R	24367028	24367695
chr2R	24369264	24369777
chr2R	24369830	24373258
chr2R	24797305	24798031
chr2R	24799372	24800484
chr2R	24801098	24802813
chr2R	24809996	24816375
chr2R	24822968	24824160
chr2R	24826385	24830067
chr2R	24832033	24834137
chr2R	24840974	24841601
chr2R	24843147	24843553
chr2R	24844475	24848311
chr2R	24861550	24863703
chr2R	24867238	24868472
chr2R	25051548	25052570
chr2R	25059677	25062346
chr2R	25087873	25089553
chr2R	25101457	25103559
chr2R	25109593	25110821
chr2R	25113508	25118684
chr2R	25120199	25121818
chr2R	25128622	25131714
chr2R	25189401	25190077
chr2R	25210908	25212785
chr2R	25212892	25219084
chr2R	25223726	25229440
chr2R	25234918	25238035
chr2R	25243550	25250158
chr2R	25254731	25258460
chr3L	19518	21758
chr3L	370021	373758
chr3L	374353	376920
chr3L	379142	380818
chr3L	383087	383609
chr3L	390111	393688
chr3L	395218	397072
chr3L	429686	435307
chr3L	435466	436862
chr3L	616757	617632
chr3L	626605	627935
chr3L	746371	746824
chr3L	783545	785381
chr3L	804263	805547
chr3L	808474	810270
chr3L	1098408	1099129
chr3L	1100651	1104213
chr3L	1115461	1117451
chr3L	1175672	1181968
chr3L	1183935	1185877
chr3L	1192701	1194886
chr3L	1626862	1627807
chr3L	1703332	1705173
chr3L	1919159	1921542
chr3L	1921892	1923818
chr3L	1926879	1927350
chr3L	1927523	1929618
chr3L	1936561	1937455
chr3L	1939755	1940559
chr3L	3424197	3426625
chr3L	3620773	3623679
chr3L	3625955	3627212
chr3L	3633738	3635007
chr3L	3648746	3650715
chr3L	3657122	3659042
chr3L	3673655	3674238
chr3L	3688950	3691900
chr3L	3707720	3710965
chr3L	3839453	3843247
chr3L	3843301	3847471
chr3L	3856615	3857798
chr3L	3858063	3860068
chr3L	3862085	3862312
chr3L	3862817	3863243
chr3L	3868375	3871260
chr3L	3874511	3876353
chr3L	3889661	3893299
chr3L	4018211	4018855
chr3L	4075693	4078863
chr3L	4079335	4081938
chr3L	4085825	4090499
chr3L	4090665	4091909
chr3L	4186998	4188090
chr3L	4992405	4994339
chr3L	5123957	5127593
chr3L	5437218	5439401
chr3L	5844415	5845244
chr3L	5877011	5880155
chr3L	5880595	5882861
chr3L	5884168	5887617
chr3L	5889409	5896025
chr3L	6102485	6104876
chr3L	6111048	6113492
chr3L	6114624	6119067
chr3L	6122241	6124391
chr3L	6776345	6778869
chr3L	6807879	6809298
chr3L	6812119	6813936
chr3L	6839055	6839587
chr3L	6853701	6856298
chr3L	6865788	6868207
chr3L	6885156	6887751
chr3L	6894757	6898487
chr3L	6905577	6910555
chr3L	6912455	6914017
chr3L	6923248	6924942
chr3L	6926669	6929919
chr3L	6934088	6936747
chr3L	6987058	6990586
chr3L	7289428	7291373
chr3L	7411081	7416938
chr3L	7418978	7420773
chr3L	7421094	7425835
chr3L	7832789	7835923
chr3L	7884039	7885349
chr3L	7941110	7947655
chr3L	7948566	7950210
chr3L	7957016	7959389
chr3L	7959452	7963725
chr3L	7965792	7969963
chr3L	8318052	8318681
chr3L	8534660	8535808
chr3L	8536424	8539619
chr3L	8539931	8541510
chr3L	8646660	8647349
chr3L	9003277	9005222
chr3L	9005471	9006083
chr3L	9018818	9020932
chr3L	9022828	9026064
chr3L	9037354	9037662
chr3L	9039975	9042179
chr3L	9050098	9051416
chr3L	9827938	9829468
chr3L	9963219	9964154
chr3L	10230754	10231534
chr3L	10916252	10919782
chr3L	10948422	10949231
chr3L	10990188	10990780
chr3L	11007226	11007942
chr3L	11008335	11011719
chr3L	11015254	11016580
chr3L	11926200	11926921
chr3L	12284496	12291130
chr3L	12295441	12298100
chr3L	12298342	12313863
chr3L	12319536	12321718
chr3L	12425421	12427932
chr3L	12432736	12434758
chr3L	12442674	12443948
chr3L	12454324	12454942
chr3L	12461914	12463390
chr3L	12466335	12469791
chr3L	12574545	12577686
chr3L	12580050	12582313
chr3L	12584237	12585731
chr3L	12588348	12590798
chr3L	12597717	12598323
chr3L	12601518	12605031
chr3L	12605260	12611663
chr3L	12620254	12623037
chr3L	12627362	12636162
chr3L	12637188	12638958
chr3L	12650601	12653649
chr3L	12655943	12658897
chr3L	12660560	12662309
chr3L	12663589	12664956
chr3L	12668977	12670043
chr3L	12670172	12671697
chr3L	12672434	12674056
chr3L	12684319	12686047
chr3L	12688454	12691245
chr3L	12694124	12694798
chr3L	12695713	12695977
chr3L	12696978	12698640
chr3L	12699144	12702638
chr3L	12705463	12706424
chr3L	12725748	12727602
chr3L	13409158	13410876
chr3L	13666359	13666805
chr3L	14077562	14079265
chr3L	14092671	14094517
chr3L	14103197	14104917
chr3L	14105394	14109507
chr3L	14113861	14114817
chr3L	14117368	14121128
chr3L	14125070	14127529
chr3L	14129384	14134242
chr3L	14137502	14137849
chr3L	14138692	14139636
chr3L	14152217	14153933
chr3L	14154391	14156541
chr3L	14158540	14159566
chr3L	14165787	14166709
chr3L	14170561	14171526
chr3L	14171594	14176129
chr3L	14177176	14181397
chr3L	14181703	14183380
chr3L	14184180	14186364
chr3L	14565195	14566781
chr3L	14568045	14570275
chr3L	14575689	14577246
chr3L	14579655	14584332
chr3L	14595841	14596852
chr3L	14599320	14601121
chr3L	14971425	14972315
chr3L	15843593	15845240
chr3L	17236518	17237691
chr3L	18337072	18338222
chr3L	19635915	19636811
chr3L	19648194	19649258
chr3L	19654135	19657084
chr3L	19657324	19659147
chr3L	19663196	19665277
chr3L	19678587	19680133
chr3L	19680244	19682850
chr3L	19685267	19686121
chr3L	19940688	19942444
chr3L	20561193	20564909
chr3L	20605895	20607089
chr3L	20618911	20621854
chr3L	20627680	20628736
chr3L	20666330	20667015
chr3L	20673570	20675853
chr3L	20675998	20677008
chr3L	20691841	20693127
chr3L	20695229	20696162
chr3L	20788067	20790331
chr3L	20790897	20794298
chr3L	20795536	20797573
chr3L	21190437	21193257
chr3L	21346074	21350226
chr3L	21448764	21451418
chr3L	21457070	21465461
chr3L	21476219	21480658
chr3L	21480890	21484659
chr3L	21578015	21580648
chr3L	21588991	21591609
chr3L	21596557	21599026
chr3L	21601273	21603618
chr3L	21604208	21605615
chr3L	21611370	21612294
chr3L	21807429	21808813
chr3L	22015890	22016720
chr3L	22600702	22603533
chr3L	22627108	22632286
chr3L	22635774	22641015
chr3L	22641207	22645306
chr3L	22645525	22647240
chr3L	22688854	22691459
chr3L	22723140	22725107
chr3L	24721539	24726382
chr3L	24727233	24729710
chr3R	4340075	4342040
chr3R	4345126	4349082
chr3R	4349731	4351989
chr3R	4352482	4357041
chr3R	4357512	4359928
chr3R	4829202	4830242
chr3R	4831458	4832423
chr3R	4834437	4836874
chr3R	4837985	4839401
chr3R	4840256	4844263
chr3R	4844370	4846698
chr3R	4849314	4853405
chr3R	4858825	4860042
chr3R	4861430	4864506
chr3R	4873967	4876336
chr3R	4894800	4898700
chr3R	4901776	4904673
chr3R	5412054	5414444
chr3R	6259475	6260598
chr3R	6497587	6500026
chr3R	6544703	6546362
chr3R	6585534	6586651
chr3R	6666531	6668323
chr3R	6675757	6684500
chr3R	6707265	6709240
chr3R	6724371	6726209
chr3R	6726896	6730003
chr3R	6735215	6737144
chr3R	6739495	6743552
chr3R	6747298	6750046
chr3R	6759251	6763885
chr3R	6764554	6769784
chr3R	6775097	6779794
chr3R	6789230	6792939
chr3R	6804128	6807342
chr3R	6807762	6813221
chr3R	6814926	6820358
chr3R	6822570	6824170
chr3R	6844619	6855726
chr3R	6864304	6865475
chr3R	6872390	6874007
chr3R	6874689	6879454
chr3R	6880244	6883802
chr3R	6888999	6895863
chr3R	6898761	6903076
chr3R	6904780	6906782
chr3R	6907621	6909176
chr3R	6910968	6915604
chr3R	6915956	6917283
chr3R	6922961	6925572
chr3R	6926481	6933223
chr3R	6949618	6955944
chr3R	6957921	6959442
chr3R	6964242	6969446
chr3R	6973047	6974093
chr3R	6986329	6987828
chr3R	6989597	6993511
chr3R	6998843	7010484
chr3R	7020699	7023022
chr3R	7025405	7029498
chr3R	7034925	7036816
chr3R	7036944	7039829
chr3R	7043011	7045547
chr3R	7131868	7137225
chr3R	7138496	7141225
chr3R	7287362	7288566
chr3R	7295643	7297804
chr3R	7305666	7314252
chr3R	7314424	7315935
chr3R	7316841	7317230
chr3R	7332637	7333920
chr3R	7334720	7338588
chr3R	7925507	7929974
chr3R	7932651	7933759
chr3R	7935081	7941784
chr3R	7951501	7952552
chr3R	7960645	7965252
chr3R	7970068	7971740
chr3R	8130074	8133322
chr3R	8133851	8135836
chr3R	8137151	8138765
chr3R	8138823	8139953
chr3R	8144175	8146443
chr3R	8146650	8157975
chr3R	8159115	8160529
chr3R	8169728	8171646
chr3R	8177550	8178151
chr3R	8180251	8181148
chr3R	8181292	8183298
chr3R	8186008	8187639
chr3R	8192881	8194688
chr3R	8197106	8198309
chr3R	8204785	8207918
chr3R	8227421	8229093
chr3R	8275109	8276805
chr3R	8277190	8278867
chr3R	8317418	8318389
chr3R	8328882	8331036
chr3R	8331172	8332282
chr3R	8332748	8333642
chr3R	8334121	8336752
chr3R	8337999	8340627
chr3R	8687777	8690006
chr3R	8693352	8694730
chr3R	8709824	8711861
chr3R	9783221	9784182
chr3R	9814775	9816076
chr3R	10055822	10057172
chr3R	10059961	10061322
chr3R	10064142	10067448
chr3R	10071422	10073146
chr3R	10073308	10077097
chr3R	10354431	10358177
chr3R	10364100	10369482
chr3R	10371020	10375128
chr3R	10418029	10421656
chr3R	10423687	10425901
chr3R	10427438	10430541
chr3R	10431347	10434845
chr3R	10437194	10438648
chr3R	10451396	10454053
chr3R	10455771	10456816
chr3R	10461218	10462491
chr3R	10476406	10482893
chr3R	10490536	10493377
chr3R	10504659	10508618
chr3R	10509688	10511208
chr3R	10515051	10516718
chr3R	10530576	10532034
chr3R	10539500	10542426
chr3R	10562786	10564154
chr3R	10570917	10571705
chr3R	10571758	10572685
chr3R	10579589	10580719
chr3R	10610253	10618981
chr3R	10622175	10624965
chr3R	10625998	10626613
chr3R	10647847	10650068
chr3R	10652263	10653498
chr3R	10656517	10657409
chr3R	10663992	10666547
chr3R	10792011	10793030
chr3R	11253306	11255407
chr3R	11259489	11261782
chr3R	11271246	11274651
chr3R	11277694	11278732
chr3R	11282761	11287408
chr3R	11305651	11307006
chr3R	11311196	11313674
chr3R	11333561	11338324
chr3R	11341305	11342390
chr3R	11370514	11373552
chr3R	12167759	12169532
chr3R	12245428	12247417
chr3R	12264218	12266974
chr3R	12270155	12270847
chr3R	12271565	12280251
chr3R	12282168	12283088
chr3R	12305934	12308343
chr3R	12325652	12333104
chr3R	12334890	12339407
chr3R	12346861	12350332
chr3R	12368961	12370820
chr3R	12895376	12896766
chr3R	13061209	13062071
chr3R	13062461	13069000
chr3R	13103148	13104588
chr3R	13798232	13799566
chr3R	13840906	13842000
chr3R	13842177	13843089
chr3R	13845712	13846954
chr3R	13847244	13850914
chr3R	13856893	13860141
chr3R	13867811	13868766
chr3R	13870054	13871204
chr3R	13873850	13874607
chr3R	13878927	13879490
chr3R	13884748	13885790
chr3R	13887764	13888503
chr3R	13904178	13906353
chr3R	13907085	13907421
chr3R	13913281	13914592
chr3R	13918738	13920522
chr3R	13922129	13925190
chr3R	13926990	13928376
chr3R	13955097	13958399
chr3R	14047527	14053023
chr3R	14092849	14095673
chr3R	14095847	14098190
chr3R	14385411	14386290
chr3R	14576921	14577650
chr3R	14655415	14656790
chr3R	15419128	15421255
chr3R	15984509	15986508
chr3R	15986702	15988465
chr3R	15990030	15990830
chr3R	15993654	15994355
chr3R	15995038	15996321
chr3R	16004343	16007724
chr3R	16007838	16010391
chr3R	16020576	16022760
chr3R	16026350	16031716
chr3R	16037011	16041537
chr3R	16150386	16152271
chr3R	16210887	16212022
chr3R	16246897	16249125
chr3R	16378130	16380033
chr3R	16380410	16381233
chr3R	16385305	16390772
chr3R	16390823	16391277
chr3R	16391553	16392859
chr3R	16393192	16395447
chr3R	16402162	16407766
chr3R	16410060	16411870
chr3R	16412278	16415364
chr3R	16424383	16426883
chr3R	16429210	16430998
chr3R	16660752	16663582
chr3R	16663793	16669324
chr3R	16677975	16680012
chr3R	16681169	16685681
chr3R	16688997	16693662
chr3R	16701533	16707912
chr3R	16714697	16718427
chr3R	16718918	16720070
chr3R	16720224	16722510
chr3R	16731084	16731993
chr3R	16735438	16737753
chr3R	16746831	16750185
chr3R	16754327	16756669
chr3R	16762377	16767149
chr3R	16769636	16770307
chr3R	16776437	16778530
chr3R	16780532	16788930
chr3R	16789791	16790957
chr3R	16795095	16796258
chr3R	16796512	16797745
chr3R	16802734	16805956
chr3R	16810199	16812333
chr3R	16814564	16817691
chr3R	16818031	16819781
chr3R	16822630	16825713
chr3R	16829223	16833108
chr3R	16833392	16835047
chr3R	16837078	16839241
chr3R	16843444	16849438
chr3R	16856219	16861696
chr3R	16866097	16871817
chr3R	16873526	16883933
chr3R	16887266	16898501
chr3R	16902090	16904289
chr3R	16905933	16908653
chr3R	16910784	16914910
chr3R	16915688	16918087
chr3R	16921363	16929162
chr3R	16933291	16936781
chr3R	16938687	16942189
chr3R	16942594	16944349
chr3R	16948100	16950477
chr3R	16952668	16956904
chr3R	16961049	16963308
chr3R	16964299	16976233
chr3R	16976848	16978970
chr3R	16982324	16983941
chr3R	17479217	17481993
chr3R	17546786	17549428
chr3R	17550131	17551992
chr3R	17554258	17556866
chr3R	17568735	17571010
chr3R	17596999	17599506
chr3R	17600534	17604790
chr3R	17635896	17637734
chr3R	17652820	17657198
chr3R	17661907	17664454
chr3R	17667671	17670726
chr3R	17777472	17778058
chr3R	17963762	17965405
chr3R	18042188	18042821
chr3R	18063311	18063944
chr3R	18087589	18090609
chr3R	18107590	18109274
chr3R	18147330	18148228
chr3R	18243056	18247564
chr3R	18259296	18271764
chr3R	18367722	18372293
chr3R	18508869	18516700
chr3R	18519769	18523590
chr3R	18544049	18549122
chr3R	18550205	18553481
chr3R	18564608	18573105
chr3R	19787024	19787574
chr3R	21073163	21075965
chr3R	21076986	21080348
chr3R	21380082	21382088
chr3R	21382409	21383553
chr3R	21384830	21388842
chr3R	21389264	21390858
chr3R	21393163	21394996
chr3R	21401143	21402268
chr3R	21411421	21412981
chr3R	21415175	21415727
chr3R	21419496	21420612
chr3R	21424730	21426802
chr3R	21427478	21429048
chr3R	21430215	21431338
chr3R	21431853	21433504
chr3R	21433764	21436385
chr3R	21438315	21439197
chr3R	21442316	21443234
chr3R	21443679	21450088
chr3R	21456436	21458199
chr3R	21462189	21464199
chr3R	21478542	21479199
chr3R	21490433	21494090
chr3R	21495979	21501024
chr3R	21504580	21507142
chr3R	21509929	21514509
chr3R	21530504	21535106
chr3R	21541148	21544747
chr3R	21556420	21563330
chr3R	21568205	21569174
chr3R	21867696	21868964
chr3R	21895400	21898631
chr3R	22046750	22047927
chr3R	22816033	22817340
chr3R	22942511	22946803
chr3R	22971280	22973525
chr3R	23141304	23143869
chr3R	23146316	23147082
chr3R	23191948	23193060
chr3R	23193212	23193817
chr3R	23195579	23196848
chr3R	23197677	23198223
chr3R	23198505	23208055
chr3R	23209205	23209813
chr3R	23210057	23213116
chr3R	23274734	23275691
chr3R	23277650	23279675
chr3R	23287704	23288764
chr3R	23289669	23290612
chr3R	23291833	23292293
chr3R	23292387	23298105
chr3R	23299967	23301012
chr3R	23313859	23315072
chr3R	23334339	23336822
chr3R	23337955	23338605
chr3R	23729045	23729705
chr3R	23826296	23827463
chr3R	23858586	23860412
chr3R	23999919	24000779
chr3R	24340039	24342992
chr3R	24786841	24789172
chr3R	24789283	24791869
chr3R	24795201	24796522
chr3R	24831804	24833236
chr3R	25074862	25076945
chr3R	25077254	25082374
chr3R	25084376	25085066
chr3R	25086230	25088239
chr3R	25088848	25091495
chr3R	25091620	25096835
chr3R	25135856	25139083
chr3R	25139302	25140945
chr3R	25160280	25163280
chr3R	25182946	25184189
chr3R	25185398	25188986
chr3R	25191395	25193431
chr3R	25770155	25772413
chr3R	26084988	26087059
chr3R	26099124	26102179
chr3R	26664955	26665906
chr3R	26689794	26693099
chr3R	26876371	26877608
chr3R	26878666	26881758
chr3R	27107657	27108177
chr3R	27193694	27194578
chr3R	27298926	27299518
chr3R	28546180	28549402
chr3R	28556723	28557749
chr3R	28572426	28574744
chr3R	28584651	28588829
chr3R	28593176	28596713
chr3R	29268820	29270510
chr3R	29504739	29506363
chr3R	29507828	29510091
chr3R	29518977	29521490
chr3R	29526972	29529414
chr3R	29549667	29554053
chr3R	29554473	29556623
chr3R	29564516	29574453
chr3R	29575904	29580212
chr3R	29581570	29583824
chr3R	29590632	29591973
chr3R	29605009	29608627
chr3R	29680972	29683571
chr3R	29686118	29686707
chr3R	29692793	29695712
chr3R	29696025	29700126
chr3R	29700469	29704661
chr3R	29704817	29706618
chr3R	29707171	29709955
chr3R	29713681	29714654
chr3R	29765524	29766351
chr3R	30025432	30028522
chr3R	30028657	30031472
chr3R	30268478	30274479
chr3R	30607724	30610174
chr3R	30621995	30623833
chr3R	30624198	30625547
chr3R	30654609	30659000
chr3R	30671185	30675199
chr3R	30698788	30701083
chr3R	30701250	30703075
chr3R	30705960	30712843
chr3R	30732282	30738561
chr3R	30745841	30747198
chr3R	30751303	30752563
chr3R	30759897	30763540
chr3R	30763701	30766523
chr3R	30766653	30770130
chr3R	30780620	30784096
chr3R	30899626	30901383
chr3R	30911296	30913351
chr3R	30914036	30915929
chr3R	30926691	30929353
chr3R	30939352	30942671
chr3R	30989781	30991950
chr3R	31011320	31012543
chr3R	31061052	31064079
chr3R	31822253	31823897
chr3R	31936876	31938927
chr3R	32068471	32070125
chr4	56007	57406
chr4	87886	88933
chr4	253618	254873
chr4	377451	378640
chr4	381922	385861
chr4	386008	389978
chr4	395539	397318
chr4	403213	404964
chr4	410804	414109
chr4	415325	420773
chr4	420854	427677
chr4	429437	432300
chr4	486700	493379
chr4	495279	500372
chr4	500560	510964
chr4	517130	518504
chr4	697261	698390
chr4	698940	699364
chr4	699823	704666
chr4	705004	708894
chr4	711992	714010
chr4	714235	716673
chr4	723439	725554
chr4	726756	728793
chr4	806005	815406
chr4	827758	829627
chr4	833126	837593
chr4	838130	839912
chr4	843246	845449
chr4	849816	853603
chr4	964328	966188
chr4	967241	969386
chr4	972195	983836
chr4	985616	992081
chr4	992509	994432
chr4	995506	1005819
chr4	1006021	1007315
chr4	1087190	1089758
chr4	1089822	1091175
chr4	1091768	1107132
chr4	1109419	1111339
chrX	52694	53477
chrX	61577	63898
chrX	71067	73003
chrX	392549	394532
chrX	579889	582371
chrX	582725	583716
chrX	583915	586774
chrX	586947	593828
chrX	593929	595579
chrX	598919	599696
chrX	603084	605648
chrX	605856	608204
chrX	608267	610864
chrX	614047	617067
chrX	683759	686263
chrX	955315	957183
chrX	1242722	1243103
chrX	1251972	1252392
chrX	1261349	1261533
chrX	1276128	1278326
chrX	1280135	1283021
chrX	1283191	1285199
chrX	1334562	1336400
chrX	1417218	1418298
chrX	1523240	1524546
chrX	1530121	1532524
chrX	1532761	1535035
chrX	1536838	1537533
chrX	1539574	1540996
chrX	1549616	1552658
chrX	1575076	1576559
chrX	1666636	1667507
chrX	1696810	1698488
chrX	1718643	1719793
chrX	1721924	1723480
chrX	1726606	1729317
chrX	1732356	1737414
chrX	1748965	1751916
chrX	1753765	1760780
chrX	2010131	2011372
chrX	2050072	2050539
chrX	2121250	2126775
chrX	2127061	2127757
chrX	2130297	2131755
chrX	2133933	2144363
chrX	2254264	2254946
chrX	2524954	2527615
chrX	2531059	2532447
chrX	2540396	2541350
chrX	2544589	2545183
chrX	2678346	2680864
chrX	3250656	3252224
chrX	3518875	3520644
chrX	3528397	3530367
chrX	3530459	3534294
chrX	3568293	3569859
chrX	3794802	3799272
chrX	3804157	3809424
chrX	3847911	3849008
chrX	3971772	3976242
chrX	3981222	3984124
chrX	3995806	3997354
chrX	4000689	4004541
chrX	4018685	4022180
chrX	4023673	4025545
chrX	4032246	4037446
chrX	4039786	4041338
chrX	4054121	4057670
chrX	4060103	4063080
chrX	4074307	4076327
chrX	4087538	4090151
chrX	4090288	4092316
chrX	4149105	4150157
chrX	4377226	4378313
chrX	4385369	4387514
chrX	4408749	4414050
chrX	4423166	4427784
chrX	4429414	4430287
chrX	4437910	4440321
chrX	4440726	4441647
chrX	4444145	4446658
chrX	4483714	4484201
chrX	4487067	4489470
chrX	4505589	4509773
chrX	4526446	4528341
chrX	4559206	4560749
chrX	4560894	4561878
chrX	4577181	4578439
chrX	4584087	4586036
chrX	4586694	4587529
chrX	4588072	4589048
chrX	4591716	4593406
chrX	4594236	4595287
chrX	4595972	4599094
chrX	4610273	4611804
chrX	4616778	4619232
chrX	4645202	4647338
chrX	5545179	5546734
chrX	5561589	5562517
chrX	5576757	5580652
chrX	5590264	5591616
chrX	5689968	5690446
chrX	5862284	5863066
chrX	5994268	5996782
chrX	6000247	6002650
chrX	6012713	6015157
chrX	6025211	6027946
chrX	6029943	6032642
chrX	7110356	7113866
chrX	7115266	7118584
chrX	7160304	7162265
chrX	7162380	7164540
chrX	7192226	7193254
chrX	7194447	7197640
chrX	7204980	7207322
chrX	7209423	7210935
chrX	7225147	7227483
chrX	7254243	7257241
chrX	7258126	7260723
chrX	7269667	7272871
chrX	7274416	7278010
chrX	7366804	7371727
chrX	7382116	7385027
chrX	7443324	7445615
chrX	7489131	7490461
chrX	7512401	7518085
chrX	7526018	7526663
chrX	7527336	7528430
chrX	7530163	7530548
chrX	7561601	7561940
chrX	7605249	7610436
chrX	7611334	7612334
chrX	7612905	7614370
chrX	7631550	7633353
chrX	7650978	7652850
chrX	7766591	7768807
chrX	7796683	7798791
chrX	7805325	7808256
chrX	7809234	7811939
chrX	7878011	7879829
chrX	7990560	7991223
chrX	8259528	8261783
chrX	8455660	8456270
chrX	8618322	8619659
chrX	8623985	8628837
chrX	8636747	8639116
chrX	8639294	8641574
chrX	8643572	8644111
chrX	8647399	8648635
chrX	8648785	8649565
chrX	8649690	8650579
chrX	8673751	8675665
chrX	8690692	8691697
chrX	8692800	8694644
chrX	8724141	8726257
chrX	8759565	8761470
chrX	8779332	8780511
chrX	8800515	8802358
chrX	8804728	8811168
chrX	9287249	9289385
chrX	9289495	9294427
chrX	9294598	9296375
chrX	9297748	9300436
chrX	9303010	9306607
chrX	9311723	9313692
chrX	9688854	9689623
chrX	9690053	9690668
chrX	9691496	9694677
chrX	9695486	9696234
chrX	9698111	9698504
chrX	9708598	9711137
chrX	9728419	9730605
chrX	9733697	9735810
chrX	9744077	9745137
chrX	9749394	9750931
chrX	9751064	9752000
chrX	9770078	9775168
chrX	9864495	9866020
chrX	10602234	10603303
chrX	10814420	10816807
chrX	10821532	10826664
chrX	10829594	10830020
chrX	11417641	11419048
chrX	12090840	12092042
chrX	12614560	12617847
chrX	12620427	12624642
chrX	12624842	12627652
chrX	12985889	12988012
chrX	13902176	13903535
chrX	13954718	13955787
chrX	13988241	13991750
chrX	13992752	13995877
chrX	14097202	14099295
chrX	14101072	14105256
chrX	14113920	14115350
chrX	14148219	14150128
chrX	15349875	15352893
chrX	15354488	15359416
chrX	15600694	15601341
chrX	15620311	15621886
chrX	15622354	15622698
chrX	16126043	16126360
chrX	16129085	16131899
chrX	16138645	16141227
chrX	16146176	16152338
chrX	16153038	16154177
chrX	16156632	16158038
chrX	16180302	16183682
chrX	16188262	16190520
chrX	16200979	16202675
chrX	16208703	16211121
chrX	16212809	16213125
chrX	16215560	16219556
chrX	16256247	16258464
chrX	16258928	16263469
chrX	17308603	17310857
chrX	17327046	17328645
chrX	17329849	17330254
chrX	17337403	17338781
chrX	17361064	17363717
chrX	17368487	17370929
chrX	17387827	17390371
chrX	17395356	17398433
chrX	17398496	17400595
chrX	17407910	17409118
chrX	17410153	17411454
chrX	17412020	17414628
chrX	17414922	17418705
chrX	17755084	17756550
chrX	17759622	17761349
chrX	17767061	17770574
chrX	17790632	17792609
chrX	17796711	17797579
chrX	17804775	17805310
chrX	17813063	17813564
chrX	18253228	18254118
chrX	18275597	18277256
chrX	18309452	18314506
chrX	18386159	18387488
chrX	18533098	18536499
chrX	18571822	18574265
chrX	18578800	18580598
chrX	18583540	18588482
chrX	18590241	18593534
chrX	18602775	18603759
chrX	18617244	18619945
chrX	18630608	18630997
chrX	19425762	19426989
chrX	19531569	19532889
chrX	19537120	19538451
chrX	19541792	19543734
chrX	19545119	19547833
chrX	19888949	19890698
chrX	19987215	19990851
chrX	20062682	20063516
chrX	20173698	20174542
chrX	20329117	20331313
chrX	20535801	20538620
chrX	20546880	20550978
chrX	20556111	20558571
chrX	20577495	20580605
chrX	20582128	20585433
chrX	20612461	20615106
chrX	20687067	20688771
chrX	20712092	20714168
chrX	20731259	20732897
chrX	20739573	20742691
chrX	20744323	20746866
chrX	20755800	20759074
chrX	21068343	21068740
chrX	21440897	21442406
chrX	21442911	21444456
chrX	22382606	22383788
chrX	22592488	22594051
chrX	22758280	22760349
chr2L	5119	9802
chr2L	365995	367023
chr2L	367959	369346
chr2L	369894	371198
chr2L	375138	376733
chr2L	376874	379783
chr2L	383657	384525
chr2L	391631	393740
chr2L	435238	435915
chr2L	494019	495678
chr2L	520871	522667
chr2L	545353	548925
chr2L	576531	578252
chr2L	581656	583430
chr2L	593112	594150
chr2L	594221	597543
chr2L	598118	600594
chr2L	808222	809588
chr2L	918521	920458
chr2L	1637168	1640150
chr2L	1644105	1647187
chr2L	1668292	1671333
chr2L	1943011	1945349
chr2L	1945564	1946668
chr2L	1953336	1955856
chr2L	1960279	1963143
chr2L	1965106	1974361
chr2L	2125661	2127600
chr2L	2162271	2163227
chr2L	2197045	2200208
chr2L	2201349	2204137
chr2L	2390142	2394328
chr2L	2400710	2402423
chr2L	2807318	2808160
chr2L	3533121	3535286
chr2L	3536764	3541542
chr2L	3543264	3550933
chr2L	3553955	3555268
chr2L	3556858	3557867
chr2L	3559110	3560224
chr2L	3561092	3562313
chr2L	3571169	3573171
chr2L	3573610	3576949
chr2L	3580753	3582309
chr2L	3602550	3605390
chr2L	3608784	3612588
chr2L	3615730	3617338
chr2L	3657777	3660123
chr2L	3661395	3663851
chr2L	3667393	3669412
chr2L	3670462	3674389
chr2L	3684331	3686894
chr2L	3817606	3819523
chr2L	3823055	3828461
chr2L	3831648	3834494
chr2L	3834778	3837515
chr2L	3854896	3856280
chr2L	4810289	4813058
chr2L	5036672	5038628
chr2L	5341519	5344379
chr2L	5345012	5348495
chr2L	5361657	5363920
chr2L	5376450	5377263
chr2L	5377810	5379034
chr2L	5389286	5391186
chr2L	5393168	5393899
chr2L	5395749	5398951
chr2L	5399339	5400001
chr2L	5408088	5410935
chr2L	5426726	5427648
chr2L	5437241	5437650
chr2L	5437773	5438457
chr2L	5440368	5442182
chr2L	5457809	5464176
chr2L	5476493	5478373
chr2L	5478580	5479836
chr2L	5482091	5483292
chr2L	5505472	5505984
chr2L	5611065	5613702
chr2L	5621700	5622295
chr2L	5699925	5702231
chr2L	5703077	5704752
chr2L	5706098	5708521
chr2L	5921689	5928075
chr2L	5934221	5935996
chr2L	6204424	6205353
chr2L	6531229	6534245
chr2L	6534961	6537725
chr2L	6539255	6541060
chr2L	6542840	6545916
chr2L	6546059	6549877
chr2L	6808065	6811973
chr2L	6815180	6816980
chr2L	6817037	6818890
chr2L	6819374	6825538
chr2L	6841746	6848272
chr2L	7307229	7308697
chr2L	7339508	7340459
chr2L	7358082	7359819
chr2L	7364717	7366013
chr2L	7375604	7376461
chr2L	8743229	8747409
chr2L	8790336	8791980
chr2L	8796362	8798963
chr2L	8800509	8803611
chr2L	8815694	8817365
chr2L	8818058	8819052
chr2L	8821162	8823594
chr2L	8833379	8836114
chr2L	8838098	8841342
chr2L	8855237	8855850
chr2L	8868643	8870653
chr2L	8871208	8872309
chr2L	9018575	9021621
chr2L	9036857	9038573
chr2L	9070762	9074581
chr2L	9077464	9079026
chr2L	9588742	9589552
chr2L	9607501	9609269
chr2L	9624333	9625193
chr2L	10292900	10297836
chr2L	10347820	10349195
chr2L	10352024	10356912
chr2L	11228532	11229480
chr2L	11253816	11255456
chr2L	11283832	11285020
chr2L	11285812	11286628
chr2L	11292470	11295859
chr2L	11300920	11301904
chr2L	11302400	11304656
chr2L	11329520	11334468
chr2L	11345394	11346884
chr2L	11356815	11360637
chr2L	11378360	11380361
chr2L	11383065	11384517
chr2L	11388094	11389162
chr2L	11392857	11395513
chr2L	11403054	11405400
chr2L	11413369	11414737
chr2L	11445050	11449672
chr2L	11450578	11452148
chr2L	11456847	11458858
chr2L	11486869	11491968
chr2L	11970125	11971344
chr2L	12085312	12086113
chr2L	12365508	12366378
chr2L	12547147	12552029
chr2L	12572098	12572862
chr2L	12574612	12577643
chr2L	12580602	12580970
chr2L	12582175	12583049
chr2L	12595261	12598464
chr2L	12628450	12630977
chr2L	12634124	12636724
chr2L	12637125	12640407
chr2L	12649244	12651857
chr2L	12658856	12661857
chr2L	12670719	12673273
chr2L	12676341	12683758
chr2L	12686962	12690629
chr2L	13485497	13486675
chr2L	15105147	15106305
chr2L	15108878	15110053
chr2L	15275187	15277972
chr2L	15278964	15279998
chr2L	15299189	15300587
chr2L	15318454	15320996
chr2L	15330777	15331724
chr2L	15331915	15334314
chr2L	15339100	15341174
chr2L	15341403	15342646
chr2L	15354568	15359615
chr2L	15370391	15370929
chr2L	15388796	15389605
chr2L	15399749	15401957
chr2L	15415459	15417968
chr2L	15420052	15422519
chr2L	15433918	15437431
chr2L	15441734	15442917
chr2L	15478177	15478660
chr2L	15536118	15538455
chr2L	15912873	15915091
chr2L	16381579	16385345
chr2L	16388108	16392532
chr2L	16398757	16401152
chr2L	16405952	16407147
chr2L	16437144	16444829
chr2L	16448403	16449048
chr2L	16450310	16451525
chr2L	16474584	16475505
chr2L	16478647	16481540
chr2L	16482318	16482772
chr2L	16483015	16487898
chr2L	16867316	16871978
chr2L	16873782	16879799
chr2L	18012227	18013049
chr2L	18085472	18087805
chr2L	18732331	18732871
chr2L	18733048	18735052
chr2L	18735647	18738271
chr2L	18740674	18742451
chr2L	18749242	18749972
chr2L	18778893	18779653
chr2L	18781402	18782875
chr2L	18785001	18786928
chr2L	18787117	18788038
chr2L	18790203	18792286
chr2L	18794713	18798227
chr2L	18823497	18824935
chr2L	18860243	18861614
chr2L	18861851	18865617
chr2L	18874538	18875570
chr2L	18875624	18877810
chr2L	18879646	18883931
chr2L	18890722	18891535
chr2L	18916118	18917311
chr2L	18922772	18927179
chr2L	18932686	18939522
chr2L	19023513	19027228
chr2L	19076286	19078483
chr2L	19081538	19084198
chr2L	19089184	19090384
chr2L	19091785	19096782
chr2L	19110507	19111836
chr2L	19456132	19458133
chr2L	19459669	19464586
chr2L	19476920	19481541
chr2L	19486072	19487629
chr2L	19549304	19549968
chr2L	19762510	19764121
chr2L	19764293	19766441
chr2L	19770202	19774232
chr2L	20025182	20026235
chr2L	20027557	20028031
chr2L	20124812	20126872
chr2L	20689263	20691023
chr2L	20766178	20768788
chr2L	20768851	20770185
chr2L	20771972	20772622
chr2L	20772942	20774764
chr2L	20776381	20778743
chr2L	20779569	20779954
chr2L	20781095	20781650
chr2L	20783984	20785609
chr2L	20852856	20856263
chr2L	21788080	21789452
chr2L	21791172	21793382
chr2L	21793961	21797433
chr2L	21803644	21805656
chr2L	21809739	21811144
chr2L	21814004	21814800
chr2L	21825977	21833886
chr2L	21846414	21850092
chr2L	21862517	21864303
chr2L	21865940	21867030
chr2L	21867683	21870672
chr2L	21874999	21877682
chr2L	21884071	21886214
chr2L	21889472	21891454
chr2L	21892416	21893092
chr2L	21894013	21895780
chr2L	21897539	21900853
chr2L	21903604	21906003
chr2L	22023055	22027993
chr2L	22029029	22031489
chr2L	22032651	22036350
chr2L	22108200	22108982
chr2R	5715593	5716786
chr2R	5721034	5722500
chr2R	5725702	5726589
chr2R	5733555	5734088
chr2R	5743075	5750288
chr2R	5750463	5752205
chr2R	5782220	5783100
chr2R	6500901	6502592
chr2R	7410912	7411785
chr2R	7417827	7421002
chr2R	7425657	7427059
chr2R	7431203	7432153
chr2R	7758750	7760212
chr2R	8022313	8024600
chr2R	8029867	8032180
chr2R	8035183	8036436
chr2R	8037988	8040116
chr2R	8046638	8050217
chr2R	8268298	8271545
chr2R	8273555	8276445
chr2R	8286338	8290949
chr2R	8317157	8319279
chr2R	8328876	8329682
chr2R	8338624	8339250
chr2R	8341194	8342333
chr2R	8632363	8632808
chr2R	8633250	8634249
chr2R	8967666	8968743
chr2R	9193127	9195222
chr2R	9195367	9201716
chr2R	9451188	9454733
chr2R	9456934	9457990
chr2R	9980402	9984726
chr2R	9985803	9986368
chr2R	10334137	10336782
chr2R	10551845	10552840
chr2R	10554694	10555991
chr2R	11462923	11466291
chr2R	11466641	11468702
chr2R	11471186	11472695
chr2R	11474425	11476357
chr2R	11477544	11480406
chr2R	11482518	11483648
chr2R	11486504	11490557
chr2R	11494014	11496461
chr2R	11499764	11500832
chr2R	11501391	11502910
chr2R	11506730	11508553
chr2R	11510481	11513152
chr2R	11520717	11522309
chr2R	11522459	11525744
chr2R	11526548	11527122
chr2R	11527382	11535061
chr2R	11564026	11566644
chr2R	11571673	11574204
chr2R	11574944	11577209
chr2R	12144132	12145824
chr2R	12882586	12887930
chr2R	12889577	12890359
chr2R	12895802	12898048
chr2R	12900571	12903156
chr2R	12910049	12910950
chr2R	12948730	12950446
chr2R	12954779	12962606
chr2R	12962744	12964356
chr2R	12969663	12974240
chr2R	12980802	12984185
chr2R	12986694	12995907
chr2R	13001833	13003738
chr2R	13003977	13008830
chr2R	13010087	13011226
chr2R	13011616	13027571
chr2R	13030300	13031810
chr2R	13032698	13033339
chr2R	13033697	13037058
chr2R	13041027	13042971
chr2R	13536194	13538349
chr2R	14206411	14214182
chr2R	14278068	14279636
chr2R	14434059	14439453
chr2R	14441767	14445758
chr2R	14446091	14454048
chr2R	14457520	14460405
chr2R	14476193	14478443
chr2R	14797290	14798391
chr2R	14798587	14801487
chr2R	14806392	14809559
chr2R	14815045	14818105
chr2R	14825362	14826098
chr2R	14831583	14832786
chr2R	14839431	14841926
chr2R	14920814	14921768
chr2R	15324253	15326420
chr2R	15328037	15333050
chr2R	15827963	15829372
chr2R	15834097	15839890
chr2R	15840902	15841458
chr2R	15841930	15844292
chr2R	16396245	16399049
chr2R	16827936	16829350
chr2R	16868511	16869738
chr2R	17182411	17186828
chr2R	17261659	17262229
chr2R	17800942	17801962
chr2R	17822173	17823552
chr2R	18254415	18255563
chr2R	19244628	19248444
chr2R	19248930	19250048
chr2R	19256400	19258218
chr2R	19261978	19263093
chr2R	19263144	19265411
chr2R	19265563	19266687
chr2R	19267901	19268498
chr2R	19268596	19271624
chr2R	19273420	19277995
chr2R	19279588	19281359
chr2R	19682835	19685047
chr2R	20099148	20100654
chr2R	20894305	20896478
chr2R	20899026	20901843
chr2R	20901948	20907000
chr2R	20907496	20909277
chr2R	20910556	20911741
chr2R	20912924	20917104
chr2R	20923659	20928120
chr2R	20940867	20942942
chr2R	20958388	20960442
chr2R	20960613	20962642
chr2R	21361954	21362401
chr2R	21494817	21495491
chr2R	21496751	21498644
chr2R	21498704	21499885
chr2R	21528604	21530870
chr2R	21532884	21534784
chr2R	21701104	21701960
chr2R	21804444	21806671
chr2R	22089189	22090057
chr2R	22244231	22247208
chr2R	22257804	22258450
chr2R	22264282	22266207
chr2R	22270034	22272012
chr2R	22272351	22277079
chr2R	22436247	22439576
chr2R	22857496	22857920
chr2R	22861893	22862537
chr2R	22863038	22865466
chr2R	22868732	22869712
chr2R	22954271	22956982
chr2R	23024021	23025475
chr2R	23025857	23026633
chr2R	23028733	23029421
chr2R	23043956	23044694
chr2R	23045609	23046974
chr2R	23054607	23055947
chr2R	23570780	23574045
chr2R	23591137	23592126
chr2R	23617589	23620936
chr2R	23624114	23626193
chr2R	23627968	23628649
chr2R	23629949	23631018
chr2R	23631522	23633101
chr2R	23633248	23634358
chr2R	23634973	23638848
chr2R	23650128	23650749
chr2R	23883829	23885965
chr2R	24146170	24146968
chr2R	24156447	24156834
chr2R	24338060	24338549
chr2R	24341768	24342456
chr2R	24347298	24348184
chr2R	24366200	24366755
chr2R	24367028	24367695
chr2R	24369264	24369777
chr2R	24369830	24370883
chr2R	24372691	24373258
chr2R	24687756	24688409
chr2R	24749515	24749829
chr2R	24797305	24798335
chr2R	24799372	24800484
chr2R	24801098	24802813
chr2R	24809996	24816375
chr2R	24822968	24824160
chr2R	24825269	24828208
chr2R	24838349	24839177
chr2R	24840974	24841340
chr2R	24861575	24863703
chr2R	24867238	24868472
chr2R	25051548	25052299
chr2R	25101457	25103559
chr2R	25109593	25110821
chr2R	25113508	25118684
chr2R	25189401	25190077
chr2R	25210908	25212610
chr2R	25212892	25219084
chr2R	25223726	25229440
chr2R	25237275	25238035
chr2R	25243550	25246774
chr2R	25253054	25254600
chr2R	25254731	25258460
chr3L	19518	21758
chr3L	370021	373758
chr3L	374353	376920
chr3L	379142	380818
chr3L	383087	383609
chr3L	432453	435307
chr3L	435614	436862
chr3L	626605	627935
chr3L	684437	685832
chr3L	746371	746824
chr3L	774059	775624
chr3L	783545	785381
chr3L	804395	805547
chr3L	808474	810270
chr3L	1098408	1099129
chr3L	1100700	1104213
chr3L	1115461	1117451
chr3L	1175672	1181968
chr3L	1183935	1185877
chr3L	1192701	1194886
chr3L	1703332	1705173
chr3L	1919159	1921542
chr3L	1921892	1923818
chr3L	1936561	1937455
chr3L	3424197	3426625
chr3L	3620773	3623606
chr3L	3626058	3627107
chr3L	3630965	3631334
chr3L	3633738	3635007
chr3L	3648746	3650715
chr3L	3656188	3659042
chr3L	3673357	3674238
chr3L	3688950	3691910
chr3L	3708448	3710965
chr3L	3839453	3843247
chr3L	3843301	3846600
chr3L	3856615	3857798
chr3L	3858063	3860068
chr3L	3868492	3871260
chr3L	3874511	3876353
chr3L	3889661	3893299
chr3L	4075693	4078863
chr3L	4079335	4081742
chr3L	4086769	4090499
chr3L	4090665	4091909
chr3L	4160786	4161597
chr3L	4991841	4994339
chr3L	5123957	5127593
chr3L	5354723	5355720
chr3L	5413256	5414663
chr3L	5437218	5439900
chr3L	5877322	5879628
chr3L	5880595	5882861
chr3L	5884168	5887617
chr3L	5892880	5896025
[truncated: 813 more rows]

## Sheet: Dam-OGT peaks all
chr2L	39326	42004	-	FBgn0051973
chr2L	128081	129499	+	FBgn0031228
chr2L	128081	129499	-	FBgn0025683
chr2L	178348	180711	+	FBgn0016977
chr2L	336050	337063	+	FBgn0004611
chr2L	433089	437142	+	FBgn0004583
chr2L	481040	486590	+	FBgn0003963
chr2L	494019	496206	+	FBgn0003963
chr2L	502417	503243	+	FBgn0003963
chr2L	552449	553956	-	FBgn0005660
chr2L	552449	553956	-	FBgn0260933
chr2L	559013	559873	+	FBgn0031263
chr2L	559013	559873	-	FBgn0260933
chr2L	755934	758982	+	FBgn0031275
chr2L	840669	841922	-	FBgn0020304
chr2L	842726	843376	-	FBgn0020304
chr2L	843528	846272	-	FBgn0020304
chr2L	864775	868451	-	FBgn0029095
chr2L	864775	868451	-	FBgn0086031
chr2L	1045724	1047894	-	FBgn0031294
chr2L	1116654	1117492	-	FBgn0016926
chr2L	1117718	1119264	-	FBgn0016926
chr2L	1122424	1123712	-	FBgn0016926
chr2L	1124696	1126809	-	FBgn0016926
chr2L	1190282	1190867	+	FBgn0031322
chr2L	1190973	1191403	+	FBgn0031322
chr2L	1263273	1266337	+	FBgn0041097
chr2L	1385003	1389818	-	FBgn0002543
chr2L	1559484	1560482	+	FBgn0261509
chr2L	1668666	1669933	+	FBgn0086758
chr2L	1722377	1723891	-	FBgn0031359
chr2L	1727557	1728544	-	FBgn0000579
chr2L	1733377	1734239	+	FBgn0264494
chr2L	1734784	1737474	+	FBgn0264494
chr2L	1737534	1740133	+	FBgn0264494
chr2L	1902250	1903807	+	FBgn0031374
chr2L	1919689	1921943	+	FBgn0031374
chr2L	1967425	1973714	-	FBgn0031375
chr2L	2085549	2087438	-	FBgn0053516
chr2L	2161235	2161532	-	FBgn0000097
chr2L	2161601	2163227	-	FBgn0000097
chr2L	2163643	2164548	-	FBgn0000097
chr2L	2174522	2177217	-	FBgn0000097
chr2L	2177279	2179534	-	FBgn0000097
chr2L	2188239	2189351	-	FBgn0266828
chr2L	2197045	2201349	-	FBgn0085201
chr2L	2201687	2204591	-	FBgn0051668
chr2L	2362612	2364275	-	FBgn0014010
chr2L	2373576	2374268	-	FBgn0031418
chr2L	2422798	2424118	+	FBgn0031428
chr2L	2451912	2452605	+	FBgn0000490
chr2L	2493024	2495386	+	FBgn0011818
chr2L	2555270	2557992	+	FBgn0264944
chr2L	2748921	2751861	-	FBgn0250906
chr2L	2806134	2808160	+	FBgn0031461
chr2L	2826718	2828130	-	FBgn0031464
chr2L	2862781	2865126	+	FBgn0031474
chr2L	2867450	2869881	+	FBgn0031476
chr2L	2867450	2869881	+	FBgn0031474
chr2L	2867450	2869881	-	FBgn0051694
chr2L	2883598	2885123	-	FBgn0024947
chr2L	3011490	3012842	+	FBgn0031488
chr2L	3017523	3018374	-	FBgn0031489
chr2L	3301179	3303099	-	FBgn0031516
chr2L	3363136	3363960	-	FBgn0085423
chr2L	3364570	3365647	-	FBgn0085423
chr2L	3369006	3370021	-	FBgn0085423
chr2L	3477114	3478697	+	FBgn0264549
chr2L	3477114	3478697	+	FBgn0261560
chr2L	3481787	3482474	-	FBgn0031542
chr2L	3538140	3540769	+	FBgn0265367
chr2L	3538140	3540769	+	FBgn0024244
chr2L	3619195	3619597	+	FBgn0015663
chr2L	3627808	3628830	-	FBgn0000721
chr2L	3642189	3643034	-	FBgn0000721
chr2L	3678424	3679437	+	FBgn0085369
chr2L	3776539	3778041	+	FBgn0004893
chr2L	3778368	3779207	+	FBgn0004893
chr2L	4036578	4037708	+	FBgn0000547
chr2L	4304681	4306814	+	FBgn0010473
chr2L	4413626	4418664	-	FBgn0031602
chr2L	4469851	4471435	-	FBgn0011603
chr2L	4746452	4748451	-	FBgn0031627
chr2L	4759089	4761730	-	FBgn0031627
chr2L	4812445	4815004	+	FBgn0031630
chr2L	4895428	4898774	+	FBgn0031645
chr2L	4999452	5000251	-	FBgn0053113
chr2L	5224093	5227478	-	FBgn0003716
chr2L	5229933	5231707	-	FBgn0003716
chr2L	5232335	5233089	-	FBgn0003716
chr2L	5292103	5295135	+	FBgn0016076
chr2L	5304000	5307057	+	FBgn0016076
chr2L	5437773	5438457	-	FBgn0051647
chr2L	5753269	5754383	+	FBgn0031736
chr2L	5944550	5947912	-	FBgn0266321
chr2L	5944550	5947912	+	FBgn0001128
chr2L	5978138	5979584	-	FBgn0000308
chr2L	5997096	5999343	-	FBgn0031759
chr2L	6078493	6084300	+	FBgn0266450
chr2L	6078493	6084300	+	FBgn0265999
chr2L	6078493	6084300	+	FBgn0031778
chr2L	6204424	6206486	+	FBgn0085409
chr2L	6296534	6299831	+	FBgn0053531
chr2L	6339116	6342542	+	FBgn0015623
chr2L	6347391	6349725	-	FBgn0031800
chr2L	6347391	6349725	-	FBgn0031801
chr2L	6642722	6646194	-	FBgn0051635
chr2L	6940730	6943457	-	FBgn0031871
chr2L	6940730	6943457	-	FBgn0031869
chr2L	7044671	7045624	+	FBgn0262872
chr2L	7115140	7118491	-	FBgn0085407
chr2L	7131788	7132958	-	FBgn0085407
chr2L	7148400	7149051	-	FBgn0085407
chr2L	7373082	7373646	+	FBgn0031903
chr2L	7375799	7376461	+	FBgn0031903
chr2L	7415458	7417117	+	FBgn0028387
chr2L	7439436	7441049	+	FBgn0031914
chr2L	7504813	7505210	-	FBgn0264895
chr2L	7519460	7521107	+	FBgn0264891
chr2L	7519460	7521107	-	FBgn0264895
chr2L	7528464	7529363	-	FBgn0264895
chr2L	7701574	7702531	-	FBgn0041182
chr2L	7809046	7810605	-	FBgn0031952
chr2L	7876019	7876845	-	FBgn0031959
chr2L	7928269	7931865	-	FBgn0085450
chr2L	7972244	7973485	-	FBgn0085450
chr2L	7989739	7990007	-	FBgn0031969
chr2L	7992920	7995134	-	FBgn0031969
chr2L	7992920	7995134	-	FBgn0031970
chr2L	7992920	7995134	+	FBgn0266331
chr2L	8005111	8006228	-	FBgn0031973
chr2L	8007387	8008541	-	FBgn0031974
chr2L	8103688	8105750	+	FBgn0261822
chr2L	8148974	8150371	-	FBgn0031990
chr2L	8148974	8150371	+	FBgn0263256
chr2L	8195924	8196921	-	FBgn0031995
chr2L	8195924	8196921	+	FBgn0264947
chr2L	8237960	8239085	-	FBgn0032006
chr2L	8270706	8271331	-	FBgn0003502
chr2L	8466868	8469948	+	FBgn0262029
chr2L	8470288	8470662	+	FBgn0262029
chr2L	8471598	8472185	+	FBgn0262029
chr2L	8530879	8531768	+	FBgn0028394
chr2L	8531972	8534267	+	FBgn0028394
chr2L	8535179	8536950	+	FBgn0028394
chr2L	8623413	8625333	+	FBgn0011259
chr2L	8627297	8630232	+	FBgn0011259
chr2L	8689909	8691153	-	FBgn0004914
chr2L	8691551	8694020	-	FBgn0004914
chr2L	8700057	8702315	-	FBgn0004914
chr2L	8732050	8733781	-	FBgn0003209
chr2L	8752946	8753425	+	FBgn0032065
chr2L	8922114	8923149	+	FBgn0085427
chr2L	8936815	8938413	+	FBgn0032075
chr2L	9271292	9273128	+	FBgn0267252
chr2L	9334276	9337369	+	FBgn0026439
chr2L	9449653	9451508	+	FBgn0002973
chr2L	9530562	9531781	+	FBgn0032123
chr2L	9612391	9615306	+	FBgn0019809
chr2L	9612391	9615306	+	FBgn0040070
chr2L	9692418	9694484	-	FBgn0000273
chr2L	9703324	9704515	+	FBgn0011207
chr2L	9703324	9704515	-	FBgn0051710
chr2L	9706031	9707608	+	FBgn0011207
chr2L	9728076	9730031	+	FBgn0032139
chr2L	9728076	9730031	-	FBgn0028704
chr2L	9781580	9783692	+	FBgn0032147
chr2L	9906568	9908454	-	FBgn0032156
chr2L	9948398	9949482	+	FBgn0267611
chr2L	10009562	10011025	+	FBgn0011584
chr2L	10320230	10322008	-	FBgn0032218
chr2L	10333871	10335671	+	FBgn0032223
chr2L	10494790	10497506	-	FBgn0086347
chr2L	10510352	10511764	-	FBgn0021953
chr2L	10510352	10511764	-	FBgn0032262
chr2L	10510352	10511764	-	FBgn0266458
chr2L	10514570	10516180	-	FBgn0021953
chr2L	10514570	10516180	-	FBgn0266458
chr2L	10686974	10687617	-	FBgn0032283
chr2L	10771443	10772187	-	FBgn0051869
chr2L	10806648	10807277	-	FBgn0011676
chr2L	10922891	10925898	-	FBgn0261871
chr2L	11045001	11046387	-	FBgn0032330
chr2L	11049219	11049816	-	FBgn0032330
chr2L	11331410	11332983	-	FBgn0265795
chr2L	11842622	11843478	-	FBgn0264815
chr2L	11842622	11843478	+	FBgn0040968
chr2L	11842622	11843478	+	FBgn0259989
chr2L	11850758	11851935	-	FBgn0264815
chr2L	11850758	11851935	+	FBgn0032382
chr2L	12044710	12047034	-	FBgn0032399
chr2L	12044710	12047034	-	FBgn0032400
chr2L	12044710	12047034	-	FBgn0032401
chr2L	12044710	12047034	+	FBgn0265800
chr2L	12097324	12098469	+	FBgn0028707
chr2L	12097324	12098469	+	FBgn0032409
chr2L	12153395	12154169	+	FBgn0051760
chr2L	12176573	12178085	+	FBgn0000114
chr2L	12176573	12178085	-	FBgn0032422
chr2L	12365508	12366378	+	FBgn0262475
chr2L	12369177	12370564	+	FBgn0262475
chr2L	12462604	12464421	-	FBgn0259176
chr2L	12469219	12469892	-	FBgn0259176
chr2L	12719134	12720246	+	FBgn0032456
chr2L	12719134	12720246	-	FBgn0032455
chr2L	13087764	13089998	+	FBgn0265086
chr2L	13204669	13207893	+	FBgn0032482
chr2L	13252249	13253181	+	FBgn0051728
chr2L	13311976	13312784	-	FBgn0264308
chr2L	13424994	13427045	+	FBgn0263354
chr2L	13463977	13467688	+	FBgn0263354
chr2L	13511846	13514055	-	FBgn0023407
chr2L	13514777	13516024	-	FBgn0023407
chr2L	13820401	13821634	+	FBgn0000153
chr2L	13865758	13866416	+	FBgn0028509
chr2L	13865758	13866416	-	FBgn0266142
chr2L	13912496	13914122	+	FBgn0025115
chr2L	13914991	13915429	+	FBgn0032536
chr2L	13977756	13979284	+	FBgn0028940
chr2L	14023021	14024589	-	FBgn0051840
chr2L	14139435	14141643	+	FBgn0028906
chr2L	14298906	14300360	+	FBgn0261563
chr2L	14301054	14301680	+	FBgn0261563
chr2L	14399975	14400997	-	FBgn0004858
chr2L	14405221	14407030	-	FBgn0004858
chr2L	14621956	14622988	-	FBgn0003016
chr2L	14638201	14640410	-	FBgn0003016
chr2L	14950897	14954052	-	FBgn0259213
chr2L	15231348	15232865	-	FBgn0028516
chr2L	15242175	15245796	-	FBgn0028516
chr2L	15515183	15516703	-	FBgn0266158
chr2L	15580420	15581965	+	FBgn0028370
chr2L	15764337	15764994	+	FBgn0028507
chr2L	15851594	15852825	+	FBgn0028903
chr2L	15911100	15915091	-	FBgn0028645
chr2L	15911100	15915091	+	FBgn0266161
chr2L	15911100	15915091	+	FBgn0266162
chr2L	16003300	16004362	+	FBgn0264364
chr2L	16003300	16004362	+	FBgn0028644
chr2L	16003300	16004362	-	FBgn0085196
chr2L	16003300	16004362	-	FBgn0264374
chr2L	16003300	16004362	+	FBgn0045827
chr2L	16052488	16053614	+	FBgn0013433
chr2L	16257058	16258274	+	FBgn0028515
chr2L	16257058	16258274	-	FBgn0024734
chr2L	16266744	16274654	-	FBgn0001994
chr2L	16281437	16286393	-	FBgn0001994
chr2L	16315235	16316825	-	FBgn0000250
chr2L	16318502	16319997	-	FBgn0000250
chr2L	16447235	16449218	-	FBgn0028523
chr2L	16447235	16449218	+	FBgn0020415
chr2L	16450310	16451525	+	FBgn0020415
chr2L	16450310	16451525	+	FBgn0020414
chr2L	16671440	16673125	-	FBgn0032593
chr2L	16833719	16835288	-	FBgn0032612
chr2L	16833719	16835288	-	FBgn0032613
chr2L	16857261	16857840	-	FBgn0051809
chr2L	16887616	16889383	-	FBgn0040985
chr2L	16887616	16889383	+	FBgn0265542
chr2L	16887616	16889383	+	FBgn0261671
chr2L	17254780	17256689	-	FBgn0032629
chr2L	17394474	17396550	+	FBgn0020503
chr2L	17447977	17450440	-	FBgn0260632
chr2L	17605746	17607374	-	FBgn0265585
chr2L	18090947	18091615	-	FBgn0032663
chr2L	18144906	18145882	+	FBgn0265671
chr2L	18144906	18145882	-	FBgn0041184
chr2L	18169350	18171280	-	FBgn0261804
chr2L	18231840	18234123	-	FBgn0261804
chr2L	18496089	18497304	-	FBgn0032683
chr2L	18511242	18511765	+	FBgn0032684
chr2L	18569904	18571020	-	FBgn0085370
chr2L	18654871	18659912	+	FBgn0032694
chr2L	18693330	18695102	-	FBgn0032699
chr2L	18984412	18986263	-	FBgn0032731
chr2L	19023513	19027228	-	FBgn0263838
chr2L	19023513	19027228	+	FBgn0032740
chr2L	19154579	19155214	+	FBgn0010300
chr2L	19341420	19343883	-	FBgn0024245
chr2L	19389199	19390030	-	FBgn0032774
chr2L	19535951	19538613	+	FBgn0053116
chr2L	19535951	19538613	+	FBgn0032803
chr2L	19535951	19538613	+	FBgn0051697
chr2L	19535951	19538613	+	FBgn0267011
chr2L	19547299	19549764	+	FBgn0041180
chr2L	19941841	19943636	+	FBgn0263873
chr2L	20078763	20082105	-	FBgn0263773
chr2L	20078763	20082105	+	FBgn0004374
chr2L	20599411	20601793	-	FBgn0266214
chr2L	20793068	20793859	-	FBgn0250785
chr2L	20859823	20860373	+	FBgn0032897
chr2L	20881238	20882081	-	FBgn0263996
chr2L	20881238	20882081	-	FBgn0032901
chr2L	20883925	20884747	-	FBgn0263996
chr2L	20883925	20884747	-	FBgn0032901
chr2L	20885383	20887255	-	FBgn0263996
chr2L	20885383	20887255	-	FBgn0032901
chr2L	21312881	21313277	+	FBgn0000370
chr2L	21313489	21316885	+	FBgn0000370
chr2L	21920207	21922474	+	FBgn0032968
chr2L	22108200	22108982	+	FBgn0032973
chr2R	5724710	5726589	-	FBgn0000099
chr2R	5805342	5807190	+	FBgn0085414
chr2R	5809986	5811949	+	FBgn0085414
chr2R	5820619	5822805	+	FBgn0085414
chr2R	5998449	5998835	+	FBgn0264959
chr2R	6001309	6002674	+	FBgn0264959
chr2R	6094505	6095615	-	FBgn0000546
chr2R	6148809	6150567	-	FBgn0000546
chr2R	6186218	6189268	-	FBgn0262867
chr2R	6514352	6515865	+	FBgn0086655
chr2R	6624857	6625910	-	FBgn0262736
chr2R	6627543	6631159	-	FBgn0262736
chr2R	6781407	6785122	-	FBgn0000473
chr2R	6781407	6785122	-	FBgn0085421
chr2R	6793504	6795048	-	FBgn0085421
chr2R	6811575	6812946	+	FBgn0265003
chr2R	6863240	6864294	-	FBgn0265935
chr2R	6866913	6868471	-	FBgn0265935
chr2R	6991589	6994571	+	FBgn0050159
chr2R	6991589	6994571	+	FBgn0029508
chr2R	7025246	7026975	+	FBgn0033127
chr2R	7030357	7031558	+	FBgn0033128
chr2R	7111202	7111895	+	FBgn0263934
chr2R	7168382	7172207	+	FBgn0003090
chr2R	7173559	7175065	+	FBgn0003090
chr2R	7249615	7251139	+	FBgn0033153
chr2R	7294706	7295877	+	FBgn0003174
chr2R	7475999	7477873	-	FBgn0010548
chr2R	7533605	7534646	+	FBgn0264294
chr2R	7553401	7555022	+	FBgn0033192
chr2R	7692679	7694799	-	FBgn0033212
chr2R	7730189	7731876	-	FBgn0042135
chr2R	7742803	7746969	-	FBgn0050497
chr2R	7742803	7746969	-	FBgn0266526
chr2R	7755335	7757496	-	FBgn0050497
chr2R	7755335	7757496	-	FBgn0266526
chr2R	7850154	7852684	-	FBgn0085390
chr2R	7902319	7903747	+	FBgn0050377
chr2R	7907624	7909723	+	FBgn0050377
chr2R	8058595	8062500	-	FBgn0033252
chr2R	8091293	8092593	+	FBgn0028561
chr2R	8091293	8092593	+	FBgn0033257
chr2R	8174169	8176502	+	FBgn0053087
chr2R	8182726	8183566	+	FBgn0053087
chr2R	8202755	8207581	-	FBgn0033275
chr2R	8202755	8207581	+	FBgn0053087
chr2R	8238912	8239509	+	FBgn0013726
chr2R	8240123	8241947	+	FBgn0013726
chr2R	8240123	8241947	-	FBgn0265303
chr2R	8256689	8258798	+	FBgn0033277
chr2R	8444764	8446069	+	FBgn0014469
chr2R	8444764	8446069	+	FBgn0262316
chr2R	8462400	8462802	+	FBgn0050359
chr2R	8595880	8598598	-	FBgn0033309
chr2R	8652853	8654501	+	FBgn0003892
chr2R	8670184	8671971	+	FBgn0263120
chr2R	8695794	8696323	-	FBgn0033320
chr2R	8725178	8726655	+	FBgn0005695
chr2R	8734923	8736602	+	FBgn0027585
chr2R	8816276	8818580	+	FBgn0024189
chr2R	8823799	8826262	+	FBgn0024189
chr2R	8852301	8853264	+	FBgn0024189
chr2R	8928069	8928936	-	FBgn0033351
chr2R	8928069	8928936	+	FBgn0033352
chr2R	8944192	8944801	+	FBgn0265301
chr2R	8944192	8944801	-	FBgn0027607
chr2R	8948193	8949632	-	FBgn0033356
chr2R	8948193	8949632	-	FBgn0053199
chr2R	9139098	9139853	+	FBgn0028955
chr2R	9139098	9139853	+	FBgn0265313
chr2R	9157559	9158655	-	FBgn0033387
chr2R	9189591	9191419	-	FBgn0266486
chr2R	9189591	9191419	-	FBgn0033391
chr2R	9307479	9308694	-	FBgn0033402
chr2R	9373622	9376985	-	FBgn0033405
chr2R	9378700	9379541	-	FBgn0033405
chr2R	9437816	9441535	-	FBgn0029092
chr2R	9443062	9444679	-	FBgn0029092
chr2R	9548006	9550307	-	FBgn0033421
chr2R	9633288	9636155	-	FBgn0033438
chr2R	9650824	9652369	-	FBgn0033438
chr2R	9677580	9678780	-	FBgn0033438
chr2R	9806400	9808190	-	FBgn0027589
chr2R	9829760	9830659	-	FBgn0033448
chr2R	9836200	9836583	-	FBgn0033448
chr2R	9856187	9858118	-	FBgn0027580
chr2R	9885712	9887771	+	FBgn0033461
chr2R	9885712	9887771	-	FBgn0033463
chr2R	9918202	9920640	-	FBgn0011656
chr2R	10039502	10041478	-	FBgn0085249
chr2R	10039502	10041478	-	FBgn0033476
chr2R	10052481	10053340	+	FBgn0262169
chr2R	10052481	10053340	-	FBgn0265343
chr2R	10052481	10053340	-	FBgn0265344
chr2R	10056858	10057940	+	FBgn0262169
chr2R	10155513	10156968	-	FBgn0033494
chr2R	10155513	10156968	-	FBgn0265512
chr2R	10172568	10175343	-	FBgn0033494
chr2R	10474831	10478642	+	FBgn0266627
chr2R	10474831	10478642	-	FBgn0261862
chr2R	10533694	10536300	-	FBgn0005630
chr2R	10541326	10543663	-	FBgn0005630
chr2R	10541326	10543663	+	FBgn0266628
chr2R	10568333	10570137	+	FBgn0263102
chr2R	10621056	10622695	+	FBgn0033538
chr2R	10730763	10732293	-	FBgn0033543
chr2R	10730763	10732293	+	FBgn0033544
chr2R	10762576	10767218	-	FBgn0053144
chr2R	11047075	11048294	-	FBgn0040765
chr2R	11061815	11063698	-	FBgn0040765
chr2R	11067339	11068789	-	FBgn0040765
chr2R	11104484	11105518	-	FBgn0040765
chr2R	11196831	11197822	+	FBgn0003396
chr2R	11198147	11199533	+	FBgn0003396
chr2R	11200965	11204258	+	FBgn0003396
chr2R	11205807	11208501	+	FBgn0003396
chr2R	11413405	11414297	-	FBgn0015872
chr2R	11419494	11421027	-	FBgn0015872
chr2R	11494187	11496461	+	FBgn0001269
chr2R	11501467	11502910	+	FBgn0001269
chr2R	11630053	11635395	-	FBgn0033638
chr2R	11641749	11642739	-	FBgn0033639
chr2R	11655658	11656379	+	FBgn0033640
chr2R	11655658	11656379	-	FBgn0044020
chr2R	11657438	11658078	-	FBgn0044020
chr2R	11661081	11661964	-	FBgn0044020
chr2R	11678854	11682365	-	FBgn0044020
chr2R	11678854	11682365	+	FBgn0040491
chr2R	11799440	11800837	+	FBgn0033652
chr2R	11906560	11907347	-	FBgn0033667
chr2R	11947473	11949964	+	FBgn0033668
chr2R	12034258	12036134	+	FBgn0033677
chr2R	12034258	12036134	-	FBgn0262820
chr2R	12046525	12048659	+	FBgn0024732
chr2R	12053187	12056151	+	FBgn0028407
chr2R	12053187	12056151	+	FBgn0265373
chr2R	12095857	12098080	-	FBgn0086677
chr2R	12116707	12117009	-	FBgn0086677
chr2R	12227486	12229382	-	FBgn0033702
chr2R	12261042	12264747	+	FBgn0000253
chr2R	12265335	12267029	+	FBgn0000253
chr2R	12442114	12446775	+	FBgn0033739
chr2R	12534884	12538880	+	FBgn0011592
chr2R	12565214	12567251	+	FBgn0033753
chr2R	12586348	12589032	-	FBgn0022764
chr2R	12599735	12603040	+	FBgn0027356
chr2R	12645979	12646673	-	FBgn0033760
chr2R	12647106	12651319	-	FBgn0033761
chr2R	12647106	12651319	-	FBgn0033760
chr2R	12729567	12731394	+	FBgn0261545
chr2R	12741312	12743173	+	FBgn0261545
chr2R	13193332	13195222	-	FBgn0053182
chr2R	13218081	13219405	-	FBgn0033810
chr2R	13218081	13219405	-	FBgn0033809
chr2R	13389227	13390097	-	FBgn0263774
chr2R	13428726	13429724	-	FBgn0259221
chr2R	13491448	13492525	-	FBgn0033844
chr2R	13498205	13499764	-	FBgn0004638
chr2R	13543605	13544794	-	FBgn0033853
chr2R	13573945	13575070	-	FBgn0261990
chr2R	13573945	13575070	+	FBgn0265496
chr2R	13588577	13590911	-	FBgn0266489
chr2R	13588577	13590911	-	FBgn0027581
chr2R	13704406	13705829	+	FBgn0000633
chr2R	13913374	13914947	-	FBgn0013733
chr2R	13924767	13925822	-	FBgn0013733
chr2R	13931327	13932546	-	FBgn0013733
chr2R	13955864	13958013	-	FBgn0262739
chr2R	13978262	13980167	-	FBgn0033889
chr2R	13989898	13990605	-	FBgn0020620
chr2R	14181979	14184857	+	FBgn0000289
chr2R	14184986	14186290	+	FBgn0050069
chr2R	14265764	14267884	-	FBgn0033919
chr2R	14491355	14493216	+	FBgn0001332
chr2R	14574400	14577263	+	FBgn0265974
chr2R	14574400	14577263	-	FBgn0010397
chr2R	14881167	14882438	-	FBgn0013771
chr2R	14881167	14882438	+	FBgn0033980
chr2R	14898903	14899798	+	FBgn0033982
chr2R	14920814	14923774	-	FBgn0027596
chr2R	14973167	14975223	+	FBgn0033987
chr2R	14981664	14985959	+	FBgn0033988
chr2R	14981664	14985959	-	FBgn0050241
chr2R	15136339	15136617	+	FBgn0015371
chr2R	15474091	15476771	-	FBgn0034021
chr2R	15635598	15637874	+	FBgn0260429
chr2R	15754899	15756837	+	FBgn0050089
chr2R	15768767	15770936	-	FBgn0265991
chr2R	15861490	15863925	-	FBgn0022160
chr2R	15929987	15930809	-	FBgn0034049
chr2R	15952377	15953635	-	FBgn0265045
chr2R	16018221	16018857	+	FBgn0034067
chr2R	16029643	16034968	+	FBgn0034069
chr2R	16029643	16034968	+	FBgn0034070
chr2R	16051934	16056379	+	FBgn0034071
chr2R	16110886	16111816	+	FBgn0034075
chr2R	16128104	16130765	+	FBgn0086676
chr2R	16196756	16197946	+	FBgn0265177
chr2R	16196756	16197946	+	FBgn0262026
chr2R	16196756	16197946	+	FBgn0265178
chr2R	16217156	16219154	-	FBgn0034091
chr2R	16225793	16227525	+	FBgn0034094
chr2R	16225793	16227525	-	FBgn0034093
chr2R	16333619	16334673	-	FBgn0262511
chr2R	16425088	16427374	+	FBgn0264273
chr2R	16501173	16504018	+	FBgn0011260
chr2R	16512227	16515309	+	FBgn0011260
chr2R	16604183	16607267	-	FBgn0034143
chr2R	16783257	16785283	+	FBgn0034158
chr2R	16818080	16819661	-	FBgn0263336
chr2R	16832670	16834110	+	FBgn0263659
chr2R	16880475	16880758	-	FBgn0025833
chr2R	16880475	16880758	+	FBgn0034166
chr2R	17020618	17021647	+	FBgn0263864
chr2R	17025850	17027913	+	FBgn0023172
chr2R	17025850	17027913	-	FBgn0265540
chr2R	17025850	17027913	+	FBgn0263864
chr2R	17053494	17054141	+	FBgn0034184
chr2R	17053494	17054141	+	FBgn0026721
chr2R	17107332	17108781	+	FBgn0050456
chr2R	17110243	17111417	+	FBgn0034194
chr2R	17276847	17278177	+	FBgn0265487
chr2R	17400123	17401129	+	FBgn0010620
chr2R	17435121	17438558	-	FBgn0027506
chr2R	17456920	17460394	+	FBgn0028953
chr2R	17456920	17460394	+	FBgn0024196
chr2R	17675808	17678016	-	FBgn0016059
chr2R	17783390	17786125	-	FBgn0262416
chr2R	18317582	18318451	-	FBgn0010575
chr2R	18412636	18413589	-	FBgn0013983
chr2R	18412636	18413589	+	FBgn0027835
chr2R	18433432	18436197	-	FBgn0050118
chr2R	18442541	18445926	+	FBgn0261477
chr2R	18656982	18657725	-	FBgn0034371
chr2R	18693978	18696163	+	FBgn0262103
chr2R	18696958	18699317	+	FBgn0262103
chr2R	18696958	18699317	+	FBgn0034377
chr2R	18784238	18786700	+	FBgn0034391
chr2R	18799282	18799845	-	FBgn0010651
chr2R	18800780	18801867	-	FBgn0010651
chr2R	18801949	18804948	-	FBgn0010651
chr2R	18805137	18806981	+	FBgn0265661
chr2R	18807059	18807822	+	FBgn0265661
chr2R	18945791	18949905	+	FBgn0034408
chr2R	18958172	18960925	+	FBgn0034408
chr2R	19137024	19138185	+	FBgn0034419
chr2R	19137024	19138185	-	FBgn0034418
chr2R	19145209	19146052	+	FBgn0000578
chr2R	19145209	19146052	+	FBgn0263290
chr2R	19162706	19163534	+	FBgn0000578
chr2R	19233930	19234856	+	FBgn0010434
chr2R	19324082	19325403	-	FBgn0264753
chr2R	19356426	19358359	-	FBgn0264753
chr2R	19356426	19358359	+	FBgn0034436
chr2R	19413845	19416883	-	FBgn0263391
chr2R	19413845	19416883	+	FBgn0028981
chr2R	19413845	19416883	-	FBgn0263464
chr2R	19413845	19416883	+	FBgn0050326
chr2R	19413845	19416883	+	FBgn0050225
chr2R	19466583	19469203	+	FBgn0260934
chr2R	19494352	19495106	-	FBgn0261456
chr2R	19980742	19982316	+	FBgn0034479
chr2R	20251974	20253630	-	FBgn0034490
chr2R	20306379	20308409	-	FBgn0034500
chr2R	20312393	20317446	-	FBgn0034501
chr2R	20312393	20317446	+	FBgn0034502
chr2R	20312393	20317446	+	FBgn0265853
chr2R	20530101	20532350	+	FBgn0265862
chr2R	20557773	20558522	+	FBgn0034520
chr2R	20598864	20603488	+	FBgn0267791
chr2R	20746585	20749427	+	FBgn0040726
chr2R	20753660	20754417	+	FBgn0085231
chr2R	20834760	20835981	-	FBgn0011674
chr2R	20834760	20835981	-	FBgn0016984
chr2R	20880107	20882194	+	FBgn0034558
chr2R	20978091	20978656	-	FBgn0034565
chr2R	21072101	21073611	-	FBgn0034583
chr2R	21079372	21081292	+	FBgn0003748
chr2R	21083771	21084191	+	FBgn0003748
chr2R	21183412	21184206	+	FBgn0003891
chr2R	21249155	21251088	-	FBgn0034606
chr2R	21361954	21362401	-	FBgn0000395
chr2R	21377008	21381703	-	FBgn0000395
chr2R	21496641	21497490	-	FBgn0010470
chr2R	21528189	21530870	+	FBgn0003731
chr2R	21551284	21552304	+	FBgn0003731
chr2R	21611422	21613812	-	FBgn0034639
chr2R	21646044	21650025	+	FBgn0034644
chr2R	21662138	21663223	-	FBgn0034647
chr2R	21662138	21663223	+	FBgn0265961
chr2R	21701104	21701857	+	FBgn0004362
chr2R	21701104	21701857	-	FBgn0010228
chr2R	21800902	21802675	-	FBgn0034661
chr2R	21872961	21874231	+	FBgn0085397
chr2R	21875528	21876326	+	FBgn0085397
chr2R	22004662	22006853	-	FBgn0085399
chr2R	22062194	22063576	+	FBgn0265192
chr2R	22098380	22098908	-	FBgn0034693
chr2R	22112483	22115087	+	FBgn0050280
chr2R	22112483	22115087	-	FBgn0243516
chr2R	22112483	22115087	+	FBgn0050281
chr2R	22115437	22117470	-	FBgn0243516
chr2R	22115437	22117470	+	FBgn0050281
chr2R	22179694	22181639	+	FBgn0034706
chr2R	22179694	22181639	-	FBgn0034705
chr2R	22199016	22201096	-	FBgn0034709
chr2R	22301393	22306730	-	FBgn0034718
chr2R	22310180	22310601	-	FBgn0034718
chr2R	22317975	22321381	+	FBgn0013272
chr2R	22317975	22321381	-	FBgn0265977
chr2R	22321565	22322796	+	FBgn0013272
chr2R	22322866	22324945	+	FBgn0013272
chr2R	22389063	22390841	+	FBgn0034723
chr2R	22397447	22398293	-	FBgn0034724
chr2R	22398393	22400404	-	FBgn0034724
chr2R	22400819	22401682	-	FBgn0034724
chr2R	22478741	22479034	+	FBgn0034733
chr2R	22504424	22510317	-	FBgn0003175
chr2R	22569634	22572548	-	FBgn0260866
chr2R	22622243	22624928	+	FBgn0053143
chr2R	22625275	22627850	+	FBgn0053143
chr2R	22667383	22668723	+	FBgn0050273
chr2R	22667383	22668723	+	FBgn0050269
chr2R	22693163	22693814	-	FBgn0005631
chr2R	22736169	22736937	-	FBgn0028371
chr2R	22737067	22738214	-	FBgn0028371
chr2R	22740501	22741200	-	FBgn0259145
chr2R	22749622	22753756	-	FBgn0259145
chr2R	22896183	22897429	+	FBgn0034797
chr2R	22897985	22900014	+	FBgn0034797
chr2R	22925584	22927479	+	FBgn0261564
chr2R	22928063	22929848	+	FBgn0261564
chr2R	22987537	22989973	+	FBgn0003900
chr2R	23013871	23015682	+	FBgn0003900
chr2R	23013871	23015682	-	FBgn0261705
chr2R	23028733	23029987	+	FBgn0003900
chr2R	23028733	23029987	-	FBgn0261705
chr2R	23463706	23467167	+	FBgn0264339
chr2R	23568027	23569031	+	FBgn0015903
chr2R	23613953	23614738	-	FBgn0034883
chr2R	23613953	23614738	-	FBgn0034885
chr2R	23659548	23662604	+	FBgn0266377
chr2R	23724370	23727711	+	FBgn0034897
chr2R	23817609	23818241	-	FBgn0034909
chr2R	23847773	23849420	-	FBgn0021895
chr2R	23847773	23849420	-	FBgn0034915
chr2R	23871672	23872761	+	FBgn0011236
chr2R	23932115	23933194	-	FBgn0263006
chr2R	23977692	23980625	+	FBgn0005612
chr2R	23980780	23983445	+	FBgn0005612
chr2R	23995720	23996688	-	FBgn0053519
chr2R	24106727	24107601	+	FBgn0034975
chr2R	24106727	24107601	-	FBgn0034976
chr2R	24129820	24132644	-	FBgn0041582
chr2R	24146170	24146968	+	FBgn0019643
chr2R	24156447	24156834	+	FBgn0019643
chr2R	24211238	24214702	-	FBgn0050419
chr2R	24258501	24260254	+	FBgn0034997
chr2R	24366200	24366755	+	FBgn0004101
chr2R	24366200	24366755	-	FBgn0266046
chr2R	24369264	24369777	+	FBgn0004101
chr2R	24369264	24369777	-	FBgn0266046
chr2R	24535194	24536271	-	FBgn0035021
chr2R	24535194	24536271	+	FBgn0035022
chr2R	24551541	24552184	+	FBgn0035023
chr2R	24551541	24552184	-	FBgn0035021
chr2R	24553300	24554385	+	FBgn0035023
chr2R	24553300	24554385	-	FBgn0035021
chr2R	24585449	24588055	+	FBgn0020521
chr2R	24676411	24678366	-	FBgn0035049
chr2R	24680435	24683850	-	FBgn0035049
chr2R	24687756	24690262	-	FBgn0035049
chr2R	24692495	24694884	-	FBgn0035050
chr2R	24717872	24721111	-	FBgn0053988
chr2R	24738722	24741034	-	FBgn0266086
chr2R	24746382	24748318	+	FBgn0050421
chr2R	24749005	24750995	+	FBgn0050421
chr2R	24789007	24790603	-	FBgn0015801
chr2R	24791295	24792008	-	FBgn0015801
chr2R	24882631	24883620	+	FBgn0085442
chr2R	24944337	24946079	+	FBgn0035085
chr2R	24944337	24946079	-	FBgn0035084
chr2R	24954512	24956811	+	FBgn0035086
chr2R	24954512	24956811	-	FBgn0266088
chr2R	24979896	24982839	-	FBgn0010435
chr2R	24983402	24984228	-	FBgn0010435
chr3L	310518	314359	-	FBgn0004373
chr3L	339731	341845	+	FBgn0261985
chr3L	339731	341845	-	FBgn0035132
chr3L	370679	373758	-	FBgn0262139
chr3L	379142	380818	-	FBgn0262139
chr3L	383103	383858	-	FBgn0262139
chr3L	432453	433462	-	FBgn0035139
chr3L	536061	537515	-	FBgn0001316
chr3L	601105	603018	-	FBgn0035146
chr3L	638648	641545	+	FBgn0263039
chr3L	737903	738962	-	FBgn0035160
chr3L	746211	747478	-	FBgn0035160
chr3L	812554	814866	+	FBgn0265730
chr3L	885924	887261	+	FBgn0052479
chr3L	1098408	1099117	-	FBgn0004870
chr3L	1217556	1218008	+	FBgn0264272
chr3L	1279223	1280573	+	FBgn0052333
chr3L	1335778	1336574	+	FBgn0010786
chr3L	1479669	1480762	-	FBgn0020248
chr3L	1589491	1591348	+	FBgn0035237
chr3L	1626424	1627807	-	FBgn0035246
chr3L	1626424	1627807	-	FBgn0035245
chr3L	1662388	1665114	-	FBgn0035253
chr3L	1690330	1691464	+	FBgn0035260
chr3L	1691746	1692252	+	FBgn0035260
chr3L	1726590	1727552	-	FBgn0027594
chr3L	1740230	1743067	+	FBgn0035266
chr3L	1811790	1812857	+	FBgn0027790
chr3L	1815946	1817027	+	FBgn0027790
chr3L	1826858	1827201	-	FBgn0035279
chr3L	1832727	1834681	-	FBgn0035280
chr3L	1967517	1968484	-	FBgn0027547
chr3L	2010662	2012000	-	FBgn0265728
chr3L	2088247	2090314	-	FBgn0086906
chr3L	2088247	2090314	+	FBgn0262107
chr3L	2117958	2118847	-	FBgn0052311
chr3L	2117958	2118847	+	FBgn0267452
chr3L	2254303	2255357	-	FBgn0035321
chr3L	2255685	2258202	+	FBgn0015359
chr3L	2255685	2258202	-	FBgn0035321
chr3L	2329347	2330930	+	FBgn0035331
chr3L	2428123	2429630	+	FBgn0266696
chr3L	2467795	2469326	+	FBgn0266696
chr3L	2478292	2481306	+	FBgn0266696
chr3L	2478292	2481306	-	FBgn0035344
chr3L	2488147	2491534	+	FBgn0266696
chr3L	2488147	2491534	+	FBgn0035346
chr3L	2770794	2771374	-	FBgn0035371
chr3L	2869885	2870440	-	FBgn0263392
chr3L	3080668	3083748	+	FBgn0035397
chr3L	3178733	3180352	+	FBgn0035411
chr3L	3306741	3308990	+	FBgn0035432
chr3L	3309836	3312057	+	FBgn0035432
chr3L	3410767	3412747	-	FBgn0014388
chr3L	3410767	3412747	-	FBgn0262260
chr3L	3413400	3415804	-	FBgn0014388
chr3L	3415892	3416980	-	FBgn0014388
chr3L	3487967	3488900	+	FBgn0259224
chr3L	3625955	3627212	+	FBgn0263239
chr3L	3646096	3648612	+	FBgn0263239
chr3L	3688950	3689971	+	FBgn0263495
chr3L	3748781	3752297	-	FBgn0052264
chr3L	4044068	4046711	+	FBgn0035490
chr3L	4068012	4070100	-	FBgn0024179
chr3L	4068012	4070100	+	FBgn0052259
chr3L	4096163	4097054	-	FBgn0035497
chr3L	4103852	4104309	+	FBgn0035498
chr3L	4145102	4146464	+	FBgn0052260
chr3L	4148691	4148959	+	FBgn0035501
chr3L	4186998	4189057	+	FBgn0040696
chr3L	4186998	4189057	-	FBgn0035505
chr3L	4186998	4189057	+	FBgn0003710
chr3L	4229076	4229708	-	FBgn0001257
chr3L	4231718	4233372	-	FBgn0001257
chr3L	4233943	4234558	-	FBgn0001257
chr3L	4235063	4235475	-	FBgn0001257
chr3L	4336243	4338180	-	FBgn0035533
chr3L	4352812	4354309	-	FBgn0035533
chr3L	4410384	4414151	+	FBgn0035542
chr3L	4415800	4416646	+	FBgn0035542
chr3L	4515029	4517261	-	FBgn0014073
chr3L	5098665	5103645	-	FBgn0054047
chr3L	5349771	5350557	-	FBgn0016031
chr3L	5354347	5355720	-	FBgn0016031
chr3L	5569503	5570642	-	FBgn0015766
chr3L	5574367	5577478	-	FBgn0015766
chr3L	5630461	5631076	+	FBgn0035625
chr3L	5640543	5642145	+	FBgn0035625
chr3L	5732189	5734917	+	FBgn0085447
chr3L	5800220	5802408	-	FBgn0015806
chr3L	6022439	6024459	+	FBgn0052406
chr3L	6256402	6256919	-	FBgn0035696
chr3L	6263396	6263875	-	FBgn0265715
chr3L	6346150	6347703	-	FBgn0035699
chr3L	6439054	6439830	+	FBgn0261801
chr3L	6663218	6664460	-	FBgn0035709
chr3L	7002775	7003547	+	FBgn0260660
chr3L	7030618	7032764	+	FBgn0260660
chr3L	7076375	7078019	-	FBgn0035733
chr3L	7094782	7095441	+	FBgn0053556
chr3L	7097158	7099520	+	FBgn0053556
chr3L	7101626	7102748	+	FBgn0053556
chr3L	7172675	7177263	-	FBgn0265296
chr3L	7183688	7184819	-	FBgn0265296
chr3L	7358779	7360173	-	FBgn0035770
chr3L	7432384	7434101	+	FBgn0259935
chr3L	7432384	7434101	-	FBgn0014011
chr3L	7521069	7521768	+	FBgn0052372
chr3L	7633828	7634715	+	FBgn0035802
chr3L	7719357	7720207	+	FBgn0052373
chr3L	7719357	7720207	-	FBgn0035812
chr3L	7719357	7720207	+	FBgn0035811
chr3L	7734466	7735345	+	FBgn0052373
chr3L	7734466	7735345	-	FBgn0035815
chr3L	7771759	7773011	-	FBgn0023076
chr3L	7775221	7776085	-	FBgn0023076
chr3L	7782936	7783943	-	FBgn0052369
chr3L	7875947	7879345	+	FBgn0052365
chr3L	8087079	8087944	+	FBgn0262579
chr3L	8087079	8087944	-	FBgn0035833
chr3L	8117410	8117891	+	FBgn0026252
chr3L	8272844	8275251	+	FBgn0263219
chr3L	8359558	8360723	-	FBgn0001248
chr3L	8459343	8461611	+	FBgn0010825
chr3L	8525625	8527615	+	FBgn0024236
chr3L	8528428	8530266	+	FBgn0024236
chr3L	8675110	8675892	+	FBgn0001168
chr3L	8691010	8693335	+	FBgn0265719
chr3L	8863621	8867505	+	FBgn0263930
chr3L	9060667	9061481	-	FBgn0000116
chr3L	9334396	9335669	+	FBgn0035975
chr3L	9338278	9342389	+	FBgn0035976
chr3L	9338278	9342389	+	FBgn0035975
chr3L	9347727	9348878	+	FBgn0035976
chr3L	9383919	9384720	+	FBgn0001226
chr3L	9419109	9421945	-	FBgn0035989
chr3L	9422945	9424241	-	FBgn0035989
chr3L	9422945	9424241	+	FBgn0023129
chr3L	9455324	9456874	-	FBgn0035997
chr3L	9455324	9456874	+	FBgn0267533
chr3L	9455324	9456874	+	FBgn0035999
chr3L	9455324	9456874	-	FBgn0035998
chr3L	9497499	9500176	-	FBgn0036007
chr3L	9798282	9799730	+	FBgn0044051
chr3L	9798282	9799730	+	FBgn0036046
chr3L	9798282	9799730	+	FBgn0044328
chr3L	9802015	9804122	-	FBgn0044049
chr3L	9802015	9804122	+	FBgn0044328
chr3L	9802015	9804122	-	FBgn0044050
chr3L	9828099	9829468	+	FBgn0264489
chr3L	9851516	9852871	-	FBgn0004390
chr3L	9915944	9917690	+	FBgn0085385
chr3L	9963219	9964439	+	FBgn0085385
chr3L	10033492	10036155	+	FBgn0040823
chr3L	10201494	10202698	-	FBgn0000451
chr3L	10642484	10644443	+	FBgn0036093
chr3L	10642484	10644443	-	FBgn0052066
chr3L	10642484	10644443	+	FBgn0036094
chr3L	10682415	10684482	+	FBgn0010762
chr3L	10823672	10826591	+	FBgn0266781
chr3L	10864995	10867427	+	FBgn0026160
chr3L	10896496	10898772	-	FBgn0036111
chr3L	11145154	11146106	+	FBgn0052082
chr3L	11147929	11149399	+	FBgn0052082
chr3L	11154631	11158116	+	FBgn0052082
chr3L	11173315	11174745	+	FBgn0036143
chr3L	11219713	11220308	+	FBgn0261553
chr3L	11289193	11292060	-	FBgn0036152
chr3L	11348418	11349752	-	FBgn0266786
chr3L	11532500	11533286	-	FBgn0259481
chr3L	11637000	11639042	+	FBgn0052091
chr3L	11711749	11712601	-	FBgn0040817
chr3L	11777389	11778794	+	FBgn0036205
chr3L	11777389	11778794	-	FBgn0015278
chr3L	12188055	12189127	+	FBgn0000592
chr3L	12273821	12274703	-	FBgn0036272
chr3L	12406941	12407895	-	FBgn0052103
chr3L	12408262	12410524	-	FBgn0052103
chr3L	12472083	12472858	+	FBgn0036286
chr3L	12490433	12491797	-	FBgn0036288
chr3L	12490433	12491797	+	FBgn0267241
chr3L	12705463	12706424	+	FBgn0014343
chr3L	12839337	12839806	-	FBgn0036316
chr3L	12997179	12999589	+	FBgn0036329
chr3L	13274049	13274730	+	FBgn0023095
chr3L	13450941	13452316	+	FBgn0036368
chr3L	13475646	13478359	+	FBgn0086708
chr3L	13497259	13498378	+	FBgn0036373
chr3L	13896512	13897512	-	FBgn0264006
chr3L	13917210	13918861	-	FBgn0026376
chr3L	13945414	13946519	+	FBgn0052137
chr3L	13958556	13959617	+	FBgn0052137
chr3L	13982933	13984404	-	FBgn0036391
chr3L	14055576	14056243	+	FBgn0267795
chr3L	14058708	14060237	+	FBgn0267795
chr3L	14060549	14064435	+	FBgn0267795
chr3L	14077056	14079627	+	FBgn0005592
chr3L	14200826	14201314	+	FBgn0013718
chr3L	14623293	14627690	+	FBgn0036433
chr3L	14784875	14787097	-	FBgn0036449
chr3L	14784875	14787097	+	FBgn0036450
chr3L	14992910	14994016	+	FBgn0036461
chr3L	15006991	15007920	-	FBgn0036463
chr3L	15008549	15010163	-	FBgn0036463
chr3L	15098459	15100124	+	FBgn0266452
chr3L	15098459	15100124	-	FBgn0264703
chr3L	15098459	15100124	-	FBgn0264704
chr3L	15500089	15502973	+	FBgn0036501
chr3L	15500089	15502973	+	FBgn0036500
chr3L	15534232	15535881	+	FBgn0004396
chr3L	15595675	15598418	+	FBgn0036518
chr3L	15696331	15698381	-	FBgn0041160
chr3L	16000916	16004055	-	FBgn0036556
chr3L	16037679	16038558	-	FBgn0260635
chr3L	16041093	16042613	-	FBgn0260635
chr3L	16041093	16042613	+	FBgn0267549
chr3L	16044437	16048539	-	FBgn0260635
chr3L	16085385	16086474	-	FBgn0263602
chr3L	16090560	16092688	+	FBgn0036566
chr3L	16094936	16095601	+	FBgn0036566
chr3L	16148564	16150359	-	FBgn0036576
chr3L	16151356	16151946	-	FBgn0036576
chr3L	16152761	16158362	-	FBgn0036576
chr3L	16374058	16374347	-	FBgn0036621
chr3L	16374461	16375036	-	FBgn0036621
chr3L	16448254	16448783	+	FBgn0053158
chr3L	16448254	16448783	-	FBgn0261799
chr3L	16517493	16518537	-	FBgn0263131
chr3L	16565195	16565742	-	FBgn0026061
chr3L	16568085	16570060	-	FBgn0026061
chr3L	16633856	16635921	-	FBgn0000017
chr3L	16706983	16709112	-	FBgn0063485
chr3L	16706983	16709112	-	FBgn0264605
chr3L	16799833	16802030	-	FBgn0036663
chr3L	17000025	17000938	-	FBgn0036684
chr3L	17031228	17032053	-	FBgn0036690
chr3L	17052085	17053797	+	FBgn0036697
chr3L	17443808	17445180	+	FBgn0036725
chr3L	17590296	17591498	-	FBgn0000567
chr3L	17603694	17608158	-	FBgn0000567
chr3L	17623011	17624133	+	FBgn0036741
chr3L	17625011	17626295	+	FBgn0036741
chr3L	17629865	17637011	+	FBgn0036741
chr3L	17629865	17637011	+	FBgn0036742
chr3L	17629865	17637011	+	FBgn0265759
chr3L	17629865	17637011	-	FBgn0265760
chr3L	17637772	17638934	-	FBgn0004401
chr3L	17637772	17638934	+	FBgn0036742
chr3L	17903052	17903547	-	FBgn0036770
chr3L	17943114	17943699	+	FBgn0267794
chr3L	17957541	17959034	-	FBgn0000568
chr3L	17962713	17966884	-	FBgn0000568
chr3L	17975341	17978366	-	FBgn0000568
chr3L	18145221	18146228	+	FBgn0020300
chr3L	18175084	18177822	-	FBgn0003997
chr3L	18179294	18180278	-	FBgn0003997
chr3L	18527272	18528109	+	FBgn0052198
chr3L	18613550	18616518	-	FBgn0036799
chr3L	18613550	18616518	-	FBgn0036793
chr3L	18613550	18616518	+	FBgn0052199
chr3L	18770885	18772712	-	FBgn0267601
chr3L	18770885	18772712	-	FBgn0001078
chr3L	18800193	18801606	-	FBgn0267601
chr3L	18800193	18801606	-	FBgn0001078
chr3L	18824164	18825921	+	FBgn0000261
chr3L	18844849	18846109	-	FBgn0036816
chr3L	18950257	18952455	+	FBgn0036834
chr3L	18977640	18981334	+	FBgn0267249
chr3L	19136453	19137119	-	FBgn0036851
chr3L	19158174	19159337	-	FBgn0016797
chr3L	19167000	19167906	-	FBgn0016797
chr3L	19350432	19352683	-	FBgn0052206
chr3L	19562596	19563935	+	FBgn0267576
chr3L	19565610	19566302	+	FBgn0267576
chr3L	19606070	19607487	+	FBgn0036891
chr3L	19606070	19607487	-	FBgn0020277
chr3L	19812012	19813911	-	FBgn0023094
chr3L	19812012	19813911	-	FBgn0036910
chr3L	19895319	19898356	-	FBgn0014037
chr3L	19895319	19898356	-	FBgn0262519
chr3L	19895319	19898356	-	FBgn0052218
chr3L	19899770	19901141	-	FBgn0014037
chr3L	19899770	19901141	-	FBgn0262519
chr3L	19906428	19907823	-	FBgn0014037
chr3L	19906428	19907823	-	FBgn0262519
chr3L	19940688	19942444	+	FBgn0004852
chr3L	20103184	20105768	+	FBgn0265890
chr3L	20103184	20105768	-	FBgn0036935
chr3L	20127317	20128274	-	FBgn0036939
chr3L	20151520	20153029	-	FBgn0261556
chr3L	20195381	20198328	-	FBgn0261556
chr3L	20235759	20236574	-	FBgn0036958
chr3L	20316934	20317966	-	FBgn0264467
chr3L	20316934	20317966	+	FBgn0262057
chr3L	20352873	20354347	+	FBgn0036975
chr3L	20352873	20354347	+	FBgn0036974
chr3L	20367099	20367674	+	FBgn0001259
chr3L	20385981	20387316	+	FBgn0011205
chr3L	20447686	20449169	+	FBgn0036993
chr3L	20488915	20491099	-	FBgn0037000
chr3L	20492952	20494177	+	FBgn0037001
chr3L	20492952	20494177	-	FBgn0037000
chr3L	20516717	20519737	-	FBgn0037007
chr3L	20516717	20519737	-	FBgn0037008
chr3L	20619317	20621854	-	FBgn0001323
chr3L	20695229	20696162	-	FBgn0001320
chr3L	20827975	20830294	+	FBgn0259243
chr3L	20944515	20946874	-	FBgn0011591
chr3L	21024767	21027220	-	FBgn0003415
chr3L	21057847	21059543	+	FBgn0026179
chr3L	21062786	21063136	+	FBgn0026179
chr3L	21134868	21135950	-	FBgn0037051
chr3L	21174628	21175225	+	FBgn0041607
chr3L	21174628	21175225	+	FBgn0021760
chr3L	21252741	21253800	+	FBgn0004865
chr3L	21265663	21266197	+	FBgn0004865
chr3L	21596949	21599026	+	FBgn0261953
chr3L	21611370	21612634	+	FBgn0261953
chr3L	21636292	21638010	+	FBgn0043783
chr3L	21636292	21638010	-	FBgn0267617
chr3L	21740467	21741536	+	FBgn0037128
chr3L	22046128	22049274	+	FBgn0004514
chr3L	22071134	22071739	-	FBgn0027532
chr3L	22079809	22081446	+	FBgn0259973
chr3L	22219351	22221779	+	FBgn0037153
chr3L	22325048	22328904	-	FBgn0004449
chr3L	22333576	22336924	-	FBgn0004449
chr3L	22379537	22380212	-	FBgn0004449
chr3L	22379537	22380212	-	FBgn0267624
chr3L	22465495	22466398	+	FBgn0037164
chr3L	22470495	22472237	+	FBgn0037166
chr3L	22773929	22775728	+	FBgn0052451
chr3L	22822615	22824319	-	FBgn0027339
chr3R	4174426	4176672	+	FBgn0037213
chr3R	4333531	4333853	-	FBgn0027866
chr3R	4390215	4392106	+	FBgn0037241
chr3R	4390215	4392106	-	FBgn0086608
chr3R	4401299	4402193	-	FBgn0086605
chr3R	4401299	4402193	+	FBgn0037244
chr3R	4451385	4452352	-	FBgn0051522
chr3R	4459200	4461907	-	FBgn0051522
chr3R	4462343	4462903	-	FBgn0051522
chr3R	4468570	4471622	-	FBgn0051523
chr3R	4911955	4915180	+	FBgn0265082
chr3R	4946350	4948066	-	FBgn0004183
chr3R	4946350	4948066	+	FBgn0266698
chr3R	4954843	4956032	-	FBgn0037288
chr3R	5015777	5017111	+	FBgn0267145
chr3R	5208079	5211337	-	FBgn0259212
chr3R	5261671	5264655	-	FBgn0037307
chr3R	5261671	5264655	+	FBgn0264785
chr3R	5261671	5264655	-	FBgn0267443
chr3R	5288396	5289733	-	FBgn0013576
chr3R	5300291	5304452	+	FBgn0037310
chr3R	5300291	5304452	-	FBgn0013576
chr3R	5307791	5309786	-	FBgn0013576
chr3R	5317108	5320136	-	FBgn0013576
chr3R	5441220	5442281	+	FBgn0037326
chr3R	5516780	5518075	+	FBgn0010051
chr3R	5516780	5518075	-	FBgn0010399
chr3R	5658783	5660014	-	FBgn0037360
chr3R	5658783	5660014	+	FBgn0264902
chr3R	5672392	5674097	+	FBgn0037363
chr3R	5832764	5835811	+	FBgn0037386
chr3R	5832764	5835811	-	FBgn0266702
chr3R	5837946	5841622	+	FBgn0037386
chr3R	5837946	5841622	+	FBgn0037387
chr3R	5842195	5845713	+	FBgn0037387
chr3R	5890372	5893276	-	FBgn0083949
chr3R	5890372	5893276	+	FBgn0267399
chr3R	5907015	5911176	-	FBgn0083949
chr3R	6400185	6403411	-	FBgn0037443
chr3R	6432293	6435081	+	FBgn0264495
chr3R	7111626	7113374	-	FBgn0014863
chr3R	7111626	7113374	-	FBgn0261238
chr3R	7175731	7176889	+	FBgn0002306
chr3R	7512867	7513196	-	FBgn0015576
chr3R	7522147	7524397	-	FBgn0015575
chr3R	7604775	7605937	-	FBgn0083963
chr3R	7630519	7634288	-	FBgn0083963
chr3R	8108660	8109756	+	FBgn0243512
chr3R	8111146	8114433	+	FBgn0243512
chr3R	8111146	8114433	-	FBgn0265419
chr3R	8116099	8117164	+	FBgn0243512
chr3R	8150160	8151572	-	FBgn0001138
chr3R	8169728	8171531	-	FBgn0001138
chr3R	8177550	8178151	-	FBgn0001138
chr3R	8352535	8354158	+	FBgn0261108
chr3R	8591403	8593646	+	FBgn0261929
chr3R	8739646	8742557	-	FBgn0037623
chr3R	8764492	8769212	-	FBgn0037625
chr3R	8764492	8769212	-	FBgn0083971
chr3R	8789185	8791813	-	FBgn0261015
chr3R	8789185	8791813	-	FBgn0046874
chr3R	8821680	8822307	+	FBgn0040532
chr3R	8881940	8882524	-	FBgn0262614
chr3R	8938856	8940733	+	FBgn0037643
chr3R	9047522	9049258	-	FBgn0010222
chr3R	9047522	9049258	+	FBgn0028708
chr3R	9047522	9049258	-	FBgn0014018
chr3R	9117533	9119455	-	FBgn0003165
chr3R	9226774	9227414	-	FBgn0003165
chr3R	9344155	9344838	+	FBgn0266410
chr3R	9370015	9371490	-	FBgn0000723
chr3R	9436195	9436871	+	FBgn0261552
chr3R	9502037	9502552	-	FBgn0014380
chr3R	9527947	9529488	-	FBgn0000244
chr3R	9573862	9575107	-	FBgn0027338
chr3R	9573862	9575107	-	FBgn0037715
chr3R	9769229	9770287	+	FBgn0037747
chr3R	9865116	9867738	-	FBgn0037766
chr3R	9876063	9878493	-	FBgn0266389
chr3R	9876063	9878493	+	FBgn0267336
chr3R	9927190	9932966	+	FBgn0267336
chr3R	9943631	9951191	+	FBgn0267336
chr3R	9951366	9951856	+	FBgn0267336
chr3R	9963420	9964397	+	FBgn0267336
chr3R	10082707	10086039	+	FBgn0266414
chr3R	10152867	10154441	+	FBgn0086359
chr3R	10237152	10241884	+	FBgn0261928
chr3R	10377576	10381339	-	FBgn0020379
chr3R	10391933	10392396	+	FBgn0259938
chr3R	10393354	10395237	+	FBgn0259938
chr3R	10530576	10532034	-	FBgn0001235
chr3R	10561978	10564154	-	FBgn0001235
chr3R	10792368	10793030	+	FBgn0037835
chr3R	10974005	10975526	+	FBgn0083950
chr3R	11045113	11046302	+	FBgn0083950
chr3R	11169230	11171118	-	FBgn0026315
chr3R	11169230	11171118	-	FBgn0026314
chr3R	11202903	11203443	+	FBgn0261808
chr3R	11616015	11617665	-	FBgn0051363
chr3R	11636774	11641185	-	FBgn0262081
chr3R	11636774	11641185	+	FBgn0264986
chr3R	11657170	11658899	+	FBgn0259227
chr3R	11670834	11672695	+	FBgn0259227
chr3R	11683427	11684797	-	FBgn0037935
chr3R	11683427	11684797	-	FBgn0037934
chr3R	11712172	11713295	+	FBgn0037940
chr3R	11756622	11764401	-	FBgn0017581
chr3R	11769693	11775472	-	FBgn0265276
chr3R	11779645	11780775	+	FBgn0267155
chr3R	11812469	11816112	-	FBgn0051116
chr3R	11812469	11816112	-	FBgn0259139
chr3R	11886665	11887573	+	FBgn0051368
chr3R	11886665	11887573	-	FBgn0037960
chr3R	11988996	11990346	-	FBgn0260745
chr3R	12003122	12004939	+	FBgn0260746
chr3R	12003122	12004939	-	FBgn0037976
chr3R	12369650	12371059	+	FBgn0267679
chr3R	12584793	12588037	-	FBgn0038063
chr3R	12616145	12619266	-	FBgn0266247
chr3R	12642245	12644106	-	FBgn0038070
chr3R	12700379	12701598	+	FBgn0016693
chr3R	13037899	13039782	+	FBgn0038113
chr3R	13037899	13039782	+	FBgn0003308
chr3R	13244040	13246010	-	FBgn0000024
chr3R	13260407	13260759	+	FBgn0040551
chr3R	13279240	13279754	+	FBgn0038130
chr3R	13279854	13282944	+	FBgn0038130
chr3R	13645841	13648945	+	FBgn0015778
chr3R	13645841	13648945	-	FBgn0263396
chr3R	13684082	13687522	+	FBgn0024555
chr3R	13684082	13687522	-	FBgn0038168
chr3R	13764146	13765606	+	FBgn0085412
chr3R	13813950	13814683	+	FBgn0259733
chr3R	13813950	13814683	+	FBgn0259730
chr3R	13813950	13814683	+	FBgn0259732
chr3R	13813950	13814683	+	FBgn0259731
chr3R	13814805	13815479	+	FBgn0263650
chr3R	14027916	14029360	-	FBgn0264493
chr3R	14027916	14029360	+	FBgn0038194
chr3R	14057098	14058685	+	FBgn0038197
chr3R	14058938	14060951	+	FBgn0038197
chr3R	14088659	14090782	+	FBgn0038198
chr3R	14186533	14189298	-	FBgn0011582
chr3R	14294412	14296728	+	FBgn0038220
chr3R	14296807	14298850	+	FBgn0038220
chr3R	14435396	14436652	-	FBgn0086901
chr3R	14438111	14440133	-	FBgn0086901
chr3R	14452302	14454148	-	FBgn0086901
chr3R	14470515	14472087	-	FBgn0086901
chr3R	14568757	14570772	-	FBgn0038244
chr3R	14568757	14570772	-	FBgn0004629
chr3R	14568757	14570772	-	FBgn0038243
chr3R	14568757	14570772	+	FBgn0264904
chr3R	14576921	14581230	+	FBgn0020299
chr3R	14592803	14594448	+	FBgn0020299
chr3R	14596021	14596916	+	FBgn0020299
chr3R	14623231	14623731	-	FBgn0003169
chr3R	14677286	14678299	-	FBgn0265140
chr3R	14691302	14693759	-	FBgn0265140
chr3R	14709826	14711851	-	FBgn0262127
chr3R	14721754	14723352	-	FBgn0262127
chr3R	14736868	14739769	-	FBgn0011217
chr3R	14861637	14863147	-	FBgn0266756
chr3R	15085322	15086140	-	FBgn0038286
chr3R	15114238	15116149	-	FBgn0261859
chr3R	15242721	15244510	+	FBgn0266599
chr3R	15374809	15377948	+	FBgn0262483
chr3R	15405143	15406366	-	FBgn0038337
chr3R	15417524	15420924	-	FBgn0262397
chr3R	15417524	15420924	-	FBgn0267571
chr3R	15417524	15420924	-	FBgn0262429
chr3R	15455148	15458657	-	FBgn0038341
chr3R	15470496	15471976	-	FBgn0038341
chr3R	15472207	15474807	-	FBgn0038341
chr3R	15873341	15875470	-	FBgn0051183
chr3R	15920869	15921450	+	FBgn0038385
chr3R	16077627	16079106	-	FBgn0026059
chr3R	16077627	16079106	-	FBgn0052855
chr3R	16093474	16096351	-	FBgn0026059
chr3R	16230069	16231539	+	FBgn0040071
chr3R	16352240	16357054	-	FBgn0038420
chr3R	16448102	16449314	-	FBgn0044826
chr3R	16524187	16525465	+	FBgn0259244
chr3R	16593019	16594793	+	FBgn0038447
chr3R	16986377	16988768	-	FBgn0267152
chr3R	16986377	16988768	-	FBgn0038460
chr3R	17062822	17063469	+	FBgn0020493
chr3R	17077933	17079653	-	FBgn0038475
chr3R	17379874	17381165	+	FBgn0262871
chr3R	17379874	17381165	-	FBgn0038499
chr3R	17384775	17386606	+	FBgn0262871
chr3R	17384775	17386606	-	FBgn0038499
chr3R	17491402	17494493	-	FBgn0261046
chr3R	17499698	17502787	-	FBgn0261046
chr3R	17545662	17546650	-	FBgn0038519
chr3R	17611791	17614100	+	FBgn0038526
chr3R	17611791	17614100	+	FBgn0085310
chr3R	17653220	17654820	+	FBgn0038532
chr3R	17653220	17654820	-	FBgn0266750
chr3R	17745958	17748606	+	FBgn0038541
chr3R	17761838	17762596	-	FBgn0038542
chr3R	17963762	17965405	+	FBgn0263995
chr3R	18165743	18166134	-	FBgn0038570
chr3R	18165743	18166134	-	FBgn0038571
chr3R	18243056	18247564	+	FBgn0020238
chr3R	18315467	18319348	-	FBgn0051235
chr3R	18393992	18394800	-	FBgn0028670
chr3R	18444663	18446339	-	FBgn0004652
chr3R	18739288	18740505	-	FBgn0024329
chr3R	18914171	18917466	+	FBgn0261113
chr3R	18922884	18924792	+	FBgn0261113
chr3R	19067707	19069726	-	FBgn0004876
chr3R	19107478	19108897	+	FBgn0038679
chr3R	19254092	19257812	+	FBgn0038695
chr3R	19423934	19424867	-	FBgn0038706
chr3R	19423934	19424867	+	FBgn0051221
chr3R	19821490	19822174	-	FBgn0014135
chr3R	19905713	19907161	+	FBgn0038747
chr3R	20006238	20007722	-	FBgn0038755
chr3R	20260527	20264042	+	FBgn0262582
chr3R	20315460	20316239	+	FBgn0261550
chr3R	20316345	20317017	+	FBgn0261550
chr3R	20317512	20318850	+	FBgn0261550
chr3R	20324389	20324886	-	FBgn0038787
chr3R	20439168	20440774	-	FBgn0262869
chr3R	20485108	20489259	-	FBgn0265551
chr3R	20485108	20489259	+	FBgn0265550
chr3R	20569534	20569877	+	FBgn0038803
chr3R	20737091	20738073	-	FBgn0038821
chr3R	20737091	20738073	+	FBgn0004107
chr3R	20779727	20780167	+	FBgn0038826
chr3R	20822707	20823247	+	FBgn0019936
chr3R	20822707	20823247	+	FBgn0082986
chr3R	20822707	20823247	+	FBgn0083055
chr3R	20827934	20830498	-	FBgn0027493
chr3R	20827934	20830498	+	FBgn0264839
chr3R	20902463	20904436	+	FBgn0038840
chr3R	20914093	20915453	-	FBgn0051191
chr3R	20914093	20915453	+	FBgn0038842
chr3R	20983100	20986076	+	FBgn0013995
chr3R	21020652	21023167	+	FBgn0026056
chr3R	21020652	21023167	-	FBgn0046763
chr3R	21066884	21068103	+	FBgn0000083
chr3R	21089447	21089897	-	FBgn0038853
chr3R	21089447	21089897	+	FBgn0265067
chr3R	21169912	21172623	+	FBgn0264357
chr3R	21192243	21196304	+	FBgn0264357
chr3R	21291560	21294422	-	FBgn0038880
chr3R	21411987	21412981	-	FBgn0008651
chr3R	21698176	21698977	-	FBgn0051176
chr3R	21798202	21803262	-	FBgn0262331
chr3R	21798202	21803262	-	FBgn0013759
chr3R	21798202	21803262	-	FBgn0263521
chr3R	21874898	21875761	+	FBgn0038912
chr3R	21874898	21875761	+	FBgn0064912
chr3R	21948056	21950487	+	FBgn0264490
chr3R	21985439	21986277	+	FBgn0264490
chr3R	22045883	22048570	+	FBgn0264491
chr3R	22060383	22063647	+	FBgn0264491
chr3R	22521794	22528552	-	FBgn0038981
chr3R	22536957	22537760	-	FBgn0038983
chr3R	22552043	22554513	-	FBgn0264871
chr3R	22552043	22554513	+	FBgn0260942
chr3R	22626277	22627682	-	FBgn0020278
chr3R	22630445	22633004	-	FBgn0020278
chr3R	22630445	22633004	+	FBgn0263451
chr3R	22648683	22650336	+	FBgn0266418
chr3R	22776452	22777570	+	FBgn0039026
chr3R	22776452	22777570	-	FBgn0263663
chr3R	22778502	22780922	+	FBgn0039026
chr3R	22778502	22780922	-	FBgn0263663
chr3R	22917236	22919620	+	FBgn0017590
chr3R	23022228	23024629	-	FBgn0039039
chr3R	23045883	23048499	-	FBgn0039043
chr3R	23066210	23068045	-	FBgn0039048
chr3R	23116880	23118011	-	FBgn0039055
chr3R	23171339	23172375	+	FBgn0265042
chr3R	23178122	23179118	+	FBgn0265042
chr3R	23215833	23217336	-	FBgn0262975
chr3R	23223288	23226996	-	FBgn0262975
chr3R	23244800	23249195	-	FBgn0039064
chr3R	23337357	23338806	-	FBgn0003118
chr3R	23339486	23341065	-	FBgn0003118
chr3R	23341152	23343003	-	FBgn0003118
chr3R	23345806	23346652	-	FBgn0003118
chr3R	23659529	23666311	-	FBgn0051145
chr3R	23729045	23730949	-	FBgn0065098
chr3R	23729045	23730949	+	FBgn0039109
chr3R	23745529	23747114	+	FBgn0263782
chr3R	23745529	23747114	-	FBgn0267760
chr3R	23785954	23788724	+	FBgn0015513
chr3R	23795826	23796624	+	FBgn0015513
chr3R	23934807	23936411	+	FBgn0039130
chr3R	23934807	23936411	-	FBgn0001098
chr3R	23969260	23970175	+	FBgn0051140
chr3R	23998909	24000779	-	FBgn0020647
chr3R	24013856	24018541	-	FBgn0020647
chr3R	24178453	24179177	+	FBgn0039161
chr3R	24183056	24184486	+	FBgn0039161
chr3R	24263524	24266215	+	FBgn0051130
chr3R	24263524	24266215	-	FBgn0011225
chr3R	24318079	24320738	-	FBgn0267762
chr3R	24318079	24320738	-	FBgn0028471
chr3R	24318079	24320738	+	FBgn0011785
chr3R	24564350	24567917	-	FBgn0039209
chr3R	24629714	24631542	+	FBgn0039213
chr3R	24629714	24631542	-	FBgn0046685
chr3R	24767848	24768877	-	FBgn0267210
chr3R	24790344	24791366	+	FBgn0039225
chr3R	24798667	24800137	-	FBgn0039226
chr3R	24798667	24800137	-	FBgn0039227
chr3R	24810883	24812402	-	FBgn0027539
chr3R	24837657	24839710	+	FBgn0039232
chr3R	24861310	24862382	-	FBgn0039237
chr3R	25049616	25052022	+	FBgn0039266
chr3R	25218294	25219691	+	FBgn0051103
chr3R	25218294	25219691	+	FBgn0051106
chr3R	25236616	25237965	+	FBgn0039297
chr3R	25271111	25272263	+	FBgn0039308
chr3R	25271111	25272263	+	FBgn0039309
chr3R	25283293	25284659	+	FBgn0051300
chr3R	25329124	25329787	-	FBgn0045761
chr3R	25329124	25329787	-	FBgn0039328
chr3R	25586319	25589126	+	FBgn0011666
chr3R	25586319	25589126	-	FBgn0262319
chr3R	25586319	25589126	-	FBgn0267570
chr3R	25611309	25613231	-	FBgn0039348
chr3R	25658660	25660681	-	FBgn0027508
chr3R	25815094	25816439	+	FBgn0039376
chr3R	25878170	25879606	-	FBgn0027865
chr3R	25966784	25968673	+	FBgn0000206
chr3R	26005525	26006779	-	FBgn0002733
chr3R	26005525	26006779	-	FBgn0266399
chr3R	26006908	26009765	-	FBgn0266399
chr3R	26020720	26021734	-	FBgn0263653
chr3R	26084988	26087059	-	FBgn0039411
chr3R	26198849	26202408	+	FBgn0265379
chr3R	26440394	26441535	+	FBgn0263118
chr3R	26463322	26467041	+	FBgn0039430
chr3R	26757394	26762020	-	FBgn0267122
chr3R	26845170	26848923	-	FBgn0051072
chr3R	26845170	26848923	+	FBgn0267742
chr3R	26889903	26890574	+	FBgn0004359
chr3R	26896294	26896890	+	FBgn0004359
chr3R	26907085	26907700	+	FBgn0004359
chr3R	26953588	26955837	-	FBgn0039464
chr3R	27090515	27091301	-	FBgn0039481
chr3R	27103322	27104928	-	FBgn0039486
chr3R	27106893	27108957	-	FBgn0039487
chr3R	27128738	27129541	-	FBgn0039492
chr3R	27135437	27140697	-	FBgn0039492
chr3R	27147736	27149811	-	FBgn0039492
chr3R	27157652	27158875	+	FBgn0039494
chr3R	27159416	27161000	+	FBgn0039494
chr3R	27270562	27271233	-	FBgn0002441
chr3R	27336470	27341572	+	FBgn0260487
chr3R	27367346	27369999	+	FBgn0260487
chr3R	27367346	27369999	-	FBgn0263453
chr3R	27396122	27398208	-	FBgn0016061
chr3R	27612531	27615360	+	FBgn0039530
chr3R	27637201	27638985	+	FBgn0039532
chr3R	27654064	27656526	-	FBgn0266579
chr3R	27924968	27925531	+	FBgn0027579
chr3R	27924968	27925531	-	FBgn0267126
chr3R	27928815	27930213	+	FBgn0027579
chr3R	27945273	27947505	-	FBgn0039561
chr3R	27967955	27968669	-	FBgn0003890
chr3R	27987615	27988611	-	FBgn0003890
chr3R	28136100	28139590	-	FBgn0267746
chr3R	28326701	28329184	-	FBgn0261618
chr3R	28601175	28603442	+	FBgn0082958
chr3R	28601175	28603442	+	FBgn0082960
chr3R	28601175	28603442	+	FBgn0001215
chr3R	28601175	28603442	+	FBgn0082976
chr3R	28601175	28603442	+	FBgn0082959
chr3R	28601175	28603442	+	FBgn0082957
chr3R	28601175	28603442	+	FBgn0082975
chr3R	28601175	28603442	+	FBgn0082974
chr3R	28627938	28630285	-	FBgn0039590
chr3R	28682441	28683370	+	FBgn0039594
chr3R	28685960	28687518	+	FBgn0039594
chr3R	28690607	28691867	+	FBgn0039594
chr3R	28708117	28708940	+	FBgn0027655
chr3R	28892517	28893674	+	FBgn0265998
chr3R	28921504	28922573	+	FBgn0265998
chr3R	29020115	29022747	+	FBgn0267127
chr3R	29020115	29022747	-	FBgn0039620
chr3R	29020115	29022747	-	FBgn0265204
chr3R	29062895	29066605	-	FBgn0039632
chr3R	29062895	29066605	+	FBgn0039633
chr3R	29069188	29071704	+	FBgn0039633
chr3R	29083317	29083810	+	FBgn0039633
chr3R	29090777	29094433	+	FBgn0039633
chr3R	29158573	29159411	+	FBgn0039644
chr3R	29293211	29293882	-	FBgn0039659
chr3R	29495261	29496803	+	FBgn0039667
chr3R	29605568	29606702	+	FBgn0086361
chr3R	29686118	29686707	-	FBgn0039682
chr3R	29763840	29766351	+	FBgn0001297
chr3R	29787777	29789216	+	FBgn0001297
chr3R	29842577	29843677	+	FBgn0039709
chr3R	30019505	30021587	-	FBgn0039738
chr3R	30035055	30035720	+	FBgn0026597
chr3R	30035055	30035720	-	FBgn0039740
chr3R	30102452	30103588	+	FBgn0266411
chr3R	30105705	30106481	+	FBgn0266411
chr3R	30107092	30108782	+	FBgn0266411
chr3R	30107092	30108782	+	FBgn0267781
chr3R	30140705	30143084	-	FBgn0039747
chr3R	30145194	30146136	-	FBgn0039747
chr3R	30213746	30215577	-	FBgn0000278
chr3R	30295273	30297677	+	FBgn0010113
chr3R	30460375	30462961	+	FBgn0039774
chr3R	30466343	30468806	+	FBgn0039776
chr3R	30500297	30501922	-	FBgn0051371
chr3R	30500297	30501922	-	FBgn0039780
chr3R	30522514	30523981	-	FBgn0027654
chr3R	30799582	30801360	-	FBgn0011739
chr3R	30801498	30805208	-	FBgn0011739
chr3R	30886710	30888123	-	FBgn0000416
chr3R	30958877	30959823	+	FBgn0039812
chr3R	30978648	30981432	-	FBgn0004573
chr3R	30988213	30989757	-	FBgn0004573
chr3R	30988213	30989757	-	FBgn0051008
chr3R	31154988	31156887	+	FBgn0013973
chr3R	31237001	31240064	-	FBgn0051005
chr3R	31266549	31267415	+	FBgn0039839
chr3R	31346267	31351395	+	FBgn0085376
chr3R	31384905	31386916	+	FBgn0039844
chr3R	31439099	31444237	+	FBgn0261988
chr3R	31660719	31661536	+	FBgn0039862
chr3R	31713017	31715741	+	FBgn0003870
chr3R	31723435	31724254	+	FBgn0003870
chr3R	31809560	31811900	-	FBgn0266268
chr3R	31809560	31811900	-	FBgn0039882
chr3R	31822253	31823897	+	FBgn0039883
chr3R	31856460	31857315	-	FBgn0011224
chr3R	31900184	31902038	-	FBgn0011224
chr3R	31906189	31908011	-	FBgn0011224
chr3R	31962601	31963026	-	FBgn0011224
chr3R	32012197	32013319	-	FBgn0011224
chr3R	32012197	32013319	+	FBgn0267116
chr4	69380	71454	+	FBgn0085432
chr4	113975	116003	-	FBgn0011747
chr4	113975	116003	+	FBgn0085432
chr4	134840	137862	+	FBgn0052000
chr4	155061	159037	-	FBgn0051997
chr4	155061	159037	-	FBgn0053978
chr4	204948	205960	-	FBgn0051998
chr4	210070	211240	+	FBgn0024811
chr4	227413	228445	-	FBgn0051999
chr4	227413	228445	+	FBgn0039896
chr4	252314	254873	-	FBgn0053481
chr4	304931	306124	-	FBgn0039900
chr4	467804	469516	+	FBgn0262731
chr4	467804	469516	-	FBgn0039908
chr4	501373	502661	+	FBgn0004607
chr4	517130	518504	+	FBgn0004607
chr4	541105	541839	-	FBgn0026869
chr4	558007	559955	+	FBgn0022361
chr4	582090	584808	+	FBgn0039911
chr4	611207	611650	+	FBgn0025936
chr4	624233	626576	-	FBgn0039914
chr4	624233	626576	+	FBgn0262302
chr4	658407	660596	-	FBgn0051992
chr4	661902	662756	-	FBgn0051992
chr4	865465	867725	-	FBgn0039936
chr4	878664	880949	-	FBgn0025726
chr4	878664	880949	+	FBgn0264821
chr4	892173	894997	-	FBgn0025726
chr4	902959	906382	+	FBgn0263093
chr4	902959	906382	-	FBgn0025726
chr4	1051877	1054246	-	FBgn0264607
chrX	261827	263609	-	FBgn0261446
chrX	261827	263609	+	FBgn0264507
chrX	337391	342438	-	FBgn0052816
chrX	337391	342438	+	FBgn0024989
chrX	520252	524900	+	FBgn0023535
chrX	520252	524900	-	FBgn0260400
chrX	539474	541208	+	FBgn0000108
chrX	569674	570916	+	FBgn0000108
chrX	569674	570916	+	FBgn0263534
chrX	635623	637563	+	FBgn0003575
chrX	788442	789349	-	FBgn0025620
chrX	789893	792516	-	FBgn0265662
chrX	789893	792516	-	FBgn0025620
chrX	908099	910270	-	FBgn0264449
chrX	1024897	1026060	-	FBgn0052814
chrX	1024897	1026060	+	FBgn0003638
chrX	1024897	1026060	-	FBgn0040351
chrX	1079351	1079863	+	FBgn0266005
chrX	1079351	1079863	-	FBgn0040397
chrX	1079975	1082054	+	FBgn0266005
chrX	1079975	1082054	-	FBgn0040397
chrX	1083278	1084365	+	FBgn0266005
chrX	1083278	1084365	-	FBgn0040397
chrX	1228872	1230455	-	FBgn0261444
chrX	1241735	1243103	-	FBgn0028550
chrX	1251972	1252521	-	FBgn0028550
chrX	1261258	1261576	-	FBgn0028550
chrX	1410201	1410844	+	FBgn0259108
chrX	1412279	1413418	+	FBgn0259108
chrX	1416818	1418298	+	FBgn0259108
chrX	1424674	1429166	+	FBgn0259108
chrX	1496108	1498963	-	FBgn0053513
chrX	1496108	1498963	+	FBgn0025394
chrX	1549616	1552464	-	FBgn0025390
chrX	1666636	1667585	-	FBgn0025390
chrX	1666636	1667585	+	FBgn0000482
chrX	1672981	1674007	+	FBgn0001189
chrX	1672981	1674007	-	FBgn0023531
chrX	1842877	1844457	+	FBgn0261548
chrX	1846701	1847741	+	FBgn0261548
chrX	1848726	1849619	+	FBgn0261548
chrX	1990077	1991140	+	FBgn0264562
chrX	2047411	2047971	-	FBgn0025631
chrX	2047411	2047971	+	FBgn0025632
chrX	2049502	2050539	-	FBgn0025631
chrX	2049502	2050539	+	FBgn0025632
chrX	2097337	2097824	+	FBgn0000382
chrX	2097995	2098724	+	FBgn0000382
chrX	2099016	2102212	+	FBgn0000382
chrX	2099016	2102212	+	FBgn0086043
chrX	2121350	2125106	-	FBgn0004860
chrX	2134473	2142496	+	FBgn0023507
chrX	2134473	2142496	-	FBgn0004861
chrX	2184664	2186047	+	FBgn0040899
chrX	2184664	2186047	-	FBgn0023542
chrX	2188118	2190522	+	FBgn0023549
chrX	2188118	2190522	+	FBgn0024984
chrX	2352588	2353832	-	FBgn0003159
chrX	2360090	2362016	-	FBgn0003159
chrX	2366531	2367471	-	FBgn0264598
chrX	2508264	2511635	-	FBgn0261451
chrX	2539259	2540171	-	FBgn0261451
chrX	2540396	2542201	-	FBgn0261451
chrX	2647957	2649621	+	FBgn0003371
chrX	2760459	2761857	+	FBgn0028369
chrX	2796198	2797625	+	FBgn0028369
chrX	2796198	2797625	-	FBgn0003996
chrX	2987471	2988304	+	FBgn0028369
chrX	3018433	3019314	+	FBgn0028369
chrX	3145473	3146637	+	FBgn0004647
chrX	3296879	3300163	+	FBgn0000479
chrX	3432182	3434335	+	FBgn0266350
chrX	3432182	3434335	-	FBgn0029657
chrX	3645091	3646451	+	FBgn0266429
chrX	4576903	4578479	-	FBgn0052773
chrX	4580029	4580985	-	FBgn0052773
chrX	4596027	4597229	-	FBgn0052773
chrX	4890808	4892212	+	FBgn0260971
chrX	4946049	4946787	+	FBgn0004368
chrX	5028424	5030546	-	FBgn0266096
chrX	5046765	5049149	+	FBgn0003028
chrX	5046765	5049149	-	FBgn0266096
chrX	5060658	5063625	+	FBgn0003028
chrX	5060658	5063625	-	FBgn0266096
chrX	5296970	5298400	+	FBgn0261803
chrX	5621821	5622373	-	FBgn0004687
chrX	5621821	5622373	-	FBgn0263631
chrX	5689968	5690505	-	FBgn0267081
chrX	5689968	5690505	+	FBgn0000394
chrX	5704482	5706537	+	FBgn0029791
chrX	5763230	5764083	-	FBgn0013987
chrX	5835310	5836691	+	FBgn0029814
chrX	5892226	5893813	-	FBgn0267228
chrX	5901155	5902415	+	FBgn0000042
chrX	6003701	6004633	+	FBgn0265691
chrX	6143056	6145331	-	FBgn0264386
chrX	6152317	6154152	-	FBgn0264386
chrX	6155913	6159849	-	FBgn0264386
chrX	6162755	6164867	-	FBgn0264386
chrX	6259376	6260640	-	FBgn0040918
chrX	6280667	6281486	-	FBgn0052745
chrX	6631731	6632571	+	FBgn0029881
chrX	6800078	6800970	-	FBgn0259228
chrX	7291164	7292487	-	FBgn0265457
chrX	7291164	7292487	-	FBgn0025549
chrX	7291164	7292487	-	FBgn0029941
chrX	7295706	7296837	-	FBgn0265457
chrX	7295706	7296837	-	FBgn0029941
chrX	7298316	7299569	-	FBgn0265457
chrX	7298316	7299569	-	FBgn0029941
chrX	7299640	7300399	-	FBgn0265457
chrX	7299640	7300399	-	FBgn0029941
chrX	7317486	7318799	-	FBgn0265457
chrX	7317486	7318799	-	FBgn0029941
chrX	7317486	7318799	-	FBgn0029943
chrX	7444900	7445615	+	FBgn0267089
chrX	7527336	7528752	-	FBgn0052719
chrX	7527336	7528752	+	FBgn0262612
chrX	7530163	7530548	-	FBgn0052719
chrX	7555685	7556265	+	FBgn0265694
chrX	7707103	7708906	-	FBgn0029504
chrX	7707103	7708906	+	FBgn0262979
chrX	8090506	8093406	-	FBgn0029996
chrX	8112434	8115829	-	FBgn0040319
chrX	8187341	8191751	+	FBgn0261873
chrX	8203216	8204361	+	FBgn0261873
chrX	8214634	8217586	+	FBgn0261873
chrX	8232771	8234648	+	FBgn0261873
chrX	8259455	8261300	+	FBgn0030027
chrX	8496552	8497606	+	FBgn0053181
chrX	8568790	8570579	+	FBgn0030049
chrX	8568790	8570579	-	FBgn0030050
chrX	8714106	8714580	-	FBgn0030060
chrX	8857579	8859647	+	FBgn0030065
chrX	8895207	8896557	-	FBgn0011661
chrX	8944797	8948053	+	FBgn0261549
chrX	9041710	9042808	+	FBgn0259734
chrX	9041710	9042808	-	FBgn0264384
chrX	9075279	9076430	-	FBgn0265413
chrX	9076559	9078268	-	FBgn0265413
chrX	9466642	9468690	-	FBgn0261260
chrX	9583241	9586688	+	FBgn0001186
chrX	9583241	9586688	+	FBgn0267101
chrX	9593604	9596405	+	FBgn0267103
chrX	9613800	9614979	+	FBgn0261931
chrX	9644920	9646903	-	FBgn0028341
chrX	9929707	9931272	-	FBgn0026415
chrX	9929707	9931272	-	FBgn0086044
chrX	10208203	10209875	-	FBgn0266199
chrX	10208203	10209875	-	FBgn0030183
chrX	10223780	10224420	+	FBgn0085437
chrX	10537066	10537616	-	FBgn0085443
chrX	10738590	10739352	-	FBgn0052676
chrX	10838075	10841634	-	FBgn0003321
chrX	10838075	10841634	+	FBgn0040850
chrX	11143746	11144266	+	FBgn0030271
chrX	11143746	11144266	+	FBgn0030272
chrX	11325741	11328079	+	FBgn0030286
chrX	11392016	11392425	+	FBgn0001624
chrX	11393896	11394900	+	FBgn0001624
chrX	11476048	11476753	+	FBgn0262685
chrX	11527846	11529655	+	FBgn0052666
chrX	11542084	11544793	+	FBgn0052666
chrX	11549800	11550583	+	FBgn0052666
chrX	11684119	11685066	+	FBgn0014133
chrX	11687591	11689167	+	FBgn0014133
chrX	11717810	11718628	+	FBgn0030329
chrX	11759836	11761341	+	FBgn0002577
chrX	11764645	11765751	+	FBgn0002577
chrX	11788871	11789445	+	FBgn0030334
chrX	11916024	11917283	-	FBgn0250871
chrX	12067750	12069755	+	FBgn0264675
chrX	12067750	12069755	+	FBgn0267001
chrX	12067750	12069755	-	FBgn0264676
chrX	12184107	12186680	+	FBgn0267001
chrX	12468045	12469617	+	FBgn0259143
chrX	12663901	12666519	+	FBgn0011837
chrX	12671736	12674004	+	FBgn0011837
chrX	12753825	12755576	+	FBgn0265830
chrX	13120728	13122540	+	FBgn0250862
chrX	13320001	13321325	+	FBgn0266375
chrX	13634498	13635815	+	FBgn0030505
chrX	13640196	13642513	+	FBgn0030505
chrX	13747712	13749056	-	FBgn0030520
chrX	13749672	13751129	-	FBgn0030520
chrX	13935362	13935829	-	FBgn0267033
chrX	14342330	14343561	+	FBgn0052600
chrX	14645377	14646488	-	FBgn0015773
chrX	14746619	14747219	-	FBgn0015774
chrX	14950043	14950685	-	FBgn0027601
chrX	15068899	15071932	+	FBgn0030607
chrX	15068899	15071932	-	FBgn0030608
chrX	15078298	15079363	-	FBgn0265873
chrX	15128821	15130076	+	FBgn0260006
chrX	15130379	15130895	+	FBgn0260006
chrX	15131699	15133001	+	FBgn0260006
chrX	15133604	15134726	+	FBgn0260006
chrX	15158391	15160461	-	FBgn0030617
chrX	15160679	15162994	-	FBgn0030617
chrX	15313461	15315141	-	FBgn0266276
chrX	15313461	15315141	+	FBgn0261703
chrX	15354488	15355488	-	FBgn0000028
chrX	15357448	15359416	-	FBgn0000028
chrX	15357448	15359416	-	FBgn0003132
chrX	15614513	15617602	-	FBgn0003463
chrX	15632617	15634344	-	FBgn0003463
chrX	15697462	15698467	+	FBgn0030668
chrX	15739946	15740750	+	FBgn0030679
chrX	15884970	15885783	-	FBgn0260938
chrX	16102443	16104986	-	FBgn0259699
chrX	16102443	16104986	-	FBgn0259700
chrX	16623327	16624422	-	FBgn0026181
chrX	16648475	16649470	+	FBgn0030766
chrX	16760143	16760955	-	FBgn0001250
chrX	16761329	16761945	-	FBgn0001250
chrX	16780452	16782632	-	FBgn0001250
chrX	17171734	17174512	+	FBgn0000163
chrX	17183942	17185260	+	FBgn0000163
chrX	17213893	17215169	+	FBgn0265267
chrX	17296596	17298924	+	FBgn0030838
chrX	17296596	17298924	-	FBgn0024238
chrX	17477447	17478678	-	FBgn0263706
chrX	17581214	17582007	+	FBgn0030847
chrX	17624134	17625589	-	FBgn0030850
chrX	17687137	17688629	-	FBgn0263258
chrX	17692228	17693903	-	FBgn0263258
chrX	17697173	17698528	-	FBgn0263258
chrX	17699242	17699615	-	FBgn0030863
chrX	17742288	17742700	+	FBgn0261570
chrX	17839330	17840253	+	FBgn0030870
chrX	17879891	17881574	-	FBgn0259168
chrX	17957210	17958050	-	FBgn0003380
chrX	17989394	17992939	-	FBgn0003380
chrX	18121913	18123052	+	FBgn0267166
chrX	18275597	18277256	+	FBgn0053542
chrX	18291836	18292967	+	FBgn0030911
chrX	18385988	18387488	+	FBgn0022355
chrX	18545857	18548474	+	FBgn0265598
chrX	18630484	18630997	-	FBgn0030941
chrX	18685807	18687523	+	FBgn0004959
chrX	18802436	18804152	+	FBgn0004462
chrX	18832758	18835570	+	FBgn0030964
chrX	19083184	19087420	+	FBgn0267059
chrX	19083184	19087420	-	FBgn0030982
chrX	19144740	19145243	-	FBgn0261461
chrX	19155687	19156652	-	FBgn0261461
chrX	19159271	19161777	-	FBgn0261461
chrX	19224530	19226001	+	FBgn0031001
chrX	19240397	19241931	-	FBgn0031002
chrX	19259636	19262394	-	FBgn0031006
chrX	19259636	19262394	+	FBgn0040068
chrX	19303813	19305006	-	FBgn0031012
chrX	19313886	19316331	-	FBgn0259834
chrX	19498203	19498857	+	FBgn0027621
chrX	19498203	19498857	+	FBgn0031023
chrX	19735226	19737433	+	FBgn0031065
chrX	19754545	19755212	+	FBgn0031069
chrX	19868633	19869115	+	FBgn0052529
chrX	20517746	20519712	-	FBgn0026323
chrX	20548844	20550978	+	FBgn0259162
chrX	21064506	21066006	-	FBgn0052512
chrX	21064506	21066006	+	FBgn0031150
chrX	21068343	21068740	+	FBgn0031150
chrX	21069159	21069561	+	FBgn0031150
chrX	21069974	21071466	+	FBgn0031150
chrX	21279687	21282061	-	FBgn0052521
chrX	21367096	21369708	+	FBgn0024182
chrX	21367096	21369708	+	FBgn0024251
chrX	22592442	22594373	-	FBgn0052499
chr2L	39326	42004	-	FBgn0051973
chr2L	128081	129499	+	FBgn0031228
chr2L	128081	129499	-	FBgn0025683
chr2L	178348	180711	+	FBgn0016977
chr2L	336050	337063	+	FBgn0004611
chr2L	433089	437142	+	FBgn0004583
chr2L	481711	486214	+	FBgn0003963
chr2L	494019	495678	+	FBgn0003963
chr2L	552449	553956	-	FBgn0005660
chr2L	552449	553956	-	FBgn0260933
chr2L	559013	559873	+	FBgn0031263
chr2L	559013	559873	-	FBgn0260933
chr2L	755934	758982	+	FBgn0031275
chr2L	840669	841922	-	FBgn0020304
chr2L	842726	843376	-	FBgn0020304
chr2L	843528	846272	-	FBgn0020304
chr2L	864775	867939	-	FBgn0029095
chr2L	864775	867939	-	FBgn0086031
chr2L	1116654	1117492	-	FBgn0016926
chr2L	1117718	1119264	-	FBgn0016926
chr2L	1122424	1123261	-	FBgn0016926
chr2L	1124696	1126809	-	FBgn0016926
chr2L	1190517	1190867	+	FBgn0031322
chr2L	1190973	1191403	+	FBgn0031322
chr2L	1263273	1266337	+	FBgn0041097
chr2L	1384650	1389818	-	FBgn0002543
chr2L	1559484	1560482	+	FBgn0261509
chr2L	1722377	1723891	-	FBgn0031359
chr2L	1727557	1728544	-	FBgn0000579
chr2L	1733377	1734239	+	FBgn0264494
chr2L	1734784	1736754	+	FBgn0264494
chr2L	1737534	1740133	+	FBgn0264494
chr2L	1919689	1921943	+	FBgn0031374
chr2L	1967425	1973533	-	FBgn0031375
chr2L	2085549	2087438	-	FBgn0053516
chr2L	2161235	2163227	-	FBgn0000097
chr2L	2163643	2164142	-	FBgn0000097
chr2L	2174522	2177217	-	FBgn0000097
chr2L	2177279	2179301	-	FBgn0000097
chr2L	2197045	2200208	-	FBgn0085201
chr2L	2201687	2204591	-	FBgn0051668
chr2L	2362612	2364275	-	FBgn0014010
chr2L	2373576	2374268	-	FBgn0031418
chr2L	2422798	2424118	+	FBgn0031428
chr2L	2493024	2495386	+	FBgn0011818
chr2L	2748921	2751861	-	FBgn0250906
chr2L	2806134	2808160	+	FBgn0031461
chr2L	2826718	2827521	-	FBgn0031464
chr2L	2862781	2865126	+	FBgn0031474
chr2L	2867434	2869657	+	FBgn0031476
chr2L	2867434	2869657	+	FBgn0031474
chr2L	2867434	2869657	-	FBgn0051694
chr2L	2883598	2885123	-	FBgn0024947
chr2L	3011490	3012842	+	FBgn0031488
chr2L	3017557	3018374	-	FBgn0031489
chr2L	3363136	3363960	-	FBgn0085423
chr2L	3364570	3365647	-	FBgn0085423
chr2L	3369006	3370021	-	FBgn0085423
chr2L	3477114	3478697	+	FBgn0264549
chr2L	3477114	3478697	+	FBgn0261560
chr2L	3481787	3482474	-	FBgn0031542
chr2L	3619195	3619597	+	FBgn0015663
chr2L	3642189	3643034	-	FBgn0000721
chr2L	3776948	3778041	+	FBgn0004893
chr2L	3778368	3779207	+	FBgn0004893
chr2L	4036578	4037708	+	FBgn0000547
chr2L	4304681	4306814	+	FBgn0010473
chr2L	4413626	4418664	-	FBgn0031602
chr2L	4470202	4471435	-	FBgn0011603
chr2L	4812445	4815004	+	FBgn0031630
chr2L	4895428	4898774	+	FBgn0031645
chr2L	4999452	5000251	-	FBgn0053113
chr2L	5224093	5227478	-	FBgn0003716
chr2L	5229933	5231707	-	FBgn0003716
chr2L	5292103	5293648	+	FBgn0016076
chr2L	5304000	5307057	+	FBgn0016076
chr2L	5437773	5438457	-	FBgn0051647
chr2L	5753269	5754383	+	FBgn0031736
chr2L	5944550	5947223	+	FBgn0001128
chr2L	5978191	5979584	-	FBgn0000308
chr2L	5997096	5999118	-	FBgn0031759
chr2L	6079807	6084300	+	FBgn0266450
chr2L	6079807	6084300	+	FBgn0265999
chr2L	6204424	6206486	+	FBgn0085409
chr2L	6339116	6342542	+	FBgn0015623
chr2L	6347391	6349725	-	FBgn0031800
chr2L	6347391	6349725	-	FBgn0031801
chr2L	6642722	6646194	-	FBgn0051635
chr2L	6940730	6943457	-	FBgn0031871
chr2L	6940730	6943457	-	FBgn0031869
chr2L	7044671	7045624	+	FBgn0262872
chr2L	7131788	7132928	-	FBgn0085407
chr2L	7148400	7149051	-	FBgn0085407
chr2L	7373082	7373646	+	FBgn0031903
chr2L	7415458	7417117	+	FBgn0028387
chr2L	7439761	7441049	+	FBgn0031914
chr2L	7519460	7521107	+	FBgn0264891
chr2L	7519460	7521107	-	FBgn0264895
chr2L	7528464	7529363	-	FBgn0264895
chr2L	7701574	7702247	-	FBgn0041182
chr2L	7809046	7810605	-	FBgn0031952
chr2L	7876048	7876770	-	FBgn0031959
chr2L	7928269	7931865	-	FBgn0085450
chr2L	7972244	7973485	-	FBgn0085450
chr2L	7992920	7995134	-	FBgn0031969
chr2L	7992920	7995134	-	FBgn0031970
chr2L	7992920	7995134	+	FBgn0266331
chr2L	8005111	8006228	-	FBgn0031973
chr2L	8103688	8105750	+	FBgn0261822
chr2L	8148974	8150371	-	FBgn0031990
chr2L	8148974	8150371	+	FBgn0263256
chr2L	8237960	8239085	-	FBgn0032006
chr2L	8270706	8271331	-	FBgn0003502
chr2L	8466868	8469948	+	FBgn0262029
chr2L	8471598	8472185	+	FBgn0262029
chr2L	8530879	8531768	+	FBgn0028394
chr2L	8531972	8533967	+	FBgn0028394
chr2L	8535179	8536950	+	FBgn0028394
chr2L	8623413	8625333	+	FBgn0011259
chr2L	8627297	8630232	+	FBgn0011259
chr2L	8689909	8691153	-	FBgn0004914
chr2L	8700087	8702315	-	FBgn0004914
chr2L	8732050	8733781	-	FBgn0003209
chr2L	8753033	8753425	+	FBgn0032065
chr2L	8922114	8923043	+	FBgn0085427
chr2L	8937643	8938191	+	FBgn0032075
chr2L	9271292	9273128	+	FBgn0267252
chr2L	9334276	9337369	+	FBgn0026439
chr2L	9449653	9451041	+	FBgn0002973
chr2L	9530562	9531781	+	FBgn0032123
chr2L	9612391	9615306	+	FBgn0019809
chr2L	9612391	9615306	+	FBgn0040070
chr2L	9692418	9694484	-	FBgn0000273
chr2L	9703324	9704417	+	FBgn0011207
chr2L	9703324	9704417	-	FBgn0051710
chr2L	9706031	9707608	+	FBgn0011207
chr2L	9728076	9729869	-	FBgn0028704
chr2L	9782441	9783692	+	FBgn0032147
chr2L	9906568	9908454	-	FBgn0032156
chr2L	9948398	9949482	+	FBgn0267611
chr2L	10009562	10011025	+	FBgn0011584
chr2L	10320230	10322008	-	FBgn0032218
chr2L	10494790	10497506	-	FBgn0086347
chr2L	10510352	10511764	-	FBgn0021953
chr2L	10510352	10511764	-	FBgn0032262
chr2L	10510352	10511764	-	FBgn0266458
chr2L	10514709	10516011	-	FBgn0021953
chr2L	10514709	10516011	-	FBgn0266458
chr2L	10771443	10772187	-	FBgn0051869
chr2L	10922891	10925898	-	FBgn0261871
chr2L	11045001	11046387	-	FBgn0032330
chr2L	11331410	11332983	-	FBgn0265795
chr2L	11842622	11843478	-	FBgn0264815
chr2L	11842622	11843478	+	FBgn0040968
chr2L	11842622	11843478	+	FBgn0259989
chr2L	11850758	11851935	-	FBgn0264815
chr2L	11850758	11851935	+	FBgn0032382
chr2L	12044710	12047034	-	FBgn0032399
chr2L	12044710	12047034	-	FBgn0032400
chr2L	12044710	12047034	-	FBgn0032401
chr2L	12044710	12047034	+	FBgn0265800
chr2L	12097324	12098469	+	FBgn0028707
chr2L	12097324	12098469	+	FBgn0032409
chr2L	12153395	12154169	+	FBgn0051760
chr2L	12176573	12177885	+	FBgn0000114
chr2L	12176573	12177885	-	FBgn0032422
chr2L	12365508	12366378	+	FBgn0262475
chr2L	12369177	12370564	+	FBgn0262475
chr2L	12462604	12464421	-	FBgn0259176
chr2L	12469219	12469892	-	FBgn0259176
chr2L	12472706	12473517	-	FBgn0259176
chr2L	13088498	13089998	+	FBgn0265086
chr2L	13204669	13207893	+	FBgn0032482
chr2L	13252249	13253181	+	FBgn0051728
chr2L	13311976	13312784	-	FBgn0264308
chr2L	13424994	13427045	+	FBgn0263354
chr2L	13463977	13467688	+	FBgn0263354
chr2L	13865758	13866416	+	FBgn0028509
chr2L	13865758	13866416	-	FBgn0266142
chr2L	13912496	13914122	+	FBgn0025115
chr2L	13914991	13915429	+	FBgn0032536
chr2L	13977756	13979284	+	FBgn0028940
chr2L	14139435	14141643	+	FBgn0028906
chr2L	14298988	14300218	+	FBgn0261563
chr2L	14301054	14301680	+	FBgn0261563
chr2L	14399975	14400997	-	FBgn0004858
chr2L	14405221	14406521	-	FBgn0004858
chr2L	14621956	14622988	-	FBgn0003016
chr2L	14950897	14954052	-	FBgn0259213
chr2L	15242175	15245796	-	FBgn0028516
chr2L	15580420	15581965	+	FBgn0028370
chr2L	15764337	15764994	+	FBgn0028507
chr2L	15851594	15852825	+	FBgn0028903
chr2L	15911100	15915091	-	FBgn0028645
chr2L	15911100	15915091	+	FBgn0266161
chr2L	15911100	15915091	+	FBgn0266162
chr2L	16003300	16004362	+	FBgn0264364
chr2L	16003300	16004362	+	FBgn0028644
chr2L	16003300	16004362	-	FBgn0085196
chr2L	16003300	16004362	-	FBgn0264374
chr2L	16003300	16004362	+	FBgn0045827
chr2L	16257058	16258274	+	FBgn0028515
chr2L	16257058	16258274	-	FBgn0024734
chr2L	16266744	16274654	-	FBgn0001994
chr2L	16281437	16286393	-	FBgn0001994
chr2L	16315235	16316825	-	FBgn0000250
chr2L	16318502	16319527	-	FBgn0000250
chr2L	16447590	16449218	-	FBgn0028523
chr2L	16447590	16449218	+	FBgn0020415
chr2L	16450310	16451525	+	FBgn0020415
chr2L	16450310	16451525	+	FBgn0020414
chr2L	16671440	16673125	-	FBgn0032593
chr2L	16833719	16835288	-	FBgn0032612
chr2L	16833719	16835288	-	FBgn0032613
chr2L	16857261	16857840	-	FBgn0051809
chr2L	17254780	17256689	-	FBgn0032629
chr2L	17394474	17396550	+	FBgn0020503
chr2L	17447977	17450555	-	FBgn0260632
chr2L	17605746	17607374	-	FBgn0265585
chr2L	18144906	18145882	+	FBgn0265671
chr2L	18144906	18145882	-	FBgn0041184
chr2L	18169350	18171280	-	FBgn0261804
chr2L	18231840	18234123	-	FBgn0261804
chr2L	18496089	18497304	-	FBgn0032683
chr2L	18569904	18570700	-	FBgn0085370
chr2L	18654871	18659912	+	FBgn0032694
chr2L	18694210	18694652	-	FBgn0032699
chr2L	18984412	18986263	-	FBgn0032731
chr2L	19023513	19027228	-	FBgn0263838
chr2L	19023513	19027228	+	FBgn0032740
chr2L	19389199	19390030	-	FBgn0032774
chr2L	19535951	19538613	+	FBgn0053116
chr2L	19535951	19538613	+	FBgn0032803
chr2L	19535951	19538613	+	FBgn0051697
chr2L	19535951	19538613	+	FBgn0267011
chr2L	19547078	19549764	+	FBgn0041180
chr2L	19942081	19943489	+	FBgn0263873
chr2L	20078763	20082105	-	FBgn0263773
[truncated: 3,051 more rows]

## Sheet: Intersect_Pcl & OGT peaks
chr2L	434691	434862	+	FBgn0004583	ex
chr2L	435154	435468	+	FBgn0004583	ex
chr2L	494019	495767	+	FBgn0003963	ush
chr2L	502417	503243	+	FBgn0003963	ush
chr2L	552449	552772	-	FBgn0005660	Ets21C
chr2L	1967425	1973533	-	FBgn0031375	erm
chr2L	2197045	2199395	-	FBgn0085201	CG34172
chr2L	2201687	2204137	-	FBgn0051668	CG31668
chr2L	2806529	2806859	+	FBgn0031461	daw
chr2L	3678424	3679437	+	FBgn0085369	Drgx
chr2L	5437773	5438457	-	FBgn0051647	lncRNA:CR31647
chr2L	5978190	5979584	-	FBgn0000308	chic
chr2L	6204424	6205353	+	FBgn0085409	smal
chr2L	7375799	7376461	+	FBgn0031903	Wnt10
chr2L	9271292	9273128	+	FBgn0267252	Ggamma30A
chr2L	11331410	11332983	-	FBgn0265795	lncRNA:CR44584
chr2L	11842621	11843478	+	FBgn0040968	CG14933
chr2L	11842621	11843478	-	FBgn0264815	Pde1c
chr2L	11842621	11843478	+	FBgn0259989	CG42486
chr2L	13426194	13427045	+	FBgn0263354	CG42784
chr2L	14405220	14405611	-	FBgn0004858	elB
chr2L	16447235	16447409	-	FBgn0028523	CG5888
chr2L	16447235	16447409	+	FBgn0020415	Idgf2
chr2L	16448275	16449048	-	FBgn0028523	CG5888
chr2L	16448275	16449048	+	FBgn0020415	Idgf2
chr2L	16450310	16451525	+	FBgn0020415	Idgf2
chr2L	16450310	16451525	+	FBgn0020414	Idgf3
chr2L	18694210	18695102	-	FBgn0032699	CG10383
chr2L	19549763	19549764	+	FBgn0041180	Tep4
chr2R	5725702	5726589	-	FBgn0000099	nan
chr2R	8238966	8239509	+	FBgn0013726	pnut
chr2R	9677580	9678731	-	FBgn0033438	Mmp2
chr2R	9885712	9887771	-	FBgn0033463	CG1513
chr2R	9885712	9887771	+	FBgn0033461	CG12923
chr2R	10039970	10040172	-	FBgn0033476	oys
chr2R	10535687	10535688	-	FBgn0005630	nan
chr2R	11413405	11414125	-	FBgn0015872	Drip
chr2R	11494187	11496461	+	FBgn0001269	inv
chr2R	11501467	11502910	+	FBgn0001269	inv
chr2R	15768767	15770936	-	FBgn0265991	Zasp52
chr2R	18317582	18318451	-	FBgn0010575	nan
chr2R	21083771	21084191	+	FBgn0003748	Treh
chr2R	21361954	21362401	-	FBgn0000395	cv-2
chr2R	21496641	21497490	-	FBgn0010470	Fkbp14
chr2R	21528189	21530693	+	FBgn0003731	Egfr
chr2R	21530869	21530870	+	FBgn0003731	Egfr
chr2R	23568027	23569031	+	FBgn0015903	apt
chr2R	24146170	24146968	+	FBgn0019643	AANAT1
chr2R	24156447	24156834	+	FBgn0019643	AANAT1
chr2R	24366200	24366755	-	FBgn0266046	lncRNA:CR44811
chr2R	24366200	24366755	+	FBgn0004101	bs
chr2R	24369264	24369777	-	FBgn0266046	lncRNA:CR44811
chr2R	24369264	24369777	+	FBgn0004101	bs
chr2R	24687756	24688409	-	FBgn0035049	Mmp1
chr2R	24749514	24749829	+	FBgn0050421	Usp15-31
chr3L	370679	373758	-	FBgn0262139	trh
chr3L	379142	380818	-	FBgn0262139	trh
chr3L	383103	383858	-	FBgn0262139	trh
chr3L	746211	746824	-	FBgn0035160	hng3
chr3L	1098408	1099117	-	FBgn0004870	bab1
chr3L	1279222	1280573	+	FBgn0052333	CG32333
chr3L	1626861	1627807	-	FBgn0035245	GC
chr3L	1626861	1627807	-	FBgn0035246	CG13928
chr3L	3625955	3627212	+	FBgn0263239	dar1
chr3L	3646991	3648206	+	FBgn0263239	dar1
chr3L	3688950	3689971	+	FBgn0263495	lncRNA:CR43484
chr3L	4186998	4189057	+	FBgn0040696	CG18675
chr3L	4186998	4189057	-	FBgn0035505	Teh2
chr3L	4186998	4189057	+	FBgn0003710	tipE
chr3L	7432384	7433988	-	FBgn0014011	Rac2
chr3L	7432384	7433988	+	FBgn0259935	CG42458
chr3L	9828772	9829468	+	FBgn0264489	CG43897
chr3L	12705463	12706424	+	FBgn0014343	mirr
chr3L	15098459	15099660	-	FBgn0264704	lncRNA:CR43973
chr3L	15098459	15099660	+	FBgn0266452	CTPsyn
chr3L	17443808	17445180	+	FBgn0036725	CG18265
chr3L	19562754	19562760	+	FBgn0267576	lncRNA:CR45916
chr3L	20619758	20621811	-	FBgn0001323	knrl
chr3L	20695229	20695666	-	FBgn0001320	kni
chr3L	21611370	21612672	+	FBgn0261953	TfAP-2
chr3R	8112546	8113235	+	FBgn0243512	puc
chr3R	8112546	8113235	-	FBgn0265419	lncRNA:CR44331
chr3R	8150160	8151572	-	FBgn0001138	grn
chr3R	8169766	8171531	-	FBgn0001138	grn
chr3R	8177550	8178151	-	FBgn0001138	grn
chr3R	8197106	8198309	-	FBgn0262994	lncRNA:CR43302
chr3R	9948683	9950512	+	FBgn0267336	Glut4EF
chr3R	10562795	10564154	-	FBgn0001235	hth
chr3R	12369650	12370820	+	FBgn0267679	lncRNA:CR46015
chr3R	14057098	14058685	+	FBgn0038197	foxo
chr3R	14623231	14623731	-	FBgn0003169	put
chr3R	15419127	15420924	-	FBgn0267571	lncRNA:CR45911
chr3R	20779727	20780167	+	FBgn0038826	Syp
chr3R	23178122	23178784	+	FBgn0265042	Irk1
chr3R	23335977	23336978	-	FBgn0003118	pnt
chr3R	23999918	24000779	-	FBgn0020647	KrT95D
chr3R	24183274	24184486	+	FBgn0039161	CG13606
chr3R	24790344	24791366	+	FBgn0039225	Ets96B
chr3R	26085273	26087059	-	FBgn0039411	dysf
chr3R	27396122	27397853	-	FBgn0016061	side
chr3R	29605568	29606702	+	FBgn0086361	alph
chr3R	29765340	29766351	+	FBgn0001297	kay
chr4	69677	71454	+	FBgn0085432	pan
chr4	113455	114187	+	FBgn0085432	pan
chr4	155495	156921	-	FBgn0051997	CG31997
chr4	252398	253949	-	FBgn0053481	dpr7
chr4	517129	518504	+	FBgn0004607	zfh2
chrX	1410201	1410683	+	FBgn0259108	futsch
chrX	1412278	1413418	+	FBgn0259108	futsch
chrX	1417217	1418298	+	FBgn0259108	futsch
chrX	1549616	1552464	-	FBgn0025390	Mur2B
chrX	2050071	2050539	+	FBgn0025632	CG4313
chrX	2050071	2050539	-	FBgn0025631	moody
chrX	2121350	2123132	-	FBgn0004860	ph-d
chrX	2134473	2138853	-	FBgn0004861	ph-p
chrX	2141277	2142496	+	FBgn0023507	D2hgdh
chrX	4577180	4578026	-	FBgn0052773	lncRNA:CR32773
chrX	4580984	4581556	-	FBgn0052773	lncRNA:CR32773
chrX	4596380	4597229	-	FBgn0052773	lncRNA:CR32773
chrX	7444900	7445615	+	FBgn0267089	lncRNA:CR45533
chrX	7527336	7528430	+	FBgn0262612	CG43138
chrX	7527336	7528430	-	FBgn0052719	CG32719
chrX	7530163	7530548	-	FBgn0052719	CG32719
chrX	14645377	14646466	-	FBgn0015773	NetA
chrX	15354488	15355488	-	FBgn0000028	acj6
chrX	15357448	15359416	-	FBgn0000028	acj6
chrX	15357448	15359416	-	FBgn0003132	Pp1-13C
chrX	18275597	18277256	+	FBgn0053542	upd3
chrX	20548844	20550978	+	FBgn0259162	RunxB
chr2L	20766560	20774764	+	FBgn0000251	cad
chr2L	20776380	20778979	+	FBgn0000251	cad
chr2L	20779568	20783913	+	FBgn0000251	cad
chr3R	30904914	30913351	+	FBgn0020912	Ptx1
chr3R	30914010	30915929	+	FBgn0020912	Ptx1
chr3R	30916373	30923951	+	FBgn0020912	Ptx1

## Sheet: Deseq2 of diet+OSMI-1
ID	BaseMean	log2FoldChange	SE	Wald	pvalue	padj	Gene	pvals practical sig	qvals practical sig
FBgn0002565	2240.32	-6.1545	0.14497	-42.4535	0	0	Lsp2	1	1
FBgn0017424	90.2148	-3.29968	0.260675	-12.6582	1.01e-36	5.94e-33	asRNA:CR11538	1	1
FBgn0039685	1110.53	-1.1477	0.134531	-8.53118	1.45e-17	5.7e-14	Obp99b	0.999986	1
FBgn0024289	1530.64	-0.919863	0.11022	-8.34569	7.08e-17	2.09e-13	Sodh-1	0.998811	1
FBgn0031805	283.14	1.26635	0.157893	8.02036	1.05e-15	2.49e-12	Nepl4	0.999992	1
FBgn0010019	10222.4	1.13421	0.142765	7.94457	1.95e-15	3.83e-12	Cyp4g1	0.99994	1
FBgn0039872	250.836	1.25939	0.171825	7.32951	2.31e-13	3.89e-10	salt	0.999957	1
FBgn0004181	844.425	1.21463	0.16625	7.30607	2.75e-13	4.06e-10	Ebp	0.999924	1
FBgn0039094	356.208	-1.06492	0.146142	-7.28691	3.17e-13	4.16e-10	CG10184	0.999489	1
FBgn0032144	242.649	1.41675	0.196858	7.19684	6.16e-13	7.27e-10	CG17633	0.999988	1
FBgn0013307	291.993	1.12598	0.158854	7.08813	1.36e-12	1.46e-09	Odc1	0.99967	1
FBgn0085256	965.942	-0.894975	0.126686	-7.06452	1.61e-12	1.51e-09	CG34227	0.992799	0.995754
FBgn0030041	908.919	0.76313	0.108086	7.06042	1.66e-12	1.51e-09	CG12116	0.950364	0.959311
FBgn0050008	432.474	1.2151	0.172994	7.02396	2.16e-12	1.82e-09	CG30008	0.999865	1
FBgn0259975	142.009	1.56059	0.22882	6.82017	9.09e-12	7.15e-09	Sfp87B	0.99999	1
FBgn0000055	379.499	-1.05983	0.155792	-6.80283	1.03e-11	7.56e-09	Adh	0.998848	1
FBgn0043783	1984.56	-0.854939	0.126224	-6.77319	1.26e-11	8.74e-09	CG32444	0.983777	0.988555
FBgn0039114	1441.98	-0.705481	0.105687	-6.67522	2.47e-11	1.62e-08	Lsd-1	0.872927	0.89245
FBgn0039873	205.884	1.22349	0.185348	6.60107	4.08e-11	2.53e-08	Smvt	0.999715	1
FBgn0001234	21935.7	-0.823833	0.12517	-6.5817	4.65e-11	2.74e-08	lncRNA:Hsromega	0.971828	0.978214
FBgn0034816	633.107	0.978515	0.153432	6.3775	1.8e-10	1.01e-07	CG3085	0.994841	0.997632
FBgn0039521	77.8566	1.54683	0.245486	6.30109	2.96e-10	1.59e-07	CG5402	0.999955	1
FBgn0028519	45.8569	-1.62699	0.261909	-6.21202	5.23e-10	2.68e-07	hll	0.999965	1
FBgn0054034	149.353	1.36533	0.220178	6.20102	5.61e-10	2.76e-07	CG34034	0.999803	1
FBgn0035087	2624.93	0.745576	0.120838	6.17004	6.83e-10	3.22e-07	CG2765	0.908103	0.923131
FBgn0022355	14136.8	-0.650017	0.105484	-6.16226	7.17e-10	3.25e-07	Tsf1	0.731291	0.769801
FBgn0259739	502.167	1.11115	0.181905	6.10838	1.01e-09	4.25e-07	CG42393	0.99809	1
FBgn0037547	493.07	1.05986	0.173515	6.10819	1.01e-09	4.25e-07	CG7910	0.996899	0.999442
FBgn0052282	149.609	-1.16733	0.19256	-6.06216	1.34e-09	5.46e-07	Drsl4	0.998754	1
FBgn0039518	342.377	1.05241	0.177785	5.91959	3.23e-09	1.27e-06	CG13978	0.995722	0.998431
FBgn0035189	384.768	-0.831837	0.14126	-5.8887	3.89e-09	1.48e-06	CG9119	0.959739	0.968111
FBgn0035598	857.146	0.882258	0.150871	5.84778	4.98e-09	1.84e-06	CG4669	0.975611	0.98152
FBgn0265267	167.781	1.26216	0.216183	5.8384	5.27e-09	1.88e-06	CG18258	0.999133	1
FBgn0032464	382.097	0.995949	0.170999	5.82429	5.74e-09	1.99e-06	Vha68-3	0.991879	0.995085
FBgn0033782	1491.61	0.662286	0.113902	5.81454	6.08e-09	2.05e-06	sug	0.751387	0.787161
FBgn0035988	1918.76	0.870077	0.149902	5.80431	6.46e-09	2.05e-06	CG3982	0.971415	0.977966
FBgn0038147	720.431	-0.696524	0.11997	-5.8058	6.41e-09	2.05e-06	CCHa2	0.82379	0.850694
FBgn0046332	366.889	0.988596	0.170438	5.80034	6.62e-09	2.05e-06	gskt	0.991063	0.99452
FBgn0035042	47.7079	1.54606	0.266933	5.79193	6.96e-09	2.11e-06	CG3640	0.999841	1
FBgn0052081	392.971	1.01621	0.17688	5.74518	9.18e-09	2.64e-06	CG32081	0.992617	0.995656
FBgn0000094	61.1923	1.46879	0.255502	5.74864	9e-09	2.64e-06	Anp	0.999729	1
FBgn0040371	274.356	1.00199	0.175783	5.70017	1.2e-08	3.36e-06	CG12470	0.991164	0.994537
FBgn0033818	323.091	0.942331	0.165661	5.68832	1.28e-08	3.52e-06	CG4712	0.984506	0.989203
FBgn0031249	129.113	1.41366	0.249151	5.67391	1.4e-08	3.74e-06	CG11911	0.99956	1
FBgn0052119	469.818	0.949621	0.167778	5.66	1.51e-08	3.97e-06	CG32119	0.985127	0.989743
FBgn0032783	1139.83	-0.630376	0.111911	-5.63284	1.77e-08	4.55e-06	CG10237	0.657556	0.701449
FBgn0001125	5706.19	-0.54174	0.0964046	-5.61945	1.92e-08	4.81e-06	Got2	0.326953	0.382018
FBgn0250841	188.8	1.19189	0.212652	5.60491	2.08e-08	5.12e-06	CG17242	0.997842	1
FBgn0035434	579.662	-0.861261	0.154296	-5.58187	2.38e-08	5.73e-06	Drsl5	0.963329	0.970571
FBgn0034152	93.1373	1.31767	0.236495	5.57165	2.52e-08	5.95e-06	Acp53C14a	0.999026	1
FBgn0043530	162.644	1.17533	0.211835	5.54832	2.88e-08	6.42e-06	Obp51a	0.997339	0.999798
FBgn0039529	555.391	0.911575	0.164289	5.54861	2.88e-08	6.42e-06	CG5612	0.976596	0.982427
FBgn0002865	1998.2	0.795515	0.143217	5.55461	2.78e-08	6.42e-06	Mst98Ca	0.929242	0.941051
FBgn0038160	106.125	-1.31652	0.237553	-5.54201	2.99e-08	6.53e-06	CG9759	0.998963	1
FBgn0028847	293.988	0.939246	0.169781	5.53209	3.16e-08	6.76e-06	CG9014	0.981543	0.986478
FBgn0004171	496.308	0.889292	0.160826	5.52954	3.21e-08	6.76e-06	Mst98Cb	0.970774	0.977654
FBgn0052064	3541.78	0.799201	0.145353	5.49833	3.83e-08	7.94e-06	S-Lap4	0.929748	0.941402
FBgn0038257	330.287	-0.844433	0.153851	-5.48864	4.05e-08	8.24e-06	smp-30	0.954151	0.962804
FBgn0051233	373.918	1.04869	0.192312	5.45304	4.95e-08	9.9e-06	CG31233	0.992052	0.995174
FBgn0267727	3043.61	0.803377	0.147948	5.43014	5.63e-08	1.09e-05	Pen	0.930068	0.941645
FBgn0038655	376.051	0.881872	0.162379	5.43095	5.61e-08	1.09e-05	CG14297	0.966263	0.973443
FBgn0000053	1173.46	-0.622162	0.115229	-5.39937	6.69e-08	1.27e-05	Gart	0.62659	0.672981
FBgn0036549	223.942	-0.874644	0.162243	-5.39094	7.01e-08	1.31e-05	CG10516	0.962908	0.970312
FBgn0031545	2748.39	0.737652	0.137008	5.38402	7.28e-08	1.34e-05	CG3213	0.867459	0.887783
FBgn0263659	575.062	-0.934596	0.173762	-5.37861	7.51e-08	1.36e-05	lncRNA:CR43650	0.977898	0.983485
FBgn0086915	687.572	0.905137	0.168595	5.36871	7.93e-08	1.42e-05	Mst77F	0.971223	0.977856
FBgn0032945	414.6	-0.763728	0.142597	-5.35584	8.52e-08	1.5e-05	CG8665	0.895014	0.911318
FBgn0036262	1803.97	-0.544373	0.102315	-5.32058	1.03e-07	1.79e-05	CG6910	0.34579	0.401639
FBgn0036778	387.286	0.955535	0.181607	5.26156	1.43e-07	2.44e-05	Cyp312a1	0.979351	0.984526
FBgn0011559	711.449	0.903831	0.172095	5.25192	1.51e-07	2.54e-05	Acp36DE	0.968049	0.975076
FBgn0004427	110.371	-1.33293	0.254494	-5.23756	1.63e-07	2.67e-05	LysD	0.998354	1
FBgn0038598	1252.23	0.845073	0.161316	5.23863	1.62e-07	2.67e-05	CG7131	0.946566	0.955887
FBgn0031946	293.178	0.959003	0.18372	5.21991	1.79e-07	2.85e-05	CG7164	0.979121	0.984379
FBgn0051075	405.969	-0.757558	0.145085	-5.22147	1.78e-07	2.85e-05	CG31075	0.882901	0.901163
FBgn0031859	1540.02	0.803408	0.154733	5.19223	2.08e-07	3.23e-05	CG17377	0.92099	0.934057
FBgn0038208	1533.34	0.763117	0.146938	5.19345	2.06e-07	3.23e-05	CG14355	0.887329	0.904977
FBgn0011669	293.178	1.03087	0.198774	5.18615	2.15e-07	3.29e-05	Mst57Db	0.987561	0.991597
FBgn0034840	1497.65	0.787784	0.152142	5.17794	2.24e-07	3.39e-05	CG3124	0.908751	0.923622
FBgn0035282	98.929	1.11543	0.215801	5.16881	2.36e-07	3.47e-05	CNMa	0.993017	0.995888
FBgn0036704	149.475	1.04489	0.20211	5.16991	2.34e-07	3.47e-05	CG6497	0.988566	0.992521
FBgn0000044	4495.77	0.497565	0.0963925	5.16187	2.44e-07	3.56e-05	Act57B	0.182287	0.227526
FBgn0052591	226.825	1.02245	0.198555	5.14948	2.61e-07	3.76e-05	CG32591	0.986216	0.990499
FBgn0267327	72.4472	1.3175	0.255985	5.1468	2.65e-07	3.77e-05	Acp33A	0.997893	1
FBgn0050350	147.619	1.0542	0.205206	5.13726	2.79e-07	3.92e-05	CG30350	0.988892	0.992764
FBgn0031574	1229.39	0.768757	0.149959	5.12644	2.95e-07	3.96e-05	TTLL4B	0.889831	0.907067
FBgn0027560	9451.97	0.528259	0.102988	5.12933	2.91e-07	3.96e-05	Tps1	0.290959	0.344708
FBgn0028560	244.185	1.01666	0.198264	5.12782	2.93e-07	3.96e-05	sut4	0.985275	0.989807
FBgn0041160	777.415	-0.599878	0.117008	-5.12681	2.95e-07	3.96e-05	comm2	0.550719	0.601795
FBgn0263199	1105	-0.55481	0.108609	-5.10832	3.25e-07	4.31e-05	Galk	0.390651	0.44701
FBgn0083027	722.471	-0.608904	0.119285	-5.10463	3.31e-07	4.35e-05	snoRNA:Psi18S-531	0.579536	0.629031
FBgn0031728	1054.7	0.762458	0.149839	5.08852	3.61e-07	4.58e-05	Hsp60C	0.881907	0.900304
FBgn0031785	622.087	0.76714	0.150703	5.09041	3.57e-07	4.58e-05	CG13991	0.88664	0.904353
FBgn0050376	570.071	0.898182	0.176441	5.09054	3.57e-07	4.58e-05	CG30376	0.962068	0.969715
FBgn0030737	1013.16	-0.701465	0.138221	-5.07494	3.88e-07	4.87e-05	Had1	0.800349	0.830925
FBgn0033371	296.134	0.99255	0.196778	5.04402	4.56e-07	5.66e-05	CNT1	0.980835	0.98585
FBgn0032726	289.49	-0.778551	0.154721	-5.03196	4.85e-07	5.97e-05	CG10621	0.894571	0.910945
FBgn0051029	1438.19	0.79241	0.158756	4.99137	6e-07	7.29e-05	CG31029	0.904344	0.919785
FBgn0041194	1112.73	-0.543125	0.109295	-4.96933	6.72e-07	8.09e-05	Prat2	0.350937	0.407016
FBgn0046294	797.743	0.796405	0.160725	4.95508	7.23e-07	8.62e-05	CG12699	0.905838	0.921118
FBgn0050039	260.101	0.948408	0.191548	4.95128	7.37e-07	8.63e-05	CG30039	0.971113	0.977829
FBgn0023477	2271.6	-0.477463	0.0964402	-4.95087	7.39e-07	8.63e-05	Taldo	0.132495	0.17307
FBgn0036996	228.148	1.10506	0.223644	4.94116	7.77e-07	8.9e-05	mag	0.989979	0.993602
FBgn0004175	370.038	0.908885	0.183935	4.94133	7.76e-07	8.9e-05	Mst84Dd	0.960887	0.968817
FBgn0031720	69.9925	1.26897	0.257299	4.93187	8.14e-07	9.24e-05	CG14013	0.996074	0.998699
FBgn0032076	443.353	-0.706334	0.143294	-4.92928	8.25e-07	9.27e-05	Argl	0.801506	0.831834
FBgn0031920	367.994	0.896184	0.182116	4.92096	8.61e-07	9.41e-05	CG6441	0.956267	0.964775
FBgn0259794	494.569	0.832838	0.16921	4.92193	8.57e-07	9.41e-05	sinah	0.928526	0.940487
FBgn0051538	2331.82	0.755498	0.153509	4.92151	8.59e-07	9.41e-05	CG31538	0.866696	0.887156
FBgn0038708	173.099	0.976789	0.198965	4.90935	9.14e-07	9.89e-05	Scsalpha2	0.975542	0.98152
FBgn0011204	1269.53	0.501697	0.102546	4.89243	9.96e-07	0.000105872	cue	0.208401	0.256216
FBgn0035781	181.51	0.968484	0.197932	4.89302	9.93e-07	0.000105872	CG8560	0.973667	0.979982
FBgn0034907	230.983	0.957337	0.19645	4.87317	1.1e-06	0.000115694	CG5539	0.970988	0.977786
FBgn0031347	1042.11	0.779391	0.160093	4.86837	1.13e-06	0.000117493	nis	0.887716	0.905216
FBgn0029831	2105.73	-0.581411	0.119626	-4.86025	1.17e-06	0.00012134	CG5966	0.488159	0.542123
FBgn0261575	743.393	-0.74995	0.154602	-4.85084	1.23e-06	0.000126136	tobi	0.857054	0.879158
FBgn0038934	926.322	0.763933	0.157959	4.83628	1.32e-06	0.00013341	Gld2	0.871397	0.891195
FBgn0030278	121.679	1.07179	0.221576	4.83713	1.32e-06	0.00013341	CG15200	0.985994	0.990361
FBgn0261599	2235.21	0.731924	0.152063	4.81331	1.48e-06	0.000148442	RpS29	0.833092	0.858571
FBgn0002563	13190.6	-1.08798	0.226653	-4.8002	1.59e-06	0.00015716	Lsp1beta	0.986768	0.990885
FBgn0028513	623.032	0.849871	0.17727	4.79422	1.63e-06	0.000157938	CG9254	0.932462	0.943583
FBgn0032637	335.007	0.818975	0.170758	4.7961	1.62e-06	0.000157938	CG5050	0.914724	0.928821
FBgn0029539	88.8198	1.08706	0.226687	4.79543	1.62e-06	0.000157938	CG11663	0.986618	0.990818
FBgn0052703	395.319	0.816356	0.17051	4.78774	1.69e-06	0.000161798	Erk7	0.912621	0.927004
FBgn0038052	765.477	0.822272	0.172392	4.76979	1.84e-06	0.000175484	vrs	0.915678	0.929709
FBgn0028870	1409.82	0.747793	0.157131	4.75905	1.95e-06	0.000183597	CG4691	0.849963	0.873059
FBgn0003889	920.561	0.718271	0.151011	4.75642	1.97e-06	0.000184529	betaTub85D	0.811321	0.840467
FBgn0002863	302.876	0.990577	0.208331	4.75481	1.99e-06	0.000184538	Acp95EF	0.974231	0.980382
FBgn0034647	119.036	-1.01929	0.214486	-4.75222	2.01e-06	0.000185463	pirk	0.978564	0.983903
FBgn0265263	770.109	0.822424	0.173836	4.73104	2.23e-06	0.000201405	CG42688	0.914032	0.928358
FBgn0259968	115.268	1.18491	0.250467	4.73082	2.24e-06	0.000201405	Sfp60F	0.991697	0.994988
FBgn0039792	866.183	0.755994	0.159709	4.73358	2.21e-06	0.000201405	CG2267	0.857892	0.879901
FBgn0000038	1365.82	-0.545844	0.115578	-4.72272	2.33e-06	0.000208009	nAChRbeta1	0.36751	0.423944
FBgn0038706	452.947	0.890809	0.189056	4.71188	2.45e-06	0.000217745	CG3517	0.947142	0.956387
FBgn0037915	303.62	0.834248	0.177111	4.71031	2.47e-06	0.000217787	CG6790	0.920362	0.933501
FBgn0033283	272.244	0.750667	0.160535	4.67605	2.92e-06	0.000251878	CG11635	0.849012	0.872614
FBgn0033442	289.084	0.880218	0.188192	4.67724	2.91e-06	0.000251878	CG1690	0.941665	0.951427
FBgn0011694	105.521	1.14641	0.245129	4.67675	2.91e-06	0.000251878	EbpII	0.989001	0.992789
FBgn0017448	109.152	1.00747	0.215974	4.66475	3.09e-06	0.000264188	CG2187	0.974783	0.980854
FBgn0262623	126.759	1.15361	0.247602	4.65914	3.18e-06	0.000269536	CG43147	0.98918	0.992884
FBgn0051286	230.992	0.864903	0.186132	4.64673	3.37e-06	0.00028422	CG31286	0.933709	0.944763
FBgn0032677	590.742	0.726269	0.156412	4.6433	3.43e-06	0.000284437	CG5790	0.816849	0.84508
FBgn0019828	398.042	0.871161	0.187631	4.64296	3.43e-06	0.000284437	dj	0.936412	0.946929
FBgn0038248	1007.1	0.706288	0.152145	4.64219	3.45e-06	0.000284437	CG7886	0.787399	0.819646
FBgn0037460	141.74	0.904131	0.195155	4.63288	3.61e-06	0.000295481	sowi	0.949024	0.958122
FBgn0028412	373.484	0.803372	0.173486	4.63075	3.64e-06	0.000296472	Mst33A	0.895975	0.912217
FBgn0259998	152.249	1.05589	0.228288	4.62526	3.74e-06	0.000302355	CG17571	0.980438	0.985535
FBgn0034824	504.958	0.744502	0.161238	4.61741	3.89e-06	0.000311875	Klp59C	0.838782	0.863455
FBgn0052371	345.052	0.877638	0.190179	4.6148	3.93e-06	0.000313683	CG32371	0.938092	0.948277
FBgn0038353	141.973	1.11944	0.243555	4.59627	4.3e-06	0.000340608	CG5399	0.9859	0.990351
FBgn0031914	1455.47	-0.530888	0.115569	-4.59369	4.35e-06	0.000342551	CG5973	0.319927	0.374923
FBgn0051948	692.86	0.756876	0.164906	4.58973	4.44e-06	0.000346797	CG31948	0.851407	0.874312
FBgn0034711	111.76	0.94607	0.20667	4.57769	4.7e-06	0.000364953	Alp2	0.959704	0.968111
FBgn0038694	209.829	0.875213	0.191322	4.57455	4.77e-06	0.00036649	CG5217	0.935376	0.946207
FBgn0039511	545.009	0.811891	0.177499	4.57407	4.78e-06	0.00036649	CG3330	0.89946	0.915291
FBgn0264086	1272.93	0.73472	0.161061	4.56174	5.07e-06	0.000386184	CG43755	0.823767	0.850694
FBgn0031620	269.497	0.918347	0.201706	4.5529	5.29e-06	0.000397651	CG11929	0.950817	0.959684
FBgn0038373	1030.46	0.739063	0.162308	4.55346	5.28e-06	0.000397651	CG4546	0.8288	0.85509
FBgn0028491	905.188	0.620382	0.136432	4.5472	5.44e-06	0.000405984	CG2930	0.602419	0.650493
FBgn0016126	4427.1	-0.391428	0.0861195	-4.54517	5.49e-06	0.000407332	CaMKI	0.0123112	0.0247061
FBgn0041182	2072.52	-0.502641	0.110776	-4.53744	5.69e-06	0.000419913	Tep2	0.228699	0.278731
FBgn0034844	476.028	0.78374	0.173306	4.52228	6.12e-06	0.000445343	CG9861	0.874304	0.893508
FBgn0036895	545.919	0.774601	0.171331	4.52109	6.15e-06	0.000445343	ms(3)76Cc	0.865822	0.886493
FBgn0042710	281.738	0.905396	0.200185	4.52279	6.1e-06	0.000445343	Hex-t2	0.945277	0.95483
FBgn0031784	168.525	0.95788	0.212905	4.4991	6.82e-06	0.000486542	CG9222	0.960076	0.968369
FBgn0001168	2852.2	0.433525	0.0963923	4.4975	6.88e-06	0.000486542	h	0.0580848	0.0857495
FBgn0266750	141.375	-0.847364	0.188422	-4.49717	6.89e-06	0.000486542	lncRNA:CR45223	0.918134	0.931642
FBgn0052548	304.544	0.791035	0.175819	4.49914	6.82e-06	0.000486542	CG32548	0.879416	0.898149
FBgn0036969	155.68	0.96307	0.214374	4.49248	7.04e-06	0.000494424	Spn77Bb	0.961115	0.96892
FBgn0013300	83.6427	1.06168	0.236663	4.48602	7.26e-06	0.000506625	ProtA	0.978012	0.983515
FBgn0259952	65.8201	1.10917	0.248426	4.46479	8.01e-06	0.000556269	Sfp24Bb	0.982576	0.987432
FBgn0034099	73.9942	1.05879	0.237265	4.46247	8.1e-06	0.000559031	CG15708	0.977089	0.982756
FBgn0035776	764.069	0.76713	0.172261	4.4533	8.46e-06	0.000576721	CG8564	0.854861	0.877326
FBgn0052141	222.603	0.777517	0.174578	4.45368	8.44e-06	0.000576721	saturn	0.86498	0.885861
FBgn0051226	627.584	0.809122	0.182039	4.44478	8.8e-06	0.000596597	CG31226	0.890911	0.907845
FBgn0261055	27.9085	1.25057	0.281842	4.43712	9.12e-06	0.000607765	Sfp26Ad	0.990902	0.994444
FBgn0032360	531.01	0.775384	0.174681	4.43885	9.04e-06	0.000607765	CG14926	0.862167	0.883287
FBgn0028567	301.98	0.77888	0.175491	4.43829	9.07e-06	0.000607765	robl62A	0.86542	0.886234
FBgn0030697	591.386	0.760486	0.171475	4.43497	9.21e-06	0.000610411	CG8565	0.84699	0.87084
FBgn0032047	263.19	0.737349	0.166316	4.43343	9.27e-06	0.000611336	CG13088	0.820232	0.847845
FBgn0032314	262.395	0.865085	0.195315	4.42918	9.46e-06	0.000620065	CG7309	0.924243	0.936713
FBgn0032435	102.22	0.979538	0.221507	4.42216	9.77e-06	0.000636999	Oatp33Eb	0.96257	0.970138
FBgn0042627	2768.92	0.973755	0.220864	4.40885	1.04e-05	0.000659781	FASN2	0.960824	0.968817
FBgn0001217	586.047	0.782888	0.177466	4.41149	1.03e-05	0.000659781	Hsc70-2	0.867636	0.887888
FBgn0039071	481.48	0.765099	0.173461	4.41078	1.03e-05	0.000659781	bb8	0.850478	0.873436
FBgn0250832	222.52	0.929002	0.210606	4.41109	1.03e-05	0.000659781	Dup99B	0.948825	0.958004
FBgn0051004	435.562	0.790707	0.179353	4.40867	1.04e-05	0.000659781	mesh	0.87434	0.893508
FBgn0031849	457.589	0.758726	0.172439	4.39996	1.08e-05	0.000683141	CG11327	0.843196	0.867317
FBgn0038463	446.518	-0.566142	0.128721	-4.39822	1.09e-05	0.000684996	CG3534	0.441878	0.497661
FBgn0033705	267.591	0.85708	0.194979	4.39576	1.1e-05	0.000685484	CG13168	0.918587	0.932021
FBgn0035007	254.207	0.899473	0.20461	4.39603	1.1e-05	0.000685484	CG3492	0.937868	0.948211
FBgn0032869	510.322	0.784689	0.178629	4.39283	1.12e-05	0.000691157	CG17470	0.868239	0.888427
FBgn0039010	356.027	0.798301	0.181793	4.39127	1.13e-05	0.000692516	CG4907	0.879707	0.898369
FBgn0029823	942.745	-0.477417	0.109069	-4.37721	1.2e-05	0.000734899	Shmt	0.162057	0.205494
FBgn0032219	202.937	0.830656	0.190167	4.36804	1.25e-05	0.000761992	CG4995	0.90182	0.917535
FBgn0262547	182.78	0.865863	0.198272	4.36705	1.26e-05	0.000761992	CG43101	0.921721	0.934543
FBgn0039070	262.988	0.760504	0.17446	4.35918	1.31e-05	0.000785891	wam	0.842839	0.867025
FBgn0031295	300.803	0.742154	0.170346	4.35675	1.32e-05	0.000790629	CG4375	0.821939	0.849304
FBgn0052026	387.48	0.669926	0.153828	4.35503	1.33e-05	0.000792858	CG32026	0.709637	0.75032
FBgn0036403	305.913	0.823549	0.189174	4.35338	1.34e-05	0.000794823	CG6661	0.896381	0.912473
FBgn0050412	244.385	0.864316	0.198791	4.34786	1.37e-05	0.000811021	CG30412	0.920028	0.933242
FBgn0039787	139.362	0.900698	0.207381	4.34321	1.4e-05	0.000824265	CG9702	0.936057	0.946652
FBgn0051099	140.978	0.859291	0.198391	4.3313	1.48e-05	0.000865818	CG31099	0.916632	0.930438
FBgn0035348	2204.33	-0.403522	0.0934746	-4.31692	1.58e-05	0.000919643	CG16758	0.0261253	0.0450602
FBgn0015008	112.396	0.992844	0.230258	4.31188	1.62e-05	0.000936233	Actn3	0.961754	0.969481
FBgn0040368	94.2428	1.04939	0.243686	4.30633	1.66e-05	0.000955337	eIF4E7	0.971666	0.978134
FBgn0030975	544.193	0.765715	0.177895	4.30431	1.68e-05	0.000959421	SdhBL	0.8452	0.869227
FBgn0031462	228.479	0.796392	0.185129	4.30181	1.69e-05	0.000965608	CG2964	0.873286	0.89274
FBgn0034474	257.954	0.741215	0.172621	4.2939	1.76e-05	0.000992054	Obp56g	0.817315	0.845405
FBgn0030277	434.559	0.820076	0.190995	4.29369	1.76e-05	0.000992054	CG1394	0.890836	0.907845
FBgn0037147	269.596	0.878136	0.204743	4.28897	1.8e-05	0.00100856	CG7140	0.923915	0.936541
FBgn0039817	131.089	-0.901763	0.210386	-4.28623	1.82e-05	0.00101622	CG15553	0.933942	0.944918
FBgn0034506	136.399	0.895711	0.209349	4.27856	1.88e-05	0.00104691	CG13870	0.931143	0.942491
FBgn0037462	79.747	1.00395	0.234986	4.27238	1.93e-05	0.00107132	sunz	0.962709	0.970195
FBgn0052572	202.627	0.826608	0.193626	4.26909	1.96e-05	0.00108213	CG32572	0.893985	0.910506
FBgn0034133	406.897	0.834309	0.195797	4.26108	2.03e-05	0.00111645	knon	0.898578	0.914552
FBgn0030098	124.175	0.997481	0.234399	4.25548	2.09e-05	0.00113947	CG12057	0.960788	0.968817
FBgn0034082	525.151	0.762677	0.179532	4.24815	2.16e-05	0.00117199	CG10734	0.838883	0.863483
FBgn0028531	268.205	0.797952	0.188135	4.24139	2.22e-05	0.00120233	CG15286	0.871206	0.891076
FBgn0038200	897.925	0.736372	0.173788	4.23719	2.26e-05	0.00121941	CG9920	0.808186	0.838103
FBgn0037828	184.29	0.853842	0.201577	4.23582	2.28e-05	0.00122129	tomboy20	0.908879	0.923622
FBgn0039203	132.195	0.825872	0.195097	4.23314	2.3e-05	0.00123037	CG13618	0.891551	0.908184
FBgn0034117	521.959	-0.570378	0.135017	-4.22449	2.39e-05	0.00127285	CG7997	0.456989	0.512478
FBgn0038921	453.45	0.747135	0.17699	4.22133	2.43e-05	0.001285	Theg	0.82024	0.847845
FBgn0038398	1371.49	-0.440456	0.104386	-4.2195	2.45e-05	0.00128969	sxe2	0.0831247	0.116296
FBgn0035952	193.969	0.738818	0.175165	4.21783	2.47e-05	0.00129349	CG5280	0.810122	0.839668
FBgn0030780	308.127	0.794025	0.188329	4.21615	2.49e-05	0.00129742	CG13008	0.866519	0.887079
FBgn0038858	177.292	-0.755836	0.17949	-4.21102	2.54e-05	0.00132141	CG5793	0.82945	0.855565
FBgn0036723	549.088	0.775716	0.184494	4.20457	2.62e-05	0.00135369	CG12229	0.849416	0.872801
FBgn0019936	3517.82	0.560188	0.133387	4.19971	2.67e-05	0.00137699	RpS20	0.426327	0.482311
FBgn0051816	97.361	0.899589	0.214628	4.19138	2.77e-05	0.00140192	CG31816	0.928664	0.940546
FBgn0035047	1252.28	0.608414	0.145108	4.19283	2.75e-05	0.00140192	Pof	0.564194	0.614755
FBgn0035217	212.285	0.800375	0.190932	4.19193	2.77e-05	0.00140192	FucTD	0.870385	0.890469
FBgn0051281	312.037	0.745718	0.177844	4.19311	2.75e-05	0.00140192	Tpl94D	0.81698	0.845142
FBgn0052686	364.39	0.794584	0.189604	4.19075	2.78e-05	0.00140192	CG32686	0.865545	0.886285
FBgn0052445	297.345	0.796444	0.190139	4.18875	2.8e-05	0.00140829	CG32445	0.866985	0.887374
FBgn0032117	241.568	0.76392	0.182692	4.18146	2.9e-05	0.00144198	FucTB	0.836348	0.86155
FBgn0051010	187.471	0.883452	0.211275	4.18153	2.9e-05	0.00144198	CG31010	0.921143	0.934133
FBgn0051025	3194.94	0.595272	0.142505	4.1772	2.95e-05	0.00146307	Ppi1	0.528835	0.580842
FBgn0035196	877.3	0.629832	0.150845	4.17535	2.98e-05	0.00146887	CG9129	0.61694	0.663947
FBgn0034225	236.917	0.860976	0.20637	4.172	3.02e-05	0.00148437	veil	0.909465	0.923879
FBgn0031517	485.411	0.786563	0.188879	4.16438	3.12e-05	0.00152219	CG15406	0.857094	0.879158
FBgn0039152	1623.51	0.407621	0.097875	4.16471	3.12e-05	0.00152219	Root	0.0349991	0.0568176
FBgn0027348	1046.18	0.464065	0.111588	4.15873	3.2e-05	0.00152869	bgm	0.13931	0.180394
FBgn0037985	753.806	0.717298	0.172408	4.16048	3.18e-05	0.00152869	ssp5	0.778629	0.811663
FBgn0038135	191.333	0.941589	0.226388	4.15919	3.19e-05	0.00152869	CG8773	0.942405	0.952093
FBgn0040350	116.742	0.898021	0.215759	4.16214	3.15e-05	0.00152869	CG3690	0.926605	0.938703
FBgn0030936	146.894	0.897501	0.215684	4.16118	3.17e-05	0.00152869	CG6481	0.926339	0.938595
FBgn0031878	516.165	0.731218	0.176004	4.15455	3.26e-05	0.00154442	sip2	0.797007	0.827893
FBgn0052656	1346.39	0.635411	0.152934	4.15481	3.26e-05	0.00154442	Muc11A	0.629252	0.675404
FBgn0032520	433.012	0.689821	0.166104	4.15296	3.28e-05	0.00154898	CG10859	0.736073	0.773937
FBgn0039184	66.0909	0.990821	0.238753	4.14999	3.32e-05	0.00155679	CG6432	0.955426	0.964009
FBgn0011770	426.88	-0.541924	0.130559	-4.15079	3.31e-05	0.00155679	Gip	0.370832	0.427359
FBgn0050293	288.814	0.726591	0.175372	4.14314	3.43e-05	0.0015744	Cht12	0.790337	0.822196
FBgn0050395	206.75	0.776435	0.187388	4.14346	3.42e-05	0.0015744	CG30395	0.846561	0.870475
FBgn0036082	300.558	0.735	0.177394	4.14331	3.42e-05	0.0015744	CG12362	0.801164	0.831626
FBgn0029155	3078.63	-0.370612	0.0894569	-4.14291	3.43e-05	0.0015744	Men-b	0.00828457	0.0176776
FBgn0039797	317.143	0.779991	0.188201	4.14445	3.41e-05	0.0015744	eIF4H2	0.849963	0.873059
FBgn0031128	445.323	0.69843	0.168694	4.14022	3.47e-05	0.00158678	hydra	0.749406	0.785574
FBgn0031925	1428.43	-0.57027	0.137805	-4.13824	3.5e-05	0.00159438	Cyp4d21	0.457546	0.512934
FBgn0040606	1342.6	-0.479555	0.11591	-4.13729	3.51e-05	0.00159482	CG6503	0.181572	0.226705
FBgn0069913	245.759	0.822831	0.198993	4.13497	3.55e-05	0.00160487	CG4681	0.884026	0.902077
FBgn0029659	230.163	0.832147	0.201672	4.12623	3.69e-05	0.00165437	CG16782	0.889839	0.907067
FBgn0052651	172.074	0.976146	0.236553	4.12654	3.68e-05	0.00165437	CG32651	0.950904	0.959684
FBgn0035823	243.262	0.930195	0.225774	4.12003	3.79e-05	0.00169283	eIF4E5	0.936881	0.947323
FBgn0039373	133.578	0.865598	0.210138	4.11919	3.8e-05	0.00169283	CG5024	0.909141	0.923788
FBgn0262002	573.714	0.731461	0.178038	4.10845	3.98e-05	0.00176146	CG42820	0.794703	0.825864
FBgn0034153	57.8349	1.13794	0.277029	4.10764	4e-05	0.00176146	Acp53C14b	0.977038	0.982756
FBgn0034842	114.273	0.898618	0.218808	4.10688	4.01e-05	0.00176146	Prosbeta5R1	0.924139	0.936688
FBgn0036158	36.0705	1.15312	0.280798	4.10656	4.02e-05	0.00176146	CG6149	0.978482	0.983903
FBgn0052690	298.808	0.749746	0.182712	4.10344	4.07e-05	0.00177883	lncRNA:CR32690	0.816439	0.844804
FBgn0014859	1449.52	-0.593483	0.144755	-4.0999	4.13e-05	0.00179296	Hr38	0.523468	0.575912
FBgn0033706	127.23	0.904196	0.220538	4.09995	4.13e-05	0.00179296	Vha36-2	0.926124	0.938458
FBgn0035709	234.851	0.849786	0.207416	4.097	4.19e-05	0.00180888	eIF4E4	0.899159	0.915064
FBgn0037616	484.504	0.769328	0.18794	4.09347	4.25e-05	0.00182995	CG8136	0.836699	0.861836
FBgn0005664	248.92	-0.832273	0.203384	-4.09213	4.27e-05	0.00183382	Crys	0.888004	0.905431
FBgn0051287	169.34	0.783142	0.191416	4.0913	4.29e-05	0.00183382	CG31287	0.849743	0.872985
FBgn0086603	477.764	-0.691653	0.169539	-4.07962	4.51e-05	0.00191456	snoRNA:Or-CD2	0.735423	0.773391
FBgn0051533	344.532	0.726473	0.178064	4.07985	4.51e-05	0.00191456	CG31533	0.786611	0.818898
FBgn0051704	96.6693	0.967748	0.237529	4.07424	4.62e-05	0.00195235	CG31704	0.946468	0.95587
FBgn0036311	766.664	0.66212	0.16267	4.07031	4.69e-05	0.0019749	CG17666	0.682363	0.72483
FBgn0039088	335.635	0.764618	0.187871	4.0699	4.7e-05	0.0019749	CG10164	0.830532	0.856307
FBgn0035078	231.123	0.828925	0.20391	4.06515	4.8e-05	0.00200843	Tpc2	0.884234	0.902211
FBgn0051773	345.125	0.694769	0.170944	4.06431	4.82e-05	0.0020085	CG31773	0.739678	0.777122
FBgn0030033	315.584	0.757199	0.186537	4.05924	4.92e-05	0.0020454	CG1387	0.822084	0.849379
FBgn0031526	202.231	0.863483	0.212793	4.05786	4.95e-05	0.00205033	CG8838	0.904713	0.920081
FBgn0051407	159.875	0.831286	0.204927	4.05651	4.98e-05	0.00205502	CG31407	0.88532	0.903084
FBgn0052652	762.962	0.668213	0.164983	4.0502	5.12e-05	0.00210387	lncRNA:CR32652	0.693081	0.734891
FBgn0037763	302.897	0.775059	0.191648	4.04418	5.25e-05	0.00215109	CG16904	0.839378	0.863917
FBgn0051639	623.083	0.692823	0.17142	4.04166	5.31e-05	0.00216684	CG31639	0.735396	0.773391
FBgn0030859	211.181	0.799986	0.198258	4.03507	5.46e-05	0.00222087	CG12990	0.860943	0.882339
FBgn0085197	931.932	0.668512	0.165731	4.03371	5.49e-05	0.00222616	CG34168	0.692913	0.734779
FBgn0034464	133.946	0.950352	0.235866	4.0292	5.6e-05	0.0022615	CG11018	0.939326	0.949225
FBgn0034459	392.609	0.628027	0.155971	4.02658	5.66e-05	0.00227906	TTLL6A	0.608768	0.65671
FBgn0035461	191.224	0.774753	0.192467	4.02538	5.69e-05	0.00228291	ntc	0.837956	0.862755
FBgn0036346	148.364	0.919901	0.228825	4.0201	5.82e-05	0.00232671	CG11251	0.928366	0.940406
FBgn0038715	37.2106	1.089	0.271068	4.01743	5.88e-05	0.00234534	CG7333	0.968517	0.975465
FBgn0261560	1072.8	0.504026	0.12551	4.01581	5.92e-05	0.00235354	Thor	0.259509	0.311675
FBgn0032771	227.599	0.798263	0.198944	4.0125	6.01e-05	0.00237076	CG17349	0.858177	0.880117
FBgn0038697	289.691	0.735821	0.183381	4.01253	6.01e-05	0.00237076	CG3581	0.794647	0.825864
FBgn0031240	439.801	0.630623	0.157677	3.99947	6.35e-05	0.00249684	CG3345	0.613933	0.661556
FBgn0260461	489.638	0.672633	0.168307	3.99647	6.43e-05	0.00252029	Rcd7	0.69878	0.740535
FBgn0036014	359.233	0.739471	0.185269	3.99134	6.57e-05	0.00256692	CG3222	0.797851	0.828551
FBgn0034416	685.219	0.654148	0.163995	3.98882	6.64e-05	0.00257725	CG15109	0.663442	0.70696
FBgn0036497	126.386	0.878818	0.220281	3.98954	6.62e-05	0.00257725	Ran-like	0.908899	0.923622
FBgn0259971	56.5242	1.0868	0.272531	3.98781	6.67e-05	0.00257972	CG42481	0.967219	0.974324
FBgn0004581	116.395	0.875439	0.219624	3.98609	6.72e-05	0.00259007	bgcn	0.907017	0.922107
FBgn0262102	143.587	0.847222	0.21271	3.983	6.81e-05	0.00259852	CG42855	0.891202	0.907985
FBgn0002562	19.5436	-1.13986	0.286132	-3.98368	6.79e-05	0.00259852	Lsp1alpha	0.973768	0.98
FBgn0013678	18439.4	0.524888	0.131743	3.98419	6.77e-05	0.00259852	mt:Cyt-b	0.324194	0.379207
FBgn0011336	835.285	0.476498	0.119687	3.9812	6.86e-05	0.00260977	Stt3B	0.182407	0.227627
FBgn0053322	190.22	0.708489	0.178272	3.9742	7.06e-05	0.00267054	CG33322	0.755817	0.791239
FBgn0035724	152.423	0.891561	0.224336	3.97422	7.06e-05	0.00267054	CG10064	0.914139	0.928387
FBgn0039478	298.116	0.677296	0.170459	3.97338	7.09e-05	0.00267117	Nep5	0.70598	0.746756
FBgn0000504	1207.4	-0.487982	0.122849	-3.97223	7.12e-05	0.0026756	dsx	0.21493	0.263365
FBgn0035008	234.386	0.717708	0.180799	3.96964	7.2e-05	0.00269622	CG3494	0.768591	0.80283
FBgn0263048	2157.77	0.517108	0.130417	3.96502	7.34e-05	0.00274024	Gpdh3	0.301431	0.355935
FBgn0032525	269.384	0.727863	0.183635	3.96363	7.38e-05	0.00274755	Hsp60D	0.781768	0.814502
FBgn0033047	249.115	0.720826	0.181972	3.9612	7.46e-05	0.00274966	CG7882	0.772353	0.806261
FBgn0033610	237.975	0.758269	0.191411	3.96146	7.45e-05	0.00274966	CG18335	0.817378	0.845405
FBgn0034262	111.468	0.820949	0.207221	3.96171	7.44e-05	0.00274966	swi2	0.872611	0.892281
FBgn0031853	660.432	0.637477	0.161079	3.95754	7.57e-05	0.00278344	TTLL3B	0.627794	0.67409
FBgn0039777	125.827	0.90531	0.229093	3.95171	7.76e-05	0.00284327	Jon99Fii	0.918993	0.932353
FBgn0039796	168.019	0.813618	0.205957	3.95043	7.8e-05	0.00284973	CG12069	0.866546	0.887079
FBgn0037325	67.2724	0.984758	0.249405	3.94844	7.87e-05	0.00286467	CG12147	0.945533	0.955006
FBgn0051198	1517.54	0.959102	0.243044	3.94621	7.94e-05	0.00288246	CG31198	0.938146	0.948277
FBgn0038109	89.5869	0.968706	0.246168	3.93515	8.31e-05	0.00300931	CG11656	0.940487	0.950317
FBgn0267689	220.326	0.731006	0.186419	3.9213	8.81e-05	0.00316888	CG46025	0.783308	0.815963
FBgn0038979	215.892	0.82645	0.210762	3.92125	8.81e-05	0.00316888	tHMG2	0.874057	0.893373
FBgn0030280	148.086	0.821602	0.209567	3.92048	8.84e-05	0.00316934	CG11106	0.87059	0.890524
FBgn0033593	70.895	-0.900032	0.230346	-3.9073	9.33e-05	0.00333263	Listericin	0.914314	0.928485
FBgn0037664	146.036	0.782581	0.200308	3.90689	9.35e-05	0.00333263	CG8420	0.838074	0.862801
FBgn0037035	218.08	0.757101	0.194422	3.89412	9.86e-05	0.00350266	CG10589	0.812026	0.840976
FBgn0013675	10601.6	0.524377	0.134712	3.89256	9.92e-05	0.00351456	mt:CoII	0.326448	0.381541
FBgn0032055	356.252	0.703176	0.180712	3.89113	9.98e-05	0.00352478	Sgp	0.743493	0.780555
FBgn0250844	296.443	0.739848	0.19024	3.88902	0.000100649	0.00354495	CG4218	0.792223	0.823867
FBgn0035491	256.517	0.785726	0.202136	3.88712	0.00010144	0.00356217	Dpy-30L2	0.839696	0.864111
FBgn0035611	31.7624	1.08312	0.278821	3.88465	0.000102477	0.00358791	CG13285	0.963004	0.970326
FBgn0037483	268.812	0.708305	0.182504	3.88103	0.000104015	0.00363097	CG14609	0.750427	0.786225
FBgn0035034	96.3718	0.920545	0.237293	3.87936	0.000104734	0.00364529	CG3565	0.92135	0.934262
FBgn0031461	3315.53	0.370728	0.0956105	3.87748	0.000105542	0.00366263	daw	0.0125227	0.0250539
FBgn0038236	2280.18	-0.407786	0.105258	-3.87417	0.000106988	0.00370191	Cyp313a1	0.046162	0.0705775
FBgn0019643	1125.47	-0.442637	0.114278	-3.87332	0.000107362	0.00370398	speck	0.106488	0.143173
FBgn0031617	112.863	0.806117	0.2082	3.87185	0.000108014	0.00370678	CG15635	0.855933	0.878273
FBgn0038078	50.7698	1.02142	0.263816	3.87172	0.000108071	0.00370678	CG14391	0.950977	0.959684
FBgn0031746	62.2289	0.973976	0.251655	3.87028	0.00010871	0.00370712	CG9029	0.938926	0.948903
FBgn0011743	130.644	0.91233	0.23571	3.87056	0.000108584	0.00370712	Arp53D	0.917562	0.931222
FBgn0032276	575.07	0.706129	0.182532	3.86852	0.000109498	0.00372323	dbf	0.746594	0.782974
FBgn0035779	165.294	0.877121	0.227009	3.86382	0.000111627	0.0037631	CG8562	0.900951	0.91673
FBgn0036784	220.365	0.725808	0.187845	3.86388	0.000111602	0.0037631	CG5103	0.773312	0.80719
FBgn0032371	226.855	0.833734	0.216009	3.85971	0.000113519	0.00379765	CG4983	0.875271	0.894227
FBgn0015039	1124.61	-0.407216	0.10551	-3.8595	0.000113617	0.00379765	Cyp9b2	0.0460292	0.0704292
FBgn0261561	498.459	0.624441	0.161744	3.86066	0.000113079	0.00379765	CG42675	0.596415	0.644917
FBgn0028848	730.914	0.665904	0.172646	3.85705	0.000114762	0.00381798	Gpo3	0.680405	0.723206
FBgn0050378	153.095	0.849672	0.220304	3.85682	0.000114873	0.00381798	CG30378	0.885234	0.903075
FBgn0013811	308.622	0.667662	0.173162	3.85571	0.000115397	0.00382462	Dhc62B	0.683527	0.725805
FBgn0035143	193.116	0.783512	0.203308	3.85381	0.000116294	0.00383034	Ppm1	0.835614	0.86087
FBgn0035857	158.571	0.814751	0.211443	3.85329	0.000116543	0.00383034	CG8006	0.861429	0.882704
FBgn0029750	260.698	0.667374	0.173186	3.85351	0.000116434	0.00383034	CG3323	0.682912	0.725217
FBgn0034957	124.113	0.839877	0.218143	3.85012	0.000118058	0.00386936	Rsph4a	0.878711	0.897507
FBgn0038258	228.596	0.680775	0.176896	3.84845	0.000118865	0.00388502	CG7362	0.705964	0.746756
FBgn0036763	1221.36	0.543292	0.141201	3.84764	0.00011926	0.00388716	TrpRS-m	0.383954	0.440544
FBgn0030594	422.701	0.701278	0.182353	3.84572	0.000120197	0.00390689	fiz	0.738218	0.775984
FBgn0030951	54.9485	0.97599	0.253878	3.84433	0.000120883	0.0039184	CG6873	0.938246	0.948297
FBgn0039241	1292.59	-0.42626	0.111153	-3.83491	0.00012561	0.00406048	CG11089	0.0766766	0.108315
FBgn0027615	307.267	0.635122	0.165685	3.83331	0.000126432	0.00406971	OXA1L	0.618957	0.665874
FBgn0027376	371.397	0.652656	0.170272	3.83301	0.000126586	0.00406971	rha	0.654522	0.698781
FBgn0037086	273.148	0.746043	0.194853	3.82875	0.000128796	0.00412953	CG7202	0.79579	0.826775
FBgn0038395	268.17	0.700251	0.183112	3.82418	0.000131208	0.00419547	CG10407	0.735525	0.773429
FBgn0036285	457.831	0.506004	0.132369	3.82268	0.00013201	0.00420969	toe	0.275418	0.328242
FBgn0040859	652.204	0.646766	0.169326	3.81965	0.000133641	0.00425022	lncRNA:CR32658	0.642442	0.687993
FBgn0042201	2550.63	-0.418156	0.109549	-3.81707	0.000135045	0.00428334	Nplp3	0.0639212	0.0929576
FBgn0266903	15.6023	1.08432	0.2843	3.81398	0.000136746	0.00429114	lncRNA:CR45363	0.960492	0.968706
FBgn0069354	211.557	0.759559	0.199128	3.81442	0.000136504	0.00429114	Porin2	0.809703	0.839307
FBgn0033330	178.046	0.829395	0.217454	3.81413	0.000136666	0.00429114	CG8746	0.869508	0.889649
FBgn0013680	2949.93	0.505178	0.132405	3.8154	0.000135962	0.00429114	mt:ND2	0.273394	0.326258
FBgn0003380	10032.6	-0.45608	0.119661	-3.81143	0.000138163	0.00432409	Sh	0.140726	0.182007
FBgn0058006	368.959	-0.617262	0.162128	-3.80724	0.000140528	0.00438648	CG40006	0.578954	0.628622
FBgn0028892	256.843	0.738769	0.194134	3.80546	0.000141544	0.00439253	CG4161	0.785898	0.8183
FBgn0051601	124.009	0.874478	0.229827	3.80494	0.000141839	0.00439253	CG31601	0.896113	0.91228
FBgn0051419	20.6625	1.08898	0.286116	3.80608	0.000141184	0.00439253	CG31419	0.960931	0.968817
FBgn0035154	68.4101	0.976551	0.257208	3.79673	0.000146615	0.00452856	hiro	0.936053	0.946652
FBgn0031585	652.069	0.648745	0.171018	3.79343	0.000148582	0.00456828	CG2955	0.645411	0.690742
FBgn0030247	223.824	0.769184	0.202776	3.79327	0.000148675	0.00456828	CG15208	0.818192	0.846173
FBgn0051870	286.36	0.73234	0.193148	3.7916	0.000149682	0.00458727	CG31870	0.777277	0.810612
FBgn0015584	71.4018	0.97444	0.257359	3.78631	0.0001529	0.00467374	Acp53Ea	0.934907	0.945813
FBgn0013684	10338.8	0.451347	0.119319	3.78269	0.000155141	0.00472999	mt:ND5	0.131395	0.171889
FBgn0036729	157.275	0.759821	0.200927	3.78157	0.000155839	0.00473904	CG13733	0.80792	0.837901
FBgn0029859	220.643	0.824976	0.218228	3.78034	0.000156613	0.00475033	CG15892	0.864297	0.885315
FBgn0038701	103.64	0.868102	0.229733	3.77875	0.000157618	0.00476854	CG18493	0.891114	0.907974
FBgn0083960	167.102	0.739393	0.195737	3.77748	0.000158423	0.00478066	CG34124	0.784935	0.817586
FBgn0034363	97.9916	0.861673	0.228147	3.77684	0.000158832	0.00478076	CG5327	0.887409	0.90498
FBgn0034882	76.3267	0.89063	0.236014	3.77363	0.000160889	0.00481809	Eglp1	0.902361	0.918007
FBgn0087002	108389	-0.391064	0.103626	-3.77381	0.000160772	0.00481809	apolpp	0.0306624	0.0512227
FBgn0035661	88.3188	0.961876	0.255029	3.77163	0.000162185	0.00484462	CG10477	0.930286	0.941784
FBgn0038361	88.7187	0.924926	0.245863	3.76196	0.000168586	0.0050231	Uros2	0.916627	0.930438
FBgn0037862	248.735	0.679316	0.180723	3.75888	0.000170673	0.00507246	mAcon2	0.699196	0.740842
FBgn0035161	148.043	0.795276	0.211731	3.75606	0.000172611	0.00511716	CG13898	0.839718	0.864111
FBgn0063497	627.398	-0.442336	0.117864	-3.75293	0.000174782	0.00513842	GstE3	0.113123	0.150856
FBgn0000615	2309.19	0.579006	0.154298	3.75251	0.000175069	0.00513842	exu	0.484604	0.538886
FBgn0050275	205.696	0.763214	0.203364	3.75294	0.000174774	0.00513842	CG30275	0.809624	0.8393
FBgn0035124	233.122	0.718175	0.191318	3.75383	0.000174153	0.00513842	ttm2	0.756876	0.792137
FBgn0036824	3408.19	-0.388073	0.103438	-3.75176	0.000175599	0.00514117	CG3902	0.02849	0.0483174
FBgn0028850	126.788	0.868069	0.23155	3.74895	0.000177575	0.00517335	CG15260	0.889271	0.906644
FBgn0011670	52.1494	0.953892	0.254424	3.74922	0.000177388	0.00517335	Mst57Dc	0.926478	0.938655
FBgn0031085	159.387	0.843989	0.225365	3.74499	0.000180397	0.00524263	CG9570	0.874798	0.893861
FBgn0031101	65.6468	0.936209	0.250147	3.74264	0.000182098	0.00527904	CG1631	0.919865	0.933157
FBgn0035358	98.4316	0.876405	0.234315	3.74028	0.000183818	0.00531586	CG14949	0.893214	0.909799
FBgn0051913	148.037	0.777067	0.207845	3.73868	0.000184986	0.00532353	CG31913	0.822327	0.849481
FBgn0039501	573.846	0.646084	0.172805	3.73881	0.000184892	0.00532353	TTLL6B	0.638219	0.683666
FBgn0034546	245.507	0.689829	0.184572	3.73745	0.000185899	0.00533679	CG13442	0.715037	0.754712
FBgn0032626	119.977	0.911344	0.24409	3.73364	0.000188736	0.00540508	CG12620	0.909411	0.923879
FBgn0050429	56.9383	0.945677	0.253453	3.73117	0.000190592	0.00544502	CG30429	0.922661	0.93535
FBgn0036165	11317	-0.341217	0.0915004	-3.72913	0.000192143	0.00547608	chrb	0.00386231	0.00923602
FBgn0259101	140.907	0.824569	0.221373	3.7248	0.000195468	0.0055574	CG42249	0.860456	0.881916
FBgn0262097	152.695	0.826401	0.222145	3.72009	0.00019915	0.00564847	lncRNA:CR42850	0.861448	0.882704
FBgn0263468	885.097	-0.552337	0.148799	-3.71196	0.00020566	0.00581915	snoRNA:SC35-a	0.413223	0.469604
FBgn0037988	280.99	0.694116	0.187273	3.70644	0.000210191	0.00593311	CG14740	0.720006	0.759548
FBgn0052440	126.366	0.806772	0.217966	3.70137	0.000214436	0.00603849	CG32440	0.845575	0.869536
FBgn0038607	318.666	0.710978	0.192223	3.69871	0.000216695	0.00607311	hmw	0.743949	0.780825
FBgn0039519	165.237	0.809241	0.21878	3.69889	0.000216545	0.00607311	Cyp6a18	0.847351	0.871134
FBgn0038163	503.99	0.646091	0.174772	3.69677	0.000218361	0.00610531	CG10841	0.636741	0.682144
FBgn0031689	1421.86	-0.366373	0.0993489	-3.68774	0.000226253	0.00625189	Cyp28d1	0.0138957	0.0272734
FBgn0015623	4410.41	0.326771	0.0886043	3.68798	0.000226041	0.00625189	Cpr	0.00178424	0.00470241
FBgn0086254	911.18	-0.397162	0.107646	-3.68952	0.000224679	0.00625189	Akr1B	0.040526	0.0637965
FBgn0250831	46.6522	1.03239	0.279867	3.68885	0.000225266	0.00625189	BG642167	0.945057	0.95469
FBgn0031171	186.971	0.804336	0.218047	3.68882	0.000225295	0.00625189	CG1801	0.842813	0.867025
FBgn0028893	174.203	0.749377	0.203241	3.68714	0.000226791	0.00625212	CG31819	0.790732	0.822437
FBgn0051523	4282.74	0.318345	0.0864099	3.68412	0.000229491	0.0063118	CG31523	0.00101604	0.00289799
FBgn0262679	36.8413	-1.05368	0.28613	-3.68253	0.000230927	0.00633653	CG43149	0.949303	0.958323
FBgn0050355	112.719	0.830087	0.225455	3.68183	0.000231565	0.0063393	CG30355	0.861535	0.882716
FBgn0000015	213.765	0.719318	0.195421	3.68086	0.000232448	0.00634874	Abd-B	0.754121	0.789675
FBgn0034800	240.555	0.721358	0.196108	3.67837	0.000234732	0.00639631	CG3788	0.756632	0.791953
FBgn0033190	221.69	0.660277	0.179837	3.67153	0.000241106	0.00655486	Gpo2	0.662317	0.705952
FBgn0026196	231.42	0.578614	0.157669	3.66979	0.000242748	0.00658434	nop5	0.483941	0.538351
FBgn0262028	13.2342	1.00853	0.275482	3.66097	0.000251266	0.00678456	lncRNA:CR42839	0.93792	0.948211
FBgn0039491	284.697	0.67347	0.18396	3.66095	0.00025128	0.00678456	CG6059	0.684785	0.726879
FBgn0036970	205.958	0.7112	0.1945	3.65656	0.000255623	0.00688606	Spn77Bc	0.741843	0.779031
FBgn0029501	297.289	0.625527	0.17118	3.6542	0.000257987	0.00693393	Crtp	0.593659	0.642409
FBgn0031034	51.1841	0.988513	0.270573	3.6534	0.000258791	0.00693971	CG14205	0.93208	0.943277
FBgn0032632	194.897	0.719326	0.197012	3.65119	0.000261032	0.00698395	CG6380	0.752383	0.787994
FBgn0030933	201.846	0.786921	0.215865	3.64543	0.000266945	0.00712599	CG6470	0.825255	0.851908
FBgn0086778	1877.04	-0.367031	0.100765	-3.64244	0.000270065	0.00719298	nAChRalpha7	0.0152794	0.0294836
FBgn0038575	148.574	0.771967	0.212048	3.64052	0.000272088	0.00723054	CG7208	0.811083	0.840404
FBgn0032481	3167.85	0.464015	0.127513	3.63895	0.000273747	0.0072583	CG16972	0.171435	0.215532
FBgn0038136	193.401	0.821742	0.225973	3.63645	0.000276417	0.00731266	CG8774	0.852639	0.87534
FBgn0001112	271.284	0.612277	0.168551	3.6326	0.000280585	0.00740632	Gld	0.564369	0.614888
FBgn0034467	447.928	0.586232	0.161435	3.63138	0.000281908	0.00742463	CG15128	0.503137	0.556608
FBgn0262825	35.0739	0.990893	0.272969	3.63005	0.000283362	0.0074463	lncRNA:CR43196	0.931505	0.942776
FBgn0027657	881.248	-0.380423	0.104871	-3.62751	0.000286163	0.00750318	glob1	0.0255651	0.0442883
FBgn0003429	7411.9	-0.383847	0.105902	-3.62456	0.000289449	0.00757254	slo	0.028777	0.0486799
FBgn0032740	69.5596	0.918694	0.253624	3.62227	0.000292029	0.00762312	CG15172	0.905888	0.921118
FBgn0261287	399.367	0.654577	0.180768	3.62108	0.000293371	0.00764125	ymp	0.64992	0.694874
FBgn0051921	390.311	0.598071	0.165348	3.61705	0.000297979	0.00774416	CG31921	0.531595	0.583548
FBgn0038012	13.7569	1.00989	0.279386	3.6147	0.000300699	0.00779769	CG10013	0.935864	0.946619
FBgn0031722	116.566	0.817707	0.22634	3.61274	0.000302981	0.00783963	CG14011	0.848095	0.871823
FBgn0038280	139.073	0.858042	0.237551	3.61203	0.000303805	0.00784375	CG14861	0.874838	0.893861
FBgn0034052	12.2397	0.987785	0.273639	3.60981	0.000306418	0.00789395	CG8299	0.929503	0.941234
FBgn0036329	207.992	0.744619	0.206364	3.60827	0.000308242	0.00792362	CG11262	0.780435	0.81333
FBgn0031522	42.7964	0.992082	0.275122	3.60598	0.000310983	0.00795941	CG3285	0.930534	0.941955
FBgn0034121	1005.25	0.610245	0.169211	3.60641	0.00031046	0.00795941	CG6262	0.559386	0.610023
FBgn0083965	43.6412	0.964025	0.267476	3.60415	0.000313171	0.00799806	CG34129	0.921785	0.934543
FBgn0263597	152.251	0.794302	0.22047	3.60276	0.000314853	0.00801339	Acp98AB	0.828821	0.85509
FBgn0264821	262.169	-0.608986	0.169044	-3.60253	0.000315129	0.00801339	asRNA:CR44029	0.556506	0.607275
FBgn0050156	163.475	0.735654	0.204478	3.59772	0.000321024	0.00814572	CG30156	0.769426	0.80349
FBgn0032448	70.5392	0.924321	0.257118	3.59493	0.000324475	0.00821561	CG5781	0.906559	0.92172
FBgn0036482	198.396	0.774778	0.215583	3.59387	0.0003258	0.00823152	CG13457	0.810699	0.840118
FBgn0035871	643.084	0.512362	0.142599	3.59303	0.000326854	0.0082405	BI-1	0.305333	0.360001
FBgn0020414	508.791	0.551875	0.15363	3.59224	0.000327843	0.0082478	Idgf3	0.414739	0.47098
FBgn0050042	86.93	0.831373	0.231512	3.59106	0.000329337	0.00826777	Cpr49Ab	0.856415	0.878615
FBgn0263354	4426.05	-0.363379	0.101258	-3.58865	0.000332393	0.00829159	CG42784	0.0143235	0.0279781
FBgn0036214	102.98	0.8729	0.243215	3.58901	0.000331934	0.00829159	CG7264	0.88177	0.900242
FBgn0038845	70.8545	0.954972	0.266109	3.58865	0.000332394	0.00829159	Alp5	0.917803	0.931386
FBgn0010497	151.067	0.722967	0.201609	3.58599	0.000335803	0.0083486	dmGlut	0.753175	0.788754
FBgn0053653	6024.22	-0.341031	0.095107	-3.58576	0.000336095	0.0083486	Cadps	0.00516159	0.011816
FBgn0031410	208.839	0.745304	0.207906	3.58482	0.000337315	0.00835722	CG17237	0.779713	0.81272
FBgn0003545	56.5924	0.919337	0.2565	3.58416	0.000338169	0.00835722	sub	0.903816	0.919327
FBgn0013685	439.662	0.62304	0.173847	3.58385	0.000338567	0.00835722	mt:ND6	0.586687	0.636032
FBgn0040609	109.702	0.826921	0.230783	3.5831	0.000339538	0.0083637	CG3348	0.852778	0.87534
FBgn0030015	72.4756	0.877147	0.244954	3.58087	0.000342458	0.00841806	CG10761	0.883529	0.901647
FBgn0035497	4478.6	0.470114	0.131332	3.57959	0.000344133	0.00844164	CG14995	0.190926	0.237179
FBgn0032530	134.808	0.874029	0.244287	3.57787	0.000346404	0.00846215	CG9263	0.881656	0.900203
FBgn0037385	53.4787	0.955526	0.26704	3.57822	0.000345945	0.00846215	glob3	0.917382	0.931119
FBgn0260959	1515.02	0.456872	0.127749	3.57633	0.000348451	0.00849457	MCPH1	0.15801	0.200998
FBgn0083943	152.623	0.758542	0.212226	3.57421	0.00035128	0.00854589	CG34107	0.793293	0.824689
FBgn0250842	98.272	0.877296	0.245753	3.56983	0.000357208	0.00862055	CG17575	0.882887	0.901163
FBgn0035273	110.409	0.832555	0.233168	3.57063	0.000356122	0.00862055	CG12020	0.855852	0.878267
FBgn0035670	586.706	0.953129	0.266955	3.57037	0.000356477	0.00862055	CG10472	0.916073	0.93003
FBgn0030828	893.974	0.496959	0.139212	3.56979	0.000357272	0.00862055	CG5162	0.263643	0.316023
FBgn0034132	1902.14	0.83807	0.234887	3.56797	0.000359763	0.00866295	S-Lap8	0.859387	0.881128
FBgn0033888	284.453	0.667618	0.187429	3.56199	0.000368057	0.00884462	CG18568	0.670393	0.713658
FBgn0032004	109.717	0.793393	0.222892	3.55953	0.000371513	0.00887775	CG8292	0.825136	0.85186
FBgn0035707	1078.1	0.537579	0.15103	3.55941	0.000371693	0.00887775	Rexo5	0.376861	0.433333
FBgn0011693	7635.91	-0.36196	0.101672	-3.56008	0.000370746	0.00887775	Pdh	0.0141412	0.0276677
FBgn0032636	171.967	0.713842	0.20062	3.55819	0.000373424	0.00890106	CG5043	0.739696	0.777122
FBgn0032151	2658.9	-0.395129	0.111069	-3.55753	0.000374364	0.00890549	nAChRalpha6	0.0437115	0.0676641
FBgn0038993	122.767	0.788437	0.221784	3.55498	0.000378008	0.00897408	CG13843	0.820545	0.847937
FBgn0042133	135.833	0.729227	0.205184	3.55402	0.000379386	0.0089887	CG18810	0.759003	0.794082
FBgn0031501	192.461	0.755926	0.212802	3.55224	0.000381962	0.00903159	CG17261	0.789126	0.821081
FBgn0038952	549.879	0.591504	0.166797	3.54625	0.000390762	0.00922121	CG7069	0.515642	0.568522
FBgn0031741	139.663	0.795967	0.224638	3.54333	0.000395113	0.00928673	CG11034	0.826214	0.852824
FBgn0264255	11067.7	-0.360602	0.101758	-3.54373	0.000394515	0.00928673	para	0.0137325	0.0270114
FBgn0013672	16391.2	0.453566	0.128048	3.54216	0.000396865	0.00930937	mt:ATPase6	0.15241	0.194812
FBgn0033464	377.524	-0.516489	0.145929	-3.53931	0.000401175	0.00935466	CG1441	0.319456	0.374445
FBgn0040324	2209.05	-0.35146	0.0992898	-3.53974	0.000400529	0.00935466	Ephrin	0.00934321	0.0195612
FBgn0029963	117.571	0.82748	0.233749	3.54003	0.000400086	0.00935466	CG10920	0.850251	0.873278
FBgn0029951	150.763	0.743784	0.210202	3.53842	0.000402524	0.00936761	CG11369	0.775045	0.808572
FBgn0002593	6246.13	0.420485	0.118939	3.53529	0.000407326	0.00946071	RpLP1	0.0833523	0.116545
FBgn0053233	173.733	0.755772	0.213851	3.5341	0.000409169	0.00948484	CG33233	0.787776	0.819893
FBgn0031723	251.617	0.756371	0.21421	3.53097	0.000414035	0.00957881	CG7251	0.788199	0.820189
FBgn0265576	95.9993	0.841611	0.23847	3.52921	0.000416796	0.00960502	CG44403	0.859088	0.880897
FBgn0031134	109.977	0.777812	0.220367	3.52961	0.000416166	0.00960502	CG1314	0.809248	0.838996
FBgn0031913	240.281	-0.637139	0.180583	-3.52824	0.000418332	0.00962163	CG5958	0.613685	0.661348
FBgn0025936	2261.28	-0.347526	0.098519	-3.5275	0.000419504	0.00962982	Eph	0.00797494	0.0171074
FBgn0264794	333.929	-0.576574	0.163538	-3.52563	0.000422474	0.00967916	lncRNA:CR44024	0.479545	0.533864
FBgn0050384	115.562	0.841412	0.23879	3.52364	0.000425658	0.00972264	CG30384	0.858578	0.880451
FBgn0033294	135.673	-0.827936	0.235061	-3.52222	0.000427953	0.00972264	Mal-A4	0.849353	0.872801
FBgn0035316	166.282	0.706146	0.200465	3.52253	0.000427441	0.00972264	CG15878	0.727248	0.766092
FBgn0039527	192.119	0.688431	0.195472	3.52188	0.000428492	0.00972264	CG5639	0.70171	0.742839
FBgn0030191	375.179	0.682037	0.193645	3.52209	0.000428156	0.00972264	CG15306	0.691919	0.733858
FBgn0261835	288.024	0.656648	0.186511	3.52069	0.000430431	0.0097479	lncRNA:CR42767	0.649639	0.694637
FBgn0051709	222.94	0.754581	0.214734	3.51403	0.000441364	0.00997635	CG31709	0.785207	0.817797
FBgn0036085	104.119	0.813612	0.23197	3.50739	0.000452518	0.0101894	CG6527	0.837856	0.862727
FBgn0036211	1407.56	-0.33293	0.0949108	-3.50782	0.000451795	0.0101894	CG5946	0.00395994	0.00942554
FBgn0032624	184.545	0.72791	0.207615	3.50605	0.000454804	0.0102214	CG6304	0.754438	0.789936
FBgn0036698	156.694	-0.689324	0.196688	-3.50466	0.000457188	0.0102554	CG7724	0.70215	0.743104
FBgn0013301	244.105	0.655696	0.187141	3.50376	0.000458746	0.0102709	ProtB	0.647274	0.692485
FBgn0033461	75.1014	0.846532	0.241976	3.49841	0.000468046	0.01042	CG12923	0.860145	0.881751
FBgn0033860	183.138	0.74096	0.211785	3.49864	0.000467637	0.01042	S-Lap5	0.769313	0.803442
FBgn0025111	297.315	0.648814	0.18546	3.4984	0.000468058	0.01042	Ant2	0.634684	0.680373
FBgn0011556	26.5737	0.997754	0.28537	3.49635	0.000471665	0.0104805	zetaTry	0.925984	0.938396
FBgn0012034	7254.78	-0.328619	0.0940027	-3.49585	0.000472551	0.0104805	AcCoAS	0.00319589	0.0078216
FBgn0260480	129.021	0.76115	0.217827	3.49428	0.000475342	0.0105226	CG32295	0.790696	0.822437
FBgn0051872	432.358	0.642501	0.184246	3.48718	0.000488139	0.010737	CG31872	0.62259	0.669173
FBgn0263980	9066.49	-0.314191	0.090132	-3.4859	0.000490484	0.010737	Stacl	0.00133157	0.0036667
FBgn0034205	135.102	0.742419	0.212848	3.48803	0.0004866	0.010737	CG10950	0.770278	0.804236
FBgn0004172	376.207	0.620473	0.177983	3.48613	0.00049007	0.010737	Mst84Da	0.57907	0.628641
FBgn0038567	83.1807	0.803941	0.230599	3.48632	0.000489715	0.010737	CG14316	0.828845	0.85509
FBgn0031127	91.0557	0.847391	0.24308	3.48606	0.000490199	0.010737	CG1835	0.859839	0.881514
FBgn0031905	135.227	0.848805	0.243857	3.48074	0.000500024	0.0109053	gudu	0.860363	0.881899
FBgn0034846	57.6131	0.931978	0.267729	3.48106	0.000499442	0.0109053	CG9863	0.902538	0.918107
FBgn0034479	924.493	0.371245	0.106723	3.47858	0.000504087	0.0109737	CG8654	0.0226135	0.0403424
FBgn0033168	45.41	0.912846	0.262597	3.47622	0.000508527	0.0110296	CG11145	0.894098	0.910542
FBgn0034472	288.724	0.718621	0.206711	3.47644	0.000508109	0.0110296	CG8517	0.741053	0.778339
FBgn0262867	649.996	0.43735	0.125842	3.47539	0.000510107	0.0110436	Ptr	0.120397	0.159299
FBgn0028669	209.629	0.638662	0.184009	3.47081	0.000518882	0.011213	Vha100-3	0.614793	0.662361
FBgn0085771	164347	-0.276189	0.0796224	-3.46874	0.000522913	0.0112794	28SrRNA-Psi:CR40741	5.26657e-05	0.000228414
FBgn0040349	220.454	-0.627342	0.180939	-3.46714	0.000526019	0.0113257	CG3699	0.592592	0.641666
FBgn0039778	68.2082	0.887615	0.256107	3.4658	0.000528649	0.0113616	Jon99Fi	0.881347	0.899966
FBgn0035878	328.074	0.51388	0.148396	3.46288	0.00053442	0.0114648	CG7182	0.315967	0.370871
FBgn0035455	122.465	0.795094	0.229659	3.46206	0.000536061	0.0114791	CG10862	0.819896	0.847638
FBgn0037195	81.4639	0.810372	0.234196	3.46023	0.000539705	0.0115362	CG11226	0.832097	0.857695
FBgn0004652	2293.72	-0.353882	0.102298	-3.45933	0.000541528	0.0115542	fru	0.0119447	0.0240813
FBgn0034364	224.438	-0.576497	0.166957	-3.45296	0.000554471	0.011795	CG5493	0.47978	0.534075
FBgn0263451	36.0777	0.952814	0.275955	3.45279	0.000554813	0.011795	asRNA:CR43474	0.908737	0.923622
FBgn0035620	103.726	0.795131	0.230475	3.44997	0.00056064	0.0118975	Alp9	0.819088	0.846877
FBgn0086667	189.312	-0.67711	0.196334	-3.44876	0.000563169	0.0119297	snoRNA:Psi28S-3342	0.680587	0.723334
FBgn0266414	775.728	-0.572467	0.166142	-3.44566	0.000569667	0.0120457	lncRNA:CR45054	0.470024	0.524651
FBgn0263456	2526.21	-0.334589	0.0971506	-3.44403	0.00057312	0.012097	nwk	0.00498068	0.0114619
FBgn0036218	201.882	0.631202	0.183619	3.43756	0.00058699	0.0123677	Sprn	0.59941	0.647741
FBgn0051682	89.7072	0.809879	0.23583	3.43416	0.000594389	0.012479	Tengl1	0.829888	0.855942
FBgn0036437	167.97	0.760087	0.221327	3.43423	0.00059424	0.012479	CG5048	0.7856	0.818134
FBgn0038960	69.4025	0.840809	0.244971	3.43228	0.000598533	0.0125437	CG13855	0.851848	0.874615
FBgn0033644	30.0644	0.958807	0.279745	3.42743	0.00060933	0.0127473	Tret1-2	0.909286	0.923856
FBgn0016684	157.616	0.691092	0.201703	3.42629	0.00061189	0.0127782	NaPi-T	0.700614	0.742078
FBgn0051141	134.176	0.770464	0.225056	3.42343	0.000618364	0.0128906	CG31141	0.7951	0.826204
FBgn0003187	301.358	0.629229	0.183931	3.42101	0.000623883	0.0129827	qua	0.595095	0.643726
FBgn0010551	668.007	0.423029	0.123807	3.41684	0.000633514	0.0131368	Phb2	0.0954445	0.130211
FBgn0036703	102.516	0.749889	0.219438	3.41732	0.000632405	0.0131368	CG7707	0.77385	0.807609
FBgn0031531	64.0334	0.927939	0.271824	3.41375	0.000640742	0.0132398	CG8840	0.896483	0.912498
FBgn0050487	72.9614	0.884934	0.259213	3.41392	0.000640346	0.0132398	CG30487	0.876412	0.895315
FBgn0053092	506.863	0.631388	0.184979	3.41329	0.000641847	0.0132398	P5CDh2	0.599083	0.647447
FBgn0032590	657.846	0.562941	0.164965	3.41249	0.00064373	0.0132555	CG4631	0.446901	0.502358
FBgn0033868	4283.76	0.752867	0.220804	3.40966	0.000650446	0.0133704	S-Lap7	0.776499	0.809872
FBgn0011606	535.843	0.581102	0.170598	3.40627	0.000658581	0.0135141	Klp3A	0.490974	0.544736
FBgn0037994	123.496	0.745736	0.219046	3.40447	0.000662934	0.0135798	eIF3d2	0.768517	0.802825
FBgn0038957	362.901	0.579227	0.170237	3.40247	0.000667803	0.0136558	CG7059	0.486561	0.540552
FBgn0039694	141.659	0.720604	0.211914	3.40045	0.000672759	0.0137334	fig	0.738938	0.776534
FBgn0038797	143.506	0.679707	0.200002	3.3985	0.000677564	0.0138076	Dic2	0.68215	0.724669
FBgn0033344	68.1953	0.916629	0.270003	3.39488	0.000686584	0.0139672	CG8252	0.890348	0.907507
FBgn0035005	142.785	0.663508	0.19549	3.39408	0.000688607	0.0139843	CG3483	0.656079	0.700253
FBgn0038946	413.19	-0.443659	0.130736	-3.39355	0.000689923	0.013987	rdhB	0.139885	0.181079
FBgn0039897	818.108	-0.391371	0.115541	-3.3873	0.000705849	0.0142853	CG1674	0.0469157	0.0715351
FBgn0038631	63.5822	-0.884091	0.261281	-3.38368	0.000715224	0.0144502	CG7695	0.873865	0.893254
FBgn0037986	88.7371	0.82093	0.242674	3.38285	0.000717375	0.0144689	CG14736	0.834565	0.859864
FBgn0038000	101.154	0.74286	0.219698	3.38127	0.000721511	0.0145275	Rsbp15	0.763838	0.798431
FBgn0036325	56.1001	0.842102	0.24919	3.37935	0.000726569	0.0146044	CG10752	0.84894	0.872614
FBgn0029753	331.4	0.664218	0.196687	3.37704	0.000732702	0.0147026	CG4198	0.65651	0.700586
FBgn0033542	321.964	0.607153	0.18002	3.3727	0.000744345	0.0149109	CAH13	0.549053	0.600197
FBgn0052072	40.6585	0.904348	0.268229	3.37155	0.000747469	0.0149481	Elo68alpha	0.883118	0.901306
FBgn0038008	172.2	0.67615	0.200683	3.36924	0.000753769	0.0150486	CG3942	0.675224	0.718346
FBgn0024963	3153.16	-0.345385	0.102567	-3.3674	0.000758802	0.0151235	GluClalpha	0.00975047	0.0202924
FBgn0002855	96.7564	0.829921	0.246541	3.36626	0.000761959	0.0151608	Acp26Aa	0.839786	0.864111
FBgn0250835	46.9611	0.921662	0.273887	3.36512	0.000765098	0.0151976	CG15394	0.890527	0.907612
FBgn0035727	72.0484	0.796307	0.236684	3.36443	0.000767023	0.0152103	CG10063	0.814055	0.842707
FBgn0051092	3039.11	0.313189	0.0931788	3.36117	0.000776141	0.0153653	LpR2	0.00176887	0.00467025
FBgn0052437	351.446	0.609599	0.181444	3.35971	0.000780255	0.0154208	CG32437	0.554002	0.604822
FBgn0010247	843.413	-0.377031	0.112251	-3.35882	0.000782758	0.0154444	Parp	0.0319854	0.0529231
FBgn0052568	97.8337	0.773311	0.230333	3.35736	0.000786901	0.0155002	CG32568	0.793242	0.824689
FBgn0020280	71.5931	0.787852	0.234939	3.35343	0.00079816	0.0156958	laf	0.806092	0.836226
FBgn0051459	148.93	0.808128	0.241029	3.35283	0.000799904	0.0157039	CG31459	0.822748	0.849783
FBgn0033056	214.096	0.639176	0.190882	3.34854	0.00081238	0.015896	CG7856	0.611801	0.65962
FBgn0050278	90.8722	0.811202	0.242232	3.34887	0.000811419	0.015896	CG30278	0.824843	0.851632
FBgn0260396	413.58	0.894736	0.267289	3.34745	0.000815591	0.0159324	CG42521	0.876761	0.895593
FBgn0030536	156.025	0.673368	0.201222	3.34639	0.000818703	0.0159667	CG11068	0.669793	0.713084
FBgn0051907	134.631	0.701018	0.209527	3.34571	0.000820709	0.0159795	Mst27D	0.710174	0.750684
FBgn0037970	88.6436	0.796746	0.238499	3.34067	0.000835757	0.0162456	GC2	0.812726	0.841627
FBgn0033322	97.71	0.777058	0.232647	3.34008	0.000837546	0.0162536	CG8584	0.795512	0.826559
FBgn0038475	541.096	-0.432869	0.129858	-3.3334	0.000857915	0.0166216	Keap1	0.120754	0.159732
FBgn0039251	197.303	0.641385	0.192586	3.33038	0.000867285	0.0167756	Trf4-2	0.615229	0.66271
FBgn0029940	137.673	0.729488	0.219099	3.3295	0.000870034	0.0168012	CG1958	0.745256	0.78178
FBgn0038266	121.918	0.787023	0.236725	3.32462	0.000885384	0.0170697	CG3610	0.803326	0.833577
FBgn0044810	117.959	-0.674069	0.202939	-3.32154	0.000895217	0.0172311	TotX	0.669699	0.713048
FBgn0027505	932.884	0.385127	0.116022	3.31943	0.00090202	0.017272	Rab3-GAP	0.0424992	0.0662309
FBgn0032471	461.888	0.607792	0.183065	3.32008	0.000899903	0.017272	CG5122	0.549621	0.600708
FBgn0052835	78.4655	0.827008	0.249169	3.31906	0.000903196	0.017272	lncRNA:CR32835	0.834328	0.859695
FBgn0030968	440.283	-0.485267	0.146203	-3.31914	0.000902958	0.017272	CG7322	0.247651	0.298802
FBgn0053234	52.6359	0.857194	0.258433	3.31689	0.000910243	0.0173786	CG33234	0.85392	0.876436
FBgn0263111	5565.8	-0.360699	0.108792	-3.3155	0.000914807	0.0174375	cac	0.0196323	0.0361457
FBgn0036070	52.7233	0.861052	0.259743	3.31502	0.000916356	0.0174389	CG8072	0.856095	0.878363
FBgn0051206	119.398	0.764871	0.230809	3.31387	0.000920155	0.0174829	CG31206	0.782148	0.814827
FBgn0031476	414.94	0.608165	0.183725	3.3102	0.0009323	0.0176003	CG8813	0.550249	0.601337
FBgn0032664	139.214	0.749622	0.226368	3.31152	0.000927895	0.0176003	Slc25A46b	0.766509	0.800868
FBgn0051161	273.246	0.620145	0.187299	3.31099	0.00092968	0.0176003	CG31161	0.574498	0.624367
FBgn0039920	2090.19	-0.320978	0.0969552	-3.31058	0.000931038	0.0176003	CG11360	0.00323705	0.00791055
FBgn0036162	292.197	0.635776	0.192104	3.30954	0.000934496	0.0176136	Fum3	0.604308	0.652376
FBgn0034532	193.339	0.638878	0.193118	3.30823	0.000938878	0.017668	CG13436	0.609949	0.657803
FBgn0031954	50.9039	0.89277	0.270109	3.30522	0.000949013	0.0178303	CG14537	0.872767	0.892363
FBgn0039246	329.025	0.626459	0.189711	3.30217	0.00095941	0.0179969	CG10845	0.586572	0.635965
FBgn0066101	1821.47	0.350386	0.106302	3.29613	0.000980257	0.0183389	LpR1	0.0136677	0.0269109
FBgn0028360	1435.07	0.356811	0.108256	3.29599	0.000980746	0.0183389	Cdc7	0.0175361	0.032976
FBgn0051391	164.012	0.705039	0.214228	3.29107	0.000998073	0.0185745	CG31391	0.712433	0.752368
FBgn0038565	250.543	0.673681	0.204657	3.29176	0.000995634	0.0185745	CG7794	0.667673	0.711276
FBgn0260942	518.415	0.493008	0.149794	3.29124	0.000997453	0.0185745	bond	0.269648	0.322375
FBgn0028901	581.985	0.528873	0.160764	3.28976	0.00100274	0.0186027	CG18109	0.363584	0.419868
FBgn0000274	150.673	0.724492	0.220214	3.28995	0.00100206	0.0186027	Pka-C2	0.736832	0.774665
FBgn0034156	80.1062	0.834195	0.253651	3.28875	0.00100632	0.0186398	CG5348	0.837093	0.862167
FBgn0040097	30.1979	0.936786	0.285226	3.28437	0.00102211	0.0189027	lectin-30A	0.891304	0.908011
FBgn0036305	1893.86	-0.400398	0.121967	-3.28284	0.00102766	0.0189458	CG10984	0.0651107	0.0943501
FBgn0038213	115.893	0.731167	0.222709	3.28306	0.00102688	0.0189458	CG9624	0.744242	0.781064
FBgn0050197	867.886	-0.445388	0.135787	-3.28004	0.00103792	0.0191051	CG30197	0.152001	0.194352
FBgn0031343	131.357	0.809573	0.246855	3.27955	0.00103972	0.0191085	CG18131	0.81856	0.846479
FBgn0039044	134.055	-0.651004	0.198577	-3.27835	0.00104417	0.0191604	p53	0.630272	0.676319
FBgn0031514	119.688	0.707603	0.215961	3.27653	0.00105091	0.0192381	OtopLb	0.714943	0.754679
FBgn0039299	101.668	-0.722314	0.220465	-3.27633	0.00105166	0.0192381	CG11854	0.733361	0.771702
FBgn0051345	89.2078	-0.736254	0.224796	-3.27521	0.00105585	0.0192848	CG31345	0.749532	0.785636
FBgn0039678	239.386	0.709479	0.216651	3.27476	0.00105752	0.0192855	Obp99a	0.717265	0.75686
FBgn0032061	972.589	0.545596	0.166654	3.27382	0.00106104	0.0193198	CG9314	0.406631	0.462916
FBgn0034827	317.811	0.562193	0.17179	3.27257	0.00106575	0.0193757	Klp59D	0.447278	0.502638
FBgn0036075	148.542	0.651603	0.199286	3.2697	0.00107663	0.0195434	CG8065	0.63096	0.676997
FBgn0051712	1331	-0.329106	0.100748	-3.26661	0.00108842	0.019727	CG31712	0.00554953	0.0125989
FBgn0040007	945.567	0.44527	0.136428	3.26376	0.00109943	0.0198048	RpL38	0.152936	0.195441
FBgn0082987	207.969	-0.588642	0.18031	-3.26461	0.00109613	0.0198048	snoRNA:Psi28S-2444	0.50814	0.561406
FBgn0267668	313.732	-0.57788	0.177018	-3.26453	0.00109646	0.0198048	lncRNA:CR46006	0.484042	0.538413
FBgn0011723	71.1962	0.779901	0.238946	3.26392	0.00109884	0.0198048	byn	0.7927	0.82429
FBgn0037826	126.779	0.682039	0.209031	3.26286	0.00110294	0.0198378	CG14689	0.678824	0.721655
FBgn0000014	171.473	0.651157	0.199631	3.2618	0.00110708	0.0198517	abd-A	0.629898	0.675979
FBgn0038658	1007.52	0.494135	0.151475	3.26215	0.00110572	0.0198517	CG14292	0.274379	0.327235
FBgn0043364	2154.53	0.307176	0.0941885	3.26129	0.00110905	0.0198569	cbt	0.00159269	0.00427886
FBgn0051910	139.916	0.737441	0.226192	3.26025	0.00111315	0.0199	CG31910	0.74988	0.785931
FBgn0030376	698	0.530409	0.162721	3.25963	0.0011156	0.0199136	CG2750	0.368716	0.425128
FBgn0017556	66.8066	0.808975	0.248262	3.25856	0.0011198	0.0199586	Prosalpha4T2	0.816558	0.844853
FBgn0037466	712.873	-0.377119	0.115809	-3.25639	0.00112841	0.0200513	CG1965	0.0363496	0.0584548
FBgn0038739	515.846	0.559201	0.171723	3.25642	0.00112827	0.0200513	CG4686	0.440376	0.496396
FBgn0002719	6514.47	-0.287817	0.0884055	-3.25565	0.00113135	0.0200734	Men	0.000388076	0.0012581
FBgn0032369	95.5403	0.777935	0.238988	3.25513	0.00113342	0.0200798	CG6614	0.790299	0.822196
FBgn0032563	64.3716	0.884939	0.272024	3.25317	0.00114125	0.020128	CG15258	0.864934	0.885861
FBgn0034566	291.321	0.596759	0.18341	3.25369	0.00113919	0.020128	CG9313	0.525642	0.578089
FBgn0039855	92.1735	0.781486	0.240195	3.25354	0.00113975	0.020128	CG1638	0.793373	0.8247
FBgn0026379	723.118	-0.383168	0.117905	-3.2498	0.00115485	0.0203374	Pten	0.0434942	0.067372
FBgn0040508	285.274	0.609571	0.187686	3.24783	0.00116289	0.0204484	ACXC	0.552158	0.603032
FBgn0027611	3045.93	-0.309266	0.0952429	-3.24713	0.00116575	0.0204683	LManII	0.00189782	0.00496228
FBgn0031724	270.951	0.623229	0.191969	3.24651	0.00116829	0.0204761	CG18266	0.579	0.628622
FBgn0013809	332.106	0.605079	0.186397	3.24618	0.00116967	0.0204761	Dhc16F	0.542971	0.594485
FBgn0025469	107.702	0.684209	0.210873	3.24466	0.00117592	0.0204944	slv	0.681054	0.723765
FBgn0052351	2422.85	0.740615	0.228247	3.2448	0.00117534	0.0204944	S-Lap2	0.752364	0.787994
FBgn0261860	24.3798	0.928092	0.286032	3.24472	0.00117567	0.0204944	CG42789	0.884857	0.902768
FBgn0053136	109.919	0.715189	0.220568	3.24249	0.00118491	0.0205753	CG33136	0.722543	0.761951
FBgn0035665	977.214	0.543409	0.167601	3.24227	0.0011858	0.0205753	Jon65Aiii	0.402095	0.458504
FBgn0004654	930.023	-0.347589	0.107191	-3.24269	0.00118406	0.0205753	Pgd	0.0133977	0.0264723
FBgn0051216	79.2973	-0.821642	0.25359	-3.24005	0.0011951	0.0207063	Naam	0.824672	0.85153
FBgn0028379	196.8	0.724679	0.224104	3.23368	0.00122207	0.0211052	fan	0.733504	0.771717
FBgn0053293	341.105	0.565355	0.174836	3.23363	0.00122226	0.0211052	CG33293	0.455352	0.510836
FBgn0028396	172.693	-0.593605	0.183589	-3.23335	0.00122349	0.0211052	TotA	0.518774	0.571335
FBgn0023415	116.255	0.804616	0.248887	3.23286	0.00122557	0.0211102	Acp32CD	0.811259	0.840467
FBgn0037939	1003.59	0.776886	0.240418	3.2314	0.00123184	0.0211873	CG14718	0.78765	0.819834
FBgn0042179	154.157	0.682771	0.211512	3.22805	0.00124637	0.0214061	Ugt305A1	0.678111	0.721093
FBgn0034505	224.841	0.640441	0.198526	3.22598	0.00125541	0.0215299	CG16739	0.610052	0.657854
FBgn0038486	201.132	0.655335	0.203205	3.225	0.00125974	0.0215541	CG5265	0.635446	0.680943
FBgn0051013	42.6322	0.861404	0.26715	3.22442	0.0012623	0.0215541	CG31013	0.849614	0.872928
FBgn0030932	433.88	0.448897	0.139201	3.22482	0.0012605	0.0215541	Ggt-1	0.164167	0.20779
FBgn0061196	60.687	0.811437	0.251707	3.22373	0.00126533	0.0215746	CG15468	0.815874	0.844516
FBgn0036159	179.133	0.717206	0.222509	3.22327	0.00126735	0.021578	CG7557	0.723855	0.762858
FBgn0040232	147.171	0.686077	0.212915	3.22231	0.00127161	0.0216167	cmet	0.682573	0.724988
FBgn0053287	467.459	0.52046	0.161537	3.22193	0.0012733	0.0216167	CG33287	0.344833	0.400568
FBgn0038613	29.6456	0.900541	0.279564	3.22123	0.00127642	0.0216386	Vha100-4	0.870514	0.890523
FBgn0011274	2126.41	-0.291743	0.090621	-3.21937	0.00128471	0.021748	Dif	0.000606787	0.00186414
FBgn0038377	318.802	0.596816	0.185512	3.21713	0.00129482	0.0218876	CG9632	0.525473	0.577957
FBgn0031292	277.068	0.558246	0.173611	3.2155	0.00130215	0.0219801	CG15824	0.438849	0.494911
FBgn0058263	1072.21	-0.411527	0.128017	-3.21463	0.00130614	0.0219846	MFS17	0.0877426	0.121303
FBgn0036091	4646.84	0.754132	0.23457	3.21495	0.00130467	0.0219846	CG18628	0.764603	0.799161
FBgn0052806	71.8623	0.821785	0.255762	3.21308	0.00131318	0.0220716	CG32806	0.822764	0.849783
FBgn0263647	167.096	0.683516	0.213032	3.20851	0.00133424	0.0223936	CG43638	0.678182	0.721103
FBgn0034471	28.5914	-0.905382	0.282432	-3.20567	0.0013475	0.0225595	Obp56e	0.871708	0.891435
FBgn0051406	60.8301	0.833057	0.259911	3.20516	0.00134986	0.0225595	CG31406	0.830094	0.856019
FBgn0051231	271.919	0.621856	0.193995	3.20553	0.00134813	0.0225595	CG31231	0.575416	0.625249
FBgn0031626	316.097	0.612685	0.191256	3.20349	0.00135774	0.0226316	CG15631	0.557625	0.60844
FBgn0029752	465.034	0.604423	0.18868	3.20343	0.00135801	0.0226316	TrxT	0.541075	0.59274
FBgn0033446	2707.85	0.375722	0.117418	3.19987	0.00137489	0.0228233	CG1648	0.0373733	0.0597992
FBgn0040747	71.8406	0.808613	0.252709	3.19978	0.00137532	0.0228233	CG12853	0.811925	0.840945
FBgn0259795	5471.42	0.739084	0.230963	3.2	0.00137426	0.0228233	loopin-1	0.747709	0.784005
FBgn0036830	164.942	0.650056	0.203348	3.19677	0.00138976	0.0230306	COX6AL2	0.625557	0.671993
FBgn0037398	109.407	0.791877	0.247855	3.19491	0.00139873	0.0231467	CG15580	0.79809	0.828726
FBgn0036941	93.5163	0.749848	0.234812	3.19339	0.0014061	0.0232037	CG7335	0.758724	0.79386
FBgn0001281	207.255	0.580755	0.181846	3.19366	0.00140481	0.0232037	janB	0.49077	0.544664
FBgn0036160	117.104	0.732603	0.229612	3.19061	0.00141971	0.0233955	CG12289	0.739888	0.777255
FBgn0265265	44.0183	0.871418	0.273243	3.18917	0.00142681	0.0234797	CG32727	0.852762	0.87534
FBgn0031323	97.9885	0.809479	0.253945	3.18762	0.0014345	0.0235406	CG5139	0.811683	0.840768
FBgn0032867	99.0122	0.681012	0.213618	3.188	0.00143262	0.0235406	CG15475	0.673513	0.716785
FBgn0036156	42.1164	0.835355	0.262224	3.18565	0.00144428	0.0236681	CG11726	0.830181	0.856019
FBgn0034263	154.251	0.732605	0.230008	3.18513	0.00144691	0.0236784	CG10934	0.739531	0.777088
FBgn0025821	68.9735	0.766229	0.240747	3.18272	0.00145899	0.0238429	I-t	0.774255	0.80796
FBgn0031939	124.315	-0.630185	0.198176	-3.17992	0.00147315	0.0239784	CG13796	0.590251	0.639425
FBgn0035734	311.937	-0.508048	0.15977	-3.17988	0.00147337	0.0239784	CG14823	0.315114	0.369943
FBgn0262099	70.0673	0.83429	0.262334	3.18026	0.00147145	0.0239784	CG42852	0.82905	0.855228
FBgn0033020	203.71	0.62485	0.196555	3.17901	0.00147781	0.0239844	COX4L	0.580407	0.629744
FBgn0038630	305.767	0.650159	0.204495	3.17934	0.0014761	0.0239844	CG14305	0.625068	0.671591
FBgn0259821	1347.95	-0.334251	0.105167	-3.17829	0.00148148	0.0240109	CG42402	0.00856411	0.0181795
FBgn0085426	494.749	-0.413627	0.130252	-3.17559	0.00149534	0.0241747	Rgk3	0.0941851	0.128731
FBgn0050284	67.9785	0.788628	0.248346	3.17552	0.00149568	0.0241747	CG30284	0.793917	0.825192
FBgn0033680	78.6781	0.767529	0.24177	3.17463	0.00150029	0.024216	CG13186	0.774913	0.808572
FBgn0035855	108.288	0.645639	0.203438	3.17363	0.00150544	0.0242659	CG7366	0.617246	0.664215
FBgn0028516	82.8255	0.792932	0.249943	3.17246	0.00151155	0.0243312	ZnT35C	0.797315	0.828067
FBgn0025790	713.735	-0.38676	0.121939	-3.17176	0.00151519	0.0243566	TBPH	0.0520355	0.0781941
FBgn0261998	117.097	0.773595	0.244282	3.16681	0.00154123	0.0247415	CG42816	0.779999	0.812947
FBgn0004507	9551.18	-0.308508	0.0974319	-3.16639	0.00154342	0.024743	GlyP	0.00227403	0.00582408
FBgn0260428	183.361	0.606641	0.191668	3.16507	0.00155047	0.0248041	CG42523	0.545027	0.596405
FBgn0053309	59.7724	0.868464	0.274406	3.16489	0.00155144	0.0248041	CG33309	0.849232	0.872765
FBgn0004028	1252.58	0.390125	0.123287	3.16435	0.0015543	0.0248162	wupA	0.0570129	0.0843966
FBgn0040963	185.766	0.694377	0.219587	3.16219	0.00156585	0.0249331	CG18662	0.690855	0.732861
FBgn0051244	118.238	0.739577	0.23388	3.16221	0.00156579	0.0249331	CG31244	0.745721	0.782198
FBgn0032494	1608.92	-0.380163	0.120334	-3.15922	0.00158193	0.0251213	CG5945	0.0443847	0.0684279
FBgn0029084	63.855	0.763184	0.241545	3.15959	0.00157989	0.0251213	gom	0.769694	0.803698
FBgn0037506	255.378	0.547524	0.173532	3.15517	0.00160405	0.0254385	Mics1	0.414594	0.47089
FBgn0038539	102.056	0.739046	0.234288	3.15444	0.00160807	0.0254679	Atg8b	0.744625	0.781326
FBgn0052574	59.1978	0.824936	0.261637	3.15298	0.00161615	0.0255616	Twdlalpha	0.820481	0.847937
FBgn0054040	22.043	-0.897406	0.284822	-3.15076	0.00162846	0.0256873	CG34040	0.863674	0.884754
FBgn0066084	2293.83	0.442801	0.140525	3.15106	0.00162679	0.0256873	RpL41	0.155854	0.198611
FBgn0033247	327.137	-0.48439	0.153768	-3.15013	0.00163199	0.0257087	Nup44A	0.256538	0.30841
FBgn0039752	238.207	0.657922	0.209217	3.14468	0.00166267	0.0261572	CG15530	0.636353	0.68179
FBgn0037320	39.6997	0.875574	0.278685	3.14181	0.00167907	0.0263099	CG14668	0.851479	0.874312
FBgn0051467	65.6668	0.770168	0.24512	3.14201	0.00167794	0.0263099	CG31467	0.775047	0.808572
FBgn0030014	57.2482	0.836152	0.266134	3.14185	0.00167884	0.0263099	CG15337	0.827376	0.853874
FBgn0013810	584.259	0.547768	0.174514	3.13882	0.00169629	0.0265093	Dhc36C	0.415612	0.471813
FBgn0064912	240.332	0.70932	0.225958	3.13917	0.0016943	0.0265093	CG31178	0.708963	0.749709
FBgn0032122	72.1377	0.756207	0.241131	3.13608	0.00171221	0.0267227	CG31883	0.761201	0.796098
FBgn0030814	153.085	0.7035	0.224454	3.13428	0.00172277	0.0268519	CG4955	0.701291	0.742595
FBgn0031432	126.921	-0.641462	0.204766	-3.13266	0.00173231	0.0269651	Cyp309a1	0.608696	0.656692
FBgn0050192	69.7819	0.801617	0.255941	3.13204	0.00173598	0.0269866	CG30192	0.801363	0.831759
FBgn0052450	141.575	0.634309	0.202604	3.13078	0.00174345	0.0270671	CG32450	0.596215	0.64476
FBgn0035526	673.746	-0.380008	0.121557	-3.12618	0.00177096	0.027458	CG1316	0.04589	0.07028
FBgn0025837	69.1817	0.814961	0.260763	3.12529	0.00177628	0.0275044	CG17636	0.811117	0.840404
FBgn0035915	5083.67	0.694831	0.222436	3.12374	0.0017857	0.0276141	S-Lap1	0.689323	0.731367
FBgn0033431	196.728	0.548285	0.175623	3.12195	0.00179658	0.0277459	CG1827	0.417286	0.473264
FBgn0033188	3323.96	0.278576	0.0892876	3.11999	0.00180858	0.0278946	Drat	0.000300178	0.00100749
FBgn0039177	98.7541	0.746838	0.239743	3.11516	0.00183842	0.028318	shps	0.750227	0.786085
FBgn0032647	107.569	0.691428	0.222088	3.1133	0.00185008	0.0284233	CG15143	0.684167	0.726354
FBgn0085434	8456.26	-0.322697	0.103644	-3.1135	0.00184882	0.0284233	NaCP60E	0.00569609	0.0128869
FBgn0262574	103.785	0.674481	0.216787	3.11126	0.00186288	0.0285827	CG43114	0.660172	0.703858
FBgn0037254	98.9608	0.713321	0.229374	3.10986	0.00187176	0.0286817	CG14651	0.712125	0.752178
FBgn0038127	117.968	0.704564	0.226726	3.10756	0.00188641	0.0288687	CG8476	0.701082	0.742441
FBgn0034417	364.88	0.449754	0.14484	3.10518	0.00190161	0.0290636	CG15117	0.17528	0.21964
FBgn0036222	103.471	0.726834	0.234265	3.10261	0.00191823	0.0292797	SdhAL	0.72761	0.766405
FBgn0030242	239.359	0.532742	0.171802	3.1009	0.00192934	0.0294112	sofe	0.38058	0.437056
FBgn0052203	34.171	0.839889	0.271026	3.09892	0.00194225	0.0295699	Spn75F	0.826544	0.853091
FBgn0050369	37.7195	0.866169	0.27989	3.09468	0.00197027	0.0299578	CG30369	0.84248	0.866807
FBgn0027287	1952.52	0.360989	0.116684	3.09374	0.00197649	0.0300136	Gmap	0.0274612	0.0468776
FBgn0264347	302.587	0.622096	0.20121	3.09178	0.00198963	0.0301134	lncRNA:CR43803	0.57321	0.623082
FBgn0039298	1064.67	-0.372162	0.120351	-3.09231	0.00198603	0.0301134	to	0.038516	0.0612125
FBgn0029932	1085.91	-0.329867	0.106697	-3.09161	0.00199071	0.0301134	CG4607	0.0084052	0.0178937
FBgn0032424	282.124	0.526372	0.170386	3.0893	0.00200631	0.0303105	CG17010	0.365473	0.421801
FBgn0026136	49.157	0.851357	0.275772	3.08718	0.00202064	0.030449	CkIIbeta2	0.832977	0.858528
FBgn0034833	55.8434	0.807798	0.261632	3.08754	0.00201822	0.030449	CG13539	0.802813	0.833118
FBgn0016080	407.724	0.498025	0.161428	3.08512	0.00203467	0.0306212	xmas	0.295097	0.34912
FBgn0265089	245.592	0.619904	0.201012	3.08392	0.00204294	0.0307065	eIF4E3	0.568999	0.619247
FBgn0029939	1710.52	-0.389549	0.12636	-3.08285	0.00205027	0.0307776	CG9650	0.0609942	0.08933
FBgn0033279	130.671	0.770495	0.250012	3.08183	0.00205731	0.0308439	CG2291	0.770985	0.804903
FBgn0051882	65.8512	0.836097	0.271729	3.07695	0.00209128	0.0310352	CG31882	0.822311	0.849481
FBgn0032364	129.144	0.686027	0.222935	3.07726	0.00208916	0.0310352	CG4970	0.674846	0.71801
FBgn0032370	103.485	0.731971	0.237934	3.07637	0.0020954	0.0310352	CG12307	0.731665	0.770126
FBgn0028902	290.031	0.583714	0.189586	3.07889	0.00207771	0.0310352	Tektin-A	0.497374	0.550904
FBgn0033323	147.637	0.657651	0.213603	3.07885	0.00207804	0.0310352	CG12376	0.633184	0.679011
FBgn0264501	82.8917	-0.725277	0.235621	-3.07814	0.00208294	0.0310352	lncRNA:CR43900	0.724248	0.763204
FBgn0035782	99.2783	0.742914	0.241289	3.07894	0.00207737	0.0310352	CG14835	0.743643	0.780573
FBgn0029091	226.202	0.625814	0.203328	3.07785	0.00208501	0.0310352	Chs2	0.579617	0.629061
FBgn0029722	188.385	0.597728	0.194305	3.07623	0.00209637	0.0310352	CG7024	0.526191	0.578638
FBgn0030620	40.0639	0.854237	0.277671	3.07644	0.00209487	0.0310352	CG5662	0.833918	0.859347
FBgn0016122	1571.4	0.295698	0.0962008	3.07376	0.00211381	0.0312541	Acer	0.0013197	0.00364083
FBgn0032167	959.18	-0.347628	0.113128	-3.07287	0.00212011	0.031308	CG5853	0.0179561	0.0336523
FBgn0051697	42.9653	0.828025	0.269642	3.07083	0.00213467	0.0314838	CG31697	0.816319	0.844754
FBgn0011555	89.4107	0.749738	0.244254	3.0695	0.00214419	0.0315847	thetaTry	0.750037	0.786026
FBgn0038714	22.6351	0.874414	0.285015	3.06796	0.00215526	0.031708	Cpr92A	0.845082	0.869181
FBgn0031148	400.521	-0.398058	0.129788	-3.06699	0.00216227	0.0317716	Cbs	0.074923	0.106143
FBgn0034461	34.664	0.861378	0.281064	3.06471	0.00217883	0.0319058	CG15124	0.83731	0.862315
FBgn0013973	1529.63	-0.353297	0.115297	-3.06424	0.00218221	0.0319058	Gycbeta100B	0.0222526	0.0398312
FBgn0029890	59.8031	0.780029	0.254477	3.06522	0.00217511	0.0319058	Fum2	0.778322	0.811414
FBgn0053517	4921.35	-0.327989	0.107026	-3.06458	0.00217975	0.0319058	Dop2R	0.00817419	0.0174744
FBgn0039077	83.8059	0.7183	0.234576	3.06212	0.00219775	0.0320931	CG17380	0.715125	0.754737
FBgn0022361	1409.71	-0.347386	0.113631	-3.05714	0.00223462	0.0325911	Pur-alpha	0.0182742	0.0341023
FBgn0086357	1196.44	0.30795	0.100785	3.0555	0.00224684	0.032729	Sec61alpha	0.00299303	0.00739419
FBgn0025388	427.279	0.449619	0.147223	3.054	0.00225816	0.0328533	Alms1a	0.178967	0.22388
FBgn0037995	211.164	0.614644	0.201337	3.05281	0.00226713	0.0329027	Adk1	0.5586	0.609334
FBgn0030993	99.4283	0.647439	0.212063	3.05306	0.00226523	0.0329027	Mec2	0.615855	0.663198
FBgn0266654	178.766	-0.550449	0.180569	-3.04841	0.00230057	0.0333469	asRNA:CR45161	0.42421	0.480239
FBgn0050011	20693.9	-0.253497	0.0831796	-3.04759	0.00230688	0.0333565	gem	3.37483e-05	0.000155784
FBgn0264908	1729.85	-0.341214	0.111949	-3.04793	0.00230424	0.0333565	pHCl-1	0.0147286	0.0286317
FBgn0010241	164.26	0.58674	0.192578	3.04677	0.00231314	0.033406	Mdr50	0.503682	0.557054
FBgn0032968	43.297	0.822866	0.270337	3.04386	0.00233566	0.0336752	CG11634	0.810578	0.840066
FBgn0085387	4193.48	-0.297393	0.0977101	-3.04362	0.00233748	0.0336752	shakB	0.00162475	0.00435211
FBgn0035856	35.0893	0.855546	0.281173	3.04278	0.00234407	0.0336878	CG13679	0.83206	0.857695
FBgn0030479	1898.84	-0.328741	0.10803	-3.04306	0.00234188	0.0336878	Rbp1-like	0.00885161	0.0186806
FBgn0027582	1434.92	0.417855	0.137369	3.04184	0.00235138	0.0337517	CG6230	0.1119	0.149377
FBgn0042696	2451.79	-0.310527	0.10213	-3.04051	0.00236177	0.0338597	NfI	0.00360357	0.00869487
FBgn0032650	93.5902	0.66309	0.218192	3.03901	0.00237355	0.0339173	CG7094	0.639853	0.685353
FBgn0037900	331.128	0.511712	0.168387	3.0389	0.00237441	0.0339173	CG5276	0.331777	0.387117
FBgn0039900	1402.18	-0.30547	0.100496	-3.03962	0.00236881	0.0339173	Syt7	0.00270855	0.00676792
FBgn0038762	9931.26	0.675464	0.222418	3.03691	0.0023902	0.0341016	CG4836	0.657958	0.701751
FBgn0030429	129.137	0.594851	0.196079	3.03373	0.00241551	0.034421	CG4661	0.52011	0.572592
FBgn0082986	381.441	-0.451381	0.148857	-3.0323	0.00242696	0.0345425	snoRNA:Psi28S-2562	0.184758	0.230172
FBgn0085454	151.64	0.660129	0.217748	3.03162	0.00243249	0.0345794	CG34425	0.635028	0.68068
FBgn0050104	308.717	0.54262	0.179064	3.03031	0.00244299	0.034687	NT5E-2	0.406537	0.462853
FBgn0051347	53.5686	0.792107	0.261463	3.02952	0.0024494	0.0347098	CG31347	0.785894	0.8183
FBgn0038397	47.8183	-0.866726	0.286106	-3.02939	0.00245048	0.0347098	CG10185	0.837644	0.862584
FBgn0028856	89.0818	0.694826	0.229404	3.02884	0.00245499	0.0347319	CG18063	0.683998	0.72624
FBgn0030653	73.1375	0.754507	0.249164	3.02815	0.00246056	0.034769	CG7860	0.751891	0.787619
FBgn0032010	3531.11	-0.407338	0.134699	-3.02406	0.00249407	0.0352004	CG8086	0.0936392	0.128193
FBgn0031861	74.0859	0.724995	0.23978	3.02359	0.00249798	0.0352135	CG17375	0.720391	0.759819
FBgn0036926	335.538	-0.431863	0.142854	-3.02311	0.00250189	0.0352265	CG7646	0.141923	0.183394
FBgn0031653	86.0575	0.738781	0.24451	3.02148	0.00251542	0.0352488	Jon25Biii	0.735355	0.773391
FBgn0032492	65.9911	0.811955	0.268654	3.0223	0.00250858	0.0352488	Prosalpha6T	0.800924	0.831449
FBgn0050046	147.905	-0.617657	0.204402	-3.02178	0.00251293	0.0352488	CG30046	0.563541	0.614102
FBgn0266436	53.5063	0.833235	0.27576	3.0216	0.00251446	0.0352488	CG45066	0.816025	0.844599
FBgn0267366	327.486	0.61824	0.204642	3.02107	0.00251879	0.0352541	mil	0.564589	0.615071
FBgn0051874	176.819	0.669469	0.221775	3.01869	0.00253872	0.0353236	Fum4	0.648416	0.693455
FBgn0032478	67.3873	0.727489	0.240944	3.01933	0.00253332	0.0353236	Rsph1	0.722919	0.762076
FBgn0033141	73.618	0.763317	0.252748	3.02007	0.00252712	0.0353236	CG12831	0.7598	0.794775
FBgn0036680	202.829	-0.52349	0.173403	-3.01892	0.0025368	0.0353236	Cpr73D	0.361479	0.417764
FBgn0262952	6392.89	0.395675	0.131046	3.01936	0.00253311	0.0353236	mt:ND4	0.0743087	0.10544
FBgn0036321	206.377	0.855625	0.283499	3.01809	0.00254377	0.0353429	CG14120	0.83014	0.856019
FBgn0039881	109.024	0.679427	0.225139	3.01781	0.0025461	0.0353429	CG1971	0.662605	0.706196
FBgn0032039	65.6571	0.734103	0.243297	3.01731	0.00255029	0.0353594	CG13385	0.730061	0.768574
FBgn0029817	99.8776	0.698265	0.231567	3.01539	0.0025665	0.0355424	CG15764	0.68768	0.729821
FBgn0031345	22.5153	0.857735	0.284531	3.01456	0.00257356	0.0355596	CG18132	0.831139	0.856857
FBgn0050432	29.7339	0.838699	0.278284	3.01382	0.0025798	0.0355596	CG30432	0.81906	0.846877
FBgn0027654	3652.93	-0.296838	0.0984847	-3.01405	0.00257783	0.0355596	jdp	0.00171909	0.00456082
FBgn0040362	39.0994	0.811993	0.269364	3.01449	0.00257416	0.0355596	CG11379	0.800341	0.830925
FBgn0051624	58.5157	0.747423	0.248496	3.00778	0.00263161	0.0361892	CG31624	0.743371	0.780497
FBgn0000447	299.14	0.453236	0.150682	3.0079	0.00263063	0.0361892	Dhod	0.191004	0.237251
FBgn0032483	137.757	0.617498	0.20547	3.00529	0.00265325	0.0363597	CG15482	0.562908	0.613524
FBgn0053189	207.678	0.500298	0.166454	3.00563	0.00265031	0.0363597	CG33189	0.305503	0.360166
FBgn0053218	47.5923	0.800419	0.266283	3.00589	0.00264801	0.0363597	lncRNA:CR33218	0.790778	0.822437
FBgn0038450	97.1098	0.69082	0.229903	3.00484	0.00265723	0.0363721	CG17560	0.677402	0.720404
FBgn0001145	11064.4	-0.250681	0.0834733	-3.00313	0.00267217	0.0365341	Gs2	3.10549e-05	0.000145284
FBgn0028868	121.211	0.696212	0.231976	3.00123	0.0026889	0.0367141	CG4701	0.684236	0.726361
FBgn0029639	40.1428	-0.8038	0.26785	-3.00093	0.00269156	0.0367141	CG14419	0.79304	0.824571
FBgn0031632	1981.56	-0.439658	0.146681	-2.99738	0.00272315	0.0371021	CG15628	0.160938	0.204294
FBgn0250834	102.784	0.738679	0.246656	2.99478	0.00274646	0.0373757	CG33308	0.733424	0.771702
FBgn0065100	826.241	-0.427555	0.1428	-2.99408	0.00275274	0.0373757	snmRNA:254	0.135168	0.175856
FBgn0038978	114.015	0.660836	0.220703	2.99423	0.00275141	0.0373757	tHMG1	0.634494	0.680238
FBgn0030622	54.6703	0.774503	0.258731	2.99347	0.00275829	0.0374081	CG9101	0.768092	0.802451
FBgn0045770	2606.56	0.710429	0.23741	2.99241	0.00276786	0.0374947	S-Lap3	0.701416	0.742661
FBgn0033687	52.6688	0.765167	0.255745	2.99192	0.00277232	0.0375122	CG8407	0.759479	0.794509
FBgn0033292	32.5055	0.855617	0.286019	2.99146	0.00277644	0.0375248	Cyp4ad1	0.827997	0.85444
FBgn0265187	189.052	0.565191	0.189006	2.99034	0.00278669	0.0376202	Fatp2	0.458342	0.513605
FBgn0045842	842.222	0.38231	0.127958	2.98778	0.0028101	0.037893	yuri	0.0566266	0.0839238
FBgn0031235	131.086	0.646568	0.216615	2.98488	0.00283694	0.0381113	CG13693	0.611948	0.659718
FBgn0083938	123.096	0.693519	0.232368	2.98457	0.00283975	0.0381113	BG642163	0.679813	0.722642
FBgn0037115	125.669	0.667634	0.223656	2.9851	0.00283487	0.0381113	CG11249	0.644174	0.689481
FBgn0037166	414.999	0.405976	0.136038	2.98428	0.00284244	0.0381113	CG11426	0.0941363	0.128683
FBgn0037191	73.0446	0.731953	0.245267	2.98431	0.0028422	0.0381113	CG14448	0.725516	0.764404
FBgn0082974	301.291	-0.547711	0.183695	-2.98163	0.00286716	0.0383556	snoRNA:Psi28S-3305c	0.41965	0.47567
FBgn0052720	30.3952	0.838214	0.281117	2.98173	0.00286626	0.0383556	CG32720	0.816173	0.844678
FBgn0031831	66.8366	0.726476	0.243842	2.97929	0.00288919	0.0385628	COX5BL	0.71916	0.758724
FBgn0051294	89.9765	0.666804	0.223789	2.97961	0.00288615	0.0385628	CG31294	0.642709	0.688106
FBgn0020545	528.178	0.437821	0.14706	2.97715	0.00290942	0.0386569	kraken	0.158521	0.201552
FBgn0086672	416.924	-0.500829	0.168243	-2.97681	0.00291261	0.0386569	snoRNA:Or-aca5	0.308512	0.363205
FBgn0015001	29.9649	0.845272	0.283923	2.97711	0.00290975	0.0386569	iotaTry	0.820385	0.84792
FBgn0263249	37.4972	0.823235	0.276503	2.97731	0.00290793	0.0386569	CG43392	0.805583	0.835772
FBgn0039908	4081.53	-0.274946	0.0923362	-2.97766	0.0029046	0.0386569	Asator	0.000393286	0.00127327
FBgn0082922	1195.76	-0.408751	0.137354	-2.97589	0.00292139	0.0386863	snoRNA:Or-aca4	0.0997642	0.13529
FBgn0013676	26889.1	0.337961	0.113555	2.97619	0.00291851	0.0386863	mt:CoIII	0.0148087	0.0287407
FBgn0035263	45.1811	0.825964	0.277612	2.97524	0.00292758	0.0387249	CG12035	0.807336	0.837443
FBgn0033234	27.5518	0.835948	0.281244	2.97232	0.00295555	0.039051	MFS12	0.813914	0.842635
FBgn0035941	34.5506	0.827913	0.278615	2.97153	0.00296317	0.0391078	CG13313	0.808394	0.838245
FBgn0039577	80.667	0.695454	0.234095	2.97082	0.0029701	0.0391556	CG12516	0.681534	0.724145
FBgn0262100	100.139	0.693077	0.233357	2.97002	0.00297776	0.0392128	CG42853	0.678425	0.721297
FBgn0036826	38.9878	-0.800773	0.269719	-2.96892	0.00298851	0.0393104	arx	0.788183	0.820189
FBgn0036641	77.6247	0.680411	0.229287	2.96751	0.00300226	0.0394473	Smn	0.661399	0.705038
FBgn0036927	1055.72	-0.328409	0.1107	-2.96666	0.00301054	0.039512	Gabat	0.0102366	0.0211308
FBgn0036029	231.24	0.572228	0.192921	2.96613	0.00301571	0.039536	CG16719	0.473685	0.528188
FBgn0053319	67.3964	0.722015	0.243833	2.96111	0.00306534	0.0399032	CR33319	0.712968	0.752772
FBgn0034477	116.274	0.635644	0.214633	2.96154	0.00306109	0.0399032	CG13872	0.593334	0.642289
FBgn0035852	182.673	0.555356	0.187563	2.9609	0.00306739	0.0399032	CG7387	0.437289	0.493436
FBgn0003388	97.3388	0.690603	0.23308	2.96294	0.00304719	0.0399032	shd	0.67481	0.71801
FBgn0036751	83.176	0.681643	0.23016	2.9616	0.00306046	0.0399032	Adgf-B	0.662778	0.706317
FBgn0038225	359.187	0.563838	0.190384	2.96158	0.00306065	0.0399032	soti	0.455825	0.511318
FBgn0039598	41.1814	0.793191	0.267847	2.96136	0.00306283	0.0399032	aqrs	0.781544	0.814341
FBgn0011280	1924.53	-0.360793	0.121887	-2.96007	0.00307574	0.0399677	Obp19d	0.0329455	0.0542302
FBgn0033203	32.6328	0.830712	0.2808	2.95838	0.00309265	0.0401432	CG2070	0.809261	0.838996
FBgn0036031	319.331	0.536476	0.181382	2.95772	0.00309921	0.0401514	CG6761	0.394613	0.451194
FBgn0000565	212.541	-0.485647	0.164201	-2.95764	0.00310008	0.0401514	MsrA	0.272643	0.325461
FBgn0259216	497.433	-0.411512	0.13917	-2.95691	0.00310743	0.0402023	RhoGAP102A	0.106323	0.143
FBgn0030356	158.664	0.68829	0.232802	2.95654	0.00311108	0.0402055	lncRNA:CR32661	0.671421	0.714688
FBgn0032897	1156.98	0.307953	0.104216	2.95494	0.00312735	0.0403601	CG9336	0.00393007	0.00936389
FBgn0033524	86.3499	0.678988	0.229853	2.95401	0.00313672	0.0403601	Cyp49a1	0.658755	0.70241
FBgn0033794	221.427	0.638014	0.215973	2.95414	0.00313545	0.0403601	CG13326	0.59702	0.645453
FBgn0263413	1939.99	-0.427189	0.144606	-2.95415	0.0031353	0.0403601	lncRNA:CR43459	0.137625	0.178466
FBgn0025387	95.4422	0.740178	0.250613	2.95347	0.00314219	0.0403864	Alms1b	0.732155	0.770504
FBgn0032768	154.668	0.632969	0.214342	2.95307	0.00314628	0.0403949	CG17564	0.58861	0.63794
FBgn0051952	196.016	0.62132	0.210471	2.95205	0.00315674	0.0404852	CG31952	0.568573	0.618955
FBgn0035218	229.148	0.594897	0.201557	2.9515	0.00316232	0.0405127	CG9173	0.519656	0.572199
FBgn0032003	73.2527	0.778906	0.263943	2.95104	0.00316701	0.0405175	CG8349	0.768768	0.802945
FBgn0263472	121.403	-0.599776	0.203259	-2.9508	0.00316956	0.0405175	snoRNA:2R:9445205	0.529049	0.581023
FBgn0031734	1898.26	-0.312706	0.10601	-2.94977	0.00318013	0.0406086	CG11147	0.0051112	0.0117234
FBgn0004242	16226.5	-0.292788	0.09931	-2.94823	0.00319602	0.0406963	Syt1	0.00163028	0.00436494
FBgn0033969	240.932	0.58211	0.197453	2.9481	0.00319734	0.0406963	Pgm2b	0.494237	0.54779
FBgn0029952	127.595	0.621448	0.210765	2.94854	0.00319283	0.0406963	CG12689	0.568717	0.618997
FBgn0036328	138.831	0.635591	0.215672	2.94702	0.00320848	0.040794	CG10749	0.592797	0.64183
FBgn0001226	89.2103	0.648237	0.220172	2.94423	0.00323757	0.0410753	Hsp27	0.613091	0.660769
FBgn0039347	418.849	0.399317	0.135617	2.94444	0.0032354	0.0410753	CG5071	0.0855171	0.118839
FBgn0051693	113.671	0.675533	0.229507	2.94341	0.00324621	0.0410965	CG31693	0.653442	0.697817
FBgn0030251	1295.85	-0.324544	0.11025	-2.94371	0.003243	0.0410965	CG2145	0.00908661	0.0190992
FBgn0019650	2236.13	-0.269121	0.0914645	-2.94235	0.00325731	0.0411488	toy	0.000277029	0.000939413
FBgn0267163	32.6902	0.839391	0.285252	2.94263	0.00325437	0.0411488	CG45603	0.813788	0.842579
FBgn0032109	75.0345	0.675518	0.229723	2.94058	0.00327602	0.0412967	CG17005	0.653281	0.697708
FBgn0051327	316.2	0.595002	0.202325	2.94082	0.00327345	0.0412967	CG31327	0.519788	0.572291
FBgn0038983	447.795	0.426228	0.145031	2.93889	0.00329395	0.0413901	CG5326	0.136871	0.177702
FBgn0051055	160.981	0.634743	0.215944	2.93939	0.00328856	0.0413901	CG31055	0.591159	0.640291
FBgn0026262	2888.63	-0.275665	0.0937926	-2.93909	0.00329173	0.0413901	Taf3	0.000487449	0.00153994
FBgn0032381	258.257	0.830784	0.282777	2.93794	0.00330397	0.0414719	Mal-B1	0.807661	0.837706
FBgn0034835	169.381	0.674943	0.229804	2.93704	0.00331358	0.0415483	CG3092	0.652307	0.696794
FBgn0051901	26.3002	0.839989	0.286061	2.9364	0.00332044	0.0415901	Mur29B	0.813673	0.842533
FBgn0036030	1853.96	-0.28606	0.0974468	-2.93555	0.00332952	0.0416288	Prps	0.00107988	0.00305643
FBgn0260987	866.641	-0.318595	0.108534	-2.93545	0.00333059	0.0416288	vtd	0.00705923	0.0154065
FBgn0262788	43.9512	0.81555	0.277883	2.93486	0.00333695	0.0416642	CG43169	0.796674	0.82762
FBgn0037759	583.989	0.528233	0.180041	2.93396	0.00334666	0.0417413	CG8526	0.376346	0.432783
FBgn0031749	47.2512	0.791794	0.27019	2.9305	0.00338413	0.0420238	CG14000	0.778014	0.811164
FBgn0028943	71.7102	0.751264	0.256378	2.9303	0.00338634	0.0420238	CG15638	0.74172	0.778971
FBgn0263466	70.534	-0.72646	0.247842	-2.93115	0.00337713	0.0420238	snoRNA:lola-a	0.715973	0.755564
FBgn0058178	1679.57	-0.287172	0.0980141	-2.9299	0.00339069	0.0420238	l(3)80Fg	0.00118981	0.00332606
FBgn0087013	11702.7	0.266795	0.0910568	2.92998	0.00338982	0.0420238	Karybeta3	0.000237772	0.000822852
FBgn0037525	4745.7	-0.313341	0.106899	-2.93119	0.00337664	0.0420238	CG17816	0.00552793	0.0125595
FBgn0029702	282.144	0.570068	0.194609	2.9293	0.00339725	0.042061	CG15572	0.469496	0.524111
FBgn0035964	140.661	-0.556638	0.190194	-2.92668	0.003426	0.0423725	Dhpr	0.440808	0.496833
FBgn0052553	124.785	0.639461	0.218579	2.92554	0.00343861	0.0424839	lncRNA:CR32553	0.598447	0.646878
FBgn0051804	49.3026	0.759443	0.259715	2.92414	0.00345406	0.0426301	CG31804	0.74915	0.785375
FBgn0032848	67.1688	0.703812	0.24092	2.92135	0.00348516	0.042969	nesd	0.689106	0.731202
FBgn0036687	390.449	0.544377	0.186523	2.91855	0.00351661	0.0433005	CG6652	0.413874	0.470253
FBgn0030624	158.725	0.66388	0.227488	2.91831	0.00351938	0.0433005	CG9106	0.63567	0.68112
FBgn0004244	9134.33	-0.288786	0.0989969	-2.91712	0.00353282	0.0433754	Rdl	0.00138679	0.00379465
FBgn0041607	466.998	-0.366247	0.125541	-2.91734	0.00353031	0.0433754	AsnS	0.0407389	0.0640462
FBgn0086907	241.446	0.584783	0.200578	2.91548	0.00355138	0.0434248	Cyt-c-d	0.499643	0.553157
FBgn0033174	303.787	0.498486	0.17098	2.91547	0.00355157	0.0434248	CG11125	0.306509	0.361099
FBgn0036186	64.1707	0.721691	0.247511	2.91579	0.00354784	0.0434248	CG6071	0.709667	0.75032
FBgn0051313	248.41	-0.480422	0.16474	-2.91624	0.00354277	0.0434248	CG31313	0.262851	0.315304
FBgn0015221	2696.29	0.272598	0.0935191	2.91489	0.00355814	0.0434602	Fer2LCH	0.00041872	0.00134524
FBgn0032839	29.5428	-0.830423	0.285193	-2.91179	0.00359362	0.0438481	AANATL3	0.805293	0.835544
FBgn0035293	1089.13	-0.317272	0.109047	-2.90949	0.00362018	0.0441265	CG5687	0.00704782	0.0153873
FBgn0034435	1638.78	0.722558	0.248378	2.90911	0.00362465	0.0441355	fest	0.710203	0.750684
FBgn0000251	268.719	0.54505	0.187435	2.90793	0.00363826	0.0442099	cad	0.415687	0.471813
FBgn0267246	40.8426	0.775935	0.266829	2.90798	0.00363769	0.0442099	asRNA:CR45686	0.762915	0.79775
FBgn0032374	96.5277	0.719171	0.247432	2.90655	0.00365442	0.0443606	CG14931	0.706231	0.746955
FBgn0039768	37.2699	-0.788799	0.271443	-2.90595	0.00366142	0.0443999	CG15533	0.773655	0.807477
FBgn0038722	235.931	0.516684	0.177831	2.90548	0.00366693	0.044421	Nup58	0.350507	0.406558
FBgn0011725	2227.89	0.357861	0.123237	2.90384	0.00368617	0.0446083	twin	0.0326787	0.0538738
FBgn0051803	56.8666	0.756222	0.260451	2.90351	0.00369005	0.0446095	Rsph9	0.744586	0.781326
FBgn0039421	95.4828	0.676099	0.232899	2.90297	0.00369639	0.0446405	CG6036	0.652218	0.696773
FBgn0038281	68.1118	0.739574	0.254822	2.90231	0.00370419	0.0446889	RpL10Aa	0.727989	0.766735
FBgn0083946	138.981	0.698288	0.240643	2.90176	0.00371076	0.0447225	lobo	0.681154	0.723807
FBgn0023479	3199.52	-0.278743	0.0960777	-2.90122	0.00371712	0.0447533	teq	0.000718255	0.00215769
FBgn0030412	4909.74	-0.287769	0.0992484	-2.89948	0.00373777	0.0449562	Tomosyn	0.00137475	0.00376977
FBgn0053489	101.086	0.648972	0.223868	2.89891	0.00374463	0.0449927	CG33489	0.612533	0.660228
FBgn0028903	148.456	0.604163	0.208493	2.89776	0.00375839	0.0451122	CG13243	0.536688	0.588486
FBgn0032835	755.969	-0.356081	0.122912	-2.89704	0.00376697	0.0451234	CG16772	0.0312901	0.0520207
FBgn0020908	102.119	-0.774404	0.267288	-2.89726	0.00376436	0.0451234	Scp1	0.760761	0.795709
FBgn0043070	4265.17	-0.252488	0.0871635	-2.89672	0.00377085	0.045124	MESK2	6.82653e-05	0.000283993
FBgn0040060	1450.77	0.725291	0.250467	2.89576	0.00378246	0.0452171	yip7	0.712352	0.752349
FBgn0053125	389.38	0.580421	0.200647	2.89274	0.00381899	0.0453322	CG33125	0.49097	0.544736
FBgn0033934	612.423	-0.334748	0.115707	-2.89307	0.00381498	0.0453322	CG17385	0.0152904	0.0294877
FBgn0035168	269.879	0.538843	0.18619	2.89406	0.00380298	0.0453322	Cep290	0.402183	0.458561
FBgn0262593	4340.96	-0.329574	0.113868	-2.89434	0.00379952	0.0453322	Shab	0.0124535	0.0249366
FBgn0037014	47.2567	-0.740993	0.256147	-2.89284	0.00381772	0.0453322	CG13251	0.728786	0.767437
FBgn0053340	2278.9	0.669037	0.231205	2.89369	0.00380742	0.0453322	CG33340	0.641934	0.68752
FBgn0039255	239.011	0.495643	0.171295	2.89351	0.00380967	0.0453322	mah	0.301031	0.355569
FBgn0020509	86.8159	0.725126	0.250772	2.89158	0.00383315	0.0454546	Acp62F	0.711894	0.752135
FBgn0053286	154.064	0.589239	0.203973	2.88881	0.00386697	0.0458096	CG33286	0.508364	0.5616
FBgn0031918	55.7538	0.724323	0.250954	2.88627	0.00389832	0.0461346	CG6055	0.710663	0.751103
FBgn0028670	2680.02	0.265238	0.0919528	2.8845	0.0039203	0.0463484	Vha100-2	0.000253484	0.000870587
FBgn0038210	87.9597	0.634733	0.220134	2.8834	0.00393409	0.0464647	CG3199	0.589436	0.638642
FBgn0034776	87.9676	0.657694	0.228209	2.88198	0.00395182	0.0465456	CG13527	0.625026	0.671591
FBgn0035380	152.325	0.634781	0.22025	2.88209	0.00395049	0.0465456	CG9970	0.589474	0.638642
FBgn0015831	51.2486	0.739828	0.256715	2.88191	0.00395277	0.0465456	Rtnl2	0.726832	0.765722
FBgn0083057	655.861	-0.379477	0.131747	-2.88035	0.00397233	0.0467293	snoRNA:Psi18S-110	0.0594149	0.0874067
FBgn0032553	110.886	0.681467	0.236779	2.87808	0.00400108	0.0469739	CG4480	0.658207	0.701889
FBgn0265271	85.0294	0.736157	0.255766	2.87824	0.00399895	0.0469739	CG14717	0.722788	0.762006
FBgn0261582	20.4506	0.822816	0.286114	2.87583	0.00402966	0.0472624	CG42692	0.797105	0.827922
FBgn0031273	53.8537	0.757465	0.263516	2.87445	0.00404726	0.0474217	CG2839	0.743643	0.780573
FBgn0031157	40.6459	0.779275	0.271143	2.87404	0.00405263	0.0474375	CG1503	0.763202	0.797899
FBgn0262945	213.278	0.567921	0.197809	2.87106	0.00409095	0.0478386	lncRNA:CR43264	0.465672	0.520524
FBgn0039760	80.9954	0.706378	0.2462	2.86912	0.0041161	0.048085	CG9682	0.68905	0.731202
FBgn0050178	47.6259	0.736662	0.256856	2.86799	0.00413085	0.0482096	CG30178	0.722606	0.761951
FBgn0002022	254.664	0.444272	0.15497	2.86683	0.00414604	0.0482914	Catsup	0.181976	0.227186
FBgn0030982	10.601	0.795257	0.277396	2.86687	0.0041456	0.0482914	CG7423	0.775805	0.80922
FBgn0028875	4409.9	-0.303488	0.106052	-2.86168	0.00421398	0.0490286	nAChRalpha5	0.00397596	0.00945032
FBgn0000405	148.896	0.536241	0.187425	2.8611	0.0042218	0.0490286	CycB	0.39745	0.454086
FBgn0038488	1252.26	0.305461	0.106755	2.86134	0.00421852	0.0490286	m-cup	0.00442021	0.0103395
FBgn0037059	80.8824	0.661084	0.231165	2.85979	0.00423924	0.0491827	CG10510	0.629034	0.675298
FBgn0036354	123.872	0.603767	0.211163	2.85924	0.00424661	0.0492197	Poc1	0.535479	0.587373
FBgn0050334	60.8954	0.77389	0.270701	2.85884	0.00425198	0.0492336	CG30334	0.757387	0.792601
FBgn0034826	100.214	0.677028	0.237232	2.85387	0.00431904	0.0499122	CG13544	0.651022	0.695926
FBgn0036345	60.1904	0.736444	0.258036	2.85403	0.0043168	0.0499122	CG17300	0.721417	0.760832
FBgn0011668	427.109	0.763537	0.267665	2.85258	0.00433654	0.0500654	Mst57Da	0.747664	0.784005
FBgn0004611	5214.63	-0.288165	0.101113	-2.84993	0.00437293	0.0501142	Plc21C	0.00166607	0.00444361
FBgn0261608	3529.95	0.376418	0.132065	2.85025	0.00436851	0.0501142	RpL37A	0.0571562	0.0845761
FBgn0250840	276.62	0.579122	0.203193	2.85011	0.00437038	0.0501142	CG12907	0.488535	0.542489
FBgn0261611	480.267	-0.363617	0.127514	-2.85159	0.00435017	0.0501142	CG42700	0.041295	0.0646705
FBgn0034127	132.707	0.603529	0.211772	2.8499	0.00437335	0.0501142	CG7848	0.534931	0.586882
FBgn0005626	1659.49	-0.378397	0.13278	-2.84979	0.00437474	0.0501142	ple	0.05989	0.0880274
FBgn0082967	165.844	-0.534629	0.18748	-2.85167	0.00434909	0.0501142	snoRNA:Psi28S-3327a	0.394167	0.450772
FBgn0037580	1406.1	0.332564	0.116673	2.85041	0.00436635	0.0501142	DppIII	0.0152589	0.0294587
FBgn0259214	4598.34	-0.248825	0.0873587	-2.84832	0.00439511	0.0502987	PMCA	5.95968e-05	0.0002532
FBgn0036498	86.2426	0.655983	0.230503	2.84587	0.00442898	0.0506372	CG13455	0.621001	0.66783
FBgn0040092	101.144	0.673513	0.236704	2.84539	0.00443576	0.0506656	lectin-46Cb	0.645835	0.691133
FBgn0051779	31.3519	0.803807	0.282543	2.8449	0.00444254	0.0506939	Acp24A4	0.780698	0.813531
FBgn0034173	204.02	0.566738	0.199284	2.84387	0.00445689	0.0508085	CG9010	0.463568	0.518608
FBgn0037276	271.978	0.555261	0.195322	2.8428	0.00447193	0.0509308	CG17387	0.439568	0.495627
FBgn0259224	2533.52	-0.279806	0.0984542	-2.84199	0.00448326	0.0509759	CG42324	0.000969312	0.00278392
FBgn0002873	347.803	0.506545	0.178242	2.8419	0.00448453	0.0509759	mud	0.329986	0.385142
FBgn0035800	147.454	0.578873	0.203858	2.83959	0.00451713	0.0512861	CG7716	0.488084	0.542091
FBgn0036670	22.2985	0.812308	0.286089	2.83935	0.00452051	0.0512861	CG13029	0.786596	0.818898
FBgn0023407	6922.65	-0.26014	0.0916416	-2.83867	0.00453022	0.0513469	B4	0.000196688	0.000699558
FBgn0046297	1056.02	0.683105	0.240959	2.83494	0.00458337	0.0517746	lncRNA:CR9284	0.658106	0.701845
FBgn0082988	136.402	-0.616633	0.21748	-2.83535	0.00457749	0.0517746	snoRNA:Psi28S-2442b	0.557892	0.608675
FBgn0250908	1610.16	-0.330207	0.116484	-2.8348	0.00458551	0.0517746	beat-VII	0.0143694	0.0280491
FBgn0052650	93.6772	0.639859	0.225701	2.83498	0.00458283	0.0517746	CG32650	0.596086	0.64468
FBgn0036221	33.2229	0.78607	0.277414	2.83356	0.00460323	0.0518259	CG11588	0.765754	0.800293
FBgn0004414	67.8704	0.762197	0.268987	2.83358	0.004603	0.0518259	msopa	0.745018	0.781669
FBgn0027101	1939.69	-0.325786	0.114951	-2.83413	0.00459507	0.0518259	Dyrk3	0.0120769	0.0243146
FBgn0051798	103.271	0.643181	0.227096	2.83219	0.004623	0.0519584	CG31798	0.601163	0.649293
FBgn0035014	109.256	0.654424	0.231096	2.83182	0.00462835	0.0519584	CG13581	0.61813	0.665046
FBgn0086665	172.401	-0.567615	0.200431	-2.83197	0.00462625	0.0519584	snoRNA:Psi18S-1377a	0.465513	0.520404
FBgn0019985	1009.87	-0.31411	0.110933	-2.83153	0.00463261	0.0519584	mGluR	0.00731135	0.015854
FBgn0037326	1597.88	-0.308035	0.108834	-2.83033	0.00465004	0.0521043	CG14669	0.00547182	0.0124464
FBgn0052240	140.77	0.621473	0.219836	2.82698	0.00469894	0.0526023	CG32240	0.565952	0.616272
FBgn0039755	30.528	0.787886	0.279005	2.82391	0.00474413	0.0530578	CG15531	0.766482	0.800868
FBgn0260991	64.1248	0.680204	0.240947	2.82304	0.00475701	0.0531514	Incenp	0.653681	0.69801
FBgn0250757	907.733	0.383425	0.135861	2.8222	0.0047696	0.0532418	CG42235	0.0689825	0.0991566
FBgn0034605	242.444	-0.445038	0.15778	-2.82062	0.00479313	0.0534538	Ugt49C1	0.187585	0.233348
FBgn0036708	157.093	0.531384	0.188426	2.82012	0.0048006	0.0534866	CG13725	0.388072	0.444664
FBgn0033499	45.0858	0.766621	0.271914	2.81935	0.00481215	0.0535647	CG12914	0.747956	0.784194
FBgn0052657	118.252	0.613039	0.217465	2.81903	0.00481692	0.0535672	lncRNA:CR32657	0.551364	0.602333
FBgn0005612	1227.54	-0.297603	0.105612	-2.81788	0.00483423	0.0537091	Sox14	0.00325535	0.00794898
FBgn0264607	3741.74	-0.262449	0.0931686	-2.81692	0.00484866	0.0538187	CaMKII	0.00026847	0.000913806
FBgn0035533	2383.32	-0.262524	0.0932057	-2.81661	0.00485336	0.0538202	Cip4	0.000270658	0.00092019
FBgn0034483	151.713	0.635994	0.225866	2.81581	0.00486547	0.0539039	CG16894	0.589375	0.638642
FBgn0261529	367.845	0.478674	0.170041	2.81505	0.00487699	0.0539808	ms(2)34Fe	0.26596	0.318418
FBgn0085195	253.882	-0.54476	0.193692	-2.8125	0.00491581	0.0542072	CG34166	0.417787	0.473786
FBgn0033063	101.54	0.718148	0.255312	2.81283	0.00491082	0.0542072	CG14589	0.699046	0.74075
FBgn0034792	984.144	0.338456	0.120338	2.81254	0.00491513	0.0542072	YME1L	0.0202577	0.0370447
FBgn0029993	81.0683	0.682973	0.242792	2.813	0.00490821	0.0542072	CG1571	0.656777	0.700744
FBgn0020236	5059.73	-0.251897	0.0896171	-2.81081	0.00494168	0.0543986	ATPCL	0.000100985	0.000395951
FBgn0039714	651.416	0.33708	0.119925	2.81076	0.00494239	0.0543986	Zip99C	0.019368	0.0357418
FBgn0033443	98.3791	0.62558	0.22263	2.80996	0.00495481	0.0544337	CG1698	0.572383	0.622279
FBgn0040063	19.164	0.803904	0.286064	2.81023	0.00495065	0.0544337	yip3	0.777971	0.811164
FBgn0053296	19.27	-0.803855	0.286111	-2.80959	0.00496043	0.0544447	CG33296	0.777882	0.811164
FBgn0037516	28.2044	0.800829	0.285072	2.80922	0.00496616	0.054457	CG11286	0.775546	0.809021
FBgn0037486	170.573	0.665306	0.236997	2.80723	0.00499688	0.054743	CG14605	0.632697	0.678613
FBgn0037007	1514.22	0.287599	0.102469	2.8067	0.00500524	0.0547837	BNIP3	0.00185406	0.00486037
FBgn0250822	89.0592	0.682583	0.243335	2.80511	0.00502989	0.0548588	CG34222	0.655855	0.700077
FBgn0034049	1068.62	0.292921	0.104417	2.80529	0.00502707	0.0548588	bdg	0.00258	0.00649626
FBgn0050177	92.7186	0.656534	0.234053	2.80506	0.0050307	0.0548588	CG30177	0.620118	0.667062
FBgn0011327	256.177	0.493379	0.175837	2.80589	0.00501784	0.0548588	Uch-L5	0.301239	0.355744
FBgn0050043	28.3759	0.789819	0.281639	2.80436	0.00504162	0.0548765	CG30043	0.766501	0.800868
FBgn0033952	151.628	0.631813	0.225275	2.80463	0.00503742	0.0548765	Adgf-E	0.582374	0.631704
FBgn0085421	3717.2	-0.238054	0.0849323	-2.80287	0.00506502	0.0550482	Epac	2.20831e-05	0.00010843
FBgn0004921	16246.9	-0.271202	0.0967625	-2.80276	0.00506673	0.0550482	Ggamma1	0.00059226	0.00182379
FBgn0034438	309.693	-0.411351	0.146793	-2.80224	0.00507487	0.0550859	CG9416	0.118465	0.157092
FBgn0037512	87.7916	0.657687	0.234761	2.80152	0.00508624	0.0551586	CG2616	0.621636	0.668329
FBgn0033834	274.239	0.534206	0.19087	2.7988	0.00512924	0.0555135	CG4744	0.39515	0.451721
FBgn0033862	276.868	0.598134	0.213725	2.79861	0.00513229	0.0555135	CG6209	0.524571	0.577072
FBgn0035287	1051.91	-0.355218	0.126929	-2.79856	0.00513308	0.0555135	CG13937	0.035146	0.0569619
FBgn0032131	45.9416	0.748747	0.267789	2.79603	0.00517351	0.0558995	CG3841	0.729604	0.768162
FBgn0044510	324.574	-0.432596	0.154765	-2.79518	0.00518715	0.0559956	mRpS5	0.162434	0.205884
FBgn0039890	1991.92	-0.263583	0.0943598	-2.79338	0.00521606	0.0562562	Abcd1	0.000329731	0.00109299
FBgn0033820	3419.7	0.273615	0.0979769	2.79264	0.0052279	0.0563325	CG4716	0.000742076	0.00221964
FBgn0029603	55.1659	0.69374	0.248507	2.79163	0.00524433	0.0564579	CG14053	0.669207	0.712653
FBgn0264349	13.4515	0.767245	0.274972	2.79027	0.00526647	0.0566446	lncRNA:CR43805	0.746307	0.782743
FBgn0267383	160.083	0.600361	0.215369	2.78759	0.00531011	0.057062	Ubc87F	0.528499	0.580581
FBgn0020385	3765.93	-0.336955	0.120934	-2.78627	0.00533187	0.0572436	pug	0.0201448	0.036904
FBgn0039800	1886.49	0.276563	0.0993106	2.78483	0.00535554	0.0574454	Npc2g	0.000950112	0.00273708
FBgn0013681	281.461	0.513795	0.18452	2.7845	0.00536107	0.0574526	mt:ND3	0.349864	0.405891
FBgn0038878	721.213	-0.321046	0.115345	-2.78336	0.00537996	0.0576027	CG3301	0.0110668	0.0225629
FBgn0085382	1173.34	-0.36417	0.130918	-2.78166	0.00540818	0.0578523	CG34353	0.0458505	0.0702432
FBgn0036785	232.846	0.577177	0.207519	2.78132	0.00541384	0.0578605	CG13700	0.485037	0.539215
FBgn0032397	733.922	0.392252	0.141226	2.77749	0.00547813	0.0584346	Tom70	0.0861959	0.119627
FBgn0052407	429.397	-0.372008	0.133949	-2.77723	0.00548242	0.0584346	CG32407	0.0559389	0.0830576
FBgn0031129	347.003	0.499939	0.179978	2.77778	0.00547319	0.0584346	CG1324	0.318317	0.373221
FBgn0265270	33.32	0.786437	0.283239	2.77658	0.00549337	0.0584571	lncRNA:CR43239	0.761558	0.796401
FBgn0052238	152.813	0.579384	0.208673	2.77652	0.00549444	0.0584571	TTLL1B	0.489336	0.543328
FBgn0003499	855.739	-0.422422	0.152159	-2.77618	0.00550019	0.0584655	sr	0.142709	0.184108
FBgn0036224	38.2217	0.752931	0.271261	2.77567	0.00550877	0.058504	Rpt4R	0.732113	0.770504
FBgn0003382	14.5077	0.778141	0.280466	2.77445	0.00552947	0.058671	sha	0.754517	0.789949
FBgn0000157	632.864	-0.382865	0.138042	-2.77354	0.00554505	0.058678	Dll	0.0715936	0.102324
FBgn0037973	187.777	-0.467218	0.168423	-2.77407	0.00553596	0.058678	CG18547	0.242244	0.293269
FBgn0039420	528.902	-0.357673	0.128958	-2.77357	0.00554447	0.058678	CG6154	0.0389913	0.0617847
FBgn0264432	129.438	-0.563686	0.203308	-2.77257	0.00556156	0.0588001	CG43850	0.458326	0.513605
FBgn0011596	344.892	0.414347	0.149519	2.77121	0.00558488	0.0589938	fzo	0.126915	0.166687
FBgn0037461	110.418	0.606948	0.219128	2.76983	0.00560855	0.0591908	CG15177	0.539959	0.591682
FBgn0037101	282.886	0.567188	0.204873	2.76849	0.00563175	0.0593826	CG7634	0.465432	0.520362
FBgn0031260	528.878	0.382947	0.138352	2.76791	0.00564167	0.059434	Spp	0.0721236	0.102944
FBgn0038690	75.558	0.718983	0.259866	2.76675	0.00566187	0.0595404	CG11703	0.696979	0.738692
FBgn0030160	742.925	-0.327316	0.118298	-2.76688	0.00565962	0.0595404	CG9691	0.0147053	0.0286006
FBgn0027539	556.989	0.353227	0.127698	2.76611	0.00567292	0.0596035	lili	0.034784	0.0565385
FBgn0011288	3598.42	-0.296313	0.107161	-2.76513	0.00569009	0.0597307	Snap25	0.00353419	0.0085467
FBgn0036089	19.368	0.789618	0.285785	2.76297	0.00572775	0.0600726	CG14151	0.76304	0.797809
FBgn0263470	748.55	0.74451	0.269504	2.76251	0.0057358	0.0601036	snoRNA:Tudor-SN-a	0.723076	0.762173
FBgn0026141	132.809	0.551041	0.199615	2.76053	0.00577084	0.0601503	Cdlc2	0.432531	0.488441
FBgn0042701	58.4325	-0.698131	0.252865	-2.76088	0.00576455	0.0601503	CR12628	0.672759	0.716047
FBgn0034538	149.258	0.509186	0.184438	2.76075	0.0057669	0.0601503	CG16799	0.340591	0.396303
FBgn0085287	19.0587	0.790003	0.286037	2.76189	0.00574682	0.0601503	CG34258	0.763261	0.797899
FBgn0058160	753.115	-0.3229	0.116937	-2.76132	0.00575688	0.0601503	CG40160	0.0125111	0.0250391
FBgn0030359	192.601	0.608677	0.220448	2.76109	0.00576082	0.0601503	CG18130	0.542833	0.594415
FBgn0029662	70.8907	0.685106	0.248215	2.76013	0.0057778	0.0601697	CG12206	0.656693	0.700719
FBgn0024740	48.2358	-0.728522	0.264183	-2.75764	0.0058221	0.0605776	Lip2	0.706575	0.747251
FBgn0000114	2672	0.330038	0.119717	2.75682	0.00583671	0.060676	bru1	0.0166111	0.0315934
FBgn0003888	563.295	0.410294	0.148857	2.75631	0.00584583	0.0607173	betaTub60D	0.120318	0.159226
FBgn0083936	62.1446	0.734822	0.266699	2.75525	0.00586467	0.0608595	Acp54A1	0.71291	0.752772
FBgn0035227	3227.32	-0.307622	0.111678	-2.75455	0.00587735	0.060884	Iml1	0.00650693	0.014428
FBgn0029945	145.338	0.582318	0.211397	2.75462	0.00587604	0.060884	Acsf3	0.495009	0.548491
FBgn0259967	10.4975	0.716826	0.260435	2.75242	0.00591561	0.0612266	Sfp53D	0.693685	0.735465
FBgn0040755	17.3097	0.784914	0.285278	2.7514	0.00593419	0.061365	CG17580	0.758317	0.793505
FBgn0028857	132.609	0.633116	0.230577	2.74579	0.00603654	0.0623688	CG12448	0.582714	0.632014
FBgn0051204	268.282	0.565238	0.205937	2.74472	0.00605628	0.062518	CG31204	0.461848	0.517041
FBgn0052181	458.43	0.457922	0.166926	2.74327	0.00608307	0.0626848	CG32181	0.223311	0.272755
FBgn0051361	1059.31	0.329826	0.12022	2.74353	0.00607825	0.0626848	dpr17	0.0169082	0.0320316
FBgn0030823	37.4759	0.751422	0.274007	2.74235	0.00610017	0.0628062	TTLL1A	0.728241	0.766932
FBgn0043532	19.9526	0.783838	0.286153	2.73922	0.00615843	0.0633508	Obp56i	0.756471	0.791854
FBgn0267326	18402.6	0.752844	0.275012	2.7375	0.00619082	0.0636285	Ntl	0.729219	0.767825
FBgn0053490	89.1466	0.682382	0.249362	2.73651	0.00620944	0.0637643	CG33490	0.651982	0.696637
FBgn0033285	716.788	0.682158	0.249319	2.73608	0.00621757	0.0637923	CG18449	0.651673	0.69637
FBgn0000079	636.096	-0.43199	0.157937	-2.73521	0.00623406	0.0639003	Amy-p	0.16638	0.210005
FBgn0051473	77.8439	0.675271	0.24693	2.73467	0.00624434	0.0639003	CG31473	0.642715	0.688106
FBgn0011642	1396.29	-0.31732	0.116024	-2.73495	0.00623901	0.0639003	Zyx	0.0105336	0.0216172
FBgn0031694	111.775	-0.552009	0.201934	-2.73361	0.00626442	0.064006	Cyp4ac2	0.435185	0.491296
FBgn0053284	307.436	0.520678	0.190477	2.73355	0.00626552	0.064006	CG33284	0.367873	0.42428
FBgn0033465	712.657	-0.348087	0.127732	-2.72513	0.00642757	0.0655635	Etf-QO	0.0318362	0.0527576
FBgn0039520	16.3938	0.77766	0.285406	2.72476	0.00643492	0.0655635	Gr98a	0.750217	0.786085
FBgn0029828	548.777	-0.330655	0.121347	-2.72487	0.00643262	0.0655635	CG6067	0.0180544	0.0337937
FBgn0031139	96.2887	0.626284	0.229872	2.72448	0.00644021	0.0655635	CG11227	0.571329	0.621495
FBgn0086348	653.508	-0.32515	0.119398	-2.72324	0.0064646	0.0657028	se	0.014777	0.0287069
FBgn0025378	34.6335	0.76418	0.280617	2.72321	0.00646503	0.0657028	CG3795	0.738476	0.776117
FBgn0053100	3803.71	-0.256699	0.0942932	-2.72234	0.00648205	0.0658191	eIF4EHP	0.000249483	0.000858345
FBgn0061197	3095.39	0.656632	0.241333	2.72086	0.00651123	0.066027	salto	0.616757	0.66381
FBgn0033963	114.009	0.581868	0.213864	2.72073	0.00651372	0.066027	CG12857	0.494227	0.54779
FBgn0000043	836.3	0.38825	0.142723	2.72031	0.00652217	0.0660559	Act42A	0.0840589	0.117329
FBgn0028935	143.962	0.622333	0.228962	2.71806	0.00656665	0.0664493	CG7653	0.564826	0.615216
FBgn0250825	40.0959	0.770056	0.283564	2.71564	0.00661486	0.0668798	CG34241	0.743039	0.780217
FBgn0039398	569.187	0.488072	0.180116	2.70976	0.00673321	0.0680181	CG14540	0.295311	0.349338
FBgn0002856	34.0352	0.764554	0.282218	2.70909	0.00674679	0.0680698	Acp26Ab	0.737729	0.775539
FBgn0266369	829.167	-0.332675	0.122806	-2.70894	0.00674986	0.0680698	Mtp	0.0199708	0.036665
FBgn0032609	210.053	0.499174	0.184328	2.70807	0.00676757	0.06819	CG13280	0.320818	0.375818
FBgn0260766	77.2335	0.685304	0.253286	2.70565	0.00681702	0.0685712	CG42564	0.654006	0.698293
FBgn0030040	90.7813	0.603816	0.223167	2.70567	0.00681665	0.0685712	CG15347	0.533663	0.585763
FBgn0036440	19.6734	0.773551	0.285961	2.70509	0.0068285	0.0686282	CG17177	0.74521	0.78178
FBgn0028561	122.59	0.594413	0.219931	2.70272	0.00687738	0.0690606	sut3	0.517137	0.56985
FBgn0011589	491.094	-0.349267	0.129246	-2.70233	0.00688553	0.0690837	Elk	0.034105	0.0556726
FBgn0029730	137.445	0.542539	0.20081	2.70175	0.00689758	0.0691458	boil	0.416341	0.472373
FBgn0034509	260.481	-0.426842	0.158044	-2.70078	0.0069178	0.069247	Obp57c	0.158538	0.201552
FBgn0034713	95.36	0.663924	0.245834	2.7007	0.00691942	0.069247	CG11291	0.62597	0.672377
FBgn0032266	746.322	-0.332889	0.123386	-2.69795	0.00697671	0.0695142	CG18302	0.0205275	0.0374164
FBgn0023416	1146.89	-0.304138	0.112737	-2.69777	0.00698046	0.0695142	Ac3	0.00636962	0.0141608
FBgn0036302	492.52	-0.335799	0.124436	-2.69856	0.00696392	0.0695142	sowah	0.0226238	0.0403485
FBgn0051245	143.32	0.616786	0.228553	2.69866	0.006962	0.0695142	CG31245	0.55537	0.606092
FBgn0038716	135.649	0.554649	0.205557	2.69827	0.00697003	0.0695142	CG7342	0.44138	0.49729
FBgn0004047	2322.01	-0.726121	0.26916	-2.69773	0.00698147	0.0695142	Yp3	0.700014	0.741509
FBgn0086450	474.366	-0.344602	0.127793	-2.69656	0.00700598	0.0696531	su(r)	0.0299954	0.0503008
FBgn0030105	26.5975	-0.761987	0.282584	-2.6965	0.00700723	0.0696531	CG15369	0.73449	0.772617
FBgn0085239	31.4458	0.751772	0.278976	2.69475	0.00704405	0.0699308	CG34210	0.725058	0.763989
FBgn0058045	550.711	-0.328224	0.12182	-2.69433	0.00705294	0.0699308	CG40045	0.0175365	0.032976
FBgn0037514	48.7474	0.697272	0.258777	2.69449	0.00704955	0.0699308	CG10919	0.667857	0.711407
FBgn0032265	33.5839	0.766711	0.284683	2.69321	0.00707686	0.0700502	CG18301	0.738401	0.776107
FBgn0026169	507.817	-0.391178	0.145243	-2.69327	0.00707541	0.0700502	snoRNA:Psi18S-1820	0.0910668	0.125194
FBgn0051956	52.2488	0.726476	0.269872	2.69192	0.00710409	0.0700846	Pgant4	0.69999	0.741509
FBgn0023096	213.462	-0.490771	0.182303	-2.69207	0.0071011	0.0700846	btv	0.302692	0.357317
FBgn0035666	50.2764	0.73835	0.274273	2.69202	0.00710199	0.0700846	Jon65Aii	0.712005	0.752178
FBgn0051496	22.0952	0.769609	0.285858	2.69228	0.00709656	0.0700846	CG31496	0.74084	0.778185
FBgn0051104	39.0072	-0.746937	0.277521	-2.69147	0.00711386	0.0701224	CG31104	0.720272	0.759761
FBgn0032066	67.9436	-0.720965	0.267989	-2.69028	0.00713926	0.070314	LManIII	0.694096	0.735835
FBgn0039369	59.4745	0.731807	0.27206	2.68988	0.00714785	0.0703399	CG17195	0.705316	0.746254
FBgn0031800	723.571	-0.335248	0.124654	-2.68943	0.00715738	0.0703749	CG9497	0.0225748	0.0402977
FBgn0029949	63.2519	0.698717	0.259893	2.68849	0.0071777	0.0705159	CG15035	0.669198	0.712653
FBgn0050393	106.462	0.560829	0.208712	2.68709	0.00720771	0.0707519	CG30393	0.453974	0.509532
FBgn0260964	8421.32	-0.26078	0.0971141	-2.68529	0.00724666	0.0710161	Vmat	0.000421665	0.00135397
FBgn0260481	100.891	0.632304	0.235459	2.68541	0.00724407	0.0710161	CG32454	0.579675	0.629065
FBgn0052436	2988.92	0.616075	0.229467	2.68481	0.00725703	0.0710587	CG32436	0.553926	0.604795
FBgn0034053	321.381	0.414873	0.154603	2.68347	0.00728626	0.0712857	Cyp4aa1	0.135629	0.176362
FBgn0032187	190.353	0.595013	0.221801	2.68264	0.00730437	0.0714036	CG4839	0.518071	0.570774
FBgn0033271	193.839	0.61419	0.228977	2.68232	0.00731128	0.0714121	CG8708	0.550785	0.601812
FBgn0037801	89.6621	-0.587396	0.21914	-2.68046	0.00735214	0.0717517	CG3999	0.50443	0.557829
FBgn0004574	1265.19	-0.272362	0.101636	-2.67977	0.00736726	0.0717767	Rop	0.00105012	0.0029815
FBgn0040827	2826.3	0.276459	0.103165	2.67978	0.00736716	0.0717767	CG13315	0.00139312	0.00380951
FBgn0023213	5350.73	-0.226838	0.0846563	-2.67951	0.00737294	0.0717767	eIF4G1	1.16669e-05	6.34683e-05
FBgn0032820	417.875	-0.370995	0.138517	-2.67834	0.00739891	0.0719701	fbp	0.0612095	0.0895886
FBgn0261686	104.961	0.601067	0.224482	2.67758	0.0074157	0.072074	CG42733	0.528596	0.580634
FBgn0082980	204.447	-0.507164	0.189532	-2.67588	0.00745334	0.0723802	snoRNA:Psi28S-2996	0.340727	0.396383
FBgn0083972	108.411	-0.597345	0.223661	-2.67076	0.00756797	0.0734118	CG34136	0.522075	0.574594
FBgn0029989	18.2307	0.764162	0.286141	2.67058	0.00757201	0.0734118	CG15333	0.734429	0.772617
FBgn0042198	63.1715	0.733309	0.274672	2.66977	0.00759036	0.0735292	CG16741	0.705432	0.74631
FBgn0010473	5852.11	-0.256585	0.0961295	-2.66916	0.00760411	0.0736021	tutl	0.000317749	0.00105892
FBgn0036072	196.713	0.623484	0.23373	2.66753	0.00764105	0.073778	CG6628	0.565453	0.615785
FBgn0037164	103.546	0.562494	0.210857	2.66766	0.00763823	0.073778	CG11438	0.45757	0.512934
FBgn0029864	2664.85	-0.300094	0.112489	-2.66776	0.00763578	0.073778	CG15894	0.00566401	0.0128193
FBgn0034497	915.646	-0.404484	0.151794	-2.66469	0.00770601	0.0743444	Mpcp1	0.117226	0.155607
FBgn0039928	3815.86	-0.237846	0.0892825	-2.66397	0.00772236	0.0744413	Cals	5.05699e-05	0.000220651
FBgn0054051	44.9511	0.743311	0.279065	2.66358	0.00773137	0.0744673	CG34051	0.714788	0.754584
FBgn0032350	2009.23	-0.247666	0.0930188	-2.66253	0.00775546	0.0745776	CG6287	0.00014386	0.000537264
FBgn0032878	142.616	0.621014	0.233221	2.66277	0.00775012	0.0745776	CG9316	0.561424	0.612019
FBgn0086658	120.425	-0.555047	0.208564	-2.66128	0.00778436	0.0747336	snoRNA:Psi28S-1180	0.442972	0.498798
FBgn0038123	75.7967	0.653133	0.245405	2.66145	0.00778053	0.0747336	CG8508	0.609413	0.657345
FBgn0038345	58.7621	0.685944	0.258039	2.65829	0.00785372	0.0753382	CG5213	0.652228	0.696773
FBgn0030989	30.93	0.730588	0.274922	2.65743	0.00787382	0.0754697	Inx5	0.701839	0.742842
FBgn0033900	433.015	0.420781	0.158395	2.65653	0.00789505	0.0756118	CysRS-m	0.149977	0.192009
FBgn0032519	71.5868	0.663278	0.249733	2.65595	0.00790847	0.075619	CG16957	0.623086	0.669645
FBgn0266588	34.6616	0.752337	0.283265	2.65595	0.00790862	0.075619	lncRNA:CR45113	0.722698	0.761979
FBgn0039801	1018.82	0.31468	0.118508	2.65534	0.00792284	0.0756936	Npc2h	0.0112828	0.022939
FBgn0250821	90.7152	0.656745	0.247423	2.65434	0.00794645	0.0758577	CG14644	0.614138	0.661716
FBgn0036415	173.229	0.529198	0.199501	2.65261	0.00798723	0.0760947	CG7768	0.389922	0.44635
FBgn0036962	148.661	0.540743	0.203861	2.65251	0.00798953	0.0760947	CG17122	0.414139	0.470464
FBgn0003132	107.528	0.610582	0.230194	2.65247	0.00799062	0.0760947	Pp1-13C	0.544309	0.595674
FBgn0050118	5075.33	-0.237726	0.0896557	-2.65154	0.0080125	0.0762415	Ttd14	5.37522e-05	0.000231962
FBgn0263112	1191.16	-0.280036	0.105794	-2.64701	0.00812079	0.0772096	Mitf	0.00197406	0.00513839
FBgn0034841	96.9731	0.642807	0.24287	2.64672	0.00812777	0.0772138	CG13541	0.594126	0.642856
FBgn0035384	121.437	0.648897	0.245199	2.64641	0.0081352	0.0772222	CG2113	0.602855	0.650868
FBgn0053963	68.7195	-0.628195	0.237419	-2.64593	0.00814667	0.0772689	lncRNA:CR33963	0.572246	0.622206
FBgn0039464	809.56	-0.294953	0.111497	-2.64538	0.00815987	0.077332	CG6330	0.0046471	0.0108038
FBgn0032375	16.6527	0.753977	0.285292	2.64283	0.00822163	0.0777096	CG14932	0.723218	0.762255
FBgn0038919	72.2908	0.611707	0.23146	2.64282	0.00822194	0.0777096	Qsox2	0.545995	0.597297
FBgn0039041	46.7455	0.720584	0.272675	2.64265	0.00822606	0.0777096	CG13838	0.690537	0.73259
FBgn0030313	61.4722	0.690014	0.261101	2.64271	0.00822443	0.0777096	Reepl1	0.656284	0.700409
FBgn0003140	36.1873	0.733253	0.27777	2.63979	0.00829584	0.0783061	PpY-55A	0.703281	0.744235
FBgn0016926	6151.81	0.229128	0.0868486	2.63824	0.00833373	0.0786008	Pino	2.09101e-05	0.000103804
FBgn0033377	1691.21	0.323581	0.122707	2.63702	0.00836388	0.0787594	Pgm2a	0.0165805	0.0315506
FBgn0051516	45.1067	0.699082	0.265094	2.63711	0.0083616	0.0787594	CG31516	0.666579	0.710175
FBgn0039681	236.496	-0.419366	0.159058	-2.63655	0.00837528	0.0788038	CG7582	0.148914	0.190818
FBgn0264353	32.4186	0.732134	0.277872	2.63479	0.00841895	0.0791515	asRNA:CR43809	0.701819	0.742842
FBgn0260644	19.8071	0.749012	0.284473	2.63298	0.00846391	0.0794476	CG42536	0.717922	0.757485
FBgn0039463	50.8491	0.668783	0.253992	2.63309	0.0084612	0.0794476	Spag1	0.629304	0.675404
FBgn0250845	723.103	0.702033	0.26682	2.63111	0.00851077	0.079824	CG1288	0.669582	0.712988
FBgn0033364	107.076	0.640725	0.243694	2.62921	0.00855826	0.0802056	CG13747	0.590496	0.639631
FBgn0036807	75.7556	0.606884	0.231139	2.62563	0.00864886	0.0809904	CG6893	0.53778	0.589508
FBgn0036142	363.216	0.425606	0.16216	2.62461	0.00867492	0.08117	Adck5	0.162875	0.206332
FBgn0038577	133.492	0.523888	0.199673	2.62373	0.00869739	0.0813158	CG12321	0.379851	0.436346
FBgn0260943	19862.3	-0.262289	0.100002	-2.62283	0.00872034	0.0814658	Rbp6	0.000626208	0.00191483
FBgn0035138	27.7538	0.742701	0.28337	2.62095	0.00876842	0.0818501	CG13884	0.711117	0.751506
FBgn0004379	137.656	0.555584	0.212074	2.61976	0.00879913	0.0820218	Klp67A	0.44491	0.500455
FBgn0005585	2699.82	0.226538	0.0864749	2.6197	0.00880071	0.0820218	Calr	1.70029e-05	8.75307e-05
FBgn0052252	31.2529	0.743476	0.284137	2.61661	0.00888069	0.0826367	asRNA:CR32252	0.711536	0.751824
FBgn0038423	152.913	0.604722	0.231086	2.61687	0.00887398	0.0826367	CG10317	0.534071	0.58607
FBgn0083945	61.5213	0.653317	0.249777	2.6156	0.00890705	0.0827844	CG34109	0.607828	0.655936
FBgn0010407	142.053	-0.481135	0.183958	-2.61547	0.0089106	0.0827844	Ror	0.286239	0.339833
FBgn0032649	128.698	0.576292	0.220515	2.61339	0.00896496	0.0830058	CG15145	0.484319	0.538619
FBgn0034196	23.8194	0.743373	0.284497	2.61294	0.00897664	0.0830058	CG15605	0.711172	0.751506
FBgn0036024	131.037	-0.559976	0.214299	-2.61305	0.00897372	0.0830058	CG18180	0.45359	0.50915
FBgn0042094	398.758	0.435597	0.166685	2.61329	0.00896739	0.0830058	Ak3	0.185101	0.230478
FBgn0039503	45.9487	0.727794	0.278474	2.61351	0.00896186	0.0830058	CG14262	0.695992	0.737779
FBgn0030050	67.4714	0.680568	0.260401	2.61354	0.00896099	0.0830058	CG12111	0.643246	0.688612
FBgn0085486	121.391	0.634669	0.242931	2.61255	0.00898694	0.083036	CG34457	0.581062	0.630397
FBgn0086661	300.158	-0.449592	0.172154	-2.61157	0.00901262	0.0832081	snoRNA:Psi28S-2566	0.215835	0.264364
FBgn0026563	1298.71	0.41657	0.159561	2.61073	0.00903502	0.0833017	CG1979	0.145632	0.187285
FBgn0039668	1581.6	0.279485	0.107055	2.61066	0.00903689	0.0833017	Trc8	0.00216237	0.00557563
FBgn0261991	13.4823	-0.728517	0.27914	-2.60986	0.00905791	0.0833653	CG42809	0.69647	0.738219
FBgn0004174	1215.62	0.651996	0.249808	2.60999	0.00905449	0.0833653	Mst84Dc	0.605781	0.653846
FBgn0051093	22.9366	0.745618	0.285766	2.60919	0.00907572	0.0834641	CG31093	0.713008	0.752772
FBgn0043825	74.3569	0.651209	0.249706	2.60791	0.0091098	0.0836664	CG18284	0.604611	0.652643
FBgn0034437	17.7224	0.744804	0.285632	2.60756	0.00911889	0.0836664	CG10051	0.712126	0.752178
FBgn0262681	14.2198	0.735684	0.282188	2.60707	0.00913204	0.0836664	lncRNA:CR43151	0.70337	0.744262
FBgn0035638	194.365	0.51201	0.196372	2.60735	0.0091246	0.0836664	Tektin-C	0.355133	0.411201
FBgn0003124	195.59	0.481366	0.184642	2.60703	0.00913317	0.0836664	polo	0.287376	0.340982
FBgn0052037	17.2733	0.742874	0.285278	2.60404	0.00921329	0.0843145	CG32037	0.710051	0.750658
FBgn0085321	81.2132	0.616196	0.236648	2.60385	0.00921821	0.0843145	CG34292	0.552501	0.603295
FBgn0051805	105.87	0.583641	0.224286	2.60222	0.00926225	0.0845884	CG31805	0.49765	0.551106
FBgn0037889	335.469	0.710005	0.272847	2.60221	0.00926249	0.0845884	scpr-A	0.676628	0.71971
FBgn0040763	68.4139	0.660032	0.253716	2.60146	0.00928266	0.0846571	CG18336	0.61634	0.663491
FBgn0023023	863.515	-0.309713	0.119056	-2.6014	0.00928437	0.0846571	CRMP	0.0103908	0.0213798
FBgn0013683	749.575	0.683818	0.263005	2.60001	0.00932198	0.0849344	mt:ND4L	0.646493	0.691711
FBgn0035619	103.559	0.584994	0.225108	2.59873	0.00935701	0.0851878	Alp10	0.500056	0.553563
FBgn0085479	129.81	0.512667	0.197325	2.59808	0.00937455	0.0852817	CG34450	0.357042	0.41306
FBgn0034786	1128.04	-0.285296	0.109867	-2.59674	0.00941134	0.0855504	CG13531	0.00319053	0.00781012
FBgn0038721	1171.44	-0.274892	0.105872	-2.59646	0.00941893	0.0855535	subdued	0.00170176	0.00452141
FBgn0263469	143.696	-0.496486	0.191316	-2.59512	0.00945586	0.0856485	snoRNA:SC35-b	0.321875	0.376856
FBgn0020440	1286.49	-0.283022	0.109032	-2.59576	0.00943812	0.0856485	Fak	0.00280899	0.0069834
FBgn0034937	155.585	0.570832	0.219972	2.59502	0.00945842	0.0856485	fzr2	0.47439	0.528773
FBgn0040823	743.471	-0.31119	0.119894	-2.59554	0.00944415	0.0856485	dpr6	0.0112019	0.0227982
FBgn0011739	3152.83	-0.232269	0.089588	-2.59263	0.00952438	0.0861796	wts	4.12804e-05	0.00018618
FBgn0039647	4589.96	-0.248456	0.0958456	-2.59225	0.00953498	0.0862094	jus	0.000223276	0.000778626
FBgn0031786	50.3941	0.671987	0.25936	2.59095	0.00957118	0.0864704	CG13989	0.63139	0.677335
FBgn0262858	94.7774	0.593566	0.229171	2.59006	0.00959598	0.0866281	MtnF	0.514973	0.567891
FBgn0046706	330.939	-0.387937	0.149813	-2.58947	0.00961244	0.0866441	Haspin	0.0942314	0.128764
FBgn0030008	527.717	-0.374983	0.144805	-2.58957	0.00960957	0.0866441	CG2129	0.073517	0.104553
FBgn0040283	785.969	-0.30103	0.11627	-2.58906	0.00962393	0.0866815	SMC1	0.00730306	0.015839
FBgn0051797	94.2393	0.648451	0.250494	2.58869	0.0096343	0.0866842	CG31797	0.600041	0.648304
FBgn0051415	97.3691	0.640771	0.247543	2.58852	0.00963892	0.0866842	CG31415	0.589185	0.638505
FBgn0035262	396.257	0.427661	0.165293	2.58729	0.00967339	0.0869279	CG18171	0.170636	0.214618
FBgn0085383	2034.93	-0.249812	0.0966034	-2.58595	0.00971109	0.0872002	CG34354	0.00026086	0.000891764
FBgn0039914	641.197	-0.323189	0.125036	-2.58477	0.00974426	0.0874316	mav	0.0181482	0.0339228
FBgn0039083	172.147	0.5016	0.194083	2.58446	0.00975314	0.0874447	CG10177	0.333772	0.389368
FBgn0032110	100.57	0.606588	0.234794	2.5835	0.00978046	0.0876231	CG3748	0.536693	0.588486
FBgn0034105	148.164	0.573342	0.221973	2.58294	0.00979634	0.0876269	CG7755	0.479124	0.533513
FBgn0035806	42.8261	-0.688794	0.266696	-2.5827	0.00980316	0.0876269	PGRP-SD	0.651483	0.696229
FBgn0267145	14.7302	0.725513	0.280872	2.58307	0.00979251	0.0876269	lncRNA:CR45585	0.691606	0.733591
FBgn0261627	52.2749	0.71086	0.27528	2.58231	0.00981403	0.0876577	CG42710	0.676288	0.719414
FBgn0028543	818.794	0.341685	0.132371	2.58126	0.00984404	0.0877317	NimB2	0.033043	0.0543527
FBgn0002673	176.147	0.496132	0.192226	2.58098	0.00985206	0.0877317	twe	0.321999	0.376939
FBgn0040814	31.0947	0.717091	0.277819	2.58115	0.00984722	0.0877317	CG14113	0.682818	0.725183
FBgn0040532	441.392	-0.332794	0.128937	-2.58106	0.00984962	0.0877317	CG8369	0.0252472	0.0438858
FBgn0003074	6045.33	-0.223825	0.0867356	-2.58054	0.00986451	0.08777	Pgi	1.56594e-05	8.16478e-05
FBgn0040207	412.433	-0.363708	0.140958	-2.58026	0.00987269	0.08777	kat80	0.0582488	0.0859484
FBgn0031155	35.8612	0.733582	0.284329	2.58005	0.00987868	0.08777	CG15446	0.699409	0.741002
FBgn0020767	3448.72	-0.257154	0.0997012	-2.57925	0.00990149	0.0877744	Spred	0.000504675	0.00158386
FBgn0036016	107.505	0.565632	0.219273	2.57958	0.00989201	0.0877744	CG3306	0.464875	0.519888
FBgn0038115	250.345	-0.405296	0.157131	-2.57934	0.00989882	0.0877744	CG7966	0.126432	0.166218
FBgn0264895	2668.85	-0.255539	0.0990963	-2.57869	0.00991764	0.0878516	RapGAP1	0.000443236	0.00141629
FBgn0001235	6609.49	-0.257418	0.0998412	-2.57828	0.00992949	0.0878905	hth	0.000517831	0.00162006
FBgn0035568	125.73	0.588121	0.228138	2.57792	0.00993973	0.0879152	CG18418	0.505522	0.558932
FBgn0051211	1241.56	-0.324369	0.12584	-2.57763	0.00994807	0.087923	CG31211	0.0191871	0.0354634
FBgn0031844	19.152	0.736142	0.285733	2.57633	0.00998559	0.0881886	CG13771	0.70163	0.742821
FBgn0037432	64.4308	0.688353	0.267274	2.57546	0.0100107	0.0883442	CG10298	0.65056	0.695495
FBgn0000286	2402.79	-0.253414	0.0984078	-2.57514	0.0100199	0.0883596	Cf2	0.000377029	0.00122769
FBgn0010504	271.564	0.525733	0.204198	2.57463	0.0100347	0.0884242	kermit	0.385886	0.442459
FBgn0267336	12096.4	-0.264292	0.102699	-2.57346	0.0100688	0.0886157	Glut4EF	0.000896837	0.00260396
FBgn0039349	814.053	-0.29166	0.113338	-2.57336	0.0100715	0.0886157	Ssadh	0.00482881	0.0111699
FBgn0032774	1463.74	-0.243586	0.0946986	-2.57223	0.0101046	0.0888077	CG17549	0.000156154	0.000574805
FBgn0033457	137.334	0.516301	0.200751	2.57184	0.0101159	0.0888077	Ntmt	0.366167	0.42252
FBgn0082954	253.658	-0.456838	0.177635	-2.57178	0.0101178	0.0888077	snoRNA:Psi28S-3571	0.235369	0.285936
FBgn0043791	242.51	0.540407	0.210145	2.57158	0.0101234	0.0888077	phu	0.416044	0.472128
FBgn0085337	40.26	0.712495	0.27713	2.57098	0.0101411	0.0888386	CG34308	0.677311	0.720372
FBgn0262010	66.9165	0.686228	0.266943	2.57069	0.0101495	0.0888386	CG42828	0.647787	0.692908
FBgn0040649	25.4946	0.735641	0.286137	2.57094	0.0101422	0.0888386	CG15461	0.700763	0.742169
FBgn0031337	50.4489	0.66437	0.258555	2.56955	0.0101831	0.0890661	CG14346	0.620625	0.667486
FBgn0034144	1825.47	0.62125	0.241843	2.56881	0.0102048	0.0890677	CG5089	0.559636	0.610239
FBgn0037577	13.7954	0.727608	0.283251	2.56877	0.0102059	0.0890677	CG7443	0.69273	0.734651
FBgn0039425	220.923	0.556016	0.216422	2.56913	0.0101955	0.0890677	Ald2	0.446799	0.502292
FBgn0038296	932.502	0.355858	0.138556	2.56832	0.0102192	0.0891174	Kpc1	0.0491132	0.0744144
FBgn0034276	258.82	-0.465052	0.181096	-2.56799	0.010229	0.0891374	Sardh	0.253942	0.305673
FBgn0029894	987.903	-0.280278	0.109174	-2.56724	0.0102511	0.0892636	CG14440	0.00262884	0.00659951
FBgn0085407	798.545	-0.28636	0.111619	-2.5655	0.0103027	0.0896198	Pvf3	0.00373434	0.0089609
FBgn0000451	60.6346	0.643296	0.250763	2.56535	0.0103072	0.0896198	ect	0.591973	0.641055
FBgn0037898	13.2044	-0.72062	0.281071	-2.56384	0.0103522	0.0899448	Dtd	0.685327	0.727389
FBgn0037464	431.83	0.475615	0.185582	2.56284	0.0103821	0.0901387	Mst84B	0.277859	0.33095
FBgn0039927	3396.5	-0.251168	0.0980492	-2.56165	0.0104177	0.0903809	CG11155	0.000331597	0.00109737
FBgn0010235	981.335	-0.292901	0.114445	-2.55932	0.0104878	0.0909224	Klc	0.00535559	0.012215
FBgn0034933	184.756	0.435053	0.17004	2.55854	0.0105114	0.0909933	CG3735	0.188994	0.235002
FBgn0263220	5754.48	-0.257941	0.100813	-2.55861	0.0105092	0.0909933	Hk	0.00058967	0.00181676
FBgn0086372	3439.19	-0.228766	0.0894683	-2.55695	0.0105595	0.0913425	lap	3.42748e-05	0.00015772
FBgn0266064	1385.76	-0.248894	0.0974778	-2.55334	0.0106696	0.0922278	GlyS	0.000282751	0.00095541
FBgn0264907	588.728	-0.298499	0.11694	-2.55259	0.0106926	0.0923585	CG44098	0.00714945	0.0155602
FBgn0035585	34.9226	0.70131	0.274787	2.5522	0.0107046	0.0923949	ATPsynCF6L	0.664002	0.707493
FBgn0051213	159.459	0.520169	0.204085	2.54878	0.01081	0.0932365	CG31213	0.375439	0.431909
FBgn0037626	84.3583	0.645773	0.253469	2.54774	0.0108422	0.0934455	CG8236	0.594802	0.643469
FBgn0262855	140.343	-0.514218	0.201923	-2.54661	0.0108775	0.0936583	CG43219	0.363036	0.419377
FBgn0040252	51.6697	0.676266	0.265573	2.54644	0.0108828	0.0936583	Ugt303A1	0.634501	0.680238
FBgn0034745	257.081	0.492908	0.193602	2.54598	0.0108972	0.0937143	CG4329	0.317221	0.372121
FBgn0029584	301.982	-0.405364	0.159246	-2.54553	0.0109113	0.0937669	br	0.129701	0.169928
FBgn0040732	371.32	-0.407918	0.160283	-2.54498	0.0109285	0.0937783	CG16926	0.134672	0.175408
FBgn0260388	290.608	-0.393357	0.154555	-2.5451	0.0109247	0.0937783	CG42514	0.107538	0.144338
FBgn0051949	67.8313	0.690322	0.271315	2.54436	0.0109479	0.0938766	CG31949	0.651113	0.695961
FBgn0051784	165.502	0.537479	0.211265	2.5441	0.010956	0.0938782	CG31784	0.411083	0.467577
FBgn0003339	692.886	-0.347378	0.1366	-2.54304	0.0109894	0.0939713	Scr	0.0409928	0.0643425
FBgn0039465	1914.17	-0.250021	0.0983007	-2.54343	0.010977	0.0939713	Tsp97E	0.000328028	0.00108765
FBgn0029657	50.3716	0.675244	0.265531	2.54299	0.0109908	0.0939713	CG12535	0.633073	0.678954
FBgn0058196	1042.92	-0.270878	0.106589	-2.54134	0.0110427	0.0943471	Maf1	0.00160595	0.00430958
FBgn0051451	15749	-0.251162	0.0988928	-2.53974	0.0110934	0.094661	lncRNA:CR31451	0.000368579	0.00120349
FBgn0029751	73.1631	0.616505	0.24275	2.53968	0.0110955	0.094661	CG17764	0.551693	0.602581
FBgn0034721	35.7633	0.690719	0.272116	2.53833	0.0111384	0.0949584	CG11298	0.65123	0.696022
FBgn0038938	1836.02	0.318612	0.125541	2.53792	0.0111514	0.0950002	CG7084	0.0169346	0.0320691
FBgn0033500	207.776	-0.422127	0.166362	-2.5374	0.011168	0.0950732	Csgalnact	0.16384	0.207465
FBgn0267033	11699.9	-0.219911	0.0867226	-2.5358	0.0112191	0.0954395	mamo	1.28017e-05	6.86914e-05
FBgn0035693	112.287	0.539123	0.212876	2.53257	0.011323	0.0962536	CG8219	0.414753	0.47098
FBgn0051157	38.3628	0.688405	0.271993	2.53097	0.0113748	0.0966245	CG31157	0.648144	0.693227
FBgn0264001	9323.38	-0.237847	0.0939891	-2.53057	0.0113876	0.0966634	bru3	0.000110747	0.000427824
FBgn0028880	62.7026	0.662217	0.261922	2.5283	0.0114617	0.0969965	CG15256	0.615985	0.663221
FBgn0034825	56.4187	0.689723	0.272774	2.52855	0.0114536	0.0969965	Gpdh2	0.649531	0.694584
FBgn0024728	1295.84	-0.285852	0.113044	-2.52869	0.011449	0.0969965	Slip1	0.00407278	0.00964351
FBgn0026199	1816.4	-0.25626	0.101365	-2.52811	0.0114679	0.0969965	myo	0.000591863	0.00182304
FBgn0040906	34.3814	0.696692	0.275513	2.52871	0.0114484	0.0969965	CG15579	0.657457	0.701407
FBgn0038683	825.609	0.285253	0.112851	2.52771	0.011481	0.0970373	CG11779	0.00395599	0.00941994
FBgn0086677	5282.04	-0.276052	0.10926	-2.52656	0.0115186	0.0972852	jeb	0.00234717	0.00598673
FBgn0030558	4945.55	-0.294422	0.11656	-2.52591	0.0115398	0.0973948	Tat	0.00634024	0.0141062
FBgn0027356	4020.04	-0.217213	0.0860649	-2.52383	0.0116085	0.0979043	Amph	9.64609e-06	5.39175e-05
FBgn0032090	44.8174	0.706962	0.280398	2.52128	0.0116929	0.0985458	CG9582	0.668253	0.711765
FBgn0038733	742.464	-0.311099	0.123488	-2.51927	0.0117599	0.0990399	CG11407	0.0132865	0.0262744
FBgn0034499	21.6907	0.720225	0.286113	2.51728	0.0118266	0.0995306	Cpr56F	0.681808	0.724371
FBgn0063494	126.826	-0.510658	0.202885	-2.51699	0.0118363	0.0995414	GstE6	0.357093	0.41306
FBgn0040496	74.2961	0.645639	0.256666	2.51548	0.011887	0.0998256	CG17104	0.593439	0.642289
FBgn0040519	577.142	0.678263	0.269614	2.51568	0.0118803	0.0998256	CG15219	0.635348	0.6809
FBgn0000404	90.0287	0.574534	0.22877	2.51141	0.0120251	0.100913	CycA	0.48182	0.536043
FBgn0264606	4523.82	-0.266724	0.106248	-2.51038	0.0120601	0.10094	Fife	0.00137115	0.00376165
FBgn0015575	1469.29	-0.264885	0.105515	-2.5104	0.0120596	0.10094	alpha-Est7	0.00120879	0.00337111
FBgn0038269	831.112	0.29954	0.119303	2.51075	0.0120474	0.10094	Rrp6	0.00836895	0.0178294
FBgn0039343	110.601	0.559735	0.222974	2.51031	0.0120625	0.10094	CG5111	0.454959	0.510492
FBgn0039030	75.7374	0.576581	0.229721	2.50992	0.0120758	0.10098	CG6660	0.485448	0.53957
FBgn0040345	49.0733	0.678372	0.270316	2.50955	0.0120885	0.101014	CG3708	0.635162	0.680761
FBgn0029812	29.0071	0.713809	0.284542	2.50862	0.0121202	0.101208	Prosbeta2R1	0.674661	0.717942
FBgn0053978	1707.84	-0.275235	0.109735	-2.50819	0.0121352	0.101261	CG33978	0.00238246	0.00606753
FBgn0028397	5505.06	-0.24362	0.0971586	-2.50744	0.0121608	0.101403	Tob	0.000221327	0.000773347
FBgn0262095	94.3226	0.622989	0.248571	2.50628	0.0122008	0.101665	CR42848	0.560793	0.611444
FBgn0032889	756.832	-0.273009	0.108994	-2.50481	0.0122517	0.102017	CG9331	0.00210413	0.0054326
FBgn0034261	1814.28	-0.262875	0.105124	-2.50062	0.0123976	0.103087	HPS4	0.00109241	0.00308745
FBgn0036213	6665.5	0.255135	0.102019	2.50085	0.0123896	0.103087	RpL10Ab	0.000612502	0.00188023
FBgn0262036	69.6923	0.618829	0.247606	2.49925	0.0124455	0.103412	CG42847	0.554397	0.605086
FBgn0040308	159.032	0.496544	0.198739	2.49847	0.0124731	0.103568	Jafrac2	0.328197	0.383243
FBgn0017590	1040.68	-0.261134	0.10454	-2.49793	0.0124919	0.103651	klg	0.000975279	0.00279797
FBgn0051740	709.395	0.652874	0.261498	2.49667	0.0125367	0.103877	CG31740	0.602453	0.650493
FBgn0039085	67.9859	0.634434	0.254103	2.49676	0.0125334	0.103877	Ugt303B3	0.577183	0.627054
FBgn0259701	90.3624	0.568244	0.227651	2.49612	0.0125561	0.103964	CG42355	0.470728	0.525238
FBgn0037849	333.388	-0.378108	0.151502	-2.49573	0.01257	0.104006	CG4596	0.0860701	0.119495
FBgn0030386	69.257	0.614778	0.246358	2.49546	0.0125793	0.104011	CG2574	0.548164	0.599448
FBgn0032065	51.2431	0.673524	0.270037	2.4942	0.0126242	0.104309	CG12438	0.62853	0.674819
FBgn0034335	420.272	-0.325787	0.130635	-2.49388	0.0126354	0.104328	GstE1	0.0236294	0.041657
FBgn0034275	285.111	0.42052	0.168742	2.49209	0.0126994	0.104612	CG5002	0.164899	0.208341
FBgn0034753	923.07	0.267225	0.107234	2.49197	0.0127035	0.104612	CG2852	0.0015232	0.00412032
FBgn0035321	556.934	0.340484	0.136635	2.49193	0.0127052	0.104612	CG1275	0.0367849	0.0589859
FBgn0040056	1781.63	-0.243997	0.0978986	-2.49234	0.0126905	0.104612	CG17698	0.000248056	0.000854182
FBgn0020399	150.002	0.540434	0.217002	2.49046	0.0127577	0.10497	Mst89B	0.418709	0.474787
FBgn0085432	9160.96	-0.24317	0.0976684	-2.48975	0.0127833	0.105108	pan	0.000233044	0.00080958
FBgn0036286	539.849	0.321296	0.129088	2.48897	0.0128114	0.105266	CG10616	0.0205493	0.0374414
FBgn0004580	1749.15	-0.253632	0.101988	-2.48687	0.0128872	0.105815	Cbp53E	0.000579654	0.00179058
FBgn0022959	5265.39	0.243888	0.098126	2.48545	0.0129386	0.106163	yps	0.000254585	0.000873604
FBgn0002174	776.108	0.286377	0.115249	2.48486	0.0129601	0.106208	CG5504	0.00478782	0.0110873
FBgn0263461	65.5853	-0.590153	0.237504	-2.48481	0.012962	0.106208	snoRNA:CG32479-a	0.508719	0.561834
FBgn0010651	876.62	0.281989	0.113543	2.48353	0.0130087	0.106428	MFS14	0.00381125	0.00912502
FBgn0034658	141.147	0.524543	0.211226	2.48333	0.013016	0.106428	Grx1t	0.387424	0.444132
FBgn0262869	3237.08	-0.283991	0.114355	-2.48341	0.013013	0.106428	Gfrl	0.00424532	0.0099859
FBgn0038909	193.871	0.545142	0.219595	2.48249	0.0130467	0.106606	CG6569	0.428052	0.483938
FBgn0031835	3412.92	-0.259684	0.104663	-2.48115	0.0130959	0.106847	CG11319	0.000942194	0.002718
FBgn0041180	4844.9	-0.221598	0.0893176	-2.48101	0.013101	0.106847	Tep4	2.36857e-05	0.000115053
FBgn0029661	92.6825	0.581261	0.23429	2.48095	0.0131034	0.106847	CG16781	0.493697	0.547397
FBgn0035999	228.108	0.402027	0.162073	2.48053	0.0131186	0.106848	CG3552	0.129507	0.169712
FBgn0027795	272.091	0.501985	0.202377	2.48045	0.0131217	0.106848	CG14785	0.340898	0.396544
FBgn0029946	91.6497	0.570406	0.230064	2.47934	0.0131625	0.107107	CG15034	0.474775	0.529153
FBgn0002567	5413.77	-0.220363	0.0889066	-2.47859	0.0131903	0.107259	Rab32	2.05749e-05	0.000102475
FBgn0002948	206.506	-0.45185	0.182336	-2.47812	0.0132076	0.107326	nod	0.232682	0.28299
FBgn0013813	646.684	0.322799	0.130316	2.47705	0.0132474	0.107575	Dhc98D	0.0221232	0.0396355
FBgn0052847	71.1438	0.630926	0.254838	2.4758	0.0132939	0.10773	CG32847	0.571566	0.621697
FBgn0037169	50.1337	0.646685	0.261199	2.47583	0.0132927	0.10773	CG11404	0.593402	0.642289
FBgn0039936	3748.97	-0.252452	0.101949	-2.47626	0.0132767	0.10773	Gyf	0.000554065	0.00171829
FBgn0051343	676.877	0.673088	0.271921	2.47531	0.0133121	0.107804	CG31343	0.627063	0.673427
FBgn0024807	4605.61	-0.244912	0.0989837	-2.47426	0.0133511	0.108045	DIP1	0.000295817	0.000995113
FBgn0039727	4074.35	0.267012	0.107958	2.47329	0.0133874	0.108264	Vps13B	0.00161412	0.00432854
FBgn0036654	36.3448	0.671893	0.271735	2.47261	0.0134131	0.108398	CG9692	0.625482	0.671974
FBgn0262731	168.254	-0.438282	0.17729	-2.47211	0.0134317	0.108474	CG33941	0.20402	0.251511
FBgn0036659	151.806	-0.46877	0.189663	-2.4716	0.013451	0.108556	CG9701	0.270062	0.322706
FBgn0005640	2524.33	-0.240022	0.0971226	-2.47133	0.0134612	0.108564	Eip63E	0.000191447	0.000684219
FBgn0031267	119.284	0.486616	0.196977	2.47042	0.0134954	0.108765	Ipk2	0.308792	0.363426
FBgn0025628	693.576	0.289487	0.117376	2.46631	0.0136512	0.109814	CG4199	0.00591239	0.0132972
FBgn0030530	533.086	-0.306167	0.124124	-2.46661	0.0136398	0.109814	jub	0.0123489	0.0247678
FBgn0004956	28.3977	0.702683	0.284919	2.46626	0.0136534	0.109814	upd1	0.66026	0.703888
FBgn0035567	91.8158	0.569193	0.230858	2.46556	0.01368	0.109881	CG7514	0.472771	0.527318
FBgn0266227	1376.64	-0.269021	0.109112	-2.46555	0.0136805	0.109881	lncRNA:CR44922	0.00189235	0.00495194
FBgn0263995	15812.9	-0.221719	0.089954	-2.46481	0.0137088	0.110034	cpo	2.69428e-05	0.000128701
FBgn0038102	33.8843	0.679704	0.275917	2.46344	0.0137612	0.11038	CG14383	0.63434	0.68019
FBgn0261243	2293.84	0.27143	0.110212	2.46279	0.0137859	0.110427	Psa	0.00222186	0.00570823
FBgn0051992	7049.9	-0.223524	0.090755	-2.46294	0.0137804	0.110427	gw	3.40868e-05	0.000157039
FBgn0039029	44.9184	0.6587	0.267515	2.46229	0.0138053	0.110508	CG4704	0.608587	0.656635
FBgn0027550	560.51	-0.307772	0.125157	-2.45909	0.0139291	0.111348	CG6495	0.013389	0.0264595
FBgn0026401	5024.76	-0.239942	0.0975728	-2.4591	0.0139285	0.111348	Nipped-B	0.00020309	0.000717352
FBgn0002772	1163	0.312497	0.127121	2.45826	0.013961	0.111527	Mlc1	0.0160424	0.0306801
FBgn0003961	57.7489	0.660837	0.268885	2.45769	0.0139834	0.11163	Uro	0.611098	0.658922
FBgn0051660	1765.84	-0.251994	0.102599	-2.4561	0.0140456	0.11194	smog	0.000586585	0.001809
FBgn0033244	2350.48	-0.256202	0.104345	-2.45533	0.0140755	0.11194	CG8726	0.000814411	0.00239889
FBgn0263397	10418.7	-0.236216	0.0961948	-2.4556	0.014065	0.11194	Ih	0.000144245	0.000538325
FBgn0267002	18194.5	-0.240402	0.0978956	-2.45569	0.0140613	0.11194	unc-104	0.000216035	0.000756732
FBgn0085453	201.253	-0.420215	0.171184	-2.45475	0.0140981	0.11194	Mthfs	0.167924	0.211682
FBgn0037140	208.922	0.441017	0.179631	2.45512	0.0140837	0.11194	SLC22A	0.211468	0.259392
FBgn0029658	61.2923	0.652834	0.265926	2.45495	0.0140905	0.11194	CG14269	0.600726	0.648925
FBgn0020378	174.464	-0.516915	0.210496	-2.4557	0.0140611	0.11194	Sp1	0.373245	0.429846
FBgn0034135	1561.71	-0.242457	0.09879	-2.45426	0.0141174	0.112018	Syn2	0.000263143	0.000898267
FBgn0002899	33.4463	-0.68808	0.280466	-2.45334	0.0141536	0.112154	mus301	0.643438	0.688755
FBgn0083001	265.093	-0.412331	0.168068	-2.45336	0.0141529	0.112154	snoRNA:Psi28S-1192a	0.152174	0.194551
FBgn0265673	19.9941	0.701041	0.285818	2.45275	0.0141769	0.112264	lncRNA:CR44480	0.657676	0.701513
FBgn0259712	24.809	-0.696696	0.28413	-2.45203	0.0142052	0.112413	CG42366	0.652932	0.697399
FBgn0085190	36.6152	0.690814	0.281784	2.45157	0.0142233	0.11248	CG34161	0.646411	0.691686
FBgn0031826	114.354	0.531297	0.216855	2.45001	0.0142851	0.112855	CG9550	0.402271	0.458571
FBgn0029768	733.077	-0.29975	0.122352	-2.44989	0.0142898	0.112855	SPR	0.00987479	0.0205185
FBgn0031220	900.041	-0.258343	0.105488	-2.44902	0.0143247	0.113055	CG4822	0.000979897	0.00280917
FBgn0037365	64.5493	0.591632	0.241689	2.44791	0.0143689	0.113328	CG2104	0.511007	0.56415
FBgn0032773	894.483	0.265003	0.108277	2.44745	0.0143869	0.113342	fon	0.00156326	0.00421227
FBgn0033953	1756.83	0.576063	0.23538	2.44738	0.0143899	0.113342	CG12861	0.484921	0.539136
FBgn0265634	32.7875	-0.677816	0.276985	-2.44712	0.0144001	0.113347	lncRNA:CR44441	0.631274	0.677272
FBgn0011244	620.351	0.660195	0.269812	2.44688	0.0144101	0.113349	Hsp60B	0.609814	0.657718
FBgn0261581	33.5068	0.698546	0.285546	2.44635	0.0144312	0.113373	CG42691	0.654602	0.698803
FBgn0038986	101.199	0.579196	0.236762	2.44632	0.0144323	0.113373	sit	0.490285	0.544227
FBgn0040812	44.0279	0.664577	0.271817	2.44494	0.0144876	0.113656	CG8750	0.6152	0.66271
FBgn0016696	2405.87	-0.231911	0.094853	-2.44495	0.0144873	0.113656	Pitslre	9.87898e-05	0.000388635
FBgn0038467	437.024	-0.357813	0.146366	-2.44465	0.0144993	0.113665	AdSL	0.0603394	0.0885128
FBgn0051115	64.1741	0.593337	0.24273	2.44443	0.014508	0.113665	CG31115	0.513762	0.566767
FBgn0038357	57.9634	0.65887	0.26967	2.44325	0.0145556	0.113963	CG5623	0.607984	0.656044
FBgn0087007	2585.92	-0.241824	0.0989896	-2.44292	0.0145688	0.11399	bbg	0.000263729	0.000899764
FBgn0038209	34.1176	0.669724	0.274236	2.44214	0.0146004	0.114162	CG9722	0.62137	0.668104
FBgn0000008	1054.04	-0.265635	0.108862	-2.44011	0.014683	0.114465	a	0.00167683	0.00446262
FBgn0035245	290.11	-0.373751	0.153147	-2.44047	0.0146683	0.114465	GC	0.0839264	0.117208
FBgn0052117	52.2961	0.668893	0.27413	2.44006	0.0146848	0.114465	CG32117	0.620263	0.667158
FBgn0036997	280.434	-0.365684	0.149862	-2.44014	0.0146817	0.114465	CG5955	0.0717059	0.102435
FBgn0262509	2829.96	-0.285464	0.116994	-2.43999	0.0146877	0.114465	nrm	0.00523437	0.011964
FBgn0261597	9191.58	0.26811	0.109949	2.43849	0.0147489	0.114714	RpS26	0.00197707	0.00514283
FBgn0029167	3450.51	-0.224512	0.0920646	-2.43864	0.0147428	0.114714	Hml	4.51662e-05	0.000200636
FBgn0039228	50.5667	0.652675	0.267644	2.4386	0.0147444	0.114714	CG6980	0.599863	0.648171
FBgn0030634	557.652	-0.294081	0.120723	-2.436	0.0148505	0.115429	CG9164	0.00798723	0.0171306
FBgn0046793	134.176	0.54112	0.22218	2.4355	0.0148712	0.115514	CG32236	0.421786	0.477679
FBgn0038944	108.904	0.562409	0.230984	2.43484	0.0148983	0.115648	CG5388	0.461109	0.516312
FBgn0086604	926.33	-0.257848	0.105935	-2.43402	0.014932	0.115833	side-VIII	0.00100795	0.0028777
FBgn0001301	1615.91	0.232094	0.0953844	2.43325	0.0149642	0.115854	kel	0.000108038	0.00041956
FBgn0003162	1387.81	-0.266892	0.109679	-2.43339	0.0149583	0.115854	Pu	0.00186582	0.00488795
FBgn0011747	5878.64	-0.21018	0.0863709	-2.43346	0.0149552	0.115854	Ank	7.14961e-06	4.22246e-05
FBgn0261853	22.6019	0.693046	0.28503	2.43149	0.015037	0.116266	CG42782	0.647731	0.692908
FBgn0250824	122.725	0.556044	0.228678	2.43156	0.0150339	0.116266	CG33655	0.449684	0.50515
FBgn0050268	81.4851	0.612472	0.252166	2.42884	0.0151472	0.117041	CG30268	0.543436	0.594785
FBgn0038391	112.834	0.551216	0.226969	2.4286	0.0151574	0.117043	GATAe	0.440901	0.496845
FBgn0034175	149.401	0.565075	0.232708	2.42826	0.0151714	0.117075	ste24b	0.465948	0.520693
FBgn0029700	59.7862	0.652093	0.268576	2.42796	0.015184	0.117095	CG15576	0.598686	0.647077
FBgn0037138	2930.41	-0.235698	0.0971036	-2.42729	0.0152122	0.117236	P5CDh1	0.000161066	0.000590124
FBgn0037697	823.944	-0.281335	0.116004	-2.42522	0.0152991	0.117829	GstZ2	0.00443035	0.0103571
FBgn0029705	201.735	0.512369	0.211311	2.42472	0.0153203	0.117915	CG12693	0.365596	0.421902
FBgn0042119	418.531	-0.32238	0.132999	-2.42393	0.0153535	0.118094	Cpr65Au	0.0241728	0.0424443
FBgn0262169	557.048	-0.301337	0.124485	-2.42067	0.0154921	0.119083	magu	0.0113519	0.0230476
FBgn0040996	57.4799	0.66726	0.275698	2.42026	0.0155095	0.119113	CG12617	0.617341	0.664257
FBgn0050222	111.684	0.515963	0.213199	2.4201	0.0155163	0.119113	CG30222	0.373106	0.42977
FBgn0265648	50.7778	0.655023	0.270765	2.41916	0.0155563	0.119343	lncRNA:CR44455	0.602087	0.650216
FBgn0023129	979.122	-0.262484	0.108544	-2.41824	0.0155958	0.119568	aay	0.00148436	0.00403038
FBgn0034468	14.4602	-0.679915	0.281339	-2.41671	0.0156616	0.119995	Obp56a	0.63213	0.678067
FBgn0027548	844.418	-0.282623	0.117009	-2.41539	0.0157183	0.120257	nito	0.00488449	0.0112713
FBgn0004168	969.748	-0.294249	0.121832	-2.4152	0.0157265	0.120257	5-HT1A	0.00851223	0.0180921
FBgn0037283	102.877	0.575792	0.238371	2.41553	0.0157125	0.120257	CG14658	0.484656	0.538892
FBgn0029506	1154.93	0.278982	0.115536	2.41468	0.0157491	0.120352	Tsp42Ee	0.00404425	0.00959137
FBgn0037739	72.8126	-0.560738	0.23231	-2.41375	0.0157894	0.120582	CG12948	0.458475	0.513688
FBgn0050093	74.554	0.593822	0.24608	2.41313	0.0158164	0.12071	COX6AL	0.51436	0.567373
FBgn0036790	97.2027	-0.552954	0.229252	-2.41199	0.0158656	0.120929	AstC-R1	0.444479	0.500212
FBgn0051007	199.953	0.519369	0.215313	2.41216	0.0158583	0.120929	CG31007	0.380319	0.436841
FBgn0085233	26.0952	0.689413	0.286065	2.40999	0.015953	0.12136	CG34204	0.642492	0.687993
FBgn0035176	13.1316	0.676029	0.280496	2.41012	0.0159472	0.12136	mat	0.627282	0.673602
FBgn0037829	55.4721	0.638039	0.264735	2.41011	0.0159477	0.12136	CG14691	0.579452	0.628997
FBgn0037176	54.4377	0.64217	0.266564	2.40907	0.0159933	0.121588	CG14456	0.584965	0.634281
FBgn0042178	237.01	0.430763	0.178844	2.40859	0.0160141	0.121668	Apl	0.194289	0.240799
FBgn0033287	2148.09	0.566357	0.235387	2.40606	0.0161254	0.122435	CG8701	0.468499	0.523195
FBgn0037750	143.585	0.44778	0.186137	2.40566	0.0161435	0.122493	Whamy	0.230562	0.28074
FBgn0037307	39.1059	0.673075	0.280013	2.40373	0.0162288	0.123061	Tim17a2	0.623495	0.670023
FBgn0029507	210.579	0.43705	0.181881	2.40295	0.0162633	0.123244	Tsp42Ed	0.208041	0.255835
FBgn0032600	2825.04	-0.244034	0.101569	-2.40265	0.0162768	0.123267	BuGZ	0.000394508	0.0012765
FBgn0016694	11028.6	-0.207937	0.0865929	-2.40131	0.0163364	0.123623	Pdp1	6.68372e-06	4.00751e-05
FBgn0052712	15.9114	0.672168	0.279939	2.40113	0.0163448	0.123623	CG32712	0.622296	0.668917
FBgn0266635	43.7334	0.649039	0.270569	2.39879	0.0164494	0.124334	asRNA:CR45142	0.593602	0.642406
FBgn0265269	126.155	0.565849	0.236026	2.39741	0.0165116	0.124692	CG15425	0.467729	0.522386
FBgn0085385	1231.18	-0.278676	0.116247	-2.39727	0.0165178	0.124692	bma	0.00420955	0.00991759
FBgn0030087	5267.59	-0.1979	0.0825803	-2.39645	0.0165547	0.124891	CG7766	1.38549e-06	1.10572e-05
FBgn0265182	3081.43	-0.265409	0.110797	-2.39546	0.0165995	0.125149	CG44247	0.00196236	0.00511292
FBgn0038448	42.802	0.6639	0.27723	2.39476	0.0166313	0.125308	CG12783	0.612076	0.659796
FBgn0259822	3304.73	-0.248354	0.103718	-2.3945	0.0166428	0.125315	Ca-beta	0.000586416	0.001809
FBgn0034063	315.786	-0.371473	0.155151	-2.39427	0.0166534	0.125315	CG8389	0.0844083	0.117756
FBgn0037388	92.2002	0.565645	0.236467	2.39207	0.0167539	0.12599	CG14676	0.467446	0.522119
FBgn0037172	32.6875	0.678553	0.283742	2.39144	0.0167823	0.126044	ND-B14.5AL	0.629241	0.675404
FBgn0037455	88.1127	0.576227	0.240937	2.39162	0.0167744	0.126044	CG2336	0.48554	0.539621
FBgn0063261	53.9907	0.612535	0.256175	2.39108	0.0167988	0.126087	CG31275	0.542856	0.594415
FBgn0032075	317.502	0.421103	0.176219	2.38965	0.0168644	0.126419	Tsp29Fb	0.176221	0.220703
FBgn0250843	199.481	-0.401462	0.167992	-2.38976	0.0168594	0.126419	Prosalpha6	0.137347	0.178145
FBgn0039911	779.4	-0.268553	0.112416	-2.38893	0.0168977	0.126588	CG1909	0.00244162	0.00619412
FBgn0083048	81.0494	-0.536854	0.224792	-2.38823	0.0169299	0.126749	snoRNA:Psi18S-1377d	0.415268	0.47152
FBgn0039368	38.0479	0.668019	0.27992	2.38646	0.0170114	0.127278	CG17196	0.616658	0.663764
FBgn0037409	84.5791	-0.544623	0.228287	-2.38569	0.0170469	0.127463	Osi24	0.42987	0.485808
FBgn0259785	1588.02	-0.265806	0.11143	-2.3854	0.0170604	0.127483	pzg	0.00209042	0.00540312
FBgn0033423	64.6242	0.61861	0.259491	2.38393	0.0171288	0.12784	Alp6	0.551585	0.602518
FBgn0062517	108.646	0.541517	0.227155	2.38391	0.0171299	0.12784	CG16984	0.424162	0.480231
FBgn0032376	31.7392	0.672643	0.282208	2.3835	0.0171487	0.1279	Tsp33B	0.621984	0.668643
FBgn0035799	58.8607	0.613033	0.257252	2.38301	0.0171717	0.127991	CG14838	0.543446	0.594785
FBgn0000546	3713.25	-0.240674	0.101113	-2.38024	0.0173013	0.128389	EcR	0.000330853	0.00109609
FBgn0034187	140.946	-0.515429	0.216482	-2.38093	0.0172689	0.128389	Mov10	0.374031	0.430562
FBgn0083058	168.196	-0.453984	0.190719	-2.38039	0.0172944	0.128389	snoRNA:Psi18S-1086	0.246116	0.297346
FBgn0052192	363.839	0.651381	0.27351	2.38156	0.0172395	0.128389	CG32192	0.595934	0.644575
FBgn0024804	449.247	-0.369822	0.155332	-2.38084	0.0172731	0.128389	Dbp80	0.0830205	0.116164
FBgn0010113	6121.41	-0.225846	0.0948582	-2.38088	0.0172715	0.128389	hdc	7.6599e-05	0.000313793
FBgn0023531	5102.73	-0.256971	0.10796	-2.38025	0.0173008	0.128389	CG32809	0.0011904	0.00332612
FBgn0013576	15928.8	-0.204488	0.0859823	-2.37826	0.0173948	0.129001	mtd	4.82133e-06	3.05549e-05
FBgn0086698	368.101	-0.322058	0.135487	-2.37704	0.0174521	0.129345	frtz	0.0261632	0.0451058
FBgn0039955	1235.67	-0.237728	0.100106	-2.37477	0.0175598	0.12998	CG41099	0.000261516	0.00089323
FBgn0030306	161.05	0.463599	0.195209	2.37489	0.0175542	0.12998	Spase25	0.267066	0.319612
FBgn0000346	1568.14	-0.265221	0.111711	-2.37417	0.0175885	0.130111	comt	0.00210339	0.00543188
FBgn0032291	104.233	0.563082	0.237348	2.37239	0.0176736	0.130495	CG17118	0.463275	0.518492
FBgn0262896	16.0555	0.655023	0.276101	2.3724	0.0176728	0.130495	CG43251	0.600156	0.648368
FBgn0013679	1459.86	0.576265	0.242893	2.3725	0.017668	0.130495	mt:ND1	0.485717	0.539717
FBgn0030852	60.9165	0.633281	0.267059	2.37132	0.0177247	0.13079	corolla	0.571789	0.621881
FBgn0262814	11.8789	0.652437	0.275361	2.36939	0.0178173	0.131375	CG43185	0.596788	0.645262
FBgn0037229	183.847	-0.412819	0.174244	-2.36921	0.0178263	0.131375	flip	0.161589	0.204967
FBgn0037878	185.083	0.427211	0.180383	2.36835	0.0178678	0.131599	CG6693	0.190913	0.237179
FBgn0026869	9150.42	-0.221796	0.0936732	-2.36777	0.0178959	0.131724	Tdg	5.28877e-05	0.00022907
FBgn0266851	42.0427	-0.637795	0.269541	-2.36623	0.0179704	0.132147	lncRNA:CR45312	0.577698	0.62744
FBgn0038445	128.434	0.495583	0.20945	2.36612	0.0179758	0.132147	CG14891	0.334787	0.390397
FBgn0027054	275.61	0.362795	0.153349	2.36582	0.0179902	0.132171	CSN4	0.0737002	0.104726
FBgn0039682	2310.89	-0.215243	0.091074	-2.36338	0.0181089	0.13296	Obp99c	2.45836e-05	0.000118827
FBgn0034968	5753.65	0.231297	0.0979401	2.36162	0.0181953	0.133428	RpL12	0.000152489	0.000563777
FBgn0039938	1372.87	-0.262747	0.111254	-2.36168	0.0181925	0.133428	Sox102F	0.00188853	0.00494415
FBgn0263780	1095.19	-0.270696	0.114664	-2.36077	0.0182372	0.133622	CG17684	0.00306495	0.00754498
FBgn0016715	153.442	-0.443039	0.187715	-2.36016	0.018267	0.133622	Reg-2	0.224807	0.274386
FBgn0052432	2261.04	-0.255741	0.108343	-2.36047	0.0182519	0.133622	CG32432	0.00118805	0.00332191
FBgn0031082	34.356	0.668814	0.283375	2.36018	0.0182663	0.133622	CG17003	0.616348	0.663491
FBgn0037174	26.7933	0.668073	0.283115	2.35972	0.0182885	0.133697	CG14457	0.615452	0.662889
FBgn0051988	610.058	0.59849	0.253872	2.35745	0.0184012	0.134437	CG31988	0.521248	0.573768
FBgn0053301	67.7727	0.581549	0.24671	2.35721	0.0184127	0.134438	CG33301	0.49448	0.548007
FBgn0000229	726.428	-0.286985	0.121781	-2.35657	0.0184447	0.134505	bsk	0.007206	0.0156601
FBgn0032431	56.3425	0.615825	0.261307	2.3567	0.0184379	0.134505	CG5435	0.547008	0.59824
FBgn0019968	11048	-0.264654	0.112349	-2.35564	0.0184909	0.134752	Khc-73	0.002179	0.00561116
FBgn0266197	21.524	-0.673139	0.285782	-2.35543	0.0185015	0.134752	asRNA:CR44892	0.621166	0.667946
FBgn0030905	25.7352	0.668659	0.28396	2.35476	0.0185345	0.13491	CG15059	0.615907	0.663198
FBgn0002521	999.671	-0.263035	0.111728	-2.35425	0.0185599	0.134955	pho	0.00197985	0.00514892
FBgn0086368	33.2606	0.661752	0.281097	2.35418	0.0185636	0.134955	tw	0.607642	0.655795
FBgn0034396	543.971	-0.321801	0.136764	-2.35297	0.0186243	0.135247	CG15097	0.0271648	0.046459
FBgn0030897	3046.29	-0.239576	0.101821	-2.35292	0.0186267	0.135247	Frq1	0.000346782	0.00114184
FBgn0034914	870.092	0.284697	0.121041	2.35208	0.018669	0.135314	CG5554	0.00655638	0.0145104
FBgn0027554	907.615	0.329459	0.140073	2.35205	0.0186703	0.135314	CG8042	0.034071	0.0556248
FBgn0264563	48.579	0.642307	0.27308	2.35209	0.0186684	0.135314	CG43935	0.583163	0.632444
FBgn0033775	194.946	-0.413402	0.175816	-2.35133	0.0187064	0.135492	Cyp9h1	0.164584	0.208004
FBgn0030955	44.9461	0.651148	0.27709	2.34995	0.018776	0.135913	CG6891	0.594393	0.643085
FBgn0037835	300.335	-0.339442	0.144563	-2.34806	0.0188715	0.136521	CG14687	0.0447193	0.0688358
FBgn0031332	87.422	0.536308	0.228464	2.34745	0.0189024	0.13666	CG5556	0.415678	0.471813
FBgn0032268	62.5781	0.628595	0.267809	2.34717	0.0189165	0.136678	CG6138	0.56471	0.615147
FBgn0033368	906.844	-0.288893	0.1231	-2.34681	0.0189347	0.136726	CG13743	0.00808389	0.0173128
FBgn0033819	295.672	0.492216	0.20987	2.34534	0.0190096	0.137183	CG4714	0.329273	0.384385
FBgn0261244	2109.37	-0.232449	0.0991971	-2.34331	0.0191137	0.13785	inaE	0.000189952	0.0006797
FBgn0050324	236.455	0.508097	0.216908	2.34245	0.0191574	0.138081	CG30324	0.361531	0.417783
FBgn0037463	123.221	0.586477	0.250425	2.34193	0.0191844	0.138191	djl	0.502412	0.555859
FBgn0003145	91.4877	0.570258	0.243621	2.34076	0.0192446	0.13854	prd	0.475935	0.530246
FBgn0032372	114.044	0.562439	0.240309	2.34048	0.0192588	0.138557	CG4988	0.462662	0.517855
FBgn0038458	25.2227	0.669154	0.285978	2.33988	0.0192901	0.138698	VhaM9.7-d	0.615773	0.663175
FBgn0031108	123.419	0.536996	0.22952	2.33965	0.019302	0.1387	CG15459	0.41723	0.473245
FBgn0082923	226.6	-0.424991	0.181668	-2.33939	0.0193154	0.138711	snoRNA:Or-aca3	0.189275	0.235301
FBgn0037579	64.568	0.617257	0.26403	2.33783	0.019396	0.139205	COX7AL	0.548675	0.599839
FBgn0031865	302.932	0.369495	0.158147	2.3364	0.0194703	0.139653	Nha1	0.0865274	0.119989
FBgn0263598	3530.99	0.235994	0.101049	2.33544	0.0195206	0.139865	Vha68-2	0.000276736	0.000938688
FBgn0041721	108.034	-0.516638	0.221244	-2.33516	0.0195353	0.139865	snRNA:U12	0.378729	0.435227
FBgn0005427	1281.22	-0.254948	0.109178	-2.33516	0.0195352	0.139865	ewg	0.00125256	0.00347267
FBgn0037581	51.099	0.626238	0.268296	2.33413	0.0195888	0.140162	CG7352	0.561133	0.611759
FBgn0261552	44869.5	-0.225836	0.0967727	-2.33368	0.0196125	0.140162	ps	0.000103209	0.000403463
FBgn0037831	700.586	-0.265699	0.113852	-2.33372	0.0196104	0.140162	Cap-H2	0.00252217	0.00637515
FBgn0033369	73.3762	0.57224	0.245333	2.3325	0.0196742	0.140348	CG8197	0.47932	0.533664
FBgn0037170	70.1684	0.566917	0.243016	2.33284	0.0196565	0.140348	Trxr-2	0.470402	0.524974
FBgn0038569	496.416	0.291181	0.124827	2.33267	0.0196654	0.140348	CG7218	0.00929888	0.0194763
FBgn0015625	100.776	0.516326	0.221436	2.33172	0.0197154	0.140557	CycB3	0.378295	0.434813
FBgn0039864	136.017	-0.44567	0.19121	-2.33079	0.0197644	0.140822	CG11550	0.23316	0.283494
FBgn0039816	470.692	-0.29697	0.12746	-2.32991	0.0198109	0.141067	CG11317	0.011927	0.0240498
FBgn0032640	366.623	0.323184	0.13876	2.32909	0.0198544	0.141292	Sgt	0.0296096	0.0497813
FBgn0250819	606.876	-0.342902	0.147341	-2.32727	0.0199508	0.141892	CG33521	0.0502056	0.075826
FBgn0031757	105.84	0.57085	0.245341	2.32676	0.0199779	0.141957	Ucp4C	0.477064	0.531353
FBgn0050296	2102.16	-0.245094	0.105342	-2.32665	0.019984	0.141957	RIC-3	0.000626949	0.0019166
FBgn0034724	243.623	-0.373173	0.160425	-2.32615	0.0200105	0.14206	babos	0.0933872	0.127907
FBgn0030400	2947.95	-0.239227	0.102905	-2.32474	0.0200858	0.142423	Pits	0.000390035	0.00126376
FBgn0030661	37.7992	0.638691	0.274733	2.32477	0.0200843	0.142423	Alp11	0.577525	0.62731
FBgn0034674	376.135	-0.310303	0.133578	-2.32301	0.0201789	0.142997	CG9304	0.0198832	0.0365268
FBgn0263036	96.7221	0.548225	0.236047	2.32252	0.0202047	0.143095	CG43331	0.43816	0.494276
FBgn0028704	20428.5	-0.237215	0.102171	-2.32175	0.0202461	0.143216	Nckx30C	0.000332528	0.00109948
FBgn0037375	761.572	0.306485	0.131993	2.32197	0.0202344	0.143216	kat-60L1	0.0174384	0.0328242
FBgn0031335	91.7166	0.589623	0.254157	2.31991	0.0203455	0.143833	CG5565	0.507315	0.560704
FBgn0024987	2375.26	-0.235272	0.101478	-2.31845	0.020425	0.144308	ssx	0.00028452	0.000960671
FBgn0041605	42597.1	-0.223661	0.0965201	-2.31725	0.0204904	0.144683	cpx	9.08163e-05	0.000362466
FBgn0003942	3797.04	0.267617	0.115507	2.31688	0.0205101	0.144703	RpS27A	0.00300336	0.00741815
FBgn0261362	103.476	-0.513314	0.221567	-2.31674	0.0205177	0.144703	PPO1	0.373208	0.429845
FBgn0039022	105.67	0.547311	0.236324	2.31594	0.0205617	0.144926	Nepl13	0.436707	0.492873
FBgn0033816	185.592	-0.393315	0.169913	-2.3148	0.0206236	0.145277	CG4679	0.129678	0.169917
FBgn0032223	1370.16	-0.242302	0.104719	-2.31382	0.0206776	0.14557	GATAd	0.000533614	0.00166449
FBgn0034850	56.4147	0.633295	0.273823	2.31279	0.0207343	0.145747	CG9875	0.570054	0.620223
FBgn0038359	452.58	0.617594	0.267028	2.31285	0.020731	0.145747	CG5614	0.548631	0.599839
FBgn0085364	5759.35	0.497247	0.215008	2.31269	0.0207398	0.145747	lncRNA:CR34335	0.341649	0.397299
FBgn0040725	45.3469	0.651372	0.281747	2.3119	0.020783	0.145878	CG13946	0.59317	0.642174
FBgn0032111	45.6072	0.609081	0.263456	2.31189	0.0207839	0.145878	CG13110	0.536471	0.588352
FBgn0034382	57.9106	0.61633	0.266619	2.31165	0.0207967	0.145878	CG18609	0.546827	0.598097
FBgn0034742	1175.68	-0.268388	0.116112	-2.31145	0.0208079	0.145878	CG4294	0.00320091	0.00783065
FBgn0015754	2811.42	-0.234474	0.101469	-2.31079	0.0208442	0.146046	Lis-1	0.000276032	0.000936572
FBgn0037012	220.815	0.396009	0.171401	2.31042	0.0208647	0.146102	Rcd2	0.135142	0.175856
FBgn0042189	1074.62	0.568855	0.246311	2.3095	0.020916	0.146292	CG17376	0.47393	0.52841
FBgn0029729	10.2776	0.640045	0.277137	2.30949	0.0209165	0.146292	CG12682	0.578773	0.628549
FBgn0036496	43.4054	0.613979	0.266105	2.30728	0.0210391	0.146975	cocoon	0.543415	0.594785
FBgn0000024	10663.9	-0.254334	0.110228	-2.30734	0.0210357	0.146975	Ace	0.00135209	0.00371889
FBgn0031306	2256.74	-0.241887	0.104873	-2.30649	0.0210835	0.147035	CG4577	0.000535173	0.00166847
FBgn0032646	780.78	0.299521	0.129862	2.30646	0.0210851	0.147035	mEFTs	0.0139732	0.0274119
FBgn0036714	1444.19	-0.284586	0.123385	-2.3065	0.0210829	0.147035	CG7692	0.00745687	0.0161162
FBgn0001128	4881.77	-0.193933	0.0841427	-2.30481	0.0211771	0.14759	Gpdh1	1.6822e-06	1.2925e-05
FBgn0051323	359.287	-0.388834	0.168788	-2.30368	0.0212406	0.147944	CG31323	0.122621	0.161893
FBgn0002031	529.38	0.294299	0.127794	2.30291	0.0212839	0.148146	l(2)37Cc	0.011469	0.0232534
FBgn0265726	2342.45	0.238158	0.103425	2.30272	0.0212947	0.148146	Nna1	0.000399413	0.00129131
FBgn0261531	195.757	0.501753	0.217977	2.30186	0.0213432	0.148226	CG42659	0.351329	0.407391
FBgn0034104	24.4627	0.658301	0.28604	2.30143	0.0213672	0.148226	CG15705	0.601176	0.649293
FBgn0035957	150.243	0.526394	0.228766	2.30102	0.0213904	0.148226	CG5144	0.398968	0.455495
FBgn0026197	45933.6	0.269184	0.116979	2.30112	0.0213846	0.148226	lncRNA:noe	0.00347274	0.00841189
FBgn0028997	106.603	0.510793	0.221979	2.30109	0.0213864	0.148226	nmdyn-D7	0.369142	0.425578
FBgn0047351	369.902	0.642445	0.279065	2.30214	0.0213275	0.148226	CG31468	0.581598	0.63092
FBgn0039311	686.477	0.318205	0.138292	2.30096	0.021394	0.148226	CG10513	0.0268691	0.04602
FBgn0031130	42.2231	0.636307	0.276709	2.29956	0.0214733	0.148688	CG15452	0.573603	0.623452
FBgn0035009	15.3724	0.656008	0.285369	2.29881	0.0215159	0.148844	CG16837	0.598304	0.646783
FBgn0037369	138.616	0.468242	0.203697	2.29871	0.0215212	0.148844	CG2100	0.283319	0.336808
FBgn0265264	1338.39	0.557686	0.242803	2.29686	0.0216266	0.149485	CG17097	0.455277	0.510801
FBgn0032472	349.78	-0.330436	0.143886	-2.29652	0.0216461	0.149533	CG9928	0.0384512	0.0611342
FBgn0032072	44.8536	0.631809	0.275173	2.29604	0.0216734	0.149634	CG9483	0.56759	0.617999
FBgn0038355	112.605	0.556094	0.242261	2.29544	0.021708	0.149785	CG4520	0.452574	0.508154
FBgn0002566	825.635	-0.28942	0.126133	-2.29457	0.0217578	0.149953	lt	0.00956198	0.0199494
FBgn0038233	205.271	0.414332	0.180556	2.29475	0.0217475	0.149953	HtrA2	0.172322	0.216523
FBgn0035505	2355.58	-0.235213	0.102551	-2.29361	0.0218128	0.15013	Teh2	0.000324244	0.00107783
FBgn0039887	61.8056	0.552808	0.24106	2.29324	0.0218344	0.15013	CG2053	0.446943	0.502358
FBgn0024811	428.104	-0.304744	0.132887	-2.29325	0.0218335	0.15013	Crk	0.0174854	0.0328957
FBgn0030449	43.684	0.625494	0.27271	2.29363	0.021812	0.15013	Fer3HCH	0.559076	0.609797
FBgn0051875	43.2795	0.619545	0.270307	2.292	0.0219054	0.150444	CG31875	0.550901	0.601883
FBgn0265276	4310.25	-0.217803	0.0950238	-2.29209	0.0219004	0.150444	l(3)neo38	5.58025e-05	0.000239098
FBgn0034659	31.1633	0.641543	0.280175	2.28979	0.0220333	0.151234	CG4021	0.58002	0.629383
FBgn0032457	64.6486	0.588113	0.256983	2.28853	0.0221067	0.151649	CG15483	0.504891	0.558287
FBgn0037142	1084.15	-0.248424	0.108567	-2.2882	0.0221258	0.151692	CG14562	0.000968235	0.0027825
FBgn0039609	60.5472	0.580245	0.25362	2.28785	0.0221462	0.151744	Nepl17	0.492579	0.546312
FBgn0036144	1816.35	-0.221137	0.0966892	-2.28709	0.0221908	0.151912	GlcAT-P	8.39979e-05	0.000339039
FBgn0013690	38.1141	0.651103	0.284699	2.28699	0.0221965	0.151912	mt:tRNA:Cys-GCA	0.591854	0.640985
FBgn0039419	1848.01	0.260604	0.113965	2.2867	0.0222135	0.15194	CG12290	0.00221284	0.00568836
FBgn0031496	67.6749	0.592783	0.259261	2.28644	0.0222288	0.151957	CG17258	0.512032	0.565014
FBgn0005564	1616.85	-0.238181	0.104224	-2.28528	0.0222963	0.15233	Shal	0.000438517	0.00140235
FBgn0034097	44.943	0.588968	0.257894	2.28376	0.0223857	0.152852	CG3687	0.506197	0.559625
FBgn0025806	697.073	-0.276704	0.121227	-2.28252	0.0224587	0.153262	Rap2l	0.00549812	0.0125014
FBgn0031670	260.876	0.358952	0.157311	2.2818	0.0225009	0.153428	SelT	0.0753996	0.10669
FBgn0033421	306.964	-0.352087	0.154312	-2.28167	0.0225091	0.153428	CG1888	0.0656338	0.0950147
FBgn0265535	38.1834	0.633316	0.277757	2.28011	0.0226013	0.153968	CG44385	0.569101	0.619301
FBgn0032312	53.8215	0.576865	0.253183	2.27845	0.0227	0.154551	CG14071	0.487243	0.541258
FBgn0005561	783.616	-0.306879	0.134711	-2.27805	0.0227239	0.154624	sv	0.019495	0.0359424
FBgn0085204	40.3737	0.616198	0.270545	2.27762	0.0227493	0.154708	CG34175	0.545958	0.597297
FBgn0023541	57.4442	0.602893	0.264735	2.27734	0.0227658	0.154731	Cyp4d14	0.527	0.579312
FBgn0028570	44.1792	0.603365	0.264999	2.27686	0.0227946	0.154749	robl22E	0.527682	0.579845
FBgn0030136	7377.19	0.230072	0.10104	2.27704	0.022784	0.154749	RpS28b	0.000222065	0.000774632
FBgn0034904	40.7	0.620884	0.272797	2.27599	0.0228463	0.154833	CG15800	0.552381	0.603221
FBgn0036153	37.7704	0.610805	0.268365	2.27603	0.0228445	0.154833	CG7573	0.538358	0.590037
FBgn0027279	4274.2	-0.220662	0.0969383	-2.27631	0.0228273	0.154833	l(1)G0196	8.5615e-05	0.000344505
FBgn0035657	73.1961	0.572785	0.251804	2.27473	0.0229224	0.15517	alphaKap4	0.480714	0.534964
FBgn0030643	36.3156	0.618135	0.271726	2.27485	0.0229149	0.15517	CG15641	0.548583	0.599839
FBgn0266347	1653.23	-0.234649	0.1032	-2.27374	0.0229817	0.155452	nAChRalpha4	0.000343754	0.0011331
FBgn0040648	14.0767	0.645085	0.283729	2.27359	0.0229904	0.155452	CG11666	0.583908	0.633193
FBgn0259110	4090.18	-0.243881	0.107301	-2.27286	0.0230348	0.155663	mmd	0.00073963	0.00221401
FBgn0032533	33.7037	0.633848	0.278933	2.2724	0.0230623	0.155759	CG16888	0.569562	0.619745
FBgn0031004	86.6994	0.537161	0.236417	2.27209	0.0230814	0.155799	CG7992	0.419883	0.475889
FBgn0259680	948.853	-0.325591	0.143323	-2.27172	0.0231033	0.155858	Pkcdelta	0.0351718	0.0569725
FBgn0026086	3584.73	-0.244953	0.107845	-2.27135	0.0231255	0.155919	Adar	0.000808642	0.00238488
FBgn0034706	397.606	0.301829	0.132985	2.26964	0.0232294	0.15653	CG11275	0.0166249	0.0316095
FBgn0003930	931.354	0.344846	0.151993	2.26883	0.0232788	0.156773	snRNA:U4:39B	0.0570775	0.0844738
FBgn0000241	962.685	-0.260706	0.114933	-2.26832	0.0233098	0.156803	bw	0.00239177	0.00608861
FBgn0052251	19.1162	-0.64893	0.286083	-2.26833	0.0233089	0.156803	Claspin	0.588466	0.637842
FBgn0052483	19.4	0.648795	0.286103	2.2677	0.0233475	0.156967	CG32483	0.588276	0.637695
FBgn0264855	2747.12	-0.196252	0.0865725	-2.2669	0.0233961	0.157115	AP-2alpha	3.56113e-06	2.38966e-05
FBgn0031711	204.202	0.445026	0.196308	2.26698	0.0233915	0.157115	CG6907	0.237972	0.288838
FBgn0036900	961.41	-0.236922	0.104547	-2.26617	0.0234407	0.157325	CG8765	0.000435757	0.00139579
FBgn0029728	126.884	0.466393	0.20586	2.26558	0.0234769	0.157478	CG2861	0.282317	0.335717
FBgn0065099	31319.2	0.630564	0.278542	2.26381	0.0235861	0.15812	snRNA:7SK	0.565022	0.615373
FBgn0039924	759.664	-0.274432	0.121238	-2.26358	0.0235997	0.158122	PIP4K	0.00521354	0.011921
FBgn0038079	27.1076	-0.635977	0.28101	-2.26318	0.0236243	0.158197	NijC	0.572028	0.622084
FBgn0266084	2989.89	-0.206625	0.0913135	-2.26281	0.0236477	0.158264	Fhos	1.71183e-05	8.79709e-05
FBgn0000492	464.094	0.310578	0.137322	2.26167	0.0237176	0.158642	Dr	0.0228523	0.0406333
FBgn0013770	1298.57	0.2474	0.109409	2.26125	0.0237439	0.158728	Cp1	0.00101664	0.00289838
FBgn0005677	794.975	-0.269198	0.119153	-2.25925	0.0238677	0.15924	dac	0.00402377	0.00955049
FBgn0052206	1776.6	-0.250017	0.110668	-2.25916	0.0238733	0.15924	CG32206	0.00123667	0.00343588
FBgn0036929	154.514	-0.422014	0.186803	-2.25914	0.0238746	0.15924	CG7668	0.191522	0.237797
FBgn0039788	60.1395	0.571727	0.253008	2.25972	0.0238388	0.15924	Rpt6R	0.479139	0.533513
FBgn0030314	216.901	-0.376111	0.166537	-2.25842	0.0239193	0.159448	CG11696	0.104906	0.141304
FBgn0003091	2590.46	-0.222199	0.0984135	-2.25781	0.0239575	0.159476	Pkc53E	0.000113851	0.000438954
FBgn0083018	13.1688	-0.63466	0.281108	-2.25771	0.0239639	0.159476	snoRNA:Psi18S-841b	0.570163	0.620285
FBgn0038018	50.5064	0.632951	0.280327	2.2579	0.0239519	0.159476	Tim17a1	0.567962	0.618346
FBgn0004828	6759.61	0.230379	0.102083	2.25678	0.024022	0.159772	His3.3B	0.000256874	0.000879923
FBgn0028473	8608.29	0.205071	0.0908811	2.25647	0.024041	0.159808	Non1	1.45692e-05	7.67095e-05
FBgn0051525	63.8901	0.553402	0.245287	2.25614	0.0240621	0.159858	CG31525	0.44881	0.504265
FBgn0260764	25.7314	-0.641558	0.284455	-2.25539	0.0241089	0.160079	CG42562	0.578853	0.628578
FBgn0039929	315.584	-0.329749	0.146246	-2.25476	0.0241485	0.160252	CG11076	0.0404834	0.0637465
FBgn0035581	962.441	0.553735	0.245623	2.25441	0.0241702	0.160306	Dnah3	0.449416	0.504897
FBgn0035574	2411.34	-0.241446	0.107122	-2.25395	0.0241995	0.160351	RhoGEF64C	0.000671123	0.00203163
FBgn0262687	97.3515	0.492231	0.218394	2.25387	0.0242041	0.160351	lncRNA:CR43157	0.335562	0.391147
FBgn0262124	2161.64	-0.203008	0.0901274	-2.25245	0.0242938	0.160854	uex	1.12788e-05	6.1613e-05
FBgn0052313	54.2522	0.591471	0.262695	2.25155	0.0243506	0.16114	CG32313	0.509883	0.562962
FBgn0039325	539.201	-0.273225	0.121393	-2.25073	0.0244024	0.161392	CG10560	0.00511442	0.0117285
FBgn0038337	307.91	0.339843	0.15103	2.25017	0.0244384	0.16154	CG6125	0.0522963	0.078501
FBgn0063498	100.71	-0.470904	0.20933	-2.24957	0.024476	0.161698	GstE2	0.292921	0.346823
FBgn0052000	7577.24	-0.230879	0.102647	-2.24926	0.0244958	0.161738	anne	0.000280778	0.000949397
FBgn0034681	41.7933	0.603182	0.268275	2.24838	0.0245522	0.16202	CG9308	0.527073	0.579338
FBgn0011239	104.08	0.502253	0.223429	2.24793	0.0245806	0.162116	ms(2)35Ci	0.355624	0.411643
FBgn0035733	366.385	-0.325385	0.144818	-2.24685	0.0246499	0.162397	CG8641	0.0365317	0.0586675
FBgn0065064	869.797	-0.311496	0.138651	-2.24662	0.0246645	0.162397	snoRNA:Psi28S-291	0.0242853	0.0425968
FBgn0030328	2980.91	-0.192938	0.0858729	-2.24679	0.0246535	0.162397	Amun	2.49543e-06	1.77082e-05
FBgn0011676	361.814	-0.327061	0.145758	-2.24387	0.024841	0.163468	Nos	0.0384144	0.0611004
FBgn0033856	76.5404	0.58947	0.262761	2.24337	0.024873	0.163588	CG13334	0.506844	0.560236
FBgn0029667	48.1799	0.5946	0.265093	2.24299	0.0248974	0.163657	Gas8	0.514501	0.567476
FBgn0027507	566.626	-0.277087	0.123547	-2.24277	0.0249115	0.163659	CG1344	0.00635165	0.0141262
FBgn0052846	73.2221	0.558993	0.249279	2.24243	0.0249334	0.163711	CG32846	0.458513	0.513688
FBgn0052017	3053.17	-0.274666	0.122504	-2.24211	0.0249545	0.163759	CG32017	0.00565523	0.0128019
FBgn0015585	14.8415	0.633913	0.282836	2.24128	0.0250082	0.163929	Acp63F	0.568702	0.618997
FBgn0038702	54.6404	0.572495	0.255411	2.24146	0.0249961	0.163929	CG3739	0.480534	0.534813
FBgn0030222	23.2119	0.640865	0.286086	2.24012	0.0250834	0.164331	CG9806	0.577462	0.627299
FBgn0000078	409.717	-0.392424	0.175225	-2.23954	0.0251208	0.164484	Amy-d	0.135926	0.176671
FBgn0039528	4390.12	0.212108	0.0947458	2.23871	0.0251751	0.164748	dsd	4.15434e-05	0.000187152
FBgn0264574	4747.45	-0.229184	0.102397	-2.23819	0.0252084	0.164875	Glut1	0.000255898	0.000877598
FBgn0053303	212.164	0.39393	0.176047	2.23764	0.0252442	0.165018	CG33303	0.138933	0.179984
FBgn0033382	1230.59	0.235747	0.105402	2.23664	0.0253096	0.165353	Hydr1	0.000461227	0.00146662
FBgn0040674	19.6	0.639635	0.286097	2.23573	0.0253694	0.165653	CG9445	0.575775	0.625582
FBgn0039504	44.2036	0.596348	0.266801	2.23518	0.0254056	0.165797	CG14260	0.517019	0.569774
FBgn0030721	51.8149	0.590808	0.264351	2.23494	0.0254215	0.165809	CG12698	0.508821	0.561895
FBgn0039656	203.395	-0.365435	0.163535	-2.23461	0.0254432	0.165859	CG11951	0.0897348	0.123579
FBgn0029114	796.823	0.244449	0.109421	2.23403	0.025481	0.166013	Tollo	0.000929246	0.00268616
FBgn0051418	21.3262	0.638887	0.286091	2.23316	0.0255382	0.166295	CG31418	0.574753	0.624586
FBgn0264330	40.4312	-0.59582	0.266891	-2.23245	0.0255853	0.166354	CG43789	0.516225	0.568956
FBgn0086899	4505.04	-0.210256	0.094177	-2.23256	0.0255778	0.166354	Tlk	3.464e-05	0.00015909
FBgn0030480	53.4762	0.593005	0.265638	2.23238	0.0255897	0.166354	Tim9a	0.512077	0.565014
FBgn0039261	852.665	-0.259813	0.116417	-2.23174	0.0256323	0.166517	Ythdf	0.00261136	0.00656261
FBgn0039271	39.0933	-0.595169	0.266703	-2.23158	0.0256429	0.166517	CG11839	0.515264	0.568158
FBgn0003093	5547.52	-0.207135	0.092836	-2.23119	0.0256686	0.166592	Pkc98E	2.35225e-05	0.000114496
FBgn0031690	238.491	0.626324	0.280745	2.23094	0.0256853	0.166608	CG7742	0.558564	0.609334
FBgn0262742	14561.4	-0.227557	0.102136	-2.22798	0.0258816	0.167697	Fas1	0.000233224	0.000809728
FBgn0259198	17.1346	0.637001	0.28589	2.22813	0.0258719	0.167697	CG42302	0.572217	0.622206
FBgn0032269	1677.66	0.557239	0.250161	2.22752	0.0259124	0.16779	w-cup	0.455878	0.511329
FBgn0013812	509.448	-0.637181	0.286072	-2.22734	0.0259244	0.16779	Dhc93AB	0.572418	0.622279
FBgn0259229	430.655	0.333008	0.149557	2.22663	0.0259719	0.168005	CG42329	0.0460257	0.0704292
FBgn0030607	381.58	-0.324512	0.145766	-2.22626	0.0259968	0.168075	dob	0.0369871	0.0592697
FBgn0039326	175.289	-0.406543	0.182699	-2.2252	0.0260676	0.16844	CG10562	0.16439	0.207871
FBgn0029838	114.214	0.472717	0.212538	2.22415	0.0261381	0.168803	CG4666	0.298708	0.353073
FBgn0050419	662.398	-0.27327	0.122902	-2.22348	0.0261835	0.169004	CG30419	0.00560452	0.0126993
FBgn0016920	98.8755	-0.489998	0.220559	-2.22162	0.026309	0.169552	nompC	0.333393	0.388963
FBgn0266450	713.172	-0.266959	0.120166	-2.22158	0.0263116	0.169552	Kr-h1	0.00406812	0.00963443
FBgn0040211	277.464	-0.385216	0.173383	-2.22177	0.0262991	0.169552	hgo	0.124649	0.164075
FBgn0265597	2420.61	-0.235862	0.10621	-2.22071	0.0263709	0.169842	rad	0.000506531	0.00158842
FBgn0039683	56.1846	-0.551607	0.248461	-2.2201	0.0264121	0.170015	dmrt99B	0.446603	0.502168
FBgn0030425	600.035	0.322915	0.145472	2.21977	0.0264342	0.170064	Nep6	0.035823	0.0577892
FBgn0086691	207.51	-0.361188	0.162824	-2.21827	0.0265364	0.17035	UK114	0.0846699	0.118009
FBgn0033954	2299.75	0.533559	0.24051	2.21845	0.0265242	0.17035	CG12860	0.415379	0.4716
FBgn0034176	282.098	0.341236	0.153792	2.21881	0.0264995	0.17035	ste24a	0.0565083	0.0837892
FBgn0034592	54.6795	0.56358	0.25403	2.21856	0.0265169	0.17035	CG9406	0.46646	0.521166
FBgn0044047	436.849	-0.318847	0.143756	-2.21797	0.0265569	0.170389	Ilp6	0.0320733	0.0530165
FBgn0051320	339.27	0.321718	0.145118	2.21694	0.0266274	0.170748	HEATR2	0.0348393	0.056597
FBgn0038449	45.8099	0.596906	0.269429	2.21544	0.0267297	0.171235	CG17562	0.517678	0.570394
FBgn0040069	11.4659	0.609546	0.27514	2.2154	0.0267323	0.171235	vanin-like	0.535598	0.58745
FBgn0032587	841.28	0.236408	0.106736	2.21488	0.0267685	0.171374	CG5953	0.000546229	0.00169756
FBgn0036556	2969.5	-0.211125	0.0953434	-2.21436	0.0268038	0.171506	hzg	4.4099e-05	0.000196414
FBgn0043025	273.011	0.476591	0.215333	2.21327	0.0268789	0.171894	Adgf-A2	0.307385	0.361951
FBgn0035815	166.481	-0.432447	0.195459	-2.21247	0.026934	0.172153	Snmp2	0.217608	0.266453
FBgn0025726	22480.7	-0.22711	0.102709	-2.21121	0.0270214	0.172618	unc-13	0.000246848	0.000851015
FBgn0051088	27.1162	0.630623	0.285451	2.20922	0.0271595	0.173406	CG31088	0.563543	0.614102
FBgn0030998	48.6418	0.579174	0.26224	2.20856	0.027205	0.173603	CG14195	0.491194	0.544929
FBgn0085260	70.348	-0.523011	0.236873	-2.20798	0.0272458	0.173769	CG34231	0.396838	0.453475
FBgn0030244	23.723	-0.629627	0.285212	-2.20758	0.0272737	0.173853	CG2157	0.56222	0.612831
FBgn0028950	69.0785	0.57813	0.261992	2.20667	0.0273373	0.173911	CG15255	0.489598	0.543567
FBgn0023090	111.399	0.486276	0.220332	2.20701	0.0273133	0.173911	dtr	0.327114	0.382167
FBgn0266416	83.1619	0.531319	0.240786	2.2066	0.0273418	0.173911	asRNA:CR45056	0.411851	0.468315
FBgn0038356	27.8537	0.623388	0.28249	2.20676	0.0273306	0.173911	CG12784	0.554099	0.604873
FBgn0040734	192.998	-0.405482	0.183816	-2.20591	0.0273905	0.174127	BomS5	0.16443	0.207878
FBgn0011259	5434.98	-0.234523	0.106358	-2.20504	0.0274514	0.174421	Sema1a	0.000492253	0.00155106
FBgn0261041	2749.26	-0.227978	0.103425	-2.20429	0.0275041	0.174661	stj	0.000278601	0.000942848
FBgn0034295	350.075	0.428187	0.194273	2.20405	0.0275208	0.174674	CG10911	0.209838	0.257634
FBgn0010053	496.847	0.271845	0.123381	2.20329	0.027574	0.174845	Jheh1	0.00557741	0.0126476
FBgn0035097	67.5485	0.531964	0.241446	2.20325	0.0275775	0.174845	CG13405	0.413129	0.469542
FBgn0259243	3687.87	-0.216382	0.0982248	-2.20292	0.0276002	0.174895	Pka-R1	8.75681e-05	0.000351046
FBgn0266623	70.7022	0.51852	0.23543	2.20244	0.027634	0.174921	asRNA:CR45130	0.388889	0.445383
FBgn0040679	51.042	0.585953	0.26604	2.2025	0.02763	0.174921	CG11373	0.501486	0.554989
FBgn0262568	49.9289	0.617458	0.280381	2.20221	0.0276503	0.174931	CG43108	0.546133	0.597394
FBgn0250847	30.9843	0.623547	0.283195	2.20183	0.0276775	0.174984	CG14034	0.554187	0.604913
FBgn0053558	3599.44	-0.203945	0.092632	-2.20167	0.0276884	0.174984	mim	1.95077e-05	9.78622e-05
FBgn0035553	102.673	0.469425	0.213308	2.20069	0.0277581	0.175331	CG13722	0.294031	0.348033
FBgn0037838	92.0138	-0.485506	0.220686	-2.19998	0.0278083	0.175554	TTLL15	0.326114	0.381188
FBgn0034085	107.653	0.519059	0.236135	2.19815	0.0279387	0.176214	Ptp52F	0.390087	0.446475
FBgn0037296	50.3994	0.594034	0.27025	2.19809	0.0279427	0.176214	Prosbeta2R2	0.513389	0.566409
FBgn0040291	41.1828	0.6172	0.280866	2.19749	0.0279855	0.176295	Roc1b	0.54569	0.597075
FBgn0038099	27.7406	0.610895	0.277994	2.19751	0.0279838	0.176295	CG7091	0.537162	0.588945
FBgn0025814	605.506	-0.276152	0.125704	-2.19685	0.0280314	0.17649	Mgstl	0.00701192	0.0153316
FBgn0030141	729.067	-0.257929	0.117422	-2.1966	0.0280492	0.176508	Gga	0.00267552	0.00669534
FBgn0032286	552.296	-0.288832	0.131513	-2.19622	0.0280763	0.176585	CG7300	0.0121702	0.0244705
FBgn0004227	1117.97	-0.262108	0.119408	-2.19507	0.0281584	0.177006	nonA	0.00342759	0.0083299
FBgn0035041	601.676	-0.282971	0.128956	-2.19432	0.0282123	0.177074	CG13594	0.00959484	0.0200073
FBgn0267710	20.0532	0.627505	0.285975	2.19426	0.0282166	0.177074	lncRNA:CR46043	0.559129	0.609799
FBgn0004606	1952.47	-0.21857	0.0996122	-2.19421	0.0282202	0.177074	zfh1	0.00011745	0.000450912
FBgn0039875	680.804	0.26885	0.122534	2.19409	0.0282292	0.177074	sip3	0.00494306	0.0113875
FBgn0266411	7481.22	-0.203025	0.0925629	-2.19338	0.0282803	0.1773	sima	1.84366e-05	9.33627e-05
FBgn0086909	806.048	-0.254246	0.115939	-2.19294	0.0283117	0.177403	CG31751	0.00216876	0.00558845
FBgn0011205	2039.67	0.202361	0.092306	2.19229	0.0283588	0.177604	fbl	1.69962e-05	8.75307e-05
FBgn0001258	134.351	0.414301	0.189125	2.19062	0.0284792	0.178169	Ldh	0.183429	0.228782
FBgn0052533	239.121	-0.340481	0.155421	-2.19069	0.028474	0.178169	CG32533	0.0578563	0.0854891
FBgn0033853	1025.71	0.240968	0.110023	2.19016	0.0285124	0.178282	CG6145	0.000884272	0.00257318
FBgn0003513	204.2	-0.399655	0.182516	-2.1897	0.028546	0.178397	ss	0.154982	0.19765
FBgn0032969	257.401	0.45924	0.209801	2.18893	0.0286016	0.178617	CG2528	0.274503	0.32735
FBgn0036290	236.126	-0.360857	0.164865	-2.1888	0.0286114	0.178617	CG10638	0.0870217	0.120518
FBgn0026376	1793.22	-0.246364	0.112583	-2.18829	0.0286485	0.178754	Rgl	0.00131684	0.00363378
FBgn0031378	51.4961	0.600297	0.274374	2.18788	0.0286784	0.178846	CG15362	0.522285	0.574718
FBgn0004173	737.922	0.611402	0.279623	2.18652	0.0287776	0.17937	Mst84Db	0.537666	0.589443
FBgn0034515	15.8144	-0.612602	0.280397	-2.18476	0.0289062	0.180027	CG13428	0.539261	0.590972
FBgn0260660	1641.34	-0.223457	0.102284	-2.18466	0.0289135	0.180027	Mp	0.000204411	0.000721154
FBgn0020371	81.6396	0.533581	0.244284	2.18427	0.0289425	0.180112	Tim17b2	0.416703	0.472693
FBgn0039827	321.766	-0.346621	0.158732	-2.18368	0.0289856	0.180285	CG1544	0.0666089	0.0962609
FBgn0037654	149.219	0.445058	0.203867	2.18308	0.02903	0.180466	CG11983	0.246276	0.297447
FBgn0026206	27323.7	-0.238615	0.109335	-2.18243	0.0290781	0.18067	mei-P26	0.000768087	0.00228643
FBgn0005658	423.497	-0.278702	0.127729	-2.18199	0.0291104	0.180681	Ets65A	0.0082482	0.0176071
FBgn0261674	370.573	-0.311643	0.142821	-2.18204	0.0291062	0.180681	CG42709	0.0278282	0.0473943
FBgn0039883	6998.52	-0.246875	0.113274	-2.17946	0.0292978	0.181748	RhoGAP100F	0.00141927	0.00387383
FBgn0032487	50.0418	0.553701	0.254079	2.17925	0.0293132	0.181748	Ski6	0.451038	0.506479
FBgn0031770	1195.2	-0.256057	0.117533	-2.17861	0.0293608	0.181835	CG13995	0.00256767	0.00647489
FBgn0032229	604.084	0.355694	0.163267	2.17861	0.0293607	0.181835	ClpP	0.0801213	0.112575
FBgn0042650	1417.66	-0.232412	0.106687	-2.17844	0.0293735	0.181835	disco-r	0.000475694	0.00150775
FBgn0043575	11.9846	0.608638	0.279435	2.1781	0.0293983	0.181893	PGRP-SC2	0.53376	0.585815
FBgn0259738	368.776	-0.299171	0.137418	-2.17709	0.0294742	0.182267	CG42392	0.0187752	0.0348551
FBgn0024941	2666.32	-0.226135	0.103881	-2.17688	0.0294896	0.182267	RSG7	0.000275937	0.000936517
FBgn0034573	509.006	0.273515	0.125673	2.1764	0.0295255	0.182361	Sou	0.00660169	0.0145915
FBgn0036208	171.996	-0.387017	0.177836	-2.17626	0.0295357	0.182361	CG10361	0.132837	0.173459
FBgn0034883	48.0826	0.586311	0.269534	2.17528	0.0296094	0.182721	Eglp2	0.501996	0.555502
FBgn0037064	1071.32	0.519236	0.238749	2.17481	0.029644	0.182838	CG9389	0.391544	0.447946
FBgn0052713	33.9164	0.614175	0.282441	2.17452	0.0296658	0.182877	CG32713	0.541189	0.592809
FBgn0034644	3472.78	-0.192399	0.0884938	-2.17415	0.0296935	0.182953	CG10082	4.58117e-06	2.92937e-05
FBgn0039536	5135.83	-0.241197	0.110959	-2.17375	0.0297241	0.183045	unc80	0.000973716	0.00279416
FBgn0017561	1003.03	-0.263927	0.12147	-2.17277	0.0297974	0.183401	Ork1	0.00410983	0.00971369
FBgn0086784	5139.24	-0.223314	0.102856	-2.17113	0.0299214	0.184068	stmA	0.000219002	0.000765762
FBgn0259184	29.6721	0.620595	0.285906	2.17062	0.0299596	0.184207	CG42288	0.549591	0.600708
FBgn0032345	36.3624	0.589621	0.271725	2.16992	0.0300131	0.18444	CG14921	0.506839	0.560236
FBgn0032409	371.872	-0.296208	0.136536	-2.16946	0.030048	0.184461	Ced-12	0.0172209	0.0325069
FBgn0001085	445.228	-0.327889	0.151153	-2.16925	0.0300635	0.184461	fz	0.0444944	0.0685701
FBgn0037376	147.156	0.436851	0.201348	2.16963	0.0300348	0.184461	Hat1	0.230987	0.281171
FBgn0013276	19.0212	-0.615833	0.284006	-2.16838	0.0301296	0.184771	Hsp70Ab	0.543278	0.594767
FBgn0000036	4482.55	-0.244978	0.113023	-2.1675	0.0301969	0.185088	nAChRalpha1	0.00131449	0.00362814
FBgn0052718	27.7909	0.609311	0.281185	2.16694	0.0302394	0.185251	CG32718	0.534502	0.586465
FBgn0051017	43.4561	0.613969	0.283527	2.16547	0.0303517	0.185843	PH4alphaNE3	0.540743	0.592431
FBgn0261673	724.227	0.290803	0.134336	2.16474	0.0304076	0.185932	nemy	0.0142723	0.0278918
FBgn0036706	44.5596	0.583947	0.269763	2.16466	0.0304135	0.185932	ND-24L	0.498498	0.551994
FBgn0039799	58.1638	0.563309	0.260205	2.16487	0.0303977	0.185932	CG15543	0.466839	0.52154
FBgn0032285	21708.7	0.219544	0.101439	2.16429	0.030442	0.18601	CG17108	0.000157688	0.000579189
FBgn0036512	470.221	0.292085	0.135005	2.1635	0.0305024	0.186282	CG16979	0.0150269	0.029074
FBgn0013673	35.9684	0.590738	0.273121	2.16292	0.0305476	0.186462	mt:ATPase8	0.508436	0.561627
FBgn0034684	56.8868	0.568452	0.262852	2.16263	0.0305697	0.18649	CG13501	0.474957	0.529256
FBgn0025838	52.3092	0.575912	0.266324	2.16245	0.0305837	0.18649	CG2652	0.486446	0.540475
FBgn0032013	191.108	-0.369842	0.171081	-2.16179	0.0306344	0.186606	Scgalpha	0.104301	0.140537
FBgn0040391	81.1606	0.526805	0.243674	2.16192	0.030624	0.186606	CG2854	0.405681	0.462102
FBgn0259151	140.485	0.490196	0.226901	2.16039	0.0307423	0.187166	CG42266	0.338099	0.393909
FBgn0031265	264.769	0.33178	0.153613	2.15984	0.0307852	0.187331	CG2794	0.0496575	0.0751232
FBgn0040696	26.8191	0.609101	0.282127	2.15896	0.030853	0.187472	CG18675	0.534092	0.58607
FBgn0262982	14.866	0.615452	0.285074	2.15892	0.0308561	0.187472	CG43290	0.542587	0.594231
FBgn0029529	67.3884	-0.528673	0.244864	-2.15904	0.0308467	0.187472	CG13365	0.409092	0.4656
FBgn0265272	45.2581	0.559125	0.259047	2.15839	0.0308974	0.18756	CG30060	0.460275	0.515427
FBgn0037671	1260.74	0.227641	0.105477	2.1582	0.0309121	0.18756	ATP6AP2	0.000352449	0.00115788
FBgn0003654	704.888	-0.285346	0.132219	-2.15812	0.0309182	0.18756	sw	0.011724	0.023685
FBgn0003062	197.407	0.374405	0.173508	2.15786	0.0309388	0.187588	Fib	0.112463	0.150061
FBgn0050485	121.485	0.447391	0.207385	2.1573	0.0309826	0.187758	CG30485	0.253548	0.305294
FBgn0034715	75.1037	0.592867	0.274964	2.15616	0.0310709	0.187907	Oatp58Db	0.511466	0.564552
FBgn0027500	39.8144	0.600818	0.278607	2.1565	0.0310444	0.187907	spd-2	0.522691	0.575111
FBgn0036747	10.8443	0.587167	0.272277	2.15651	0.031044	0.187907	CG6052	0.503229	0.556658
FBgn0000147	101.277	0.476545	0.220998	2.15633	0.0310575	0.187907	aurA	0.311862	0.366609
FBgn0040510	225.591	0.473042	0.219498	2.15511	0.0311529	0.188005	ACXA	0.305063	0.359792
FBgn0050344	324.662	0.305499	0.141767	2.15494	0.0311668	0.188005	CG30344	0.0243455	0.0426706
FBgn0034662	1268.9	0.550359	0.255366	2.15518	0.031148	0.188005	CG13492	0.446106	0.501705
FBgn0053278	39.9957	0.568741	0.263841	2.15562	0.031113	0.188005	CG33278	0.475488	0.529797
FBgn0024975	100.894	-0.466272	0.216345	-2.15522	0.0311442	0.188005	CG2712	0.291634	0.345404
FBgn0031644	79.0006	0.522289	0.242575	2.15311	0.0313104	0.188609	CG15625	0.398061	0.454696
FBgn0033010	1430.22	-0.22805	0.10596	-2.15223	0.031379	0.188609	Atf6	0.000378073	0.00123007
FBgn0263593	4433.18	-0.184341	0.0856592	-2.15203	0.0313949	0.188609	Lpin	1.45606e-06	1.15176e-05
FBgn0008636	121.319	-0.426336	0.197985	-2.15338	0.0312887	0.188609	hbn	0.211507	0.259412
FBgn0037736	1504.35	-0.223284	0.103744	-2.15226	0.0313768	0.188609	side-VII	0.000244905	0.000845305
FBgn0015230	67.3534	0.526947	0.24485	2.15212	0.0313877	0.188609	Glut3	0.40635	0.462685
FBgn0030319	100.933	0.562472	0.261337	2.15228	0.031375	0.188609	CG2533	0.465709	0.520524
FBgn0027537	340.3	0.32962	0.15312	2.15269	0.0313432	0.188609	Nup93-1	0.0476981	0.0725311
FBgn0034612	87.9601	0.518898	0.241188	2.15143	0.0314424	0.188777	CG10505	0.392075	0.44851
FBgn0085386	1020.57	-0.237381	0.110345	-2.15127	0.0314548	0.188777	CG34357	0.000816462	0.00240373
FBgn0034737	22.9363	0.613636	0.285287	2.15094	0.031481	0.188838	CG11362	0.540029	0.591704
FBgn0004425	19.921	-0.614909	0.286084	-2.1494	0.0316028	0.189436	LysB	0.541684	0.593297
FBgn0003423	4063.57	-0.193421	0.0899939	-2.14927	0.0316127	0.189436	slgA	6.78362e-06	4.05327e-05
FBgn0053970	900.923	-0.269892	0.125609	-2.14866	0.031661	0.189628	osy	0.00606499	0.0135964
FBgn0051635	5613.62	-0.18502	0.0861522	-2.14759	0.0317463	0.189658	CG31635	1.72288e-06	1.31347e-05
FBgn0031930	13.9591	0.607065	0.282618	2.148	0.0317134	0.189658	CG7025	0.531168	0.583132
FBgn0002715	140.195	0.455037	0.211833	2.14809	0.0317063	0.189658	mei-S332	0.269826	0.322522
FBgn0083005	60.4618	-0.545257	0.253879	-2.1477	0.0317372	0.189658	snoRNA:Psi28S-1175a	0.437861	0.494034
FBgn0030374	15.9595	0.600477	0.279588	2.14772	0.0317358	0.189658	CG15734	0.522126	0.574596
FBgn0032588	86.4954	0.520253	0.242307	2.14709	0.0317865	0.189802	CG5968	0.394713	0.451265
FBgn0043471	76.4995	0.517697	0.24128	2.14562	0.031903	0.190246	kappaTry	0.390205	0.446543
FBgn0037456	65.3237	0.548677	0.255694	2.14584	0.031886	0.190246	CG1138	0.443576	0.499403
FBgn0038756	12.8247	0.604654	0.281818	2.14555	0.0319092	0.190246	CG4783	0.527852	0.579978
FBgn0265059	16.9877	-0.612065	0.285427	-2.14439	0.0320019	0.190702	lncRNA:CR44170	0.537824	0.589508
FBgn0031937	174.693	-0.397823	0.185592	-2.14353	0.0320705	0.190863	CG13795	0.156647	0.199449
FBgn0051106	88.073	0.510528	0.238175	2.1435	0.032073	0.190863	CG31106	0.377323	0.433823
FBgn0030317	6841.1	-0.200161	0.0933828	-2.14344	0.0320774	0.190863	pkm	1.88871e-05	9.54388e-05
FBgn0034911	1439.1	-0.218865	0.102124	-2.14312	0.0321033	0.190886	GlyT	0.000168648	0.000612764
FBgn0086690	5209.16	-0.186172	0.086883	-2.14279	0.0321299	0.190886	Plp	2.21652e-06	1.60655e-05
FBgn0038069	14.8651	0.605849	0.282712	2.14299	0.0321142	0.190886	CG11608	0.529447	0.581405
FBgn0002789	380.825	0.344524	0.1608	2.14256	0.0321488	0.190903	Mp20	0.0674229	0.0972823
FBgn0039597	44.9474	0.603966	0.282033	2.14147	0.0322358	0.191323	CG9997	0.526861	0.579213
FBgn0032181	56.1305	-0.504806	0.235826	-2.14059	0.0323074	0.191573	CG13133	0.366967	0.42336
FBgn0264006	11779.2	-0.232271	0.10852	-2.14035	0.0323266	0.191573	dysc	0.000577026	0.00178293
FBgn0037153	2404.46	-0.221283	0.103378	-2.14052	0.0323126	0.191573	olf413	0.000217451	0.000760789
FBgn0266719	617.667	-0.257748	0.120477	-2.13941	0.0324028	0.191928	stac	0.0033038	0.00805728
FBgn0265784	1959.95	-0.20437	0.0955721	-2.13838	0.0324855	0.192322	CrebB	3.41318e-05	0.000157185
FBgn0264513	11.2235	0.597834	0.279613	2.13807	0.0325107	0.192374	lncRNA:CR43912	0.518358	0.571036
FBgn0263144	2463.29	-0.194667	0.0911061	-2.13671	0.0326215	0.192933	bin3	9.17982e-06	5.18519e-05
FBgn0001092	2508.5	-0.19909	0.0931873	-2.13645	0.0326424	0.19296	Gapdh2	1.7303e-05	8.8804e-05
FBgn0036931	559.28	0.566532	0.265315	2.13532	0.0327351	0.193411	CG14183	0.472309	0.526852
FBgn0028740	21.2123	-0.610174	0.285838	-2.13469	0.0327865	0.193424	CG6362	0.535142	0.587058
FBgn0027575	1136.77	-0.215236	0.100825	-2.13475	0.0327817	0.193424	GABA-B-R2	0.000122705	0.000467588
FBgn0039052	42.4235	0.603897	0.282886	2.13477	0.0327799	0.193424	CG6733	0.526682	0.57907
[truncated: 9,795 more rows]

## Sheet: Pcl and OGT genes
FBgn0032066	LManIII
FBgn0039768	CG15533
FBgn0017424	asRNA:CR11538
FBgn0032839	AANATL3
FBgn0261575	tobi
FBgn0039519	Cyp6a18
FBgn0030594	fiz
FBgn0038658	CG14292
FBgn0038257	smp-30
FBgn0052656	Muc11A
FBgn0010241	Mdr50
FBgn0031432	Cyp309a1
FBgn0036996	mag
FBgn0038135
FBgn0035189	CG8773
FBgn0040349	CG9119
FBgn0043783	CG3699
FBgn0016684	CG32444
FBgn0032131	NaPi-T
FBgn0051104	CG3841
FBgn0040060	CG31104
FBgn0033294	yip7
FBgn0029091	Mal-A4
FBgn0040252	Chs2
FBgn0031653	Ugt303A1
FBgn0083936	Jon25Biii
FBgn0040350	Acp54A1
FBgn0004047	CG3690
FBgn0033047	Yp3
FBgn0051198	CG7882
FBgn0051233	CG31198
FBgn0051004	CG31233
FBgn0024289	mesh
FBgn0000079	Sodh-1
FBgn0039778	Amy-p
FBgn0085195	Jon99Fi
FBgn0036321	CG34166
FBgn0017448	CG14120
FBgn0036970	CG2187
FBgn0002565	Spn77Bc
FBgn0032435	Lsp2
FBgn0035620	Oatp33Eb
FBgn0000251	Alp9
FBgn0031517	cad
FBgn0038701	CG15406
FBgn0250841	CG18493
FBgn0265267	CG17242
FBgn0038136	CG18258
FBgn0015001	CG8774
FBgn0031522	iotaTry
FBgn0032187	CG3285
FBgn0032945	CG4839
FBgn0037973	CG8665
FBgn0039872	CG18547
FBgn0054040	salt
FBgn0039873	CG34040
FBgn0028516	Smvt
FBgn0035665	ZnT35C
FBgn0037801	Jon65Aiii
FBgn0030859	CG3999
FBgn0035941	CG12990
FBgn0033593	CG13313
FBgn0051872	Listericin
FBgn0025837	CG31872
FBgn0036969	CG17636
FBgn0032076	Spn77Bb
FBgn0034225	Argl
FBgn0032726	veil
FBgn0035154	CG10621
FBgn0038613	hiro
FBgn0030040	Vha100-4
FBgn0011555	CG15347
FBgn0259998	thetaTry
FBgn0004427	CG17571
FBgn0038160	LysD
FBgn0030993	CG9759
FBgn0031741	Mec2
FBgn0035661	CG11034
FBgn0264347	CG10477
FBgn0052282	lncRNA:CR43803
FBgn0050042	Drsl4
FBgn0030098	Cpr49Ab
FBgn0051901	CG12057
FBgn0261835	Mur29B
FBgn0011559	lncRNA:CR42767
FBgn0035619	Acp36DE
FBgn0085256	Alp10
FBgn0259101	CG34227
FBgn0031514	CG42249
FBgn0250757	OtopLb
FBgn0039094	CG42235
FBgn0035611	CG10184
FBgn0039787	CG13285
FBgn0051075	CG9702
FBgn0038845	CG31075
FBgn0030968	Alp5
FBgn0050395	CG7322
FBgn0039817	CG30395
FBgn0011770	CG15553
FBgn0030975	Gip
FBgn0043825	SdhBL
FBgn0031918	CG18284
FBgn0030828	CG6055
FBgn0028491	CG5162
FBgn0262945	CG2930
FBgn0034263	lncRNA:CR43264
FBgn0035273	CG10934
FBgn0053233	CG12020
FBgn0039077	CG33233
FBgn0022355	CG17380
FBgn0002855	Tsf1
FBgn0034416	Acp26Aa
FBgn0031128	CG15109
FBgn0000451	hydra
FBgn0010497	ect
FBgn0003888	dmGlut
FBgn0263199	betaTub60D
FBgn0250832	Galk
FBgn0034417	Dup99B
FBgn0035709	CG15117
FBgn0054034	eIF4E4
FBgn0036091	CG34034
FBgn0032820	CG18628
FBgn0039529	fbp
FBgn0050104	CG5612
FBgn0260396	NT5E-2
FBgn0262547	CG42521
FBgn0035670	CG43101
FBgn0034816	CG10472
FBgn0042201	CG3085
FBgn0051313	Nplp3
FBgn0036824	CG31313
FBgn0010504	CG3902
FBgn0261287	kermit
FBgn0036549	ymp
FBgn0038938	CG10516
FBgn0015039	CG7084
FBgn0038631	Cyp9b2
FBgn0039478	CG7695
FBgn0029155	Nep5
FBgn0052351	Men-b
FBgn0029932	S-Lap2
FBgn0023477	CG4607
FBgn0038147	Taldo
FBgn0086254	CCHa2
FBgn0000053	Akr1B
FBgn0005626	Gart
FBgn0030932	ple
FBgn0039203	Ggt-1
FBgn0002719	CG13618
FBgn0001125	Men
FBgn0020236	Got2
FBgn0043364	ATPCL
FBgn0264607	cbt
FBgn0053653	CaMKII
FBgn0003499	Cadps
FBgn0036926	sr
FBgn0046706	CG7646
FBgn0259216	Haspin
FBgn0031461	RhoGAP102A
FBgn0262855	daw
FBgn0013307	CG43219
FBgn0030041	Odc1
FBgn0086603	CG12116
FBgn0043791	snoRNA:Or-CD2
FBgn0031805	phu
FBgn0035282	Nepl4
FBgn0032069	CNMa
FBgn0002571	LManVI
FBgn0038719	Mal-A3
FBgn0028534	CG16727
FBgn0002569	CG7916
FBgn0030999	Mal-A2
FBgn0033296	Mur18B
FBgn0050360	Mal-A7
FBgn0033733	Mal-A6
FBgn0034247	CG8834
FBgn0002570	CG6484
FBgn0039471	Mal-A1
FBgn0033297	CG6295
FBgn0036738	Mal-A8
FBgn0035926	CG7542
FBgn0032235	Acbp5
FBgn0038973	CG5096
FBgn0051288	Pebp1
FBgn0019928	CG31288
FBgn0024361	Ser8
FBgn0034663	Tsp2A
FBgn0030148	CG4363
FBgn0052054	CG3106
FBgn0002939	CG32054
FBgn0052053	ninaD
FBgn0039312	CG32053
FBgn0033792	CG10514
FBgn0041156	CG13325
FBgn0003357	exex
FBgn0035679	Jon99Ciii
FBgn0033093	CG10467
FBgn0032074	CG3270
FBgn0053966	Tsp29Fa
FBgn0037386	CG33966
FBgn0034865	CG1208
FBgn0034289	Or59b
FBgn0020912	CG10910
FBgn0036205	Ptx1
FBgn0031418	CG14131
FBgn0033826	CG3609
FBgn0061356	CG4734
FBgn0264750	CG18003
FBgn0030748	CG44008
FBgn0001089	Traf-like
FBgn0267408	Gal
FBgn0026565	AOX1
FBgn0040256	Ass
FBgn0028920	Ugt35C1
FBgn0052107	CG8997
FBgn0032889	CG32107
FBgn0036599	CG9331
FBgn0010387	CG13044
FBgn0036857	Acbp2
FBgn0038262	Aldh7A1
FBgn0036995	CG14857
FBgn0040299	atk
FBgn0034733	Myo28B1
FBgn0264776	CG4752
FBgn0034390	CG44014
FBgn0039941	CG15093
FBgn0027584	CG17167
FBgn0035968	CG4757
FBgn0039324	Slc45-1
FBgn0037714	CG10553
FBgn0038652	CG9396
FBgn0024997	CG7720
FBgn0029896	CG2681
FBgn0037354	CG3168
FBgn0012037	CG12171
FBgn0027556	Ance
FBgn0085484	CG4928
FBgn0001187	Pdxk
FBgn0032779	Hex-C
FBgn0261534	Alp12
FBgn0036551	l(2)34Fc
FBgn0022359	CG17029
FBgn0037090	Sodh-2
FBgn0263200	Est-Q
FBgn0010226	Galt
FBgn0038799	GstS1
FBgn0033079	MFS9
FBgn0037607	Fmo-2
FBgn0030362	CG8036
FBgn0031801	regucalcin
FBgn0032285	CG9498
FBgn0039084	CG17108
FBgn0036945	CG10175
FBgn0051673	Ssk
FBgn0027073	CG31673
FBgn0039006	Ugt49B1
FBgn0026061	Cyp6d4
FBgn0035359	Mipp1
FBgn0038924	CG1143
FBgn0036665	CG6028
FBgn0038681	CG13024
FBgn0040507	Cyp12a4
FBgn0031012	ACXD
FBgn0262035	CG8051
FBgn0000592	CG42846
FBgn0030747	Est-6
FBgn0033777	CG4301
FBgn0025678	CG17574
FBgn0025454	CaBP1
FBgn0050410	Cyp6g1
FBgn0030484	Rpi
FBgn0036770	GstT4
FBgn0034999	Prestin
FBgn0039562	Fatp3
FBgn0023507	Gp93
FBgn0263598	D2hgdh
FBgn0031824	Vha68-2
FBgn0051974	CG9547
FBgn0034628	CG31974
FBgn0031360	Acox57D-p
FBgn0038179	CG31937
FBgn0035147	CG9312
FBgn0029766	Gale
FBgn0028886	CG15784
FBgn0035544	CG15279
FBgn0035484	CG15021
FBgn0034997	CG11594
FBgn0030893	CG3376
FBgn0034716	RhoGAP16F
FBgn0087007	Oatp58Dc
FBgn0016123	bbg
FBgn0000455	Alp4
FBgn0039856	Dip-C
FBgn0033387	CG1774
FBgn0261673	CG8008
FBgn0028540	nemy
FBgn0003308	CG9008
FBgn0035978	ry
FBgn0035298	UGP
FBgn0036759	SCOT
FBgn0000454	CG5577
FBgn0040064	Dip-B
FBgn0030038	yip2
FBgn0025620	CG1440
FBgn0010341	CG13360
FBgn0015268	Cdc42
FBgn0037021	Nap1
FBgn0020372	CG11399
FBgn0263118	TM4SF
FBgn0051781	tx
FBgn0052406	lncRNA:CR31781
FBgn0260798	PVRAP
FBgn0019660	Gprk1
FBgn0261089	lncRNA:roX2
FBgn0037877	Sytalpha
FBgn0003256	CG6689
FBgn0019940	rl
FBgn0260657	Rh6
FBgn0039911	CG42540
FBgn0037206	CG1909
FBgn0069969	CG12768
FBgn0004395	CG40498
FBgn0266429	unk
FBgn0033132	AstA-R1
FBgn0004187	Tsp42Ej
FBgn0267429	snRNA:U1:95Cc
FBgn0038880	lovit
FBgn0032741	SIFaR
FBgn0259219	Sidpn
FBgn0263780	CG42319
FBgn0264617	CG17684
FBgn0043853	asRNA:CR43957
FBgn0265084	scaRNA:MeU5-C46
FBgn0034290	CG44195
FBgn0031542	CG5773
FBgn0037171	CG15414
FBgn0031650	CG14459
FBgn0083987	CG14044
FBgn0263519	snRNA:U11
FBgn0265913	mir-4964
FBgn0263018	lncRNA:CR44702
	snRNA:U4atac

## Sheet: OGT PRE cis-overlaps
target	reference	overlap_size	overlap_enrichment	log2_enrichment	pval
OGTsharedPRE.bed	Trl_2.gff	38	3.926	1.973	0.009901
OGTsharedPRE.bed	Trl.gff	38	3.722	1.896	0.009901
OGTsharedPRE.bed	sr_8.gff	27	2.766	1.468	0.009901
OGTsharedPRE.bed	crol.gff	23	2.632	1.396	0.009901
OGTsharedPRE.bed	FBgn0262139_2.gff	26	2.554	1.353	0.009901
OGTsharedPRE.bed	CG7368_4.gff	18	2.514	1.33	0.009901
OGTsharedPRE.bed	Aef1_2.gff	19	2.225	1.154	0.009901
OGTsharedPRE.bed	CG5669_23.gff	17	2.163	1.113	0.009901
OGTsharedPRE.bed	CG7368_2.gff	16	2.142	1.099	0.019802
OGTsharedPRE.bed	CG5669_22.gff	19	2.128	1.089	0.009901
OGTsharedPRE.bed	CG7368_3.gff	20	2.128	1.089	0.009901
OGTsharedPRE.bed	Blimp-1.gff	27	2.091	1.064	0.009901
OGTsharedPRE.bed	sfmbt.gff	34	2.042	1.03	0.009901
OGTsharedPRE.bed	sr_13.gff	24	2.03	1.022	0.009901
OGTsharedPRE.bed	Sp1_23.gff	17	1.984	0.988	0.009901
OGTsharedPRE.bed	Sp1_20.gff	20	1.953	0.966	0.009901
OGTsharedPRE.bed	sr_30.gff	26	1.952	0.965	0.009901
OGTsharedPRE.bed	CG5669_20.gff	20	1.94	0.956	0.009901
OGTsharedPRE.bed	Poxn_10.gff	31	1.936	0.953	0.009901
OGTsharedPRE.bed	sr_28.gff	27	1.926	0.945	0.009901
OGTsharedPRE.bed	sr_15.gff	24	1.914	0.936	0.009901
OGTsharedPRE.bed	slp2_19.gff	22	1.905	0.93	0.009901
OGTsharedPRE.bed	Sp1_22.gff	19	1.904	0.929	0.009901
OGTsharedPRE.bed	sr_11.gff	28	1.893	0.921	0.009901
OGTsharedPRE.bed	Sp1_6.gff	23	1.876	0.908	0.009901
OGTsharedPRE.bed	sv_13.gff	31	1.877	0.908	0.009901
OGTsharedPRE.bed	FBgn0263239_19.gff	26	1.862	0.897	0.009901
OGTsharedPRE.bed	Adf1_2.gff	26	1.861	0.896	0.009901
OGTsharedPRE.bed	Sp1_19.gff	23	1.859	0.895	0.009901
OGTsharedPRE.bed	CG5669_6.gff	23	1.853	0.89	0.009901
OGTsharedPRE.bed	fd96Ca_17.gff	22	1.849	0.887	0.009901
OGTsharedPRE.bed	bin_17.gff	28	1.847	0.885	0.009901
OGTsharedPRE.bed	fkh_38.gff	28	1.835	0.876	0.009901
OGTsharedPRE.bed	Adf1.gff	16	1.833	0.874	0.019802
OGTsharedPRE.bed	CG9571_18.gff	22	1.832	0.873	0.009901
OGTsharedPRE.bed	fd59A_44.gff	28	1.83	0.872	0.009901
OGTsharedPRE.bed	fd64A_20.gff	22	1.821	0.865	0.009901
OGTsharedPRE.bed	Poxn_3.gff	28	1.822	0.865	0.009901
OGTsharedPRE.bed	CG11152_97.gff	23	1.82	0.864	0.009901
OGTsharedPRE.bed	croc_21.gff	22	1.814	0.859	0.009901
OGTsharedPRE.bed	fkh_85.gff	23	1.814	0.859	0.009901
OGTsharedPRE.bed	CG11152_19.gff	22	1.812	0.858	0.009901
OGTsharedPRE.bed	CG5669_19.gff	23	1.812	0.858	0.009901
OGTsharedPRE.bed	fkh_17.gff	22	1.812	0.858	0.009901
OGTsharedPRE.bed	croc_94.gff	23	1.805	0.852	0.009901
OGTsharedPRE.bed	fd96Cb_38.gff	28	1.803	0.85	0.009901
OGTsharedPRE.bed	fd96Ca_41.gff	28	1.799	0.848	0.009901
OGTsharedPRE.bed	fd59A_19.gff	22	1.793	0.842	0.009901
OGTsharedPRE.bed	CG9571_50.gff	27	1.79	0.84	0.009901
OGTsharedPRE.bed	slp1_19.gff	22	1.79	0.84	0.019802
OGTsharedPRE.bed	sv_6.gff	28	1.787	0.837	0.009901
OGTsharedPRE.bed	slp2_47.gff	28	1.783	0.835	0.009901
OGTsharedPRE.bed	Sp1_9.gff	23	1.782	0.833	0.019802
OGTsharedPRE.bed	ss_4.gff	29	1.78	0.832	0.009901
OGTsharedPRE.bed	FBgn0261705_20.gff	26	1.778	0.831	0.009901
OGTsharedPRE.bed	CG9571_87.gff	23	1.777	0.83	0.009901
OGTsharedPRE.bed	bin_38.gff	23	1.775	0.828	0.009901
OGTsharedPRE.bed	slp2_12.gff	25	1.768	0.822	0.009901
OGTsharedPRE.bed	slp1_97.gff	23	1.762	0.818	0.009901
OGTsharedPRE.bed	fd64A_43.gff	28	1.759	0.815	0.009901
OGTsharedPRE.bed	fd64A_54.gff	27	1.759	0.815	0.009901
OGTsharedPRE.bed	CG9571_40.gff	28	1.758	0.814	0.009901
OGTsharedPRE.bed	fd64A_91.gff	23	1.756	0.812	0.009901
OGTsharedPRE.bed	CG11152_47.gff	28	1.753	0.81	0.009901
OGTsharedPRE.bed	sr_17.gff	24	1.753	0.81	0.009901
OGTsharedPRE.bed	FBgn0262477_5.gff	23	1.741	0.8	0.019802
OGTsharedPRE.bed	croc_44.gff	28	1.737	0.797	0.009901
OGTsharedPRE.bed	FBgn0263239_7.gff	21	1.737	0.797	0.009901
OGTsharedPRE.bed	slp2_60.gff	27	1.737	0.797	0.009901
OGTsharedPRE.bed	sr_18.gff	27	1.736	0.796	0.009901
OGTsharedPRE.bed	Blimp-1_2.gff	26	1.734	0.795	0.009901
OGTsharedPRE.bed	slp2_97.gff	23	1.735	0.795	0.009901
OGTsharedPRE.bed	Fer1_5.gff	28	1.728	0.789	0.009901
OGTsharedPRE.bed	CG5669_9.gff	23	1.724	0.786	0.009901
OGTsharedPRE.bed	fd59A_95.gff	23	1.724	0.786	0.009901
OGTsharedPRE.bed	fd59A_56.gff	27	1.723	0.785	0.009901
OGTsharedPRE.bed	croc_13.gff	25	1.721	0.783	0.009901
OGTsharedPRE.bed	slp1_60.gff	27	1.721	0.783	0.009901
OGTsharedPRE.bed	Fer3_5.gff	28	1.715	0.778	0.009901
OGTsharedPRE.bed	fkh_49.gff	27	1.714	0.778	0.009901
OGTsharedPRE.bed	fd96Cb_49.gff	27	1.713	0.777	0.009901
OGTsharedPRE.bed	fd96Cb_85.gff	23	1.714	0.777	0.009901
OGTsharedPRE.bed	fd96Ca_11.gff	25	1.706	0.771	0.009901
OGTsharedPRE.bed	slp1_47.gff	28	1.705	0.77	0.009901
OGTsharedPRE.bed	CG11152_60.gff	27	1.701	0.767	0.009901
OGTsharedPRE.bed	bin_22.gff	27	1.698	0.764	0.009901
OGTsharedPRE.bed	fd59A_76.gff	25	1.689	0.756	0.009901
OGTsharedPRE.bed	fd96Ca_87.gff	23	1.689	0.756	0.019802
OGTsharedPRE.bed	fkh_11.gff	25	1.688	0.755	0.009901
OGTsharedPRE.bed	fd64A_12.gff	25	1.687	0.754	0.009901
OGTsharedPRE.bed	sr_24.gff	27	1.686	0.754	0.009901
OGTsharedPRE.bed	slp1_78.gff	25	1.686	0.753	0.019802
OGTsharedPRE.bed	fd96Cb_11.gff	25	1.685	0.752	0.009901
OGTsharedPRE.bed	croc_35.gff	26	1.682	0.75	0.009901
OGTsharedPRE.bed	fd96Ca_71.gff	25	1.682	0.75	0.009901
OGTsharedPRE.bed	fd96Ca_10.gff	23	1.678	0.746	0.009901
OGTsharedPRE.bed	fd59A_34.gff	26	1.677	0.746	0.019802
OGTsharedPRE.bed	fd96Ca_53.gff	27	1.672	0.741	0.009901
OGTsharedPRE.bed	CrebB-17A_2.gff	24	1.667	0.737	0.009901
OGTsharedPRE.bed	FBgn0261705_8.gff	21	1.667	0.737	0.009901
OGTsharedPRE.bed	fd64A_34.gff	26	1.667	0.737	0.009901
OGTsharedPRE.bed	fd64A_72.gff	25	1.667	0.737	0.019802
OGTsharedPRE.bed	slp2_36.gff	26	1.663	0.734	0.009901
OGTsharedPRE.bed	CG9571_12.gff	25	1.662	0.733	0.009901
OGTsharedPRE.bed	FBgn0261705_18.gff	25	1.661	0.732	0.009901
OGTsharedPRE.bed	slp1_36.gff	26	1.661	0.732	0.009901
OGTsharedPRE.bed	fkh_31.gff	26	1.66	0.731	0.009901
OGTsharedPRE.bed	bin_4.gff	25	1.658	0.729	0.009901
OGTsharedPRE.bed	Fer2_5.gff	28	1.658	0.729	0.009901
OGTsharedPRE.bed	fd96Ca_33.gff	26	1.657	0.729	0.019802
OGTsharedPRE.bed	Sp1_7.gff	20	1.654	0.726	0.009901
OGTsharedPRE.bed	croc_2.gff	24	1.653	0.725	0.009901
OGTsharedPRE.bed	srp_29.gff	16	1.653	0.725	0.019802
OGTsharedPRE.bed	croc_55.gff	27	1.649	0.722	0.019802
OGTsharedPRE.bed	CG5669_3.gff	23	1.649	0.721	0.019802
OGTsharedPRE.bed	FBgn0261963_2.gff	25	1.648	0.721	0.019802
OGTsharedPRE.bed	fd96Cb_31.gff	26	1.648	0.72	0.009901
OGTsharedPRE.bed	slp1_12.gff	25	1.647	0.72	0.009901
OGTsharedPRE.bed	CG9571_31.gff	26	1.646	0.719	0.009901
OGTsharedPRE.bed	sr_10.gff	26	1.643	0.717	0.019802
OGTsharedPRE.bed	CG11152_36.gff	26	1.639	0.713	0.009901
OGTsharedPRE.bed	fkh_69.gff	25	1.638	0.712	0.009901
OGTsharedPRE.bed	fd59A_12.gff	25	1.638	0.712	0.019802
OGTsharedPRE.bed	ci_5.gff	26	1.635	0.709	0.019802
OGTsharedPRE.bed	srp_33.gff	26	1.635	0.709	0.019802
OGTsharedPRE.bed	srp_28.gff	25	1.633	0.707	0.009901
OGTsharedPRE.bed	CG11152_78.gff	25	1.628	0.703	0.009901
OGTsharedPRE.bed	croc_75.gff	25	1.625	0.701	0.019802
OGTsharedPRE.bed	Blimp-1_3.gff	25	1.624	0.7	0.019802
OGTsharedPRE.bed	bin_32.gff	25	1.623	0.699	0.009901
OGTsharedPRE.bed	slp2_78.gff	25	1.622	0.698	0.009901
OGTsharedPRE.bed	rn_2.gff	18	1.616	0.692	0.019802
OGTsharedPRE.bed	CG9571_68.gff	25	1.612	0.689	0.019802
OGTsharedPRE.bed	fd96Cb_53.gff	23	1.605	0.683	0.009901
OGTsharedPRE.bed	fd96Ca_57.gff	23	1.604	0.682	0.009901
OGTsharedPRE.bed	fd96Cb_69.gff	25	1.605	0.682	0.009901
OGTsharedPRE.bed	slp2_38.gff	17	1.602	0.68	0.009901
OGTsharedPRE.bed	slp2_64.gff	23	1.602	0.68	0.019802
OGTsharedPRE.bed	FBgn0263239_17.gff	25	1.602	0.679	0.009901
OGTsharedPRE.bed	Adf1_3.gff	25	1.601	0.679	0.019802
OGTsharedPRE.bed	Sp1_3.gff	23	1.598	0.677	0.009901
OGTsharedPRE.bed	slp1_94.gff	28	1.597	0.676	0.009901
OGTsharedPRE.bed	fd64A_11.gff	23	1.595	0.674	0.009901
OGTsharedPRE.bed	slp1_11.gff	23	1.595	0.674	0.009901
OGTsharedPRE.bed	sr_12.gff	25	1.595	0.674	0.019802
OGTsharedPRE.bed	CG9571_11.gff	23	1.593	0.672	0.009901
OGTsharedPRE.bed	sr_21.gff	24	1.592	0.67	0.009901
OGTsharedPRE.bed	da_20.gff	24	1.592	0.67	0.019802
OGTsharedPRE.bed	fd59A_92.gff	28	1.584	0.663	0.009901
OGTsharedPRE.bed	CG11152_11.gff	23	1.583	0.663	0.019802
OGTsharedPRE.bed	fd96Cb_78.gff	21	1.581	0.661	0.009901
OGTsharedPRE.bed	sr_4.gff	21	1.58	0.66	0.009901
OGTsharedPRE.bed	Poxm_9.gff	25	1.579	0.659	0.019802
OGTsharedPRE.bed	fkh_53.gff	23	1.578	0.658	0.019802
OGTsharedPRE.bed	CG9571_54.gff	23	1.576	0.657	0.009901
OGTsharedPRE.bed	fd96Cb_10.gff	23	1.575	0.656	0.009901
OGTsharedPRE.bed	FBgn0262477_4.gff	24	1.575	0.655	0.009901
OGTsharedPRE.bed	croc_87.gff	21	1.572	0.652	0.019802
OGTsharedPRE.bed	slp1_64.gff	23	1.571	0.652	0.019802
OGTsharedPRE.bed	CG9571_84.gff	28	1.57	0.651	0.019802
OGTsharedPRE.bed	sr_6.gff	23	1.569	0.65	0.009901
OGTsharedPRE.bed	sv_12.gff	26	1.566	0.647	0.019802
OGTsharedPRE.bed	da_9.gff	25	1.564	0.646	0.009901
OGTsharedPRE.bed	fd59A_11.gff	23	1.565	0.646	0.009901
OGTsharedPRE.bed	CG11152_64.gff	23	1.56	0.642	0.009901
OGTsharedPRE.bed	Poxn_9.gff	26	1.56	0.641	0.009901
OGTsharedPRE.bed	brk.gff	22	1.555	0.637	0.009901
OGTsharedPRE.bed	CG9571_47.gff	24	1.555	0.637	0.019802
OGTsharedPRE.bed	fd64A_62.gff	31	1.553	0.635	0.009901
OGTsharedPRE.bed	croc_52.gff	24	1.552	0.634	0.009901
OGTsharedPRE.bed	fd64A_84.gff	21	1.552	0.634	0.009901
OGTsharedPRE.bed	foxo_12.gff	24	1.552	0.634	0.009901
OGTsharedPRE.bed	slp2_57.gff	24	1.551	0.634	0.009901
OGTsharedPRE.bed	Sp1_11.gff	24	1.551	0.634	0.019802
OGTsharedPRE.bed	slp1_90.gff	21	1.551	0.633	0.019802
OGTsharedPRE.bed	fd59A_88.gff	21	1.55	0.632	0.009901
OGTsharedPRE.bed	ss.gff	27	1.55	0.632	0.009901
OGTsharedPRE.bed	brk_2.gff	22	1.547	0.63	0.009901
OGTsharedPRE.bed	ci_4.gff	25	1.547	0.63	0.009901
OGTsharedPRE.bed	dpn_3.gff	25	1.548	0.63	0.009901
OGTsharedPRE.bed	fd96Ca_49.gff	24	1.547	0.63	0.009901
OGTsharedPRE.bed	croc_59.gff	23	1.546	0.628	0.019802
OGTsharedPRE.bed	slp2_11.gff	23	1.546	0.628	0.019802
OGTsharedPRE.bed	CG9571_34.gff	23	1.544	0.626	0.019802
OGTsharedPRE.bed	croc_12.gff	23	1.544	0.626	0.019802
OGTsharedPRE.bed	croc_38.gff	23	1.543	0.625	0.009901
OGTsharedPRE.bed	slp1_68.gff	31	1.542	0.625	0.009901
OGTsharedPRE.bed	FBgn0261963_6.gff	23	1.542	0.624	0.009901
OGTsharedPRE.bed	fd96Ca_73.gff	32	1.541	0.624	0.009901
OGTsharedPRE.bed	CG11152_55.gff	24	1.54	0.623	0.009901
OGTsharedPRE.bed	fd96Cb_59.gff	31	1.54	0.623	0.009901
OGTsharedPRE.bed	slp2_94.gff	28	1.54	0.623	0.009901
OGTsharedPRE.bed	fd96Cb_46.gff	24	1.538	0.621	0.009901
OGTsharedPRE.bed	fd64A_108.gff	23	1.537	0.621	0.019802
OGTsharedPRE.bed	twi.gff	24	1.537	0.621	0.019802
OGTsharedPRE.bed	fd96Ca_65.gff	23	1.535	0.619	0.009901
OGTsharedPRE.bed	slp1_55.gff	24	1.535	0.618	0.009901
OGTsharedPRE.bed	CG11152_75.gff	22	1.534	0.617	0.009901
OGTsharedPRE.bed	CG5669_15.gff	24	1.534	0.617	0.019802
OGTsharedPRE.bed	sr_9.gff	24	1.533	0.616	0.009901
OGTsharedPRE.bed	fd64A_51.gff	24	1.532	0.615	0.019802
OGTsharedPRE.bed	fd64A_88.gff	28	1.529	0.613	0.009901
OGTsharedPRE.bed	fd59A_57.gff	23	1.527	0.611	0.009901
OGTsharedPRE.bed	fd59A_52.gff	24	1.527	0.61	0.019802
OGTsharedPRE.bed	fkh_59.gff	31	1.525	0.609	0.009901
OGTsharedPRE.bed	slp2_68.gff	31	1.526	0.609	0.009901
OGTsharedPRE.bed	sv_3.gff	25	1.525	0.609	0.009901
OGTsharedPRE.bed	CG11152_37.gff	28	1.525	0.609	0.019802
OGTsharedPRE.bed	fd59A_38.gff	23	1.519	0.603	0.009901
OGTsharedPRE.bed	fd96Ca_34.gff	28	1.519	0.603	0.009901
OGTsharedPRE.bed	fd96Ca_84.gff	28	1.519	0.603	0.009901
OGTsharedPRE.bed	fd96Ca_50.gff	24	1.519	0.603	0.019802
OGTsharedPRE.bed	croc_91.gff	28	1.518	0.602	0.009901
OGTsharedPRE.bed	slp1_43.gff	21	1.517	0.602	0.019802
OGTsharedPRE.bed	croc_65.gff	31	1.517	0.601	0.009901
OGTsharedPRE.bed	CrebB-17A_3.gff	24	1.516	0.6	0.019802
OGTsharedPRE.bed	foxo_26.gff	22	1.516	0.6	0.019802
OGTsharedPRE.bed	FBgn0262975.gff	25	1.514	0.599	0.009901
OGTsharedPRE.bed	fd96Ca_61.gff	31	1.515	0.599	0.009901
OGTsharedPRE.bed	slp1_72.gff	23	1.514	0.599	0.009901
OGTsharedPRE.bed	slp1_41.gff	23	1.515	0.599	0.019802
OGTsharedPRE.bed	slp2_72.gff	23	1.514	0.599	0.019802
OGTsharedPRE.bed	CG9571_58.gff	31	1.514	0.598	0.009901
OGTsharedPRE.bed	fd59A_66.gff	31	1.512	0.597	0.019802
OGTsharedPRE.bed	Sp1_15.gff	24	1.511	0.596	0.019802
OGTsharedPRE.bed	slp1_80.gff	32	1.511	0.595	0.009901
OGTsharedPRE.bed	sr_27.gff	23	1.51	0.595	0.019802
OGTsharedPRE.bed	sv_11.gff	25	1.511	0.595	0.019802
OGTsharedPRE.bed	fd96Cb_34.gff	23	1.508	0.593	0.019802
OGTsharedPRE.bed	croc_111.gff	23	1.507	0.592	0.019802
OGTsharedPRE.bed	fkh_46.gff	24	1.508	0.592	0.019802
OGTsharedPRE.bed	fd59A_112.gff	23	1.505	0.59	0.009901
OGTsharedPRE.bed	bin_29.gff	22	1.504	0.589	0.009901
OGTsharedPRE.bed	bin_21.gff	24	1.505	0.589	0.019802
OGTsharedPRE.bed	FBgn0261705_10.gff	24	1.505	0.589	0.019802
OGTsharedPRE.bed	slp1_37.gff	28	1.503	0.588	0.009901
OGTsharedPRE.bed	croc_43.gff	24	1.502	0.587	0.019802
OGTsharedPRE.bed	slp2_37.gff	28	1.501	0.586	0.009901
OGTsharedPRE.bed	croc_49.gff	21	1.498	0.583	0.019802
OGTsharedPRE.bed	fd64A_53.gff	22	1.498	0.583	0.019802
OGTsharedPRE.bed	CG11152_94.gff	28	1.497	0.582	0.009901
OGTsharedPRE.bed	FBgn0261705_16.gff	23	1.496	0.582	0.019802
OGTsharedPRE.bed	fd96Cb_82.gff	28	1.497	0.582	0.019802
OGTsharedPRE.bed	bin_43.gff	23	1.492	0.577	0.009901
OGTsharedPRE.bed	CG11152_57.gff	24	1.491	0.576	0.019802
OGTsharedPRE.bed	fd96Cb_50.gff	23	1.491	0.576	0.019802
OGTsharedPRE.bed	fd96Cb_63.gff	23	1.491	0.576	0.019802
OGTsharedPRE.bed	fd64A_48.gff	21	1.487	0.573	0.009901
OGTsharedPRE.bed	fkh_50.gff	23	1.488	0.573	0.009901
OGTsharedPRE.bed	slp1_57.gff	24	1.487	0.572	0.019802
OGTsharedPRE.bed	fd64A_102.gff	22	1.483	0.569	0.019802
OGTsharedPRE.bed	fd96Ca_54.gff	23	1.484	0.569	0.019802
OGTsharedPRE.bed	fd96Ca_16.gff	22	1.482	0.568	0.019802
OGTsharedPRE.bed	CG11152_80.gff	32	1.481	0.567	0.009901
OGTsharedPRE.bed	fkh_82.gff	28	1.481	0.567	0.009901
OGTsharedPRE.bed	FBgn0263239_8.gff	23	1.481	0.567	0.019802
OGTsharedPRE.bed	bin_34.gff	32	1.479	0.565	0.009901
OGTsharedPRE.bed	br_13.gff	23	1.478	0.564	0.019802
OGTsharedPRE.bed	slp1_46.gff	24	1.477	0.563	0.009901
OGTsharedPRE.bed	fkh_63.gff	23	1.473	0.559	0.019802
OGTsharedPRE.bed	fd96Cb_71.gff	32	1.471	0.556	0.009901
OGTsharedPRE.bed	fkh_71.gff	32	1.469	0.555	0.009901
OGTsharedPRE.bed	foxo_7.gff	23	1.468	0.554	0.009901
OGTsharedPRE.bed	slp2_80.gff	32	1.469	0.554	0.009901
OGTsharedPRE.bed	CTCF.gff	22	1.467	0.553	0.019802
OGTsharedPRE.bed	FBgn0263239_5.gff	23	1.465	0.551	0.009901
OGTsharedPRE.bed	foxo_24.gff	31	1.465	0.551	0.019802
OGTsharedPRE.bed	fd96Ca_98.gff	22	1.463	0.549	0.019802
OGTsharedPRE.bed	fd96Ca_46.gff	21	1.461	0.547	0.019802
OGTsharedPRE.bed	CG9571_70.gff	32	1.459	0.545	0.009901
OGTsharedPRE.bed	fd64A_74.gff	32	1.459	0.545	0.009901
OGTsharedPRE.bed	CrebB-17A_9.gff	24	1.459	0.545	0.019802
OGTsharedPRE.bed	croc_77.gff	32	1.457	0.543	0.009901
OGTsharedPRE.bed	fd59A_78.gff	32	1.457	0.543	0.009901
OGTsharedPRE.bed	slp1_106.gff	31	1.457	0.543	0.009901
OGTsharedPRE.bed	croc_101.gff	21	1.455	0.541	0.009901
OGTsharedPRE.bed	BRC1_DROME_13.gff	23	1.454	0.54	0.019802
OGTsharedPRE.bed	CG9571_96.gff	31	1.453	0.539	0.019802
OGTsharedPRE.bed	foxo_21.gff	31	1.44	0.526	0.009901
OGTsharedPRE.bed	croc_40.gff	21	1.438	0.524	0.019802
OGTsharedPRE.bed	fd64A_100.gff	31	1.437	0.523	0.009901
OGTsharedPRE.bed	Eip74EF_16.gff	23	1.436	0.522	0.019802
OGTsharedPRE.bed	fd96Cb_94.gff	31	1.435	0.521	0.009901
OGTsharedPRE.bed	CTCF_3.gff	21	1.432	0.519	0.019802
OGTsharedPRE.bed	fkh_94.gff	31	1.432	0.518	0.009901
OGTsharedPRE.bed	CG11152_17.gff	22	1.429	0.515	0.019802
OGTsharedPRE.bed	fd59A_104.gff	31	1.427	0.513	0.009901
OGTsharedPRE.bed	fd96Ca_96.gff	31	1.427	0.513	0.019802
OGTsharedPRE.bed	fkh_73.gff	27	1.421	0.507	0.009901
OGTsharedPRE.bed	slp2_106.gff	31	1.421	0.507	0.019802
OGTsharedPRE.bed	Sp1_17.gff	22	1.421	0.507	0.019802
OGTsharedPRE.bed	srp_22.gff	22	1.418	0.504	0.009901
OGTsharedPRE.bed	fd96Cb_16.gff	22	1.418	0.504	0.019802
OGTsharedPRE.bed	Scr_37.gff	23	1.416	0.502	0.019802
OGTsharedPRE.bed	fd59A_55.gff	22	1.414	0.5	0.019802
OGTsharedPRE.bed	croc_17.gff	30	1.411	0.497	0.019802
OGTsharedPRE.bed	slp1_104.gff	21	1.41	0.496	0.019802
OGTsharedPRE.bed	bi_19.gff	22	1.408	0.494	0.019802
OGTsharedPRE.bed	abd-A_37.gff	23	1.407	0.492	0.019802
OGTsharedPRE.bed	fd96Cb_95.gff	21	1.405	0.49	0.019802
OGTsharedPRE.bed	fd64A_76.gff	27	1.399	0.484	0.009901
OGTsharedPRE.bed	slp1_85.gff	27	1.387	0.472	0.019802
OGTsharedPRE.bed	fd96Cb_48.gff	22	1.378	0.462	0.019802
OGTsharedPRE.bed	CG9571_72.gff	27	1.373	0.458	0.019802
OGTsharedPRE.bed	fkh_76.gff	27	1.347	0.43	0.019802
OGTsharedPRE.bed	fkh_55.gff	29	1.312	0.392	0.019802

## Sheet: All cis-overlaps
target	reference	overlap_size	overlap_enrichment	log2_enrichment	pval
OGTsharedPRE.bed	Trl_2.gff	38	3.926	1.973	0.009901
OGTsharedPRE.bed	Trl.gff	38	3.722	1.896	0.009901
OGTsharedPRE.bed	sr_8.gff	27	2.766	1.468	0.009901
OGTsharedPRE.bed	crol.gff	23	2.632	1.396	0.009901
OGTsharedPRE.bed	FBgn0262139_2.gff	26	2.554	1.353	0.009901
OGTsharedPRE.bed	CG7368_4.gff	18	2.514	1.33	0.009901
OGTsharedPRE.bed	Aef1_2.gff	19	2.225	1.154	0.009901
OGTsharedPRE.bed	CG5669_23.gff	17	2.163	1.113	0.009901
OGTsharedPRE.bed	CG7368_2.gff	16	2.142	1.099	0.019802
OGTsharedPRE.bed	CG5669_22.gff	19	2.128	1.089	0.009901
OGTsharedPRE.bed	CG7368_3.gff	20	2.128	1.089	0.009901
OGTsharedPRE.bed	Blimp-1.gff	27	2.091	1.064	0.009901
OGTsharedPRE.bed	sfmbt.gff	34	2.042	1.03	0.009901
OGTsharedPRE.bed	sr_13.gff	24	2.03	1.022	0.009901
sharedOGTandPcl.bed	PhoRC2.gff	53	2.024	1.018	0.009901
OGTsharedPRE.bed	Sp1_23.gff	17	1.984	0.988	0.009901
OGTsharedPRE.bed	Sp1_20.gff	20	1.953	0.966	0.009901
OGTsharedPRE.bed	sr_30.gff	26	1.952	0.965	0.009901
OGTsharedPRE.bed	CG5669_20.gff	20	1.94	0.956	0.009901
OGTsharedPRE.bed	Poxn_10.gff	31	1.936	0.953	0.009901
OGTsharedPRE.bed	sr_28.gff	27	1.926	0.945	0.009901
OGTsharedPRE.bed	sr_15.gff	24	1.914	0.936	0.009901
sharedOGTandPcl.bed	PhoRC22.gff	39	1.91	0.933	0.009901
OGTsharedPRE.bed	slp2_19.gff	22	1.905	0.93	0.009901
OGTsharedPRE.bed	Sp1_22.gff	19	1.904	0.929	0.009901
OGTsharedPRE.bed	sr_11.gff	28	1.893	0.921	0.009901
OGTsharedPRE.bed	Sp1_6.gff	23	1.876	0.908	0.009901
OGTsharedPRE.bed	sv_13.gff	31	1.877	0.908	0.009901
OGTsharedPRE.bed	FBgn0263239_19.gff	26	1.862	0.897	0.009901
OGTsharedPRE.bed	Adf1_2.gff	26	1.861	0.896	0.009901
OGTsharedPRE.bed	Sp1_19.gff	23	1.859	0.895	0.009901
OGTsharedPRE.bed	CG5669_6.gff	23	1.853	0.89	0.009901
OGTsharedPRE.bed	fd96Ca_17.gff	22	1.849	0.887	0.009901
OGTsharedPRE.bed	bin_17.gff	28	1.847	0.885	0.009901
OGTsharedPRE.bed	fkh_38.gff	28	1.835	0.876	0.009901
OGTsharedPRE.bed	Adf1.gff	16	1.833	0.874	0.019802
OGTsharedPRE.bed	CG9571_18.gff	22	1.832	0.873	0.009901
OGTsharedPRE.bed	fd59A_44.gff	28	1.83	0.872	0.009901
OGTsharedPRE.bed	fd64A_20.gff	22	1.821	0.865	0.009901
OGTsharedPRE.bed	Poxn_3.gff	28	1.822	0.865	0.009901
OGTsharedPRE.bed	CG11152_97.gff	23	1.82	0.864	0.009901
OGTsharedPRE.bed	croc_21.gff	22	1.814	0.859	0.009901
OGTsharedPRE.bed	fkh_85.gff	23	1.814	0.859	0.009901
OGTsharedPRE.bed	CG11152_19.gff	22	1.812	0.858	0.009901
OGTsharedPRE.bed	CG5669_19.gff	23	1.812	0.858	0.009901
OGTsharedPRE.bed	fkh_17.gff	22	1.812	0.858	0.009901
OGTsharedPRE.bed	croc_94.gff	23	1.805	0.852	0.009901
OGTsharedPRE.bed	fd96Cb_38.gff	28	1.803	0.85	0.009901
OGTsharedPRE.bed	fd96Ca_41.gff	28	1.799	0.848	0.009901
OGTsharedPRE.bed	fd59A_19.gff	22	1.793	0.842	0.009901
OGTsharedPRE.bed	CG9571_50.gff	27	1.79	0.84	0.009901
OGTsharedPRE.bed	slp1_19.gff	22	1.79	0.84	0.019802
OGTsharedPRE.bed	sv_6.gff	28	1.787	0.837	0.009901
OGTsharedPRE.bed	slp2_47.gff	28	1.783	0.835	0.009901
OGTsharedPRE.bed	Sp1_9.gff	23	1.782	0.833	0.019802
OGTsharedPRE.bed	ss_4.gff	29	1.78	0.832	0.009901
OGTsharedPRE.bed	FBgn0261705_20.gff	26	1.778	0.831	0.009901
OGTsharedPRE.bed	CG9571_87.gff	23	1.777	0.83	0.009901
OGTsharedPRE.bed	bin_38.gff	23	1.775	0.828	0.009901
OGTsharedPRE.bed	slp2_12.gff	25	1.768	0.822	0.009901
OGTsharedPRE.bed	slp1_97.gff	23	1.762	0.818	0.009901
OGTsharedPRE.bed	fd64A_43.gff	28	1.759	0.815	0.009901
OGTsharedPRE.bed	fd64A_54.gff	27	1.759	0.815	0.009901
OGTsharedPRE.bed	CG9571_40.gff	28	1.758	0.814	0.009901
OGTsharedPRE.bed	fd64A_91.gff	23	1.756	0.812	0.009901
OGTsharedPRE.bed	CG11152_47.gff	28	1.753	0.81	0.009901
OGTsharedPRE.bed	sr_17.gff	24	1.753	0.81	0.009901
sharedOGTandPcl.bed	Trl.gff	58	1.744	0.803	0.009901
sharedOGTandPcl.bed	Trl_2.gff	58	1.743	0.801	0.009901
OGTsharedPRE.bed	fd96Cb_17.gff	22	1.742	0.801	0.029703
OGTsharedPRE.bed	FBgn0262477_5.gff	23	1.741	0.8	0.019802
OGTsharedPRE.bed	croc_44.gff	28	1.737	0.797	0.009901
OGTsharedPRE.bed	FBgn0263239_7.gff	21	1.737	0.797	0.009901
OGTsharedPRE.bed	slp2_60.gff	27	1.737	0.797	0.009901
OGTsharedPRE.bed	sr_18.gff	27	1.736	0.796	0.009901
OGTsharedPRE.bed	Blimp-1_2.gff	26	1.734	0.795	0.009901
OGTsharedPRE.bed	slp2_97.gff	23	1.735	0.795	0.009901
OGTsharedPRE.bed	Fer1_5.gff	28	1.728	0.789	0.009901
OGTsharedPRE.bed	CG5669_9.gff	23	1.724	0.786	0.009901
OGTsharedPRE.bed	fd59A_95.gff	23	1.724	0.786	0.009901
OGTsharedPRE.bed	fd59A_56.gff	27	1.723	0.785	0.009901
OGTsharedPRE.bed	croc_13.gff	25	1.721	0.783	0.009901
OGTsharedPRE.bed	slp1_60.gff	27	1.721	0.783	0.009901
sharedOGTandPcl.bed	nej2.gff	41	1.717	0.78	0.009901
OGTsharedPRE.bed	Fer3_5.gff	28	1.715	0.778	0.009901
OGTsharedPRE.bed	fkh_49.gff	27	1.714	0.778	0.009901
OGTsharedPRE.bed	fd96Cb_49.gff	27	1.713	0.777	0.009901
OGTsharedPRE.bed	fd96Cb_85.gff	23	1.714	0.777	0.009901
sharedOGTandPcl.bed	Optix.gff	73	1.711	0.775	0.009901
OGTsharedPRE.bed	fd96Ca_11.gff	25	1.706	0.771	0.009901
OGTsharedPRE.bed	slp1_47.gff	28	1.705	0.77	0.009901
OGTsharedPRE.bed	CG11152_60.gff	27	1.701	0.767	0.009901
OGTsharedPRE.bed	bin_22.gff	27	1.698	0.764	0.009901
sharedOGTandPcl.bed	PhoRC1.gff	27	1.698	0.764	0.009901
OGTsharedPRE.bed	fd59A_76.gff	25	1.689	0.756	0.009901
OGTsharedPRE.bed	fd96Ca_87.gff	23	1.689	0.756	0.019802
OGTsharedPRE.bed	fkh_11.gff	25	1.688	0.755	0.009901
OGTsharedPRE.bed	fd64A_12.gff	25	1.687	0.754	0.009901
OGTsharedPRE.bed	sr_24.gff	27	1.686	0.754	0.009901
OGTsharedPRE.bed	slp1_78.gff	25	1.686	0.753	0.019802
OGTsharedPRE.bed	fd96Cb_11.gff	25	1.685	0.752	0.009901
OGTsharedPRE.bed	croc_35.gff	26	1.682	0.75	0.009901
OGTsharedPRE.bed	fd96Ca_71.gff	25	1.682	0.75	0.009901
OGTsharedPRE.bed	fd96Ca_10.gff	23	1.678	0.746	0.009901
OGTsharedPRE.bed	fd59A_34.gff	26	1.677	0.746	0.019802
OGTsharedPRE.bed	fd96Ca_53.gff	27	1.672	0.741	0.009901
OGTsharedPRE.bed	CrebB-17A_2.gff	24	1.667	0.737	0.009901
OGTsharedPRE.bed	FBgn0261705_8.gff	21	1.667	0.737	0.009901
OGTsharedPRE.bed	fd64A_34.gff	26	1.667	0.737	0.009901
OGTsharedPRE.bed	fd64A_72.gff	25	1.667	0.737	0.019802
OGTsharedPRE.bed	CG4360.gff	21	1.664	0.735	0.029703
OGTsharedPRE.bed	slp2_36.gff	26	1.663	0.734	0.009901
OGTsharedPRE.bed	CG9571_12.gff	25	1.662	0.733	0.009901
sharedOGTandPcl.bed	Optix_4.gff	79	1.662	0.733	0.009901
OGTsharedPRE.bed	CG11152_12.gff	25	1.662	0.733	0.029703
OGTsharedPRE.bed	FBgn0261705_18.gff	25	1.661	0.732	0.009901
OGTsharedPRE.bed	slp1_36.gff	26	1.661	0.732	0.009901
OGTsharedPRE.bed	fkh_31.gff	26	1.66	0.731	0.009901
OGTsharedPRE.bed	bin_4.gff	25	1.658	0.729	0.009901
OGTsharedPRE.bed	Fer2_5.gff	28	1.658	0.729	0.009901
OGTsharedPRE.bed	fd96Ca_33.gff	26	1.657	0.729	0.019802
OGTsharedPRE.bed	Sp1_7.gff	20	1.654	0.726	0.009901
OGTsharedPRE.bed	croc_2.gff	24	1.653	0.725	0.009901
OGTsharedPRE.bed	srp_29.gff	16	1.653	0.725	0.019802
sharedOGTandPcl.bed	Aef1_2.gff	49	1.652	0.724	0.009901
OGTsharedPRE.bed	croc_55.gff	27	1.649	0.722	0.019802
OGTsharedPRE.bed	CG5669_3.gff	23	1.649	0.721	0.019802
OGTsharedPRE.bed	FBgn0261963_2.gff	25	1.648	0.721	0.019802
OGTsharedPRE.bed	fd96Cb_31.gff	26	1.648	0.72	0.009901
OGTsharedPRE.bed	slp1_12.gff	25	1.647	0.72	0.009901
OGTsharedPRE.bed	CG9571_31.gff	26	1.646	0.719	0.009901
OGTsharedPRE.bed	sr_10.gff	26	1.643	0.717	0.019802
OGTsharedPRE.bed	CG11152_36.gff	26	1.639	0.713	0.009901
sharedOGTandPcl.bed	PhoRC8.gff	42	1.639	0.713	0.019802
OGTsharedPRE.bed	fkh_69.gff	25	1.638	0.712	0.009901
OGTsharedPRE.bed	fd59A_12.gff	25	1.638	0.712	0.019802
OGTsharedPRE.bed	ci_5.gff	26	1.635	0.709	0.019802
OGTsharedPRE.bed	srp_33.gff	26	1.635	0.709	0.019802
OGTsharedPRE.bed	srp_28.gff	25	1.633	0.707	0.009901
OGTsharedPRE.bed	CG11152_78.gff	25	1.628	0.703	0.009901
OGTsharedPRE.bed	croc_75.gff	25	1.625	0.701	0.019802
OGTsharedPRE.bed	Blimp-1_3.gff	25	1.624	0.7	0.019802
OGTsharedPRE.bed	bin_32.gff	25	1.623	0.699	0.009901
OGTsharedPRE.bed	slp2_78.gff	25	1.622	0.698	0.009901
OGTsharedPRE.bed	CG5669_7.gff	20	1.621	0.697	0.039604
OGTsharedPRE.bed	fd64A_58.gff	23	1.616	0.693	0.029703
sharedOGTandPcl.bed	crol.gff	45	1.615	0.692	0.009901
OGTsharedPRE.bed	rn_2.gff	18	1.616	0.692	0.019802
OGTsharedPRE.bed	CG9571_68.gff	25	1.612	0.689	0.019802
OGTsharedPRE.bed	fd96Cb_53.gff	23	1.605	0.683	0.009901
OGTsharedPRE.bed	fd96Ca_57.gff	23	1.604	0.682	0.009901
OGTsharedPRE.bed	fd96Cb_69.gff	25	1.605	0.682	0.009901
OGTsharedPRE.bed	slp2_55.gff	24	1.604	0.682	0.029703
OGTsharedPRE.bed	slp2_38.gff	17	1.602	0.68	0.009901
OGTsharedPRE.bed	slp2_64.gff	23	1.602	0.68	0.019802
OGTsharedPRE.bed	FBgn0263239_17.gff	25	1.602	0.679	0.009901
OGTsharedPRE.bed	Adf1_3.gff	25	1.601	0.679	0.019802
OGTsharedPRE.bed	Sp1_3.gff	23	1.598	0.677	0.009901
OGTsharedPRE.bed	slp1_94.gff	28	1.597	0.676	0.009901
OGTsharedPRE.bed	fd64A_11.gff	23	1.595	0.674	0.009901
OGTsharedPRE.bed	slp1_11.gff	23	1.595	0.674	0.009901
OGTsharedPRE.bed	sr_12.gff	25	1.595	0.674	0.019802
OGTsharedPRE.bed	CG9571_11.gff	23	1.593	0.672	0.009901
OGTsharedPRE.bed	sr_21.gff	24	1.592	0.67	0.009901
OGTsharedPRE.bed	da_20.gff	24	1.592	0.67	0.019802
OGTsharedPRE.bed	fd59A_92.gff	28	1.584	0.663	0.009901
OGTsharedPRE.bed	CG11152_11.gff	23	1.583	0.663	0.019802
OGTsharedPRE.bed	fd96Cb_78.gff	21	1.581	0.661	0.009901
OGTsharedPRE.bed	sr_4.gff	21	1.58	0.66	0.009901
OGTsharedPRE.bed	Poxm_9.gff	25	1.579	0.659	0.019802
OGTsharedPRE.bed	fkh_53.gff	23	1.578	0.658	0.019802
OGTsharedPRE.bed	CG9571_54.gff	23	1.576	0.657	0.009901
OGTsharedPRE.bed	fd96Cb_10.gff	23	1.575	0.656	0.009901
OGTsharedPRE.bed	CG5669_21.gff	17	1.576	0.656	0.029703
OGTsharedPRE.bed	dpn.gff	25	1.575	0.656	0.029703
OGTsharedPRE.bed	FBgn0262477_4.gff	24	1.575	0.655	0.009901
OGTsharedPRE.bed	croc_87.gff	21	1.572	0.652	0.019802
OGTsharedPRE.bed	slp1_64.gff	23	1.571	0.652	0.019802
OGTsharedPRE.bed	CG9571_84.gff	28	1.57	0.651	0.019802
OGTsharedPRE.bed	sr_6.gff	23	1.569	0.65	0.009901
OGTsharedPRE.bed	CG7368.gff	16	1.567	0.648	0.049505
OGTsharedPRE.bed	sv_12.gff	26	1.566	0.647	0.019802
OGTsharedPRE.bed	da_9.gff	25	1.564	0.646	0.009901
OGTsharedPRE.bed	fd59A_11.gff	23	1.565	0.646	0.009901
OGTsharedPRE.bed	fkh_78.gff	21	1.565	0.646	0.029703
OGTsharedPRE.bed	CG11152_90.gff	21	1.565	0.646	0.049505
OGTsharedPRE.bed	sr.gff	23	1.562	0.644	0.029703
OGTsharedPRE.bed	FBgn0261705_7.gff	21	1.561	0.643	0.029703
OGTsharedPRE.bed	CG11152_64.gff	23	1.56	0.642	0.009901
OGTsharedPRE.bed	Poxn_9.gff	26	1.56	0.641	0.009901
OGTsharedPRE.bed	bin_3.gff	23	1.558	0.64	0.029703
OGTsharedPRE.bed	fd96Ca_80.gff	21	1.558	0.64	0.029703
sharedOGTandPcl.bed	PhoRC27.gff	45	1.557	0.639	0.009901
OGTsharedPRE.bed	brk.gff	22	1.555	0.637	0.009901
OGTsharedPRE.bed	CG9571_47.gff	24	1.555	0.637	0.019802
OGTsharedPRE.bed	FBgn0263239_9.gff	24	1.554	0.636	0.029703
OGTsharedPRE.bed	fd64A_62.gff	31	1.553	0.635	0.009901
OGTsharedPRE.bed	fkh_10.gff	23	1.553	0.635	0.029703
OGTsharedPRE.bed	sr_29.gff	17	1.553	0.635	0.039604
OGTsharedPRE.bed	croc_52.gff	24	1.552	0.634	0.009901
OGTsharedPRE.bed	fd64A_84.gff	21	1.552	0.634	0.009901
OGTsharedPRE.bed	foxo_12.gff	24	1.552	0.634	0.009901
OGTsharedPRE.bed	slp2_57.gff	24	1.551	0.634	0.009901
OGTsharedPRE.bed	Sp1_11.gff	24	1.551	0.634	0.019802
OGTsharedPRE.bed	CG5669_11.gff	24	1.552	0.634	0.029703
OGTsharedPRE.bed	slp1_90.gff	21	1.551	0.633	0.019802
OGTsharedPRE.bed	fd59A_88.gff	21	1.55	0.632	0.009901
OGTsharedPRE.bed	ss.gff	27	1.55	0.632	0.009901
OGTsharedPRE.bed	fd64A_39.gff	21	1.55	0.632	0.029703
OGTsharedPRE.bed	slp2_90.gff	21	1.549	0.631	0.029703
OGTsharedPRE.bed	fkh_37.gff	24	1.548	0.631	0.039604
OGTsharedPRE.bed	brk_2.gff	22	1.547	0.63	0.009901
OGTsharedPRE.bed	ci_4.gff	25	1.547	0.63	0.009901
OGTsharedPRE.bed	dpn_3.gff	25	1.548	0.63	0.009901
OGTsharedPRE.bed	fd96Ca_49.gff	24	1.547	0.63	0.009901
OGTsharedPRE.bed	sr_14.gff	20	1.547	0.629	0.049505
OGTsharedPRE.bed	croc_59.gff	23	1.546	0.628	0.019802
OGTsharedPRE.bed	slp2_11.gff	23	1.546	0.628	0.019802
OGTsharedPRE.bed	CG11152_23.gff	17	1.544	0.627	0.049505
OGTsharedPRE.bed	CG9571_34.gff	23	1.544	0.626	0.019802
OGTsharedPRE.bed	croc_12.gff	23	1.544	0.626	0.019802
OGTsharedPRE.bed	croc_38.gff	23	1.543	0.625	0.009901
OGTsharedPRE.bed	slp1_68.gff	31	1.542	0.625	0.009901
OGTsharedPRE.bed	slp1_114.gff	23	1.543	0.625	0.029703
OGTsharedPRE.bed	FBgn0261963_6.gff	23	1.542	0.624	0.009901
OGTsharedPRE.bed	fd96Ca_73.gff	32	1.541	0.624	0.009901
OGTsharedPRE.bed	CG11152_55.gff	24	1.54	0.623	0.009901
OGTsharedPRE.bed	fd96Cb_59.gff	31	1.54	0.623	0.009901
OGTsharedPRE.bed	slp2_94.gff	28	1.54	0.623	0.009901
OGTsharedPRE.bed	fd96Cb_46.gff	24	1.538	0.621	0.009901
OGTsharedPRE.bed	fd64A_108.gff	23	1.537	0.621	0.019802
OGTsharedPRE.bed	twi.gff	24	1.537	0.621	0.019802
OGTsharedPRE.bed	fd59A_35.gff	17	1.537	0.62	0.039604
OGTsharedPRE.bed	fd96Ca_65.gff	23	1.535	0.619	0.009901
OGTsharedPRE.bed	fd64A_66.gff	23	1.535	0.619	0.029703
OGTsharedPRE.bed	slp1_55.gff	24	1.535	0.618	0.009901
OGTsharedPRE.bed	CG11152_75.gff	22	1.534	0.617	0.009901
sharedOGTandPcl.bed	HLHm7_4.gff	70	1.534	0.617	0.009901
OGTsharedPRE.bed	CG5669_15.gff	24	1.534	0.617	0.019802
OGTsharedPRE.bed	sr_9.gff	24	1.533	0.616	0.009901
sharedOGTandPcl.bed	mor.gff	66	1.533	0.616	0.009901
OGTsharedPRE.bed	fd64A_51.gff	24	1.532	0.615	0.019802
OGTsharedPRE.bed	fd59A_60.gff	23	1.531	0.615	0.029703
OGTsharedPRE.bed	sr_20.gff	24	1.532	0.615	0.029703
OGTsharedPRE.bed	fd64A_88.gff	28	1.529	0.613	0.009901
sharedOGTandPcl.bed	nej0.gff	49	1.528	0.612	0.009901
OGTsharedPRE.bed	CG11152_41.gff	23	1.528	0.612	0.059406
OGTsharedPRE.bed	fd59A_57.gff	23	1.527	0.611	0.009901
OGTsharedPRE.bed	foxo_28.gff	21	1.527	0.611	0.049505
sharedOGTandPcl.bed	HLHmdelta_2.gff	70	1.526	0.61	0.009901
OGTsharedPRE.bed	fd59A_52.gff	24	1.527	0.61	0.019802
OGTsharedPRE.bed	fkh_59.gff	31	1.525	0.609	0.009901
OGTsharedPRE.bed	slp2_68.gff	31	1.526	0.609	0.009901
OGTsharedPRE.bed	sv_3.gff	25	1.525	0.609	0.009901
OGTsharedPRE.bed	CG11152_37.gff	28	1.525	0.609	0.019802
OGTsharedPRE.bed	CG9571_104.gff	23	1.524	0.608	0.029703
sharedOGTandPcl.bed	Adf1_2.gff	68	1.522	0.606	0.009901
sharedOGTandPcl.bed	org-1_3.gff	72	1.522	0.606	0.009901
OGTsharedPRE.bed	CG11152_68.gff	31	1.522	0.606	0.029703
OGTsharedPRE.bed	slp1_38.gff	17	1.522	0.606	0.049505
OGTsharedPRE.bed	fd59A_38.gff	23	1.519	0.603	0.009901
OGTsharedPRE.bed	fd96Ca_34.gff	28	1.519	0.603	0.009901
OGTsharedPRE.bed	fd96Ca_84.gff	28	1.519	0.603	0.009901
sharedOGTandPcl.bed	HLHmbeta_4.gff	70	1.518	0.603	0.009901
OGTsharedPRE.bed	fd96Ca_50.gff	24	1.519	0.603	0.019802
OGTsharedPRE.bed	croc_91.gff	28	1.518	0.602	0.009901
OGTsharedPRE.bed	slp1_43.gff	21	1.517	0.602	0.019802
OGTsharedPRE.bed	sr_22.gff	24	1.518	0.602	0.029703
OGTsharedPRE.bed	slp1_56.gff	17	1.518	0.602	0.059406
OGTsharedPRE.bed	slp2_56.gff	17	1.518	0.602	0.059406
OGTsharedPRE.bed	croc_65.gff	31	1.517	0.601	0.009901
OGTsharedPRE.bed	CG11152_61.gff	23	1.517	0.601	0.029703
OGTsharedPRE.bed	CG9571_51.gff	23	1.517	0.601	0.039604
OGTsharedPRE.bed	CrebB-17A_3.gff	24	1.516	0.6	0.019802
OGTsharedPRE.bed	foxo_26.gff	22	1.516	0.6	0.019802
OGTsharedPRE.bed	FBgn0262975.gff	25	1.514	0.599	0.009901
OGTsharedPRE.bed	fd96Ca_61.gff	31	1.515	0.599	0.009901
OGTsharedPRE.bed	slp1_72.gff	23	1.514	0.599	0.009901
sharedOGTandPcl.bed	HLHm3_4.gff	70	1.514	0.599	0.009901
OGTsharedPRE.bed	slp1_41.gff	23	1.515	0.599	0.019802
OGTsharedPRE.bed	slp2_72.gff	23	1.514	0.599	0.019802
OGTsharedPRE.bed	fkh_102.gff	23	1.515	0.599	0.029703
OGTsharedPRE.bed	fd64A_37.gff	23	1.515	0.599	0.039604
OGTsharedPRE.bed	CG9571_58.gff	31	1.514	0.598	0.009901
OGTsharedPRE.bed	CG11152_22.gff	21	1.514	0.598	0.029703
OGTsharedPRE.bed	slp2_43.gff	21	1.514	0.598	0.029703
OGTsharedPRE.bed	slp2_41.gff	23	1.513	0.598	0.039604
OGTsharedPRE.bed	fd59A_66.gff	31	1.512	0.597	0.019802
OGTsharedPRE.bed	Sp1_15.gff	24	1.511	0.596	0.019802
OGTsharedPRE.bed	slp1_22.gff	21	1.512	0.596	0.029703
OGTsharedPRE.bed	slp1_80.gff	32	1.511	0.595	0.009901
OGTsharedPRE.bed	sr_27.gff	23	1.51	0.595	0.019802
OGTsharedPRE.bed	sv_11.gff	25	1.511	0.595	0.019802
OGTsharedPRE.bed	croc_69.gff	23	1.51	0.595	0.029703
OGTsharedPRE.bed	Poxn_8.gff	25	1.511	0.595	0.029703
OGTsharedPRE.bed	CG9571_80.gff	21	1.511	0.595	0.039604
OGTsharedPRE.bed	fd96Ca_40.gff	24	1.509	0.594	0.029703
OGTsharedPRE.bed	srp_24.gff	23	1.509	0.594	0.039604
OGTsharedPRE.bed	fd96Cb_34.gff	23	1.508	0.593	0.019802
OGTsharedPRE.bed	cyc_10.gff	21	1.509	0.593	0.039604
OGTsharedPRE.bed	croc_111.gff	23	1.507	0.592	0.019802
OGTsharedPRE.bed	fkh_46.gff	24	1.508	0.592	0.019802
OGTsharedPRE.bed	CG11152_72.gff	23	1.506	0.591	0.029703
OGTsharedPRE.bed	fd59A_112.gff	23	1.505	0.59	0.009901
OGTsharedPRE.bed	FBgn0263239_6.gff	21	1.505	0.59	0.029703
OGTsharedPRE.bed	bin_29.gff	22	1.504	0.589	0.009901
OGTsharedPRE.bed	bin_21.gff	24	1.505	0.589	0.019802
OGTsharedPRE.bed	FBgn0261705_10.gff	24	1.505	0.589	0.019802
OGTsharedPRE.bed	bin_16.gff	24	1.504	0.589	0.029703
OGTsharedPRE.bed	slp1_37.gff	28	1.503	0.588	0.009901
OGTsharedPRE.bed	CG9571_62.gff	23	1.503	0.588	0.029703
OGTsharedPRE.bed	slp1_61.gff	23	1.503	0.588	0.029703
OGTsharedPRE.bed	croc_43.gff	24	1.502	0.587	0.019802
OGTsharedPRE.bed	fd59A_53.gff	17	1.502	0.587	0.049505
OGTsharedPRE.bed	slp2_37.gff	28	1.501	0.586	0.009901
OGTsharedPRE.bed	fd96Ca_39.gff	21	1.5	0.585	0.039604
OGTsharedPRE.bed	croc_49.gff	21	1.498	0.583	0.019802
OGTsharedPRE.bed	fd64A_53.gff	22	1.498	0.583	0.019802
OGTsharedPRE.bed	slp2_52.gff	21	1.498	0.583	0.029703
OGTsharedPRE.bed	CG11152_56.gff	17	1.498	0.583	0.039604
OGTsharedPRE.bed	CG11152_94.gff	28	1.497	0.582	0.009901
OGTsharedPRE.bed	FBgn0261705_16.gff	23	1.496	0.582	0.019802
OGTsharedPRE.bed	fd96Cb_82.gff	28	1.497	0.582	0.019802
sharedOGTandPcl.bed	CG5669_23.gff	43	1.496	0.581	0.009901
OGTsharedPRE.bed	sr_19.gff	24	1.495	0.58	0.029703
OGTsharedPRE.bed	Sp1_21.gff	17	1.495	0.58	0.059406
OGTsharedPRE.bed	CG11152_38.gff	17	1.495	0.58	0.118812
OGTsharedPRE.bed	bin_43.gff	23	1.492	0.577	0.009901
sharedOGTandPcl.bed	HLHmgamma_5.gff	70	1.492	0.577	0.009901
OGTsharedPRE.bed	CG11152_57.gff	24	1.491	0.576	0.019802
OGTsharedPRE.bed	fd96Cb_50.gff	23	1.491	0.576	0.019802
OGTsharedPRE.bed	fd96Cb_63.gff	23	1.491	0.576	0.019802
OGTsharedPRE.bed	fd96Cb_43.gff	21	1.489	0.575	0.039604
OGTsharedPRE.bed	eg_7.gff	24	1.489	0.574	0.029703
OGTsharedPRE.bed	fd96Ca_68.gff	22	1.488	0.574	0.039604
OGTsharedPRE.bed	fd64A_48.gff	21	1.487	0.573	0.009901
OGTsharedPRE.bed	fkh_50.gff	23	1.488	0.573	0.009901
OGTsharedPRE.bed	croc_85.gff	19	1.488	0.573	0.039604
OGTsharedPRE.bed	slp1_57.gff	24	1.487	0.572	0.019802
sharedOGTandPcl.bed	CG7368_3.gff	46	1.487	0.572	0.019802
OGTsharedPRE.bed	fd96Ca_107.gff	21	1.486	0.572	0.049505
OGTsharedPRE.bed	sr_25.gff	21	1.485	0.571	0.049505
OGTsharedPRE.bed	fd64A_42.gff	24	1.484	0.57	0.029703
sharedOGTandPcl.bed	bi_8.gff	72	1.483	0.569	0.009901
OGTsharedPRE.bed	fd64A_102.gff	22	1.483	0.569	0.019802
OGTsharedPRE.bed	fd96Ca_54.gff	23	1.484	0.569	0.019802
OGTsharedPRE.bed	fd96Cb_37.gff	24	1.483	0.569	0.039604
OGTsharedPRE.bed	fd96Ca_16.gff	22	1.482	0.568	0.019802
OGTsharedPRE.bed	CG11152_80.gff	32	1.481	0.567	0.009901
OGTsharedPRE.bed	fkh_82.gff	28	1.481	0.567	0.009901
OGTsharedPRE.bed	FBgn0263239_8.gff	23	1.481	0.567	0.019802
OGTsharedPRE.bed	CG11152_46.gff	24	1.481	0.566	0.039604
OGTsharedPRE.bed	bin_34.gff	32	1.479	0.565	0.009901
OGTsharedPRE.bed	fd59A_17.gff	22	1.479	0.565	0.039604
OGTsharedPRE.bed	FBgn0261705_21.gff	23	1.479	0.565	0.049505
OGTsharedPRE.bed	br_13.gff	23	1.478	0.564	0.019802
OGTsharedPRE.bed	CG9571_39.gff	24	1.479	0.564	0.029703
OGTsharedPRE.bed	croc_72.gff	22	1.478	0.564	0.049505
OGTsharedPRE.bed	slp1_46.gff	24	1.477	0.563	0.009901
sharedOGTandPcl.bed	Sp1_23.gff	43	1.478	0.563	0.019802
OGTsharedPRE.bed	fd96Ca_104.gff	23	1.476	0.562	0.029703
sharedOGTandPcl.bed	bi_2.gff	75	1.474	0.56	0.009901
OGTsharedPRE.bed	fd96Ca_37.gff	23	1.474	0.56	0.029703
OGTsharedPRE.bed	fkh_63.gff	23	1.473	0.559	0.019802
sharedOGTandPcl.bed	PhoRC26.gff	59	1.472	0.558	0.009901
OGTsharedPRE.bed	fd96Cb_71.gff	32	1.471	0.556	0.009901
OGTsharedPRE.bed	sr_23.gff	22	1.471	0.556	0.049505
OGTsharedPRE.bed	fkh_71.gff	32	1.469	0.555	0.009901
OGTsharedPRE.bed	slp1_5.gff	18	1.469	0.555	0.039604
OGTsharedPRE.bed	tgo_16.gff	21	1.47	0.555	0.049505
OGTsharedPRE.bed	foxo_7.gff	23	1.468	0.554	0.009901
OGTsharedPRE.bed	slp2_80.gff	32	1.469	0.554	0.009901
OGTsharedPRE.bed	fkh_96.gff	22	1.469	0.554	0.029703
OGTsharedPRE.bed	CG9571_44.gff	21	1.469	0.554	0.039604
OGTsharedPRE.bed	CTCF.gff	22	1.467	0.553	0.019802
OGTsharedPRE.bed	FBgn0261705_19.gff	23	1.466	0.552	0.039604
OGTsharedPRE.bed	FBgn0263239_5.gff	23	1.465	0.551	0.009901
OGTsharedPRE.bed	foxo_24.gff	31	1.465	0.551	0.019802
OGTsharedPRE.bed	croc_56.gff	23	1.465	0.551	0.029703
OGTsharedPRE.bed	fd59A_70.gff	23	1.465	0.551	0.039604
OGTsharedPRE.bed	FBgn0261705_6.gff	23	1.464	0.55	0.039604
OGTsharedPRE.bed	Ubx_30.gff	23	1.464	0.55	0.039604
OGTsharedPRE.bed	fd96Ca_98.gff	22	1.463	0.549	0.019802
sharedOGTandPcl.bed	PhoRC24.gff	34	1.463	0.549	0.019802
OGTsharedPRE.bed	slp2_46.gff	24	1.463	0.549	0.029703
OGTsharedPRE.bed	CG11152_88.gff	19	1.463	0.549	0.049505
OGTsharedPRE.bed	fd59A_40.gff	21	1.463	0.549	0.049505
OGTsharedPRE.bed	FBgn0262477_3.gff	23	1.463	0.549	0.059406
OGTsharedPRE.bed	fd59A_22.gff	21	1.462	0.548	0.039604
OGTsharedPRE.bed	fd96Ca_46.gff	21	1.461	0.547	0.019802
OGTsharedPRE.bed	eve_3.gff	21	1.461	0.547	0.039604
OGTsharedPRE.bed	fd59A_49.gff	21	1.461	0.547	0.049505
OGTsharedPRE.bed	fkh_43.gff	21	1.461	0.547	0.049505
OGTsharedPRE.bed	CG11152_59.gff	22	1.46	0.546	0.059406
OGTsharedPRE.bed	CG9571_70.gff	32	1.459	0.545	0.009901
OGTsharedPRE.bed	fd64A_74.gff	32	1.459	0.545	0.009901
OGTsharedPRE.bed	CrebB-17A_9.gff	24	1.459	0.545	0.019802
OGTsharedPRE.bed	fd64A_55.gff	23	1.459	0.545	0.029703
OGTsharedPRE.bed	slp2_114.gff	23	1.459	0.545	0.049505
OGTsharedPRE.bed	fd96Ca_20.gff	17	1.459	0.545	0.069307
OGTsharedPRE.bed	croc_77.gff	32	1.457	0.543	0.009901
OGTsharedPRE.bed	fd59A_78.gff	32	1.457	0.543	0.009901
OGTsharedPRE.bed	slp1_106.gff	31	1.457	0.543	0.009901
OGTsharedPRE.bed	CG11152_52.gff	21	1.457	0.543	0.029703
OGTsharedPRE.bed	FBgn0261705_9.gff	23	1.457	0.543	0.039604
sharedOGTandPcl.bed	HLH106_9.gff	72	1.456	0.542	0.009901
OGTsharedPRE.bed	CG11152_114.gff	23	1.456	0.542	0.049505
OGTsharedPRE.bed	croc_101.gff	21	1.455	0.541	0.009901
OGTsharedPRE.bed	fd64A_82.gff	19	1.455	0.541	0.029703
OGTsharedPRE.bed	BRC1_DROME_13.gff	23	1.454	0.54	0.019802
OGTsharedPRE.bed	fd96Cb_36.gff	21	1.454	0.54	0.039604
OGTsharedPRE.bed	CG11152_5.gff	18	1.454	0.54	0.049505
OGTsharedPRE.bed	fd96Cb_102.gff	23	1.454	0.54	0.049505
OGTsharedPRE.bed	CG9571_96.gff	31	1.453	0.539	0.019802
OGTsharedPRE.bed	CG9571_17.gff	22	1.453	0.539	0.029703
OGTsharedPRE.bed	CG9571_98.gff	22	1.451	0.537	0.039604
OGTsharedPRE.bed	Sp1_16.gff	20	1.45	0.536	0.039604
OGTsharedPRE.bed	fd96Ca_4.gff	18	1.45	0.536	0.069307
sharedOGTandPcl.bed	HLH106_8.gff	71	1.449	0.535	0.009901
OGTsharedPRE.bed	sr_26.gff	23	1.449	0.535	0.039604
OGTsharedPRE.bed	fd59A_86.gff	19	1.449	0.535	0.059406
OGTsharedPRE.bed	CG5669_10.gff	23	1.448	0.534	0.029703
OGTsharedPRE.bed	slp2_23.gff	17	1.448	0.534	0.138614
OGTsharedPRE.bed	Antp_36.gff	23	1.447	0.533	0.029703
OGTsharedPRE.bed	fkh_66.gff	22	1.447	0.533	0.039604
OGTsharedPRE.bed	croc_20.gff	22	1.447	0.533	0.049505
sharedOGTandPcl.bed	PhoRC6.gff	59	1.446	0.532	0.009901
OGTsharedPRE.bed	RunxA_8.gff	22	1.445	0.532	0.029703
OGTsharedPRE.bed	bin_15.gff	21	1.446	0.532	0.039604
OGTsharedPRE.bed	Rfx_13.gff	22	1.445	0.532	0.039604
OGTsharedPRE.bed	fd59A_73.gff	22	1.445	0.531	0.039604
OGTsharedPRE.bed	slp2_61.gff	23	1.445	0.531	0.049505
OGTsharedPRE.bed	CG11152_108.gff	22	1.444	0.53	0.029703
OGTsharedPRE.bed	fd64A_7.gff	21	1.444	0.53	0.039604
OGTsharedPRE.bed	slp1_118.gff	21	1.444	0.53	0.039604
OGTsharedPRE.bed	fd96Ca_64.gff	20	1.443	0.529	0.039604
OGTsharedPRE.bed	fd96Cb_96.gff	22	1.443	0.529	0.039604
OGTsharedPRE.bed	slp2_118.gff	21	1.443	0.529	0.039604
OGTsharedPRE.bed	fd96Cb_105.gff	21	1.443	0.529	0.049505
OGTsharedPRE.bed	CG9571_78.gff	19	1.443	0.529	0.079208
OGTsharedPRE.bed	FBgn0263239_18.gff	23	1.442	0.528	0.029703
OGTsharedPRE.bed	CG9571_65.gff	22	1.442	0.528	0.049505
OGTsharedPRE.bed	bin_20.gff	21	1.441	0.527	0.029703
OGTsharedPRE.bed	CG9571_16.gff	20	1.441	0.527	0.039604
OGTsharedPRE.bed	fd64A_69.gff	22	1.441	0.527	0.039604
OGTsharedPRE.bed	CG11152_118.gff	21	1.441	0.527	0.049505
OGTsharedPRE.bed	slp2_75.gff	22	1.441	0.527	0.049505
OGTsharedPRE.bed	slp1_88.gff	19	1.44	0.527	0.069307
OGTsharedPRE.bed	foxo_21.gff	31	1.44	0.526	0.009901
sharedOGTandPcl.bed	Ets98B_3.gff	58	1.439	0.525	0.009901
sharedOGTandPcl.bed	Mad.gff	57	1.439	0.525	0.009901
OGTsharedPRE.bed	croc_40.gff	21	1.438	0.524	0.019802
OGTsharedPRE.bed	fd59A_43.gff	24	1.438	0.524	0.029703
OGTsharedPRE.bed	srp_27.gff	23	1.438	0.524	0.029703
OGTsharedPRE.bed	fd64A_100.gff	31	1.437	0.523	0.009901
OGTsharedPRE.bed	Eip74EF_16.gff	23	1.436	0.522	0.019802
OGTsharedPRE.bed	CG11152_18.gff	22	1.436	0.522	0.029703
OGTsharedPRE.bed	croc_103.gff	31	1.436	0.522	0.029703
OGTsharedPRE.bed	CG9571_108.gff	21	1.436	0.522	0.049505
OGTsharedPRE.bed	fd96Cb_94.gff	31	1.435	0.521	0.009901
OGTsharedPRE.bed	sv_9.gff	23	1.435	0.521	0.039604
OGTsharedPRE.bed	slp1_33.gff	21	1.434	0.52	0.039604
OGTsharedPRE.bed	fkh_16.gff	22	1.434	0.52	0.059406
OGTsharedPRE.bed	CTCF_3.gff	21	1.432	0.519	0.019802
OGTsharedPRE.bed	CG5669_16.gff	20	1.433	0.519	0.029703
OGTsharedPRE.bed	fd64A_18.gff	22	1.433	0.519	0.039604
OGTsharedPRE.bed	fd96Ca_30.gff	21	1.432	0.519	0.049505
OGTsharedPRE.bed	fkh_94.gff	31	1.432	0.518	0.009901
OGTsharedPRE.bed	CG11152_33.gff	21	1.431	0.518	0.039604
OGTsharedPRE.bed	slp2_14.gff	20	1.432	0.518	0.049505
OGTsharedPRE.bed	fd64A_19.gff	22	1.431	0.517	0.039604
OGTsharedPRE.bed	slp1_75.gff	22	1.431	0.517	0.039604
OGTsharedPRE.bed	ara_8.gff	16	1.431	0.517	0.049505
sharedOGTandPcl.bed	Hey.gff	60	1.43	0.516	0.009901
OGTsharedPRE.bed	CG5669_17.gff	22	1.43	0.516	0.039604
OGTsharedPRE.bed	ci_6.gff	22	1.43	0.516	0.049505
OGTsharedPRE.bed	FBgn0263239_20.gff	23	1.43	0.516	0.059406
OGTsharedPRE.bed	CG11152_17.gff	22	1.429	0.515	0.019802
OGTsharedPRE.bed	eg_5.gff	23	1.429	0.515	0.039604
OGTsharedPRE.bed	fd59A_104.gff	31	1.427	0.513	0.009901
OGTsharedPRE.bed	fd96Ca_96.gff	31	1.427	0.513	0.019802
OGTsharedPRE.bed	CG11152_7.gff	21	1.427	0.513	0.049505
sharedOGTandPcl.bed	tgo_8.gff	58	1.426	0.512	0.009901
OGTsharedPRE.bed	fd96Ca_94.gff	21	1.426	0.512	0.039604
OGTsharedPRE.bed	slp1_52.gff	21	1.426	0.512	0.059406
OGTsharedPRE.bed	CG11152_106.gff	31	1.425	0.511	0.029703
OGTsharedPRE.bed	Rfx_22.gff	21	1.425	0.511	0.039604
OGTsharedPRE.bed	sr_2.gff	23	1.425	0.511	0.059406
OGTsharedPRE.bed	sr_3.gff	23	1.424	0.51	0.029703
OGTsharedPRE.bed	ftz_32.gff	23	1.424	0.51	0.039604
sharedOGTandPcl.bed	FBgn0263112_13.gff	61	1.423	0.509	0.009901
OGTsharedPRE.bed	fd96Cb_15.gff	20	1.423	0.509	0.039604
OGTsharedPRE.bed	CG11152_104.gff	21	1.423	0.509	0.049505
OGTsharedPRE.bed	croc_16.gff	18	1.423	0.509	0.069307
OGTsharedPRE.bed	CG11152_71.gff	20	1.423	0.509	0.079208
OGTsharedPRE.bed	da_12.gff	16	1.423	0.509	0.089109
OGTsharedPRE.bed	fkh_34.gff	23	1.422	0.508	0.039604
OGTsharedPRE.bed	fd64A_81.gff	21	1.422	0.508	0.069307
OGTsharedPRE.bed	fkh_73.gff	27	1.421	0.507	0.009901
sharedOGTandPcl.bed	Optix_3.gff	56	1.421	0.507	0.009901
OGTsharedPRE.bed	slp2_106.gff	31	1.421	0.507	0.019802
OGTsharedPRE.bed	Sp1_17.gff	22	1.421	0.507	0.019802
OGTsharedPRE.bed	fd64A_57.gff	22	1.421	0.507	0.039604
OGTsharedPRE.bed	slp1_17.gff	22	1.421	0.507	0.049505
OGTsharedPRE.bed	CG11152_14.gff	20	1.421	0.507	0.059406
OGTsharedPRE.bed	slp2_108.gff	22	1.42	0.506	0.029703
OGTsharedPRE.bed	slp2_17.gff	22	1.42	0.506	0.049505
OGTsharedPRE.bed	fkh_88.gff	10	1.42	0.506	0.168317
sharedOGTandPcl.bed	CrebB-17A_7.gff	71	1.419	0.505	0.009901
sharedOGTandPcl.bed	Poxn_9.gff	71	1.419	0.505	0.009901
OGTsharedPRE.bed	crp_5.gff	22	1.419	0.505	0.029703
OGTsharedPRE.bed	foxo_10.gff	22	1.419	0.505	0.029703
OGTsharedPRE.bed	Sp1_5.gff	21	1.419	0.505	0.069307
OGTsharedPRE.bed	srp_22.gff	22	1.418	0.504	0.009901
sharedOGTandPcl.bed	Poxm_10.gff	71	1.418	0.504	0.009901
OGTsharedPRE.bed	fd96Cb_16.gff	22	1.418	0.504	0.019802
OGTsharedPRE.bed	caup_8.gff	16	1.418	0.504	0.029703
OGTsharedPRE.bed	croc_105.gff	22	1.418	0.504	0.029703
OGTsharedPRE.bed	caup_16.gff	19	1.418	0.504	0.039604
OGTsharedPRE.bed	CG9571_61.gff	20	1.418	0.504	0.039604
OGTsharedPRE.bed	fkh_13.gff	20	1.418	0.504	0.049505
OGTsharedPRE.bed	fd59A_102.gff	21	1.418	0.504	0.059406
OGTsharedPRE.bed	FBgn0263239_15.gff	23	1.418	0.504	0.079208
OGTsharedPRE.bed	slp2_88.gff	19	1.417	0.503	0.039604
OGTsharedPRE.bed	foxo_27.gff	22	1.418	0.503	0.059406
OGTsharedPRE.bed	fd64A_5.gff	18	1.417	0.503	0.069307
OGTsharedPRE.bed	fd59A_63.gff	17	1.417	0.503	0.089109
OGTsharedPRE.bed	Scr_37.gff	23	1.416	0.502	0.019802
sharedOGTandPcl.bed	sr_8.gff	45	1.416	0.502	0.019802
OGTsharedPRE.bed	CG31670.gff	23	1.416	0.502	0.039604
OGTsharedPRE.bed	Sp1_10.gff	23	1.416	0.502	0.049505
OGTsharedPRE.bed	fd96Cb_66.gff	22	1.417	0.502	0.059406
OGTsharedPRE.bed	svp_28.gff	22	1.417	0.502	0.069307
OGTsharedPRE.bed	croc_8.gff	21	1.415	0.501	0.029703
OGTsharedPRE.bed	fd59A.gff	17	1.415	0.501	0.059406
OGTsharedPRE.bed	fkh_48.gff	22	1.415	0.501	0.059406
OGTsharedPRE.bed	fd59A_55.gff	22	1.414	0.5	0.019802
OGTsharedPRE.bed	dpn_7.gff	24	1.414	0.5	0.029703
OGTsharedPRE.bed	fd64A_16.gff	30	1.414	0.5	0.029703
OGTsharedPRE.bed	CG9571_5.gff	18	1.414	0.5	0.079208
sharedOGTandPcl.bed	HLH106_10.gff	72	1.413	0.499	0.009901
OGTsharedPRE.bed	fd59A_7.gff	21	1.413	0.499	0.029703
OGTsharedPRE.bed	croc_6.gff	18	1.413	0.499	0.069307
sharedOGTandPcl.bed	Sp1_22.gff	44	1.412	0.498	0.019802
OGTsharedPRE.bed	croc_98.gff	21	1.412	0.498	0.029703
OGTsharedPRE.bed	fd59A_18.gff	22	1.412	0.498	0.039604
OGTsharedPRE.bed	fd59A_14.gff	20	1.412	0.498	0.049505
OGTsharedPRE.bed	slp1_108.gff	22	1.412	0.498	0.079208
OGTsharedPRE.bed	CG9571.gff	17	1.412	0.498	0.089109
sharedOGTandPcl.bed	FBgn0262139_2.gff	49	1.412	0.497	0.009901
OGTsharedPRE.bed	croc_17.gff	30	1.411	0.497	0.019802
OGTsharedPRE.bed	croc_41.gff	21	1.411	0.497	0.039604
OGTsharedPRE.bed	fkh_92.gff	21	1.411	0.497	0.059406
OGTsharedPRE.bed	fd96Cb_4.gff	18	1.412	0.497	0.089109
sharedOGTandPcl.bed	pan_7.gff	56	1.411	0.496	0.009901
OGTsharedPRE.bed	slp1_104.gff	21	1.41	0.496	0.019802
OGTsharedPRE.bed	slp2_104.gff	21	1.41	0.496	0.049505
OGTsharedPRE.bed	slp2_18.gff	22	1.41	0.496	0.059406
OGTsharedPRE.bed	fkh_15.gff	20	1.41	0.496	0.069307
OGTsharedPRE.bed	croc_115.gff	21	1.409	0.495	0.049505
sharedOGTandPcl.bed	unpg_2.gff	59	1.408	0.494	0.009901
OGTsharedPRE.bed	bi_19.gff	22	1.408	0.494	0.019802
OGTsharedPRE.bed	slp1_63.gff	22	1.408	0.494	0.039604
OGTsharedPRE.bed	slp2_44.gff	21	1.408	0.494	0.049505
sharedOGTandPcl.bed	sv_11.gff	70	1.407	0.493	0.009901
OGTsharedPRE.bed	CrebB-17A_8.gff	22	1.408	0.493	0.049505
OGTsharedPRE.bed	fd64A_101.gff	21	1.408	0.493	0.049505
OGTsharedPRE.bed	CrebB-17A_6.gff	22	1.408	0.493	0.059406
OGTsharedPRE.bed	fd64A_98.gff	21	1.408	0.493	0.069307
OGTsharedPRE.bed	abd-A_37.gff	23	1.407	0.492	0.019802
OGTsharedPRE.bed	fkh_36.gff	21	1.407	0.492	0.069307
OGTsharedPRE.bed	da_40.gff	21	1.406	0.491	0.039604
OGTsharedPRE.bed	bin.gff	17	1.405	0.491	0.118812
OGTsharedPRE.bed	fd96Cb_95.gff	21	1.405	0.49	0.019802
OGTsharedPRE.bed	sv_8.gff	23	1.404	0.49	0.029703
OGTsharedPRE.bed	fd96Cb_58.gff	20	1.404	0.49	0.049505
OGTsharedPRE.bed	fkh_105.gff	21	1.405	0.49	0.059406
sharedOGTandPcl.bed	CG5669_22.gff	44	1.403	0.489	0.009901
OGTsharedPRE.bed	bin_5.gff	30	1.403	0.489	0.029703
OGTsharedPRE.bed	croc_54.gff	22	1.403	0.489	0.059406
OGTsharedPRE.bed	fkh_62.gff	20	1.403	0.488	0.069307
sharedOGTandPcl.bed	CrebA_2.gff	68	1.401	0.487	0.009901
OGTsharedPRE.bed	fkh_6.gff	21	1.402	0.487	0.039604
OGTsharedPRE.bed	slp1_18.gff	22	1.401	0.487	0.039604
OGTsharedPRE.bed	slp1_59.gff	22	1.401	0.487	0.039604
OGTsharedPRE.bed	slp1_107.gff	21	1.402	0.487	0.059406
OGTsharedPRE.bed	slp2_15.gff	18	1.402	0.487	0.069307
OGTsharedPRE.bed	CG11152_44.gff	21	1.401	0.486	0.039604
OGTsharedPRE.bed	fkh_4.gff	18	1.401	0.486	0.059406
OGTsharedPRE.bed	slp1_44.gff	21	1.401	0.486	0.069307
OGTsharedPRE.bed	slp2_59.gff	22	1.399	0.485	0.029703
OGTsharedPRE.bed	CG9571_49.gff	22	1.399	0.485	0.039604
OGTsharedPRE.bed	fd59A_105.gff	21	1.4	0.485	0.049505
OGTsharedPRE.bed	fd96Cb_92.gff	21	1.4	0.485	0.049505
OGTsharedPRE.bed	slp1_7.gff	21	1.4	0.485	0.059406
OGTsharedPRE.bed	slp2_63.gff	22	1.399	0.485	0.059406
OGTsharedPRE.bed	fd64A_76.gff	27	1.399	0.484	0.009901
OGTsharedPRE.bed	fd59A_106.gff	22	1.399	0.484	0.029703
OGTsharedPRE.bed	slp2_7.gff	21	1.399	0.484	0.059406
sharedOGTandPcl.bed	Poxm_7.gff	70	1.398	0.483	0.009901
sharedOGTandPcl.bed	Poxn_6.gff	70	1.398	0.483	0.009901
OGTsharedPRE.bed	CG9571_37.gff	21	1.397	0.483	0.029703
OGTsharedPRE.bed	srp_12.gff	20	1.398	0.483	0.059406
sharedOGTandPcl.bed	bi_9.gff	63	1.397	0.482	0.009901
OGTsharedPRE.bed	Poxn_5.gff	23	1.396	0.482	0.029703
OGTsharedPRE.bed	slp1_16.gff	20	1.397	0.482	0.049505
OGTsharedPRE.bed	Dfd_34.gff	23	1.396	0.482	0.059406
OGTsharedPRE.bed	fd96Ca_52.gff	22	1.397	0.482	0.059406
OGTsharedPRE.bed	slp1_23.gff	17	1.397	0.482	0.118812
OGTsharedPRE.bed	fd96Cb_88.gff	10	1.397	0.482	0.178218
OGTsharedPRE.bed	eg_4.gff	23	1.396	0.481	0.029703
OGTsharedPRE.bed	fd59A_85.gff	21	1.395	0.481	0.039604
OGTsharedPRE.bed	slp1_15.gff	18	1.395	0.481	0.049505
OGTsharedPRE.bed	croc_58.gff	22	1.396	0.481	0.059406
OGTsharedPRE.bed	Poxn_11.gff	21	1.395	0.481	0.069307
OGTsharedPRE.bed	Poxm_6.gff	23	1.395	0.48	0.049505
OGTsharedPRE.bed	Antp_2.gff	19	1.393	0.478	0.039604
OGTsharedPRE.bed	CG11152_43.gff	21	1.393	0.478	0.059406
OGTsharedPRE.bed	fd64A_31.gff	21	1.393	0.478	0.059406
OGTsharedPRE.bed	ac.gff	16	1.393	0.478	0.089109
sharedOGTandPcl.bed	Poxn_8.gff	70	1.391	0.477	0.009901
OGTsharedPRE.bed	CG9727_13.gff	22	1.392	0.477	0.049505
OGTsharedPRE.bed	fd64A_65.gff	20	1.392	0.477	0.059406
OGTsharedPRE.bed	fd59A_41.gff	21	1.392	0.477	0.069307
OGTsharedPRE.bed	slp2_22.gff	21	1.392	0.477	0.069307
OGTsharedPRE.bed	fd59A_16.gff	20	1.392	0.477	0.089109
sharedOGTandPcl.bed	HLH106.gff	68	1.391	0.476	0.009901
OGTsharedPRE.bed	fd96Ca_56.gff	22	1.39	0.475	0.069307
OGTalonepeaks.bed	PhoRC22.gff	1022	1.389	0.474	0.009901
OGTsharedPRE.bed	CG11152_85.gff	27	1.389	0.474	0.029703
OGTsharedPRE.bed	yps_2.gff	23	1.389	0.474	0.049505
OGTsharedPRE.bed	CG11152_63.gff	22	1.389	0.474	0.069307
OGTsharedPRE.bed	fd96Cb_91.gff	17	1.389	0.474	0.079208
OGTsharedPRE.bed	tap_3.gff	21	1.389	0.474	0.079208
OGTsharedPRE.bed	fd96Ca_93.gff	17	1.389	0.474	0.089109
OGTsharedPRE.bed	slp1_65.gff	17	1.389	0.474	0.108911
OGTsharedPRE.bed	bigmax_3.gff	19	1.388	0.473	0.089109
OGTsharedPRE.bed	slp2_103.gff	17	1.388	0.473	0.09901
OGTsharedPRE.bed	slp1_85.gff	27	1.387	0.472	0.019802
OGTsharedPRE.bed	CG9571_15.gff	18	1.387	0.472	0.059406
OGTsharedPRE.bed	Sp1_4.gff	20	1.387	0.472	0.089109
OGTsharedPRE.bed	croc_79.gff	27	1.386	0.471	0.039604
OGTsharedPRE.bed	fd64A_14.gff	20	1.386	0.471	0.049505
OGTsharedPRE.bed	sv_7.gff	23	1.386	0.471	0.059406
OGTsharedPRE.bed	fd59A_5.gff	18	1.386	0.471	0.089109
sharedOGTandPcl.bed	ap_12.gff	65	1.385	0.47	0.009901
sharedOGTandPcl.bed	exex_2.gff	59	1.385	0.47	0.009901
sharedOGTandPcl.bed	lmd_4.gff	67	1.385	0.47	0.009901
sharedOGTandPcl.bed	sv_12.gff	71	1.385	0.47	0.009901
OGTsharedPRE.bed	fkh_95.gff	21	1.385	0.47	0.049505
OGTsharedPRE.bed	fd96Cb_28.gff	21	1.385	0.47	0.059406
OGTsharedPRE.bed	fd96Cb_62.gff	20	1.385	0.47	0.069307
OGTsharedPRE.bed	CG5669_5.gff	20	1.385	0.47	0.079208
OGTsharedPRE.bed	CG9571_94.gff	21	1.384	0.469	0.039604
OGTsharedPRE.bed	Poxn_6.gff	23	1.384	0.469	0.049505
OGTsharedPRE.bed	CG11152_107.gff	21	1.384	0.469	0.059406
OGTsharedPRE.bed	CG11152_67.gff	20	1.384	0.469	0.059406
OGTsharedPRE.bed	fd96Ca_97.gff	21	1.384	0.469	0.069307
OGTsharedPRE.bed	ara_16.gff	19	1.384	0.469	0.079208
OGTsharedPRE.bed	fd96Ca_6.gff	21	1.384	0.469	0.09901
OGTsharedPRE.bed	croc_18.gff	20	1.383	0.468	0.069307
OGTsharedPRE.bed	slp2_40.gff	20	1.383	0.468	0.09901
OGTsharedPRE.bed	CG8765.gff	23	1.382	0.467	0.029703
OGTsharedPRE.bed	fd64A_79.gff	27	1.382	0.467	0.029703
OGTsharedPRE.bed	CG9727_22.gff	21	1.382	0.467	0.049505
OGTsharedPRE.bed	CG9571_55.gff	17	1.382	0.467	0.09901
sharedOGTandPcl.bed	sv_9.gff	70	1.381	0.466	0.009901
OGTsharedPRE.bed	zen2.gff	19	1.381	0.466	0.069307
OGTsharedPRE.bed	slp2_5.gff	18	1.381	0.466	0.079208
OGTsharedPRE.bed	CG9571_28.gff	21	1.381	0.465	0.049505
OGTsharedPRE.bed	fd59A_83.gff	27	1.38	0.465	0.069307
OGTsharedPRE.bed	slp2_107.gff	21	1.381	0.465	0.069307
sharedOGTandPcl.bed	Poxm_9.gff	70	1.379	0.464	0.009901
sharedOGTandPcl.bed	sr_13.gff	54	1.379	0.464	0.009901
OGTsharedPRE.bed	fd59A_80.gff	27	1.38	0.464	0.029703
OGTsharedPRE.bed	croc_82.gff	27	1.379	0.464	0.039604
OGTsharedPRE.bed	fd96Cb_6.gff	21	1.38	0.464	0.069307
OGTsharedPRE.bed	sna_4.gff	21	1.38	0.464	0.079208
OGTsharedPRE.bed	CG31670_2.gff	23	1.38	0.464	0.089109
OGTsharedPRE.bed	CG9571_7.gff	21	1.38	0.464	0.128713
sharedOGTandPcl.bed	vvl_33.gff	61	1.378	0.463	0.009901
OGTsharedPRE.bed	CTCF_2.gff	21	1.378	0.463	0.069307
sharedOGTandPcl.bed	bi_3.gff	68	1.378	0.462	0.009901
sharedOGTandPcl.bed	bi_6.gff	67	1.377	0.462	0.009901
OGTsharedPRE.bed	fd96Cb_48.gff	22	1.378	0.462	0.019802
OGTsharedPRE.bed	CG5669_8.gff	20	1.377	0.462	0.079208
OGTsharedPRE.bed	croc_19.gff	22	1.377	0.461	0.09901
OGTsharedPRE.bed	dan_2.gff	16	1.377	0.461	0.108911
OGTalonepeaks.bed	PhoRC1.gff	776	1.375	0.46	0.009901
sharedOGTandPcl.bed	cyc_7.gff	58	1.376	0.46	0.009901
OGTsharedPRE.bed	CG11152_16.gff	20	1.376	0.46	0.049505
OGTsharedPRE.bed	fkh_28.gff	21	1.375	0.46	0.059406
OGTsharedPRE.bed	fd59A_116.gff	21	1.375	0.46	0.089109
OGTsharedPRE.bed	fkh_58.gff	20	1.376	0.46	0.089109
OGTsharedPRE.bed	fd59A_30.gff	20	1.375	0.459	0.069307
OGTsharedPRE.bed	CG9571_72.gff	27	1.373	0.458	0.019802
OGTsharedPRE.bed	fd96Cb_76.gff	27	1.374	0.458	0.029703
OGTsharedPRE.bed	CG9571_97.gff	21	1.373	0.458	0.09901
OGTsharedPRE.bed	fd64A_95.gff	21	1.373	0.458	0.108911
OGTsharedPRE.bed	slp1_100.gff	10	1.374	0.458	0.188119
OGTsharedPRE.bed	CG9571_36.gff	21	1.373	0.457	0.069307
OGTsharedPRE.bed	fd96Cb_14.gff	18	1.373	0.457	0.079208
OGTsharedPRE.bed	foxo_3.gff	19	1.373	0.457	0.079208
OGTsharedPRE.bed	croc_100.gff	17	1.372	0.456	0.09901
OGTsharedPRE.bed	wor_4.gff	21	1.371	0.455	0.079208
OGTsharedPRE.bed	slp2.gff	17	1.371	0.455	0.158416
sharedOGTandPcl.bed	nub_9.gff	61	1.37	0.454	0.009901
sharedOGTandPcl.bed	Adf1.gff	41	1.37	0.454	0.019802
OGTsharedPRE.bed	fd96Ca_78.gff	27	1.37	0.454	0.029703
OGTsharedPRE.bed	sr_7.gff	18	1.37	0.454	0.049505
sharedOGTandPcl.bed	Poxn_4.gff	67	1.369	0.453	0.009901
OGTsharedPRE.bed	Poxn_4.gff	23	1.369	0.453	0.069307
OGTsharedPRE.bed	CrebB-17A_10.gff	21	1.369	0.453	0.089109
OGTsharedPRE.bed	sc.gff	16	1.369	0.453	0.128713
OGTsharedPRE.bed	slp2_87.gff	21	1.367	0.451	0.039604
OGTsharedPRE.bed	fd96Cb_73.gff	27	1.367	0.451	0.049505
OGTsharedPRE.bed	fd96Ca_13.gff	20	1.367	0.451	0.089109
OGTsharedPRE.bed	fd64A_112.gff	21	1.366	0.45	0.039604
OGTsharedPRE.bed	fd59A_59.gff	22	1.366	0.45	0.09901
sharedOGTandPcl.bed	sug.gff	62	1.365	0.449	0.009901
sharedOGTandPcl.bed	vvl_9.gff	61	1.365	0.449	0.009901
OGTsharedPRE.bed	CG9571_53.gff	22	1.365	0.449	0.09901
OGTsharedPRE.bed	bin_11.gff	21	1.365	0.448	0.059406
sharedOGTandPcl.bed	CrebA.gff	59	1.363	0.447	0.009901
OGTsharedPRE.bed	foxo_14.gff	19	1.363	0.447	0.049505
OGTsharedPRE.bed	croc_32.gff	21	1.364	0.447	0.069307
OGTsharedPRE.bed	fd96Ca_58.gff	17	1.363	0.447	0.09901
sharedOGTandPcl.bed	pdm2_9.gff	61	1.363	0.446	0.019802
OGTsharedPRE.bed	CG9571_75.gff	27	1.362	0.446	0.029703
sharedOGTandPcl.bed	Hr51.gff	60	1.362	0.445	0.009901
OGTsharedPRE.bed	CG11152_26.gff	20	1.361	0.445	0.069307
OGTsharedPRE.bed	CG11152.gff	17	1.361	0.445	0.069307
OGTsharedPRE.bed	svp_27.gff	22	1.361	0.445	0.079208
OGTsharedPRE.bed	zen.gff	19	1.361	0.445	0.09901
OGTsharedPRE.bed	FBgn0262477.gff	18	1.362	0.445	0.108911
sharedOGTandPcl.bed	bi_7.gff	69	1.359	0.443	0.009901
sharedOGTandPcl.bed	tai_3.gff	62	1.36	0.443	0.009901
OGTsharedPRE.bed	bin_36.gff	27	1.36	0.443	0.029703
OGTsharedPRE.bed	slp1_89.gff	20	1.36	0.443	0.089109
OGTsharedPRE.bed	ara_7.gff	18	1.36	0.443	0.09901
sharedOGTandPcl.bed	eg_5.gff	67	1.358	0.442	0.009901
sharedOGTandPcl.bed	Hey_3.gff	69	1.359	0.442	0.009901
sharedOGTandPcl.bed	Six4.gff	63	1.358	0.442	0.009901
OGTsharedPRE.bed	slp1_82.gff	27	1.358	0.442	0.029703
OGTsharedPRE.bed	bap_9.gff	21	1.358	0.442	0.069307
OGTsharedPRE.bed	slp2_16.gff	20	1.359	0.442	0.108911
OGTsharedPRE.bed	fd59A_15.gff	18	1.357	0.441	0.079208
sharedOGTandPcl.bed	sr_15.gff	53	1.356	0.44	0.009901
sharedOGTandPcl.bed	HLH106_6.gff	56	1.356	0.439	0.009901
OGTsharedPRE.bed	fd64A_15.gff	18	1.355	0.439	0.059406
OGTsharedPRE.bed	cyc.gff	21	1.356	0.439	0.069307
OGTsharedPRE.bed	da.gff	18	1.355	0.439	0.069307
OGTsharedPRE.bed	fkh_27.gff	20	1.356	0.439	0.069307
OGTsharedPRE.bed	slp1_31.gff	16	1.356	0.439	0.09901
OGTsharedPRE.bed	croc.gff	17	1.356	0.439	0.108911
OGTsharedPRE.bed	fd96Ca.gff	17	1.356	0.439	0.118812
sharedOGTandPcl.bed	so.gff	63	1.355	0.438	0.009901
OGTsharedPRE.bed	fkh_52.gff	22	1.355	0.438	0.049505
OGTsharedPRE.bed	slp2_85.gff	27	1.354	0.437	0.029703
sharedOGTandPcl.bed	CG7368_4.gff	33	1.354	0.437	0.029703
OGTsharedPRE.bed	croc_37.gff	20	1.354	0.437	0.039604
OGTsharedPRE.bed	croc_64.gff	20	1.354	0.437	0.059406
OGTsharedPRE.bed	bs_2.gff	18	1.353	0.437	0.09901
OGTsharedPRE.bed	fd59A_65.gff	20	1.354	0.437	0.09901
OGTsharedPRE.bed	CG9571_93.gff	17	1.354	0.437	0.108911
OGTsharedPRE.bed	Scr_3.gff	19	1.353	0.436	0.049505
OGTsharedPRE.bed	croc_104.gff	21	1.352	0.435	0.059406
OGTsharedPRE.bed	fd59A_31.gff	21	1.352	0.435	0.059406
OGTsharedPRE.bed	CG11152_54.gff	19	1.352	0.435	0.118812
sharedOGTandPcl.bed	PhoRC19.gff	69	1.351	0.434	0.009901
OGTsharedPRE.bed	CG11152_101.gff	21	1.351	0.434	0.049505
OGTsharedPRE.bed	CG11152_87.gff	21	1.351	0.434	0.069307
OGTsharedPRE.bed	sv_14.gff	23	1.351	0.434	0.089109
OGTsharedPRE.bed	croc_84.gff	21	1.351	0.434	0.09901
OGTsharedPRE.bed	fkh_14.gff	18	1.351	0.434	0.108911
sharedOGTandPcl.bed	Jra_3.gff	65	1.35	0.433	0.009901
sharedOGTandPcl.bed	nub_39.gff	61	1.35	0.433	0.009901
OGTsharedPRE.bed	CG11152_102.gff	20	1.35	0.433	0.069307
OGTsharedPRE.bed	CG9571_43.gff	19	1.35	0.433	0.079208
OGTsharedPRE.bed	fd96Ca_15.gff	20	1.35	0.433	0.079208
OGTsharedPRE.bed	foxo_9.gff	21	1.35	0.433	0.089109
OGTsharedPRE.bed	CG11152_40.gff	20	1.35	0.433	0.09901
sharedOGTandPcl.bed	kni_5.gff	67	1.349	0.432	0.009901
sharedOGTandPcl.bed	tgo_12.gff	62	1.349	0.432	0.009901
OGTsharedPRE.bed	slp2_33.gff	21	1.349	0.432	0.049505
OGTsharedPRE.bed	slp1_87.gff	21	1.349	0.432	0.079208
OGTsharedPRE.bed	fd96Ca_60.gff	20	1.35	0.432	0.089109
OGTsharedPRE.bed	CG11152_15.gff	18	1.349	0.432	0.118812
OGTsharedPRE.bed	croc_51.gff	19	1.349	0.432	0.128713
sharedOGTandPcl.bed	Poxm_19.gff	68	1.348	0.431	0.009901
OGTsharedPRE.bed	fd96Ca_29.gff	20	1.348	0.431	0.09901
OGTsharedPRE.bed	fkh_76.gff	27	1.347	0.43	0.019802
OGTsharedPRE.bed	fd96Ca_91.gff	21	1.347	0.43	0.089109
OGTsharedPRE.bed	abd-A_3.gff	19	1.348	0.43	0.09901
OGTsharedPRE.bed	CG11152_103.gff	17	1.347	0.43	0.108911
sharedOGTandPcl.bed	lola_11.gff	59	1.346	0.428	0.009901
sharedOGTandPcl.bed	tgo_16.gff	62	1.345	0.428	0.009901
OGTsharedPRE.bed	croc_68.gff	20	1.345	0.428	0.09901
OGTsharedPRE.bed	fd96Ca_14.gff	18	1.345	0.428	0.118812
sharedOGTandPcl.bed	sv_21.gff	68	1.344	0.427	0.009901
sharedOGTandPcl.bed	Dr_3.gff	53	1.344	0.427	0.019802
OGTsharedPRE.bed	Poxm_7.gff	23	1.344	0.427	0.039604
OGTsharedPRE.bed	CG9571_91.gff	21	1.344	0.427	0.069307
OGTsharedPRE.bed	fd64A_40.gff	21	1.344	0.427	0.079208
OGTsharedPRE.bed	da_21.gff	20	1.344	0.427	0.09901
OGTsharedPRE.bed	CG9571_90.gff	10	1.344	0.427	0.227723
OGTalonepeaks.bed	nej2.gff	1147	1.344	0.426	0.009901
sharedOGTandPcl.bed	bigmax_3.gff	57	1.344	0.426	0.019802
sharedOGTandPcl.bed	lmd.gff	57	1.343	0.426	0.019802
OGTsharedPRE.bed	CG9571_14.gff	20	1.343	0.426	0.069307
OGTsharedPRE.bed	fd96Cb_52.gff	22	1.343	0.426	0.069307
OGTsharedPRE.bed	croc_15.gff	20	1.343	0.426	0.089109
OGTsharedPRE.bed	Dfd_63.gff	20	1.343	0.426	0.128713
OGTalonepeaks.bed	Cf2_2.gff	1230	1.343	0.425	0.009901
OGTsharedPRE.bed	danr_2.gff	16	1.342	0.425	0.069307
OGTsharedPRE.bed	slp2_101.gff	21	1.343	0.425	0.069307
OGTsharedPRE.bed	slp1_14.gff	20	1.342	0.425	0.089109
OGTsharedPRE.bed	slp2_26.gff	20	1.342	0.425	0.089109
OGTsharedPRE.bed	slp1_71.gff	20	1.342	0.425	0.09901
OGTsharedPRE.bed	fd64A_17.gff	20	1.341	0.424	0.059406
OGTsharedPRE.bed	CrebB-17A_12.gff	20	1.341	0.424	0.069307
OGTsharedPRE.bed	esg_4.gff	21	1.342	0.424	0.089109
OGTsharedPRE.bed	fkh.gff	17	1.342	0.424	0.09901
sharedOGTandPcl.bed	Poxm_5.gff	67	1.34	0.423	0.009901
OGTsharedPRE.bed	da_45.gff	18	1.34	0.423	0.128713
OGTsharedPRE.bed	fd96Ca_90.gff	10	1.34	0.423	0.217822
sharedOGTandPcl.bed	bi_19.gff	64	1.339	0.422	0.009901
sharedOGTandPcl.bed	pdm2_39.gff	61	1.34	0.422	0.009901
sharedOGTandPcl.bed	lmd_2.gff	56	1.34	0.422	0.019802
OGTsharedPRE.bed	croc_31.gff	20	1.34	0.422	0.079208
OGTsharedPRE.bed	fd64A_83.gff	20	1.34	0.422	0.079208
OGTsharedPRE.bed	fd59A_101.gff	17	1.34	0.422	0.158416
sharedOGTandPcl.bed	h_5.gff	66	1.339	0.421	0.009901
OGTsharedPRE.bed	slp2_82.gff	27	1.339	0.421	0.029703
OGTsharedPRE.bed	CG17181.gff	20	1.339	0.421	0.059406
OGTsharedPRE.bed	fd96Cb_21.gff	20	1.339	0.421	0.069307
OGTsharedPRE.bed	slp1_116.gff	19	1.339	0.421	0.089109
OGTsharedPRE.bed	ftz_2.gff	19	1.339	0.421	0.108911
sharedOGTandPcl.bed	dpn_7.gff	67	1.338	0.42	0.009901
sharedOGTandPcl.bed	sr_27.gff	63	1.338	0.42	0.009901
OGTsharedPRE.bed	Ubx_15.gff	19	1.338	0.42	0.069307
OGTsharedPRE.bed	fd59A_69.gff	20	1.338	0.42	0.09901
OGTsharedPRE.bed	fd64A.gff	17	1.338	0.42	0.09901
sharedOGTandPcl.bed	Doc2.gff	60	1.337	0.419	0.009901
sharedOGTandPcl.bed	sr_2.gff	65	1.337	0.419	0.009901
OGTsharedPRE.bed	fd64A_94.gff	10	1.337	0.419	0.257426
sharedOGTandPcl.bed	cyc_10.gff	62	1.336	0.418	0.009901
OGTsharedPRE.bed	FBgn0262477_2.gff	19	1.336	0.418	0.079208
OGTsharedPRE.bed	Eip78C.gff	18	1.335	0.417	0.09901
OGTsharedPRE.bed	fd96Ca_48.gff	19	1.334	0.416	0.108911
OGTsharedPRE.bed	fd64A_97.gff	17	1.334	0.416	0.138614
sharedOGTandPcl.bed	Aef1.gff	46	1.334	0.415	0.009901
sharedOGTandPcl.bed	knrl_5.gff	67	1.333	0.415	0.009901
OGTsharedPRE.bed	bi_6.gff	21	1.333	0.415	0.059406
OGTsharedPRE.bed	croc_7.gff	20	1.333	0.415	0.069307
OGTsharedPRE.bed	CG11152_6.gff	20	1.333	0.415	0.09901
OGTsharedPRE.bed	slp1_51.gff	19	1.333	0.415	0.09901
OGTsharedPRE.bed	slp2_71.gff	20	1.332	0.414	0.09901
OGTsharedPRE.bed	fd96Cb_13.gff	20	1.332	0.414	0.108911
sharedOGTandPcl.bed	RunxA_6.gff	67	1.331	0.413	0.009901
sharedOGTandPcl.bed	D19A.gff	61	1.331	0.413	0.019802
sharedOGTandPcl.bed	repo_11.gff	55	1.331	0.413	0.019802
OGTsharedPRE.bed	fd96Cb_89.gff	21	1.332	0.413	0.079208
OGTsharedPRE.bed	CG9571_92.gff	20	1.332	0.413	0.089109
OGTsharedPRE.bed	slp1_67.gff	20	1.332	0.413	0.089109
sharedOGTandPcl.bed	sv_7.gff	67	1.331	0.412	0.009901
OGTsharedPRE.bed	fd59A_62.gff	29	1.33	0.412	0.029703
sharedOGTandPcl.bed	CG7368_2.gff	33	1.331	0.412	0.039604
OGTsharedPRE.bed	fd96Ca_75.gff	27	1.331	0.412	0.049505
OGTsharedPRE.bed	tgo.gff	21	1.331	0.412	0.089109
OGTsharedPRE.bed	ci_2.gff	22	1.331	0.412	0.09901
OGTsharedPRE.bed	usp_10.gff	19	1.331	0.412	0.09901
sharedOGTandPcl.bed	dpn_5.gff	66	1.329	0.411	0.009901
sharedOGTandPcl.bed	Poxm_14.gff	66	1.329	0.411	0.009901
sharedOGTandPcl.bed	rn.gff	57	1.329	0.411	0.019802
OGTsharedPRE.bed	croc_48.gff	19	1.33	0.411	0.108911
OGTsharedPRE.bed	ftz_56.gff	20	1.33	0.411	0.108911
OGTsharedPRE.bed	rn.gff	18	1.329	0.411	0.108911
OGTsharedPRE.bed	fkh_26.gff	16	1.33	0.411	0.118812
OGTsharedPRE.bed	Scr_19.gff	19	1.33	0.411	0.128713
OGTsharedPRE.bed	fd59A_37.gff	20	1.33	0.411	0.148515
OGTsharedPRE.bed	fkh_56.gff	17	1.329	0.411	0.148515
sharedOGTandPcl.bed	h_2.gff	66	1.329	0.41	0.009901
OGTsharedPRE.bed	CG5669_18.gff	18	1.328	0.41	0.108911
OGTsharedPRE.bed	ase.gff	16	1.328	0.409	0.108911
OGTsharedPRE.bed	CG9571_79.gff	20	1.328	0.409	0.118812
OGTsharedPRE.bed	slp1_54.gff	19	1.328	0.409	0.138614
sharedOGTandPcl.bed	bap_2.gff	60	1.327	0.408	0.009901
sharedOGTandPcl.bed	h_3.gff	66	1.327	0.408	0.009901
OGTsharedPRE.bed	bin_25.gff	29	1.327	0.408	0.079208
OGTsharedPRE.bed	fkh_33.gff	20	1.327	0.408	0.079208
OGTsharedPRE.bed	CG9571_46.gff	19	1.327	0.408	0.089109
OGTsharedPRE.bed	fd96Cb_80.gff	19	1.327	0.408	0.09901
OGTsharedPRE.bed	foxo_4.gff	21	1.327	0.408	0.118812
OGTsharedPRE.bed	fd96Cb.gff	17	1.327	0.408	0.148515
sharedOGTandPcl.bed	HLH4C_11.gff	56	1.326	0.407	0.009901
OGTsharedPRE.bed	CG11152_89.gff	20	1.326	0.407	0.079208
OGTsharedPRE.bed	CG9571_77.gff	21	1.326	0.407	0.09901
OGTsharedPRE.bed	da_2.gff	19	1.325	0.406	0.108911
OGTsharedPRE.bed	slp1.gff	17	1.325	0.406	0.108911
OGTsharedPRE.bed	fd64A_110.gff	19	1.325	0.406	0.118812
OGTsharedPRE.bed	fd96Cb_42.gff	19	1.325	0.406	0.118812
OGTalonepeaks.bed	PhoRC2.gff	1230	1.324	0.405	0.009901
sharedOGTandPcl.bed	CrebB-17A.gff	65	1.324	0.405	0.009901
sharedOGTandPcl.bed	dpn_4.gff	57	1.324	0.405	0.009901
sharedOGTandPcl.bed	Rx_25.gff	55	1.324	0.405	0.009901
sharedOGTandPcl.bed	Tbp_8.gff	61	1.324	0.405	0.009901
sharedOGTandPcl.bed	tgo_14.gff	64	1.325	0.405	0.009901
OGTsharedPRE.bed	slp1_32.gff	20	1.325	0.405	0.049505
OGTsharedPRE.bed	Ubx_2.gff	19	1.324	0.405	0.079208
OGTsharedPRE.bed	fd96Cb_56.gff	17	1.324	0.405	0.118812
sharedOGTandPcl.bed	HLHm3_2.gff	61	1.323	0.404	0.009901
OGTsharedPRE.bed	fd59A_99.gff	21	1.323	0.404	0.059406
OGTsharedPRE.bed	croc_88.gff	20	1.324	0.404	0.079208
OGTsharedPRE.bed	da_42.gff	21	1.323	0.404	0.089109
OGTsharedPRE.bed	slp2_67.gff	20	1.324	0.404	0.09901
sharedOGTandPcl.bed	brk.gff	58	1.323	0.403	0.009901
sharedOGTandPcl.bed	byn_5.gff	62	1.323	0.403	0.009901
sharedOGTandPcl.bed	cyc_8.gff	64	1.322	0.403	0.009901
sharedOGTandPcl.bed	Hey_4.gff	68	1.322	0.403	0.009901
sharedOGTandPcl.bed	Poxm_6.gff	66	1.322	0.403	0.009901
OGTsharedPRE.bed	fd64A_61.gff	20	1.32	0.401	0.128713
OGTsharedPRE.bed	slp1_91.gff	20	1.319	0.4	0.069307
OGTsharedPRE.bed	fkh_21.gff	20	1.319	0.4	0.09901
OGTsharedPRE.bed	fd64A_59.gff	17	1.32	0.4	0.108911
sharedOGTandPcl.bed	CG34340_27.gff	55	1.318	0.399	0.009901
sharedOGTandPcl.bed	so_2.gff	64	1.319	0.399	0.009901
OGTsharedPRE.bed	cyc_9.gff	21	1.318	0.399	0.069307
OGTsharedPRE.bed	fd96Ca_36.gff	20	1.318	0.399	0.09901
OGTsharedPRE.bed	CG11152_65.gff	17	1.319	0.399	0.148515
sharedOGTandPcl.bed	brk_2.gff	58	1.318	0.398	0.009901
sharedOGTandPcl.bed	Nf-YA.gff	67	1.317	0.398	0.009901
sharedOGTandPcl.bed	Doc3.gff	60	1.318	0.398	0.019802
OGTsharedPRE.bed	fd96Cb_55.gff	29	1.318	0.398	0.049505
OGTsharedPRE.bed	fd96Cb_26.gff	16	1.318	0.398	0.148515
sharedOGTandPcl.bed	klu_2.gff	43	1.317	0.397	0.039604
sharedOGTandPcl.bed	FBgn0263112_7.gff	52	1.316	0.396	0.019802
OGTsharedPRE.bed	slp2_102.gff	20	1.316	0.396	0.079208
OGTsharedPRE.bed	Sp1_8.gff	20	1.316	0.396	0.089109
Pclalonepeaks.bed	CG7368_4.gff	1007	1.315	0.395	0.009901
sharedOGTandPcl.bed	D19B.gff	61	1.315	0.395	0.009901
sharedOGTandPcl.bed	nej4.gff	60	1.315	0.395	0.029703
OGTsharedPRE.bed	fd59A_51.gff	19	1.315	0.395	0.089109
OGTsharedPRE.bed	bin_10.gff	20	1.315	0.395	0.128713
sharedOGTandPcl.bed	CrebB-17A_8.gff	65	1.314	0.394	0.009901
sharedOGTandPcl.bed	dpn_3.gff	66	1.314	0.394	0.009901
sharedOGTandPcl.bed	scro_2.gff	60	1.314	0.394	0.019802
sharedOGTandPcl.bed	FBgn0263112.gff	62	1.314	0.394	0.039604
OGTsharedPRE.bed	tll.gff	20	1.314	0.394	0.059406
OGTsharedPRE.bed	tgo_15.gff	21	1.314	0.394	0.079208
OGTsharedPRE.bed	CG11152_32.gff	20	1.314	0.394	0.09901
OGTsharedPRE.bed	croc_86.gff	20	1.314	0.394	0.108911
OGTsharedPRE.bed	fd96Cb_33.gff	20	1.314	0.394	0.148515
sharedOGTandPcl.bed	HLHm7_2.gff	61	1.314	0.393	0.009901
OGTsharedPRE.bed	fkh_18.gff	20	1.313	0.393	0.108911
sharedOGTandPcl.bed	Vsx2_11.gff	55	1.312	0.392	0.009901
OGTsharedPRE.bed	fkh_55.gff	29	1.312	0.392	0.019802
sharedOGTandPcl.bed	pnr_29.gff	41	1.312	0.392	0.029703
OGTsharedPRE.bed	croc_9.gff	18	1.312	0.392	0.09901
OGTsharedPRE.bed	CG11152_35.gff	20	1.312	0.392	0.138614
OGTsharedPRE.bed	Bteb2.gff	15	1.312	0.392	0.148515
sharedOGTandPcl.bed	ci_5.gff	66	1.311	0.391	0.009901
sharedOGTandPcl.bed	Doc1.gff	60	1.311	0.391	0.019802
sharedOGTandPcl.bed	ara_14.gff	53	1.311	0.391	0.039604
OGTsharedPRE.bed	fd96Cb_45.gff	19	1.311	0.391	0.108911
OGTsharedPRE.bed	CG11152_116.gff	19	1.311	0.391	0.148515
OGTsharedPRE.bed	zen_4.gff	19	1.311	0.391	0.168317
sharedOGTandPcl.bed	Bteb2_2.gff	63	1.31	0.39	0.019802
sharedOGTandPcl.bed	Dfd_23.gff	52	1.31	0.39	0.019802
sharedOGTandPcl.bed	Mio.gff	57	1.31	0.39	0.019802
OGTsharedPRE.bed	CG11152_82.gff	27	1.31	0.39	0.049505
OGTsharedPRE.bed	slp1_26.gff	20	1.311	0.39	0.089109
OGTsharedPRE.bed	ttk_5.gff	19	1.31	0.39	0.118812
sharedOGTandPcl.bed	h_7.gff	67	1.31	0.389	0.009901
OGTsharedPRE.bed	exd_11.gff	19	1.309	0.389	0.079208
sharedOGTandPcl.bed	HLH3B_4.gff	57	1.308	0.388	0.009901
OGTsharedPRE.bed	foxo_11.gff	20	1.309	0.388	0.079208
OGTsharedPRE.bed	CG3065.gff	20	1.309	0.388	0.108911
OGTsharedPRE.bed	abd-A_19.gff	19	1.309	0.388	0.118812
sharedOGTandPcl.bed	dpn_2.gff	66	1.308	0.387	0.009901
sharedOGTandPcl.bed	al_31.gff	55	1.307	0.387	0.029703
OGTsharedPRE.bed	slp1_101.gff	21	1.308	0.387	0.089109
OGTsharedPRE.bed	CG11152_51.gff	19	1.308	0.387	0.118812
OGTsharedPRE.bed	slp2_20.gff	20	1.308	0.387	0.118812
Pclalonepeaks.bed	PhoRC1.gff	684	1.307	0.386	0.009901
sharedOGTandPcl.bed	bigmax_2.gff	55	1.307	0.386	0.019802
OGTsharedPRE.bed	slp2_32.gff	20	1.306	0.386	0.118812
OGTsharedPRE.bed	fd96Cb_27.gff	20	1.307	0.386	0.138614
OGTsharedPRE.bed	Ubx_52.gff	20	1.307	0.386	0.138614
sharedOGTandPcl.bed	Vsx1_9.gff	55	1.306	0.385	0.009901
OGTsharedPRE.bed	slp1_115.gff	21	1.306	0.385	0.079208
OGTsharedPRE.bed	Dfd_2.gff	19	1.306	0.385	0.118812
sharedOGTandPcl.bed	Clk_4.gff	59	1.305	0.384	0.009901
OGTsharedPRE.bed	slp1_58.gff	20	1.305	0.384	0.089109
OGTsharedPRE.bed	fkh_47.gff	20	1.305	0.384	0.108911
OGTsharedPRE.bed	CG9727_43.gff	19	1.305	0.384	0.118812
OGTsharedPRE.bed	fd64A_30.gff	20	1.305	0.384	0.128713
OGTsharedPRE.bed	sr_5.gff	20	1.305	0.384	0.148515
OGTsharedPRE.bed	CG11152_20.gff	20	1.304	0.383	0.108911
OGTsharedPRE.bed	croc_97.gff	10	1.304	0.383	0.217822
sharedOGTandPcl.bed	bi_10.gff	64	1.303	0.382	0.009901
OGTsharedPRE.bed	fd96Ca_18.gff	20	1.303	0.382	0.118812
OGTsharedPRE.bed	fd64A_6.gff	20	1.303	0.382	0.128713
Pclalonepeaks.bed	PhoRC22.gff	856	1.302	0.381	0.009901
sharedOGTandPcl.bed	HLH4C_9.gff	59	1.302	0.381	0.009901
sharedOGTandPcl.bed	FBgn0261930_2.gff	60	1.302	0.381	0.019802
sharedOGTandPcl.bed	nej1.gff	36	1.302	0.381	0.019802
OGTsharedPRE.bed	croc_61.gff	29	1.302	0.381	0.059406
OGTsharedPRE.bed	Sp1_18.gff	18	1.302	0.381	0.148515
OGTalonepeaks.bed	Cf2.gff	1519	1.301	0.38	0.009901
sharedOGTandPcl.bed	HLH3B_7.gff	56	1.301	0.38	0.009901
sharedOGTandPcl.bed	sv_16.gff	66	1.302	0.38	0.009901
OGTsharedPRE.bed	slp1_40.gff	20	1.301	0.38	0.108911
OGTsharedPRE.bed	fd59A_24.gff	20	1.301	0.38	0.118812
OGTsharedPRE.bed	fd96Ca_5.gff	20	1.301	0.38	0.128713
OGTsharedPRE.bed	danr.gff	14	1.301	0.38	0.178218
sharedOGTandPcl.bed	CG11152_22.gff	57	1.301	0.379	0.019802
sharedOGTandPcl.bed	nub_35.gff	58	1.3	0.379	0.039604
OGTsharedPRE.bed	Dfd_16.gff	19	1.3	0.379	0.079208
OGTsharedPRE.bed	fd59A_29.gff	16	1.301	0.379	0.138614
OGTsharedPRE.bed	fkh_90.gff	20	1.3	0.379	0.138614
sharedOGTandPcl.bed	caup_14.gff	53	1.3	0.378	0.009901
sharedOGTandPcl.bed	CrebA_4.gff	65	1.3	0.378	0.009901
sharedOGTandPcl.bed	sv_8.gff	66	1.3	0.378	0.009901
sharedOGTandPcl.bed	tai.gff	59	1.3	0.378	0.029703
OGTsharedPRE.bed	fd64A_50.gff	19	1.3	0.378	0.059406
OGTsharedPRE.bed	CG3065_2.gff	21	1.3	0.378	0.089109
OGTsharedPRE.bed	Scr_68.gff	20	1.3	0.378	0.108911
OGTsharedPRE.bed	fd96Ca_45.gff	19	1.3	0.378	0.138614
sharedOGTandPcl.bed	Sp1_4.gff	58	1.299	0.377	0.009901
sharedOGTandPcl.bed	svp_11.gff	63	1.299	0.377	0.009901
OGTsharedPRE.bed	CG9571_6.gff	20	1.299	0.377	0.079208
OGTsharedPRE.bed	CG11152_58.gff	20	1.299	0.377	0.089109
OGTsharedPRE.bed	fd96Ca_9.gff	18	1.299	0.377	0.089109
OGTsharedPRE.bed	RunxA.gff	21	1.299	0.377	0.089109
OGTsharedPRE.bed	slp2_89.gff	20	1.299	0.377	0.089109
OGTsharedPRE.bed	CG9571_81.gff	20	1.299	0.377	0.108911
OGTsharedPRE.bed	caup_7.gff	18	1.299	0.377	0.138614
OGTsharedPRE.bed	fd96Cb_18.gff	20	1.299	0.377	0.148515
sharedOGTandPcl.bed	FBgn0263112_9.gff	63	1.297	0.376	0.019802
sharedOGTandPcl.bed	ss_4.gff	65	1.298	0.376	0.029703
OGTsharedPRE.bed	fd64A_113.gff	19	1.298	0.376	0.128713
sharedOGTandPcl.bed	CG5669_5.gff	58	1.297	0.375	0.009901
sharedOGTandPcl.bed	Poxn_5.gff	66	1.297	0.375	0.009901
OGTsharedPRE.bed	fd96Ca_108.gff	19	1.297	0.375	0.09901
OGTsharedPRE.bed	fd96Cb_90.gff	20	1.297	0.375	0.138614
sharedOGTandPcl.bed	Hr78_7.gff	63	1.296	0.374	0.009901
OGTsharedPRE.bed	fd59A_6.gff	20	1.296	0.374	0.108911
OGTsharedPRE.bed	bin_12.gff	20	1.296	0.374	0.128713
OGTsharedPRE.bed	Antp_65.gff	20	1.296	0.374	0.148515
OGTsharedPRE.bed	dan.gff	14	1.296	0.374	0.168317
OGTsharedPRE.bed	fd96Cb_106.gff	19	1.296	0.374	0.188119
sharedOGTandPcl.bed	HLH3B_5.gff	59	1.295	0.373	0.009901
OGTsharedPRE.bed	slp1_20.gff	20	1.295	0.373	0.09901
sharedOGTandPcl.bed	HLHm7_3.gff	60	1.294	0.372	0.009901
sharedOGTandPcl.bed	Hey_5.gff	65	1.293	0.371	0.009901
OGTsharedPRE.bed	fd96Cb_103.gff	21	1.293	0.371	0.069307
OGTsharedPRE.bed	fkh_79.gff	20	1.293	0.371	0.079208
OGTsharedPRE.bed	fd64A_21.gff	20	1.293	0.371	0.108911
OGTsharedPRE.bed	CG9571_48.gff	20	1.294	0.371	0.128713
OGTsharedPRE.bed	btd_2.gff	19	1.293	0.371	0.138614
OGTalonepeaks.bed	PhoRC8.gff	1221	1.292	0.37	0.009901
Pclalonepeaks.bed	CG7368_2.gff	983	1.293	0.37	0.009901
sharedOGTandPcl.bed	achi_12.gff	60	1.292	0.37	0.009901
sharedOGTandPcl.bed	FBgn0263112_11.gff	62	1.292	0.37	0.019802
sharedOGTandPcl.bed	lab_34.gff	56	1.292	0.37	0.039604
OGTsharedPRE.bed	fd96Ca_81.gff	20	1.292	0.37	0.128713
OGTsharedPRE.bed	croc_25.gff	20	1.292	0.37	0.138614
OGTsharedPRE.bed	slp1_6.gff	20	1.292	0.37	0.138614
OGTsharedPRE.bed	slp2_6.gff	20	1.292	0.37	0.138614
sharedOGTandPcl.bed	HLHmbeta_3.gff	60	1.291	0.369	0.009901
sharedOGTandPcl.bed	klu_3.gff	50	1.292	0.369	0.009901
sharedOGTandPcl.bed	grn_29.gff	41	1.291	0.369	0.029703
sharedOGTandPcl.bed	mirr_13.gff	53	1.291	0.369	0.029703
OGTsharedPRE.bed	foxo_19.gff	21	1.292	0.369	0.089109
OGTsharedPRE.bed	FBgn0263118.gff	20	1.291	0.369	0.158416
OGTsharedPRE.bed	fd96Ca_23.gff	20	1.291	0.369	0.158416
sharedOGTandPcl.bed	Hmx_13.gff	63	1.291	0.368	0.009901
OGTsharedPRE.bed	slp1_48.gff	20	1.29	0.368	0.069307
OGTsharedPRE.bed	fkh_5.gff	20	1.29	0.368	0.128713
OGTsharedPRE.bed	CG9571_63.gff	17	1.291	0.368	0.168317
sharedOGTandPcl.bed	fd59A_22.gff	57	1.29	0.367	0.009901
sharedOGTandPcl.bed	HLHmgamma_2.gff	61	1.29	0.367	0.009901
sharedOGTandPcl.bed	Pph13_61.gff	52	1.29	0.367	0.009901
sharedOGTandPcl.bed	HLHmgamma_3.gff	60	1.29	0.367	0.019802
OGTsharedPRE.bed	fd59A_48.gff	19	1.29	0.367	0.118812
sharedOGTandPcl.bed	bi_17.gff	65	1.289	0.366	0.009901
sharedOGTandPcl.bed	HLHm5.gff	61	1.289	0.366	0.019802
sharedOGTandPcl.bed	Scr_26.gff	52	1.289	0.366	0.019802
sharedOGTandPcl.bed	Dfd_62.gff	56	1.289	0.366	0.029703
OGTsharedPRE.bed	croc_34.gff	20	1.289	0.366	0.089109
OGTsharedPRE.bed	sv_10.gff	21	1.289	0.366	0.09901
OGTsharedPRE.bed	CG7056.gff	20	1.289	0.366	0.108911
OGTsharedPRE.bed	FBgn0261705_11.gff	21	1.289	0.366	0.108911
OGTsharedPRE.bed	tin_4.gff	17	1.289	0.366	0.178218
OGTalonepeaks.bed	Jra_19.gff	1887	1.288	0.365	0.009901
sharedOGTandPcl.bed	Dfd_59.gff	59	1.288	0.365	0.009901
sharedOGTandPcl.bed	Cf2_6.gff	60	1.288	0.365	0.029703
OGTsharedPRE.bed	CG10267_2.gff	19	1.288	0.365	0.09901
sharedOGTandPcl.bed	FBgn0261963_6.gff	61	1.287	0.364	0.019802
sharedOGTandPcl.bed	HLHmbeta_2.gff	61	1.287	0.364	0.019802
OGTsharedPRE.bed	fd59A_89.gff	20	1.287	0.364	0.108911
OGTsharedPRE.bed	RunxA_2.gff	20	1.287	0.364	0.158416
sharedOGTandPcl.bed	sr_25.gff	57	1.286	0.363	0.009901
sharedOGTandPcl.bed	CG31670_2.gff	63	1.286	0.363	0.019802
sharedOGTandPcl.bed	org-1_13.gff	61	1.286	0.363	0.019802
OGTsharedPRE.bed	bin_6.gff	20	1.286	0.363	0.09901
OGTsharedPRE.bed	fd59A_20.gff	20	1.286	0.363	0.118812
OGTsharedPRE.bed	fd59A_117.gff	19	1.286	0.363	0.128713
OGTsharedPRE.bed	B-H2_12.gff	19	1.286	0.363	0.138614
OGTsharedPRE.bed	tai.gff	19	1.286	0.363	0.138614
OGTsharedPRE.bed	fd64A_29.gff	16	1.286	0.363	0.148515
OGTsharedPRE.bed	slp2_73.gff	17	1.286	0.363	0.148515
OGTsharedPRE.bed	sr_16.gff	17	1.286	0.363	0.207921
sharedOGTandPcl.bed	sim.gff	55	1.285	0.362	0.009901
OGTsharedPRE.bed	fd96Ca_92.gff	20	1.285	0.362	0.09901
OGTsharedPRE.bed	Poxn_7.gff	21	1.285	0.362	0.128713
sharedOGTandPcl.bed	ftz_23.gff	52	1.285	0.361	0.009901
sharedOGTandPcl.bed	CG32532_14.gff	55	1.284	0.361	0.019802
sharedOGTandPcl.bed	sr.gff	60	1.285	0.361	0.019802
sharedOGTandPcl.bed	h_4.gff	57	1.285	0.361	0.029703
sharedOGTandPcl.bed	HLHm5_3.gff	56	1.284	0.361	0.029703
OGTsharedPRE.bed	CG9571_57.gff	20	1.285	0.361	0.089109
OGTsharedPRE.bed	foxo_17.gff	21	1.284	0.361	0.128713
OGTsharedPRE.bed	fkh_91.gff	17	1.284	0.361	0.158416
sharedOGTandPcl.bed	HLH4C_4.gff	57	1.284	0.36	0.009901
sharedOGTandPcl.bed	Max_2.gff	51	1.284	0.36	0.009901
OGTsharedPRE.bed	fd59A_113.gff	21	1.284	0.36	0.108911
OGTsharedPRE.bed	CG9571_27.gff	16	1.283	0.36	0.128713
OGTsharedPRE.bed	toy.gff	20	1.284	0.36	0.138614
OGTsharedPRE.bed	fd64A_96.gff	20	1.284	0.36	0.148515
OGTsharedPRE.bed	slp2_100.gff	10	1.284	0.36	0.267327
sharedOGTandPcl.bed	Mnt.gff	51	1.282	0.359	0.009901
OGTsharedPRE.bed	Scr_14.gff	18	1.283	0.359	0.108911
OGTsharedPRE.bed	fd96Ca_7.gff	18	1.283	0.359	0.118812
OGTsharedPRE.bed	croc_53.gff	20	1.283	0.359	0.138614
OGTsharedPRE.bed	fd64A_52.gff	20	1.283	0.359	0.138614
sharedOGTandPcl.bed	Blimp-1_3.gff	59	1.281	0.358	0.019802
sharedOGTandPcl.bed	repo_25.gff	52	1.282	0.358	0.019802
sharedOGTandPcl.bed	vvl_38.gff	56	1.282	0.358	0.019802
OGTsharedPRE.bed	FBgn0263239_10.gff	21	1.282	0.358	0.09901
OGTsharedPRE.bed	slp1_102.gff	20	1.281	0.358	0.09901
OGTsharedPRE.bed	fd59A_100.gff	20	1.282	0.358	0.108911
OGTsharedPRE.bed	fkh_45.gff	19	1.282	0.358	0.118812
[truncated: 19,293 more rows]

## Sheet: OGT PCL  cis-overlaps
target	reference	overlap_size	overlap_enrichment	log2_enrichment	pval
[truncated: 305 more rows]

[truncated: 1 more sheets: Sr targets]
